# Supplementary material for: Cell type–specific gene regulatory atlas prioritizes drug targets and repurposable medicines in Alzheimer's disease
Source: HighWire-hosted journal article supplement (doi:10.1101/gr.280436.125), 2026-01-21
Supplement: Supplemental_Table_S1.xlsx [file Supplemental_Table_S1.xlsx]

## Sheet: SEA-AD_Cohort_Metadata
Donor ID	Primary Study Name	Secondary Study Name	Age at Death	Sex	Race (choice=White)	Race (choice=Black/ African American)	Race (choice=Asian)	Race (choice=American Indian/ Alaska Native)	Race (choice=Native Hawaiian or Pacific Islander)	Race (choice=Unknown or unreported)	Race (choice=Other)	specify other race	Hispanic/Latino	Highest level of education	Years of education	APOE Genotype	Cognitive Status	Age of onset cognitive symptoms	Age of Dementia diagnosis	Known head injury	Have they had neuroimaging	Consensus Clinical Dx (choice=Alzheimers disease)	Consensus Clinical Dx (choice=Alzheimers Possible/ Probable)	Consensus Clinical Dx (choice=Ataxia)	Consensus Clinical Dx (choice=Corticobasal Degeneration)	Consensus Clinical Dx (choice=Control)	Consensus Clinical Dx (choice=Dementia with Lewy Bodies/ Lewy Body Disease)	Consensus Clinical Dx (choice=Frontotemporal lobar degeneration)	Consensus Clinical Dx (choice=Huntingtons disease)	Consensus Clinical Dx (choice=Motor Neuron disease)	Consensus Clinical Dx (choice=Multiple System Atrophy)	Consensus Clinical Dx (choice=Parkinsons disease)	Consensus Clinical Dx (choice=Parkinsons Cognitive Impairment - no dementia)	Consensus Clinical Dx (choice=Parkinsons Disease Dementia)	Consensus Clinical Dx (choice=Prion)	Consensus Clinical Dx (choice=Progressive Supranuclear Palsy)	Consensus Clinical Dx (choice=Taupathy)	Consensus Clinical Dx (choice=Vascular Dementia)	Consensus Clinical Dx (choice=Unknown)	Consensus Clinical Dx (choice=Other)	If other Consensus dx, describe	Last CASI Score	Interval from last CASI in months	Last MMSE Score	Interval from last MMSE in months	Last MOCA Score	Interval from last MOCA in months	PMI	Rapid Frozen Tissue Type
H21.33.034	ACT		90	Female	Checked	Unchecked	Unchecked	Unchecked	Unchecked	Unchecked	Unchecked		No	Bachelors	16	3/4	Dementia		86		Yes	Unchecked	Unchecked	Unchecked	Unchecked	Unchecked	Unchecked	Unchecked	Unchecked	Unchecked	Unchecked	Unchecked	Unchecked	Unchecked	Unchecked	Unchecked	Unchecked	Unchecked	Checked	Unchecked		66	47.3	18	47.3			10.8	Precision Slices
H21.33.020	ACT		82	Male	Checked	Unchecked	Unchecked	Unchecked	Unchecked	Unchecked	Unchecked		No	Graduate (PhD/Masters)	21	3/3	Dementia	79	81	Yes	Yes	Unchecked	Unchecked	Unchecked	Unchecked	Unchecked	Unchecked	Unchecked	Unchecked	Unchecked	Unchecked	Unchecked	Unchecked	Checked	Unchecked	Unchecked	Unchecked	Unchecked	Unchecked	Unchecked		77	23.8	23	23.8	14	23.9	10.8	Precision Slices
H21.33.033	ACT		83	Female	Checked	Unchecked	Unchecked	Unchecked	Unchecked	Unchecked	Unchecked		No	Trade School/ Tech School	14	3/4	No dementia				Unknown	Unchecked	Unchecked	Unchecked	Unchecked	Checked	Unchecked	Unchecked	Unchecked	Unchecked	Unchecked	Unchecked	Unchecked	Unchecked	Unchecked	Unchecked	Unchecked	Unchecked	Unchecked	Unchecked		96	11.4	27	11.4			8.2	Precision Slices
H20.33.046	ACT	ADRC Clinical Core	94	Male	Checked	Unchecked	Unchecked	Unchecked	Unchecked	Unchecked	Unchecked		No	Professional	21	3/3	Dementia	88	91		Unknown	Checked	Unchecked	Unchecked	Unchecked	Unchecked	Checked	Unchecked	Unchecked	Unchecked	Unchecked	Unchecked	Unchecked	Unchecked	Unchecked	Unchecked	Unchecked	Unchecked	Unchecked	Unchecked		68	37.8	18	1.8	20	41.2	8	Precision Slices
H21.33.008	ACT		91	Female	Checked	Unchecked	Unchecked	Unchecked	Unchecked	Unchecked	Unchecked		No	Bachelors	16	3/3	Dementia	82	83		Unknown	Checked	Unchecked	Unchecked	Unchecked	Unchecked	Unchecked	Unchecked	Unchecked	Unchecked	Unchecked	Unchecked	Unchecked	Unchecked	Unchecked	Unchecked	Unchecked	Unchecked	Unchecked	Unchecked		67	88.3	21	88.3			5	Precision Slices
H21.33.042	ACT		91	Female	Checked	Unchecked	Unchecked	Unchecked	Unchecked	Unchecked	Unchecked		No	Trade School/ Tech School	15	4/4	Dementia	88	89		No	Checked	Unchecked	Unchecked	Unchecked	Unchecked	Unchecked	Unchecked	Unchecked	Unchecked	Unchecked	Unchecked	Unchecked	Unchecked	Unchecked	Unchecked	Unchecked	Unchecked	Unchecked	Unchecked		80	36.9	21	36.9			8.1	Precision Slices
H20.33.038	ACT		90	Female	Checked	Unchecked	Unchecked	Unchecked	Unchecked	Unchecked	Unchecked		No	Graduate (PhD/Masters)	18	3/3	Dementia	85	86		Unknown	Unchecked	Unchecked	Unchecked	Unchecked	Unchecked	Unchecked	Unchecked	Unchecked	Unchecked	Unchecked	Unchecked	Unchecked	Unchecked	Unchecked	Unchecked	Unchecked	Unchecked	Unchecked	Checked		83	39.4	23	39.4			6.2	Precision Slices
H21.33.045	ADRC Clinical Core		94	Female	Unchecked	Unchecked	Checked	Unchecked	Unchecked	Unchecked	Unchecked		No	High School	12	3/4	Dementia	78	78		Unknown	Unchecked	Checked	Unchecked	Unchecked	Unchecked	Unchecked	Unchecked	Unchecked	Unchecked	Unchecked	Unchecked	Unchecked	Unchecked	Unchecked	Unchecked	Unchecked	Unchecked	Unchecked	Unchecked				17	65.3			4	Precision Slices
H21.33.037	ACT		88	Female	Checked	Unchecked	Unchecked	Unchecked	Unchecked	Unchecked	Checked	Mixed	No	Graduate (PhD/Masters)	18	2/3	No dementia				Yes	Unchecked	Unchecked	Unchecked	Unchecked	Checked	Unchecked	Unchecked	Unchecked	Unchecked	Unchecked	Unchecked	Unchecked	Unchecked	Unchecked	Unchecked	Unchecked	Unchecked	Unchecked	Unchecked		96	29.7	26	29.7			6.5	Precision Slices
H21.33.028	ACT		72	Male	Checked	Unchecked	Unchecked	Unchecked	Unchecked	Unchecked	Unchecked		No	Bachelors	16	3/3	No dementia				Yes	Unchecked	Unchecked	Unchecked	Unchecked	Checked	Unchecked	Unchecked	Unchecked	Unchecked	Unchecked	Unchecked	Unchecked	Unchecked	Unchecked	Unchecked	Unchecked	Unchecked	Unchecked	Unchecked		99	22.3	29	22.3			8.3	Precision Slices
H21.33.009	ADRC Clinical Core		65	Female	Checked	Unchecked	Unchecked	Unchecked	Unchecked	Unchecked	Unchecked		No	Bachelors	16	4/4	Dementia	53	53	No	Unknown	Checked	Unchecked	Unchecked	Unchecked	Unchecked	Unchecked	Unchecked	Unchecked	Unchecked	Unchecked	Unchecked	Unchecked	Unchecked	Unchecked	Unchecked	Unchecked	Unchecked	Unchecked	Unchecked				11	73.2			6.2	Precision Slices
H21.33.017	ACT		92	Female	Checked	Unchecked	Unchecked	Unchecked	Unchecked	Unchecked	Unchecked		No	Bachelors	16	3/3	Dementia	90	92	No	Yes	Unchecked	Checked	Unchecked	Unchecked	Unchecked	Unchecked	Unchecked	Unchecked	Unchecked	Unchecked	Unchecked	Unchecked	Unchecked	Unchecked	Unchecked	Unchecked	Unchecked	Unchecked	Unchecked		78	5.3	19	5.3			3.5	Precision Slices
H21.33.036	ACT		93	Female	Checked	Unchecked	Unchecked	Unchecked	Unchecked	Unchecked	Unchecked		No	Trade School/ Tech School	14	3/3	No dementia			No	No	Unchecked	Unchecked	Unchecked	Unchecked	Checked	Unchecked	Unchecked	Unchecked	Unchecked	Unchecked	Unchecked	Unchecked	Unchecked	Unchecked	Unchecked	Unchecked	Unchecked	Unchecked	Unchecked		84	27.5	21	27.5			4	Precision Slices
H21.33.016	ACT		94	Female	Checked	Unchecked	Unchecked	Unchecked	Unchecked	Unchecked	Unchecked		No	Graduate (PhD/Masters)	21	3/3	Dementia	92	93	Yes	Yes	Unchecked	Unchecked	Unchecked	Unchecked	Unchecked	Unchecked	Unchecked	Unchecked	Unchecked	Unchecked	Unchecked	Unchecked	Unchecked	Unchecked	Unchecked	Unchecked	Unchecked	Unchecked	Checked	dementia related to subdural, has Parkinsonian features	80	10.3	22	10.3	16	22.1	5.5	Precision Slices
H21.33.029	ACT		89	Male	Checked	Unchecked	Unchecked	Unchecked	Unchecked	Unchecked	Unchecked		No	Graduate (PhD/Masters)	18	2/4	Dementia	82	83		Yes	Checked	Unchecked	Unchecked	Unchecked	Unchecked	Unchecked	Unchecked	Unchecked	Unchecked	Unchecked	Unchecked	Unchecked	Unchecked	Unchecked	Unchecked	Unchecked	Unchecked	Unchecked	Unchecked		88	78.5	26	78.5			11.0333	Precision Slices
H21.33.039	ACT		88	Female	Checked	Unchecked	Unchecked	Unchecked	Unchecked	Unchecked	Unchecked		No	High School	13	3/3	Dementia	84	86		Yes	Checked	Unchecked	Unchecked	Unchecked	Unchecked	Unchecked	Unchecked	Unchecked	Unchecked	Unchecked	Unchecked	Unchecked	Unchecked	Unchecked	Unchecked	Unchecked	Unchecked	Unchecked	Unchecked		70	35.1	20	35.1			6.5	Precision Slices
H21.33.038	ACT		84	Female	Checked	Unchecked	Unchecked	Unchecked	Unchecked	Unchecked	Unchecked		No	High School	15	3/3	No dementia				Unknown	Unchecked	Unchecked	Unchecked	Unchecked	Checked	Unchecked	Unchecked	Unchecked	Unchecked	Unchecked	Unchecked	Unchecked	Unchecked	Unchecked	Unchecked	Unchecked	Unchecked	Unchecked	Unchecked		97	21.2	27	21.2			11	Precision Slices
H21.33.043	ACT		95	Female	Checked	Unchecked	Unchecked	Unchecked	Unchecked	Unchecked	Unchecked		No	Bachelors	16	3/3	Dementia	93	94		Yes	Unchecked	Unchecked	Unchecked	Unchecked	Unchecked	Unchecked	Unchecked	Unchecked	Unchecked	Unchecked	Unchecked	Unchecked	Unchecked	Unchecked	Unchecked	Unchecked	Unchecked	Checked	Unchecked		97	35.1	29	35.1			4.4	Precision Slices
H21.33.046	ACT		97	Male	Checked	Unchecked	Unchecked	Unchecked	Unchecked	Unchecked	Unchecked		No	Professional	17	3/3	Dementia	94	94		Unknown	Checked	Unchecked	Unchecked	Unchecked	Unchecked	Unchecked	Unchecked	Unchecked	Unchecked	Unchecked	Unchecked	Unchecked	Unchecked	Unchecked	Unchecked	Unchecked	Unchecked	Unchecked	Unchecked		81	22.3	22	22.3			7	Precision Slices
H21.33.040	ACT	ADRC Clinical Core	83	Male	Checked	Unchecked	Unchecked	Unchecked	Unchecked	Unchecked	Unchecked		No	Bachelors	17	3/4	No dementia				Yes	Unchecked	Unchecked	Unchecked	Unchecked	Checked	Unchecked	Unchecked	Unchecked	Unchecked	Unchecked	Unchecked	Unchecked	Unchecked	Unchecked	Unchecked	Unchecked	Unchecked	Unchecked	Unchecked		91	22	22	22	23	36.1	5.6	Precision Slices
H21.33.005	ACT		95	Male	Checked	Unchecked	Unchecked	Unchecked	Unchecked	Unchecked	Unchecked		No	Bachelors	16	3/3	Dementia	89	91		Unknown	Checked	Unchecked	Unchecked	Unchecked	Unchecked	Unchecked	Unchecked	Unchecked	Unchecked	Unchecked	Unchecked	Unchecked	Unchecked	Unchecked	Unchecked	Unchecked	Unchecked	Unchecked	Unchecked		98	86.6	30	86.6			10.2	Precision Slices
H21.33.010	ACT		93	Female	Checked	Unchecked	Unchecked	Unchecked	Unchecked	Unchecked	Unchecked		No	High School	13	3/3	Dementia	88	89	No	Yes	Unchecked	Checked	Unchecked	Unchecked	Unchecked	Unchecked	Unchecked	Unchecked	Unchecked	Unchecked	Unchecked	Unchecked	Unchecked	Unchecked	Unchecked	Unchecked	Checked	Unchecked	Unchecked		87	55.6	27	55.6			9.6	Precision Slices
H21.33.041	ACT		98	Female	Checked	Unchecked	Unchecked	Unchecked	Unchecked	Unchecked	Unchecked		No	High School	12	2/3	No dementia				Unknown	Unchecked	Unchecked	Unchecked	Unchecked	Checked	Unchecked	Unchecked	Unchecked	Unchecked	Unchecked	Unchecked	Unchecked	Unchecked	Unchecked	Unchecked	Unchecked	Unchecked	Unchecked	Unchecked		98	28.2	29	28.2			7.5	Precision Slices
H20.33.004	ACT		86	Male	Checked	Unchecked	Unchecked	Unchecked	Unchecked	Unchecked	Unchecked		No	Trade School/ Tech School	15	3/4	Dementia	80	81	No	Yes	Checked	Unchecked	Unchecked	Unchecked	Unchecked	Unchecked	Unchecked	Unchecked	Unchecked	Unchecked	Unchecked	Unchecked	Unchecked	Unchecked	Unchecked	Unchecked	Unchecked	Unchecked	Unchecked		80	55.7	25	55.7			8.83333	Precision Slices
H20.33.002	ACT		97	Female	Checked	Unchecked	Unchecked	Unchecked	Unchecked	Unchecked	Unchecked		No	High School	12	2/3	No dementia				Unknown	Unchecked	Unchecked	Unchecked	Unchecked	Checked	Unchecked	Unchecked	Unchecked	Unchecked	Unchecked	Unchecked	Unchecked	Unchecked	Unchecked	Unchecked	Unchecked	Unchecked	Unchecked	Unchecked		93	46.1	33	22.6			4.33333	Precision Slices
H20.33.028	ACT	ADRC Clinical Core	94	Female	Checked	Unchecked	Unchecked	Unchecked	Unchecked	Unchecked	Unchecked		No	Trade School/ Tech School	12	3/3	Dementia	92	94		Unknown	Checked	Unchecked	Unchecked	Unchecked	Unchecked	Unchecked	Unchecked	Unchecked	Unchecked	Unchecked	Unchecked	Unchecked	Unchecked	Unchecked	Unchecked	Unchecked	Unchecked	Unchecked	Unchecked		75	12	22	12	21	39.5	7.4	Precision Slices
H20.33.033	ADRC Clinical Core		68	Male	Checked	Unchecked	Unchecked	Unchecked	Unchecked	Unchecked	Unchecked		No	Graduate (PhD/Masters)	18	3/3	Dementia	54	60	Yes	Yes	Unchecked	Checked	Unchecked	Unchecked	Unchecked	Unchecked	Unchecked	Unchecked	Unchecked	Unchecked	Unchecked	Unchecked	Unchecked	Unchecked	Unchecked	Unchecked	Unchecked	Unchecked	Unchecked				25	65.8	7	51.3	6.5	Precision Slices
H21.33.027	ACT		92	Male	Checked	Unchecked	Unchecked	Unchecked	Unchecked	Unchecked	Unchecked		No	Graduate (PhD/Masters)	18	3/4	Dementia				Yes	Checked	Unchecked	Unchecked	Unchecked	Unchecked	Unchecked	Unchecked	Unchecked	Unchecked	Unchecked	Unchecked	Unchecked	Unchecked	Unchecked	Unchecked	Unchecked	Unchecked	Unchecked	Unchecked		71	28.2	22	28.2			6.3	Precision Slices
H21.33.022	ACT	ADRC Clinical Core	82	Female	Checked	Unchecked	Unchecked	Unchecked	Unchecked	Unchecked	Unchecked		No	High School	12	3/3	No dementia				Yes	Unchecked	Unchecked	Unchecked	Unchecked	Unchecked	Unchecked	Unchecked	Unchecked	Unchecked	Unchecked	Unchecked	Unchecked	Unchecked	Unchecked	Unchecked	Unchecked	Unchecked	Checked	Unchecked		97	8.6	30	8.6	25	10.1	4.83333	Precision Slices
H21.33.032	ADRC Clinical Core		98	Female	Checked	Unchecked	Unchecked	Unchecked	Unchecked	Unchecked	Unchecked		No	Bachelors	16	3/3	No dementia			No	Unknown	Unchecked	Unchecked	Unchecked	Unchecked	Checked	Unchecked	Unchecked	Unchecked	Unchecked	Unchecked	Unchecked	Unchecked	Unchecked	Unchecked	Unchecked	Unchecked	Unchecked	Unchecked	Unchecked				30	73.9	21	62.2	5	Precision Slices
H21.33.001	ACT		80	Male	Checked	Unchecked	Unchecked	Unchecked	Unchecked	Unchecked	Unchecked		No	Graduate (PhD/Masters)	21	2/3	Dementia		78		Yes	Unchecked	Unchecked	Unchecked	Unchecked	Unchecked	Unchecked	Unchecked	Unchecked	Unchecked	Unchecked	Unchecked	Unchecked	Unchecked	Unchecked	Unchecked	Unchecked	Unchecked	Unchecked	Checked	brain mets	89	27.7	25	27.7			9.6	Precision Slices
H20.33.045	ADRC Clinical Core		77	Female	Checked	Unchecked	Unchecked	Unchecked	Unchecked	Unchecked	Unchecked		No	Graduate (PhD/Masters)	18	4/4	Dementia	63	65		Unknown	Checked	Unchecked	Unchecked	Unchecked	Unchecked	Unchecked	Unchecked	Unchecked	Unchecked	Unchecked	Unchecked	Unchecked	Unchecked	Unchecked	Unchecked	Unchecked	Unchecked	Unchecked	Checked				6	88.8			3.3	Precision Slices
H21.33.035	ACT		97	Female	Checked	Unchecked	Unchecked	Unchecked	Unchecked	Unchecked	Unchecked		No	High School	14	3/3	No dementia				Yes	Unchecked	Unchecked	Unchecked	Unchecked	Checked	Unchecked	Unchecked	Unchecked	Unchecked	Unchecked	Unchecked	Unchecked	Unchecked	Unchecked	Unchecked	Unchecked	Unchecked	Unchecked	Unchecked		97	30	27	30			4.8	Precision Slices
H19.33.004	ACT		80	Female	Checked	Unchecked	Unchecked	Unchecked	Unchecked	Unchecked	Unchecked		No	Bachelors	17	3/3	No dementia				Unknown	Unchecked	Unchecked	Unchecked	Unchecked	Checked	Unchecked	Unchecked	Unchecked	Unchecked	Unchecked	Unchecked	Unchecked	Unchecked	Unchecked	Unchecked	Unchecked	Unchecked	Unchecked	Unchecked		85	3.5	25	3.5			8.13333	Precision Slices
H21.33.007	ACT		86	Female	Checked	Unchecked	Unchecked	Unchecked	Unchecked	Unchecked	Unchecked		No	Professional	21	3/3	Dementia	80	84	No	Unknown	Checked	Unchecked	Unchecked	Unchecked	Unchecked	Unchecked	Unchecked	Unchecked	Unchecked	Unchecked	Unchecked	Unchecked	Unchecked	Unchecked	Unchecked	Unchecked	Unchecked	Unchecked	Unchecked		86	41.3	26	41.3			5.6	Precision Slices
H20.33.005	ACT		99	Female	Checked	Unchecked	Unchecked	Unchecked	Unchecked	Unchecked	Unchecked		No	High School	12	2/3	No dementia				Unknown	Unchecked	Unchecked	Unchecked	Unchecked	Checked	Unchecked	Unchecked	Unchecked	Unchecked	Unchecked	Unchecked	Unchecked	Unchecked	Unchecked	Unchecked	Unchecked	Unchecked	Unchecked	Unchecked		94	24.2	29	24.2			7.6	Precision Slices
H20.33.041	ACT		91	Female	Checked	Unchecked	Unchecked	Unchecked	Unchecked	Unchecked	Unchecked		No	Bachelors	18	3/3	Dementia				Yes	Unchecked	Unchecked	Unchecked	Unchecked	Unchecked	Unchecked	Unchecked	Unchecked	Unchecked	Unchecked	Unchecked	Unchecked	Unchecked	Unchecked	Unchecked	Unchecked	Unchecked	Checked	Unchecked		86	61.7	25	61.7			5.91667	Precision Slices
H21.33.031	ADRC Clinical Core		84	Male	Checked	Unchecked	Unchecked	Unchecked	Unchecked	Unchecked	Unchecked		No	Graduate (PhD/Masters)	18	3/4	Dementia	72		No	Unknown	Unchecked	Checked	Unchecked	Unchecked	Unchecked	Unchecked	Unchecked	Unchecked	Unchecked	Unchecked	Unchecked	Unchecked	Unchecked	Unchecked	Unchecked	Unchecked	Unchecked	Unchecked	Unchecked				27	86.7	16	33.4	8.9	Precision Slices
H20.33.015	ACT		88	Male	Checked	Unchecked	Unchecked	Unchecked	Unchecked	Unchecked	Unchecked		No	Graduate (PhD/Masters)	18	3/3	Dementia	83	84	Yes	Yes	Checked	Checked	Unchecked	Unchecked	Unchecked	Unchecked	Unchecked	Unchecked	Unchecked	Unchecked	Unchecked	Unchecked	Unchecked	Unchecked	Unchecked	Unchecked	Unchecked	Unchecked	Unchecked		88	48	27	48			11.4167	Precision Slices
H21.33.012	ACT		93	Female	Checked	Unchecked	Unchecked	Unchecked	Unchecked	Unchecked	Unchecked		No	Graduate (PhD/Masters)	21	2/4	Dementia	88	90		No	Unchecked	Unchecked	Unchecked	Unchecked	Unchecked	Unchecked	Unchecked	Unchecked	Unchecked	Checked	Unchecked	Unchecked	Unchecked	Unchecked	Unchecked	Unchecked	Unchecked	Unchecked	Checked		98	66.2	30	66.2			5	Precision Slices
H20.33.001	ACT		82	Male	Checked	Unchecked	Unchecked	Unchecked	Unchecked	Unchecked	Unchecked		No	Bachelors	16	3/3	No dementia				Yes	Unchecked	Unchecked	Unchecked	Unchecked	Checked	Unchecked	Unchecked	Unchecked	Unchecked	Unchecked	Unchecked	Unchecked	Unchecked	Unchecked	Unchecked	Unchecked	Unchecked	Unchecked	Unchecked		97	18.2	28	18.2			7.7	Precision Slices
H20.33.036	ADRC Clinical Core		100	Female	Checked	Unchecked	Unchecked	Unchecked	Unchecked	Unchecked	Unchecked		No	Trade School/ Tech School	15	2/3	No dementia	94		No	Unknown	Unchecked	Unchecked	Unchecked	Unchecked	Unchecked	Unchecked	Unchecked	Unchecked	Unchecked	Unchecked	Unchecked	Unchecked	Unchecked	Unchecked	Unchecked	Unchecked	Unchecked	Unchecked	Checked	MCI multidomain (amnestic, language, attention, executive, visuospatial)			29	104.4			10.6	Precision Slices
H20.33.037	ACT		96	Female	Checked	Unchecked	Unchecked	Unchecked	Unchecked	Unchecked	Unchecked		No	Graduate (PhD/Masters)	20	3/3	Dementia	92	94		No	Checked	Unchecked	Unchecked	Unchecked	Unchecked	Unchecked	Unchecked	Unchecked	Unchecked	Unchecked	Unchecked	Unchecked	Unchecked	Unchecked	Unchecked	Unchecked	Unchecked	Unchecked	Unchecked		70	27.7	18	27.7			10	Precision Slices
H21.33.006	ACT		97	Male	Checked	Unchecked	Unchecked	Unchecked	Unchecked	Unchecked	Unchecked		No	Bachelors	16	3/4	No dementia				Unknown	Unchecked	Unchecked	Unchecked	Unchecked	Unchecked	Unchecked	Unchecked	Unchecked	Unchecked	Unchecked	Unchecked	Unchecked	Unchecked	Unchecked	Unchecked	Unchecked	Unchecked	Unchecked	Checked	Declining cognitive abilities	88	53.9	24	53.9			9.8	Precision Slices
H21.33.044	ACT		88	Female	Checked	Unchecked	Unchecked	Unchecked	Unchecked	Unchecked	Unchecked		No	Trade School/ Tech School	15	3/3	Dementia	87	88	Yes	Yes	Checked	Unchecked	Unchecked	Unchecked	Unchecked	Unchecked	Unchecked	Unchecked	Unchecked	Unchecked	Unchecked	Unchecked	Unchecked	Unchecked	Unchecked	Unchecked	Unchecked	Unchecked	Unchecked		81	8.9	21	8.9			7	Precision Slices
H20.33.019	ACT		87	Female	Checked	Unchecked	Unchecked	Unchecked	Unchecked	Unchecked	Unchecked		No	Trade School/ Tech School	15	3/4	No dementia				Yes	Unchecked	Unchecked	Unchecked	Unchecked	Checked	Unchecked	Unchecked	Unchecked	Unchecked	Unchecked	Unchecked	Unchecked	Unchecked	Unchecked	Unchecked	Unchecked	Unchecked	Unchecked	Unchecked		98	22.5	30	22.5			11.1	Precision Slices
H20.33.030	ACT		86	Female	Checked	Unchecked	Unchecked	Unchecked	Unchecked	Unchecked	Unchecked		No	Bachelors	16	3/4	No dementia				Yes	Unchecked	Unchecked	Unchecked	Unchecked	Unchecked	Unchecked	Unchecked	Unchecked	Unchecked	Unchecked	Unchecked	Unchecked	Unchecked	Unchecked	Unchecked	Unchecked	Unchecked	Checked	Unchecked		74	0.7	25	22.8			6	Precision Slices
H20.33.014	ADRC Clinical Core		82	Female	Checked	Unchecked	Unchecked	Unchecked	Unchecked	Unchecked	Unchecked		No	Graduate (PhD/Masters)	16	3/3	No dementia				Unknown	Unchecked	Unchecked	Unchecked	Unchecked	Checked	Unchecked	Unchecked	Unchecked	Unchecked	Unchecked	Unchecked	Unchecked	Unchecked	Unchecked	Unchecked	Unchecked	Unchecked	Unchecked	Unchecked						25	15.8	7.4	Precision Slices
H21.33.026	ADRC Clinical Core		90	Female	Checked	Unchecked	Unchecked	Unchecked	Unchecked	Unchecked	Unchecked		No	Bachelors	16	3/4	No dementia			No	Unknown	Unchecked	Unchecked	Unchecked	Unchecked	Checked	Unchecked	Unchecked	Unchecked	Unchecked	Unchecked	Unchecked	Unchecked	Unchecked	Unchecked	Unchecked	Unchecked	Unchecked	Unchecked	Unchecked				30	91.2			4.1	Precision Slices
H21.33.030	ACT		89	Male	Checked	Unchecked	Unchecked	Unchecked	Unchecked	Unchecked	Unchecked		No	Bachelors	17	3/4	No dementia				Yes	Unchecked	Unchecked	Unchecked	Unchecked	Checked	Unchecked	Unchecked	Unchecked	Unchecked	Unchecked	Unchecked	Unchecked	Unchecked	Unchecked	Unchecked	Unchecked	Unchecked	Unchecked	Unchecked		99	127.2	27	55.2			5.5	Precision Slices
H20.33.008	ACT		92	Female	Checked	Unchecked	Unchecked	Unchecked	Unchecked	Unchecked	Unchecked		No	Graduate (PhD/Masters)	18	3/4	No dementia				Unknown	Unchecked	Unchecked	Unchecked	Unchecked	Checked	Unchecked	Unchecked	Unchecked	Unchecked	Unchecked	Unchecked	Unchecked	Unchecked	Unchecked	Unchecked	Unchecked	Unchecked	Unchecked	Unchecked		92	2.7	29	2.7			7	Precision Slices
H21.33.047	ACT		90	Male	Checked	Unchecked	Unchecked	Unchecked	Unchecked	Unchecked	Unchecked		No	Professional	21	3/3	No dementia				Unknown	Unchecked	Unchecked	Unchecked	Unchecked	Checked	Unchecked	Unchecked	Unchecked	Unchecked	Unchecked	Unchecked	Unchecked	Unchecked	Unchecked	Unchecked	Unchecked	Unchecked	Unchecked	Unchecked		90	7.4	26	7.4			4.4	Precision Slices
H20.33.012	ACT		91	Female	Checked	Unchecked	Unchecked	Unchecked	Unchecked	Unchecked	Unchecked		No	Graduate (PhD/Masters)	18	3/3	No dementia				Unknown	Unchecked	Unchecked	Unchecked	Unchecked	Checked	Unchecked	Unchecked	Unchecked	Unchecked	Unchecked	Unchecked	Unchecked	Unchecked	Unchecked	Unchecked	Unchecked	Unchecked	Unchecked	Unchecked		98	21.8	29	21.8			7.71667	Precision Slices
H20.33.016	ADRC Clinical Core		93	Female	Checked	Unchecked	Unchecked	Unchecked	Unchecked	Unchecked	Unchecked		No	Trade School/ Tech School	14	2/3	Dementia	84	84		Unknown	Unchecked	Checked	Unchecked	Unchecked	Unchecked	Unchecked	Unchecked	Unchecked	Unchecked	Unchecked	Unchecked	Unchecked	Unchecked	Unchecked	Unchecked	Unchecked	Unchecked	Unchecked	Unchecked				25	83.7			7.73333	Precision Slices
H20.33.017	ADRC Clinical Core		69	Male	Checked	Unchecked	Unchecked	Unchecked	Unchecked	Unchecked	Unchecked		No	Trade School/ Tech School	14	3/3	Dementia	64	67	No	Unknown	Checked	Unchecked	Unchecked	Unchecked	Unchecked	Unchecked	Unchecked	Unchecked	Unchecked	Unchecked	Unchecked	Unchecked	Unchecked	Unchecked	Unchecked	Unchecked	Unchecked	Unchecked	Checked	EOAD							5.5	Precision Slices
H21.33.015	ACT	SLS	98	Male	Checked	Unchecked	Unchecked	Unchecked	Unchecked	Unchecked	Unchecked		No	High School	12	3/3	No dementia				Yes	Unchecked	Unchecked	Unchecked	Unchecked	Checked	Unchecked	Unchecked	Unchecked	Unchecked	Unchecked	Unchecked	Unchecked	Unchecked	Unchecked	Unchecked	Unchecked	Unchecked	Unchecked	Unchecked		84	14.7	24	14.7			4.1	Precision Slices
H20.33.031	ACT		87	Female	Checked	Unchecked	Unchecked	Unchecked	Unchecked	Unchecked	Unchecked		No	High School	12	3/3	Dementia	84	86	Yes	Yes	Checked	Unchecked	Unchecked	Unchecked	Unchecked	Unchecked	Unchecked	Unchecked	Unchecked	Unchecked	Unchecked	Unchecked	Unchecked	Unchecked	Unchecked	Unchecked	Unchecked	Unchecked	Unchecked		79	22.5	26	22.5			7.91667	Precision Slices
H20.33.027	ACT		99	Female	Checked	Unchecked	Unchecked	Unchecked	Unchecked	Unchecked	Unchecked		No	High School	17	3/3	No dementia				Unknown	Unchecked	Unchecked	Unchecked	Unchecked	Checked	Unchecked	Unchecked	Unchecked	Unchecked	Unchecked	Unchecked	Unchecked	Unchecked	Unchecked	Unchecked	Unchecked	Unchecked	Unchecked	Unchecked		88	6.7	23	6.7			9.23333	Precision Slices
H21.33.025	ACT		88	Female	Checked	Unchecked	Unchecked	Unchecked	Unchecked	Unchecked	Unchecked		No	Graduate (PhD/Masters)	21	3/3	No dementia				Yes	Unchecked	Unchecked	Unchecked	Unchecked	Unchecked	Unchecked	Unchecked	Unchecked	Unchecked	Unchecked	Unchecked	Unchecked	Unchecked	Unchecked	Unchecked	Unchecked	Unchecked	Checked	Unchecked		94	8.5	29	8.5			8.6	Precision Slices
H20.33.020	ADRC Clinical Core		81	Male	Checked	Unchecked	Unchecked	Unchecked	Unchecked	Unchecked	Unchecked		No	High School	12	4/4	Dementia	64			Unknown	Checked	Unchecked	Unchecked	Unchecked	Unchecked	Unchecked	Unchecked	Unchecked	Unchecked	Unchecked	Unchecked	Unchecked	Unchecked	Unchecked	Unchecked	Unchecked	Unchecked	Unchecked	Unchecked				14	57.6	4	41.2	6.63333	Precision Slices
H20.33.034	ACT		85	Female	Checked	Unchecked	Unchecked	Unchecked	Unchecked	Unchecked	Checked	Mixed	No	Bachelors	16	2/2	No dementia				No	Unchecked	Unchecked	Unchecked	Unchecked	Unchecked	Unchecked	Unchecked	Unchecked	Unchecked	Unchecked	Unchecked	Unchecked	Unchecked	Unchecked	Unchecked	Unchecked	Unchecked	Checked	Unchecked		99	17.5	30	17.5			10.0167	Precision Slices
H20.33.035	ACT		99	Female	Checked	Unchecked	Unchecked	Unchecked	Unchecked	Unchecked	Unchecked		No	Bachelors	16	3/3	No dementia			Yes	Yes	Unchecked	Unchecked	Unchecked	Unchecked	Checked	Unchecked	Unchecked	Unchecked	Unchecked	Unchecked	Unchecked	Unchecked	Unchecked	Unchecked	Unchecked	Unchecked	Unchecked	Unchecked	Unchecked		92	3	24	3			4.6	Precision Slices
H20.33.011	ACT		93	Female	Checked	Unchecked	Unchecked	Unchecked	Unchecked	Unchecked	Unchecked		No	Bachelors	16	3/4	Dementia	87	92		Unknown	Checked	Unchecked	Unchecked	Unchecked	Unchecked	Unchecked	Unchecked	Unchecked	Unchecked	Unchecked	Unchecked	Unchecked	Unchecked	Unchecked	Unchecked	Unchecked	Unchecked	Unchecked	Checked	late onset AD	79	7.8	21	7.8			6	Precision Slices
H21.33.013	ACT		94	Female	Checked	Unchecked	Unchecked	Unchecked	Unchecked	Unchecked	Unchecked		No	Graduate (PhD/Masters)	21	3/4	Dementia	82	84	No	Yes	Unchecked	Unchecked	Unchecked	Unchecked	Unchecked	Unchecked	Unchecked	Unchecked	Unchecked	Unchecked	Unchecked	Unchecked	Unchecked	Unchecked	Unchecked	Unchecked	Unchecked	Unchecked	Checked	dementia due to multiple etiologies	80	117.6	23	117.6			7.3	Precision Slices
H20.33.013	ACT		94	Male	Checked	Unchecked	Unchecked	Unchecked	Unchecked	Unchecked	Unchecked		No	Trade School/ Tech School	14	3/3	No dementia			No	Unknown	Unchecked	Unchecked	Unchecked	Unchecked	Checked	Unchecked	Unchecked	Unchecked	Unchecked	Unchecked	Unchecked	Unchecked	Unchecked	Unchecked	Unchecked	Unchecked	Unchecked	Unchecked	Unchecked		93	18.6	25	18.6			4.5	Precision Slices
H20.33.040	ACT	SLS	98	Male	Checked	Unchecked	Unchecked	Unchecked	Unchecked	Unchecked	Unchecked		No	Trade School/ Tech School	13	3/3	Dementia				Yes	Unchecked	Checked	Unchecked	Unchecked	Unchecked	Unchecked	Unchecked	Unchecked	Unchecked	Unchecked	Unchecked	Unchecked	Unchecked	Unchecked	Unchecked	Unchecked	Unchecked	Unchecked	Unchecked		93	25.8	27	25.8			5.03	Precision Slices
H21.33.004	ACT		93	Male	Checked	Unchecked	Unchecked	Unchecked	Unchecked	Unchecked	Unchecked		No	Graduate (PhD/Masters)	18	2/3	No dementia				Yes	Unchecked	Unchecked	Unchecked	Unchecked	Checked	Unchecked	Unchecked	Unchecked	Unchecked	Unchecked	Unchecked	Unchecked	Unchecked	Unchecked	Unchecked	Unchecked	Unchecked	Unchecked	Unchecked		89	14.5	27	14.5			5	Precision Slices
H21.33.002	ADRC Clinical Core		70	Female	Checked	Unchecked	Unchecked	Unchecked	Unchecked	Unchecked	Unchecked		No	Graduate (PhD/Masters)	18	3/4	Dementia	61	65		Yes	Unchecked	Checked	Unchecked	Unchecked	Unchecked	Unchecked	Unchecked	Unchecked	Unchecked	Unchecked	Unchecked	Unchecked	Unchecked	Unchecked	Unchecked	Unchecked	Unchecked	Unchecked	Unchecked						17	45.1	3.2	Precision Slices
H20.33.044	ACT		81	Male	Checked	Unchecked	Unchecked	Unchecked	Unchecked	Unchecked	Unchecked		No	Graduate (PhD/Masters)	19	2/3	No dementia				Unknown	Unchecked	Unchecked	Unchecked	Unchecked	Checked	Unchecked	Unchecked	Unchecked	Unchecked	Unchecked	Unchecked	Unchecked	Unchecked	Unchecked	Unchecked	Unchecked	Unchecked	Unchecked	Checked	Note in 2018 OPCA vs MSA?	88	39.5	24	39.5			4.7	Precision Slices
H21.33.018	ACT		89	Female	Checked	Unchecked	Unchecked	Unchecked	Unchecked	Unchecked	Unchecked		No	Graduate (PhD/Masters)	20	3/3	Dementia	86	89		Yes	Unchecked	Unchecked	Unchecked	Unchecked	Unchecked	Unchecked	Unchecked	Unchecked	Unchecked	Unchecked	Unchecked	Unchecked	Unchecked	Unchecked	Unchecked	Unchecked	Unchecked	Checked	Unchecked		92	48.6	23	48.6			10.2333	Precision Slices
H21.33.023	ACT		102	Male	Checked	Unchecked	Unchecked	Unchecked	Unchecked	Unchecked	Unchecked		No	High School	12	3/3	No dementia			Yes	Yes	Unchecked	Unchecked	Unchecked	Unchecked	Checked	Unchecked	Unchecked	Unchecked	Unchecked	Unchecked	Unchecked	Unchecked	Unchecked	Unchecked	Unchecked	Unchecked	Unchecked	Unchecked	Unchecked		86	47.9	24	47.9	19	14.9	7.83333	Precision Slices
H21.33.011	ACT		83	Female	Checked	Unchecked	Unchecked	Unchecked	Unchecked	Unchecked	Unchecked		No	Bachelors	17	3/3	No dementia			No	Yes	Unchecked	Unchecked	Unchecked	Unchecked	Unchecked	Unchecked	Unchecked	Unchecked	Unchecked	Unchecked	Unchecked	Unchecked	Unchecked	Unchecked	Unchecked	Unchecked	Unchecked	Checked	Unchecked		91	18.2	25	18.2			3.6	Precision Slices
H20.33.043	ACT		85	Male	Checked	Unchecked	Unchecked	Unchecked	Unchecked	Unchecked	Unchecked		No	Graduate (PhD/Masters)	20	4/4	No dementia			No	No	Unchecked	Unchecked	Unchecked	Unchecked	Unchecked	Unchecked	Unchecked	Unchecked	Unchecked	Unchecked	Unchecked	Unchecked	Unchecked	Unchecked	Unchecked	Unchecked	Unchecked	Checked	Unchecked		95	14.8	26	14.8			4.5	Precision Slices
H21.33.021	ACT		99	Male	Checked	Unchecked	Unchecked	Unchecked	Unchecked	Unchecked	Unchecked		No	Trade School/ Tech School	14	3/3	Dementia	93	97		Yes	Unchecked	Unchecked	Unchecked	Unchecked	Unchecked	Unchecked	Unchecked	Unchecked	Unchecked	Unchecked	Unchecked	Unchecked	Unchecked	Unchecked	Unchecked	Unchecked	Unchecked	Unchecked	Checked	dementia due to multiple etiologies	86	37.3	24	37.3			6.9	Precision Slices
H20.33.025	ACT		94	Male	Checked	Unchecked	Unchecked	Unchecked	Unchecked	Unchecked	Unchecked		No	High School	12	3/3	No dementia			Yes	Unknown	Unchecked	Unchecked	Unchecked	Unchecked	Checked	Unchecked	Unchecked	Unchecked	Unchecked	Unchecked	Unchecked	Unchecked	Unchecked	Unchecked	Unchecked	Unchecked	Unchecked	Unchecked	Unchecked		94	50.2	22	23.8			4.5	Precision Slices
H20.33.029	ACT		91	Female	Unchecked	Unchecked	Checked	Unchecked	Unchecked	Unchecked	Unchecked		No	High School	13	3/3	Dementia	88	89		Unknown	Checked	Unchecked	Unchecked	Unchecked	Unchecked	Unchecked	Unchecked	Unchecked	Unchecked	Unchecked	Unchecked	Unchecked	Unchecked	Unchecked	Unchecked	Unchecked	Unchecked	Unchecked	Unchecked		77	39.9	23	39.9			6.1	Precision Slices
H21.33.019	ACT		75	Male	Checked	Unchecked	Unchecked	Unchecked	Unchecked	Unchecked	Unchecked		No	High School	15	2/3	No dementia			Yes	Yes	Unchecked	Unchecked	Unchecked	Unchecked	Unchecked	Unchecked	Unchecked	Unchecked	Unchecked	Unchecked	Unchecked	Unchecked	Unchecked	Unchecked	Unchecked	Unchecked	Unchecked	Checked	Unchecked		97	2.4	28	2.4			10.0167	Precision Slices
H20.33.032	ACT		98	Male	Checked	Unchecked	Unchecked	Unchecked	Unchecked	Unchecked	Unchecked		No	Bachelors	17	3/3	No dementia				Yes	Unchecked	Unchecked	Unchecked	Unchecked	Checked	Unchecked	Unchecked	Unchecked	Unchecked	Unchecked	Unchecked	Unchecked	Unchecked	Unchecked	Unchecked	Unchecked	Unchecked	Unchecked	Unchecked		91	11.4	27	11.4			6.91667	Precision Slices
H20.33.039	ACT		96	Female	Checked	Unchecked	Unchecked	Unchecked	Unchecked	Unchecked	Unchecked		No	Trade School/ Tech School	14	3/3	No dementia			No	Unknown	Unchecked	Unchecked	Unchecked	Unchecked	Unchecked	Unchecked	Unchecked	Unchecked	Unchecked	Unchecked	Unchecked	Unchecked	Unchecked	Unchecked	Unchecked	Unchecked	Unchecked	Checked	Unchecked		91	3.5	26	3.5	21	11.1	10.3	Precision Slices
H20.33.024	ACT		90	Male	Checked	Unchecked	Unchecked	Unchecked	Unchecked	Unchecked	Unchecked		No	Graduate (PhD/Masters)	19	3/3	No dementia				Unknown	Unchecked	Unchecked	Unchecked	Unchecked	Checked	Unchecked	Unchecked	Unchecked	Unchecked	Unchecked	Unchecked	Unchecked	Unchecked	Unchecked	Unchecked	Unchecked	Unchecked	Unchecked	Unchecked		94	28.4	28	28.4			3.5	Precision Slices
H20.33.026	ADRC Clinical Core		75	Female	Checked	Unchecked	Unchecked	Unchecked	Unchecked	Unchecked	Unchecked		Unknown	High School	12	4/4	Dementia	64			Yes	Checked	Unchecked	Unchecked	Unchecked	Unchecked	Unchecked	Unchecked	Unchecked	Unchecked	Unchecked	Unchecked	Unchecked	Unchecked	Unchecked	Unchecked	Unchecked	Unchecked	Unchecked	Unchecked								7	Precision Slices
H20.33.018	ACT		81	Female	Checked	Unchecked	Unchecked	Checked	Unchecked	Unchecked	Checked	Mixed	Yes	Graduate (PhD/Masters)	21	3/4	Dementia	71	74		Unknown	Checked	Unchecked	Unchecked	Unchecked	Unchecked	Unchecked	Unchecked	Unchecked	Unchecked	Unchecked	Unchecked	Unchecked	Unchecked	Unchecked	Unchecked	Unchecked	Unchecked	Unchecked	Checked		71	81	21	81			4.5	Precision Slices
H21.33.014	ADRC Clinical Core		92	Male	Checked	Unchecked	Unchecked	Unchecked	Unchecked	Unchecked	Unchecked		No	Trade School/ Tech School	15	2/3	No dementia				Unknown	Unchecked	Unchecked	Unchecked	Unchecked	Checked	Unchecked	Unchecked	Unchecked	Unchecked	Unchecked	Unchecked	Unchecked	Unchecked	Unchecked	Unchecked	Unchecked	Unchecked	Unchecked	Unchecked				28	68.1	25	15.2	9.5	Precision Slices
H21.33.003	ACT		78	Male	Unchecked	Unchecked	Checked	Unchecked	Unchecked	Unchecked	Unchecked		No	Bachelors	16	3/3	No dementia			No	Yes	Unchecked	Unchecked	Unchecked	Unchecked	Checked	Unchecked	Unchecked	Unchecked	Unchecked	Unchecked	Unchecked	Unchecked	Unchecked	Unchecked	Unchecked	Unchecked	Unchecked	Unchecked	Unchecked		95	18.6	27	18.6			10	Precision Slices
[truncated: 15 more columns]

## Sheet: TableS1_legend
Supplemental Table S1: Supplemental_Table_S1.xlsx Metadata information for 84 donors profiled by snRNA-seq and snATAC-seq, including such as age at death, sex, cognitive status, and overall AD neuropathological change (ADNC). Data were obtained from the SEA-AD consortium (https://brain-map.org/consortia/sea-ad/our-data).
