# Supplementary material for: Cell type–specific gene regulatory atlas prioritizes drug targets and repurposable medicines in Alzheimer's disease
Source: HighWire-hosted journal article supplement (doi:10.1101/gr.280436.125), 2026-01-21
Supplement: Supplemental_Table_S2.xlsx [file Supplemental_Table_S2.xlsx]

## Sheet: Supplemental_Table_S2
gene	cluster_id	logFC	logCPM	F	p_adj_val	contrast	Comparison	CellType
LINC01128	Ast	0.694097	3.31449	6.84557	0.010631	Low_vs_Not_AD	Low_vs_Not_AD	Ast
SAMD11	Ast	-0.869064	3.18606	4.64074	0.0342488	Low_vs_Not_AD	Low_vs_Not_AD	Ast
AL691432.2	Ast	0.531173	1.60425	6.51581	0.0125783	Low_vs_Not_AD	Low_vs_Not_AD	Ast
AL139246.5	Ast	1.32814	1.44158	10.0707	0.00212439	Low_vs_Not_AD	Low_vs_Not_AD	Ast
ERRFI1	Ast	0.535829	5.34332	5.68123	0.0195235	Low_vs_Not_AD	Low_vs_Not_AD	Ast
SLC2A5	Ast	-1.19917	1.28974	9.57829	0.00266713	Low_vs_Not_AD	Low_vs_Not_AD	Ast
PDPN	Ast	1.0793	2.77938	5.47157	0.0218414	Low_vs_Not_AD	Low_vs_Not_AD	Ast
C1QB	Ast	1.20268	0.158076	5.2019	0.0247239	Low_vs_Not_AD	Low_vs_Not_AD	Ast
MANEAL	Ast	0.543474	0.61861	4.52596	0.0361888	Low_vs_Not_AD	Low_vs_Not_AD	Ast
AC093151.8	Ast	-2.81903	2.11595	8.47346	0.00461045	Low_vs_Not_AD	Low_vs_Not_AD	Ast
SLC2A1	Ast	0.752302	4.36408	5.66486	0.0196956	Low_vs_Not_AD	Low_vs_Not_AD	Ast
TOE1	Ast	-0.536368	1.61714	4.88552	0.0299098	Low_vs_Not_AD	Low_vs_Not_AD	Ast
CCDC163	Ast	0.929812	1.97904	5.25208	0.0245455	Low_vs_Not_AD	Low_vs_Not_AD	Ast
AL445685.1	Ast	-0.828526	-0.326452	5.16329	0.0249965	Low_vs_Not_AD	Low_vs_Not_AD	Ast
MIR4422HG	Ast	0.557594	0.524653	5.72227	0.0188559	Low_vs_Not_AD	Low_vs_Not_AD	Ast
UBE2U	Ast	0.924078	0.00291963	7.20463	0.00850108	Low_vs_Not_AD	Low_vs_Not_AD	Ast
LINC02567	Ast	1.19021	-0.267425	5.48029	0.0210723	Low_vs_Not_AD	Low_vs_Not_AD	Ast
ABCA4	Ast	0.710707	2.24129	4.05907	0.0473173	Low_vs_Not_AD	Low_vs_Not_AD	Ast
COL11A1	Ast	0.610057	5.67482	5.52817	0.0211803	Low_vs_Not_AD	Low_vs_Not_AD	Ast
AL591888.1	Ast	1.7459	0.500273	8.13558	0.00532026	Low_vs_Not_AD	Low_vs_Not_AD	Ast
SLC6A17	Ast	0.618757	1.99465	4.37806	0.0395658	Low_vs_Not_AD	Low_vs_Not_AD	Ast
INKA2-AS1	Ast	0.919404	-0.0576128	4.40976	0.0381589	Low_vs_Not_AD	Low_vs_Not_AD	Ast
AP4B1-AS1	Ast	-0.727969	1.28752	4.97469	0.0284329	Low_vs_Not_AD	Low_vs_Not_AD	Ast
NGF	Ast	1.17504	0.405054	6.56212	0.0120215	Low_vs_Not_AD	Low_vs_Not_AD	Ast
FP700111.1	Ast	0.995656	-0.129124	5.7558	0.0182197	Low_vs_Not_AD	Low_vs_Not_AD	Ast
SRGAP2B	Ast	-0.590594	3.07505	6.45367	0.0130199	Low_vs_Not_AD	Low_vs_Not_AD	Ast
IL6R-AS1	Ast	1.23136	0.781722	7.18032	0.0088069	Low_vs_Not_AD	Low_vs_Not_AD	Ast
MEX3A	Ast	-0.980319	0.957613	6.45994	0.0128619	Low_vs_Not_AD	Low_vs_Not_AD	Ast
TSACC	Ast	-0.780374	0.901206	6.32236	0.0138086	Low_vs_Not_AD	Low_vs_Not_AD	Ast
CRABP2	Ast	1.02239	0.120472	7.0196	0.00941454	Low_vs_Not_AD	Low_vs_Not_AD	Ast
CASQ1	Ast	-0.673222	1.33589	4.4813	0.0373127	Low_vs_Not_AD	Low_vs_Not_AD	Ast
UAP1	Ast	0.828459	4.14866	4.74427	0.0323518	Low_vs_Not_AD	Low_vs_Not_AD	Ast
CD247	Ast	-0.596255	2.61286	5.6993	0.0193489	Low_vs_Not_AD	Low_vs_Not_AD	Ast
KIF14	Ast	-0.527403	0.701481	4.6288	0.0342397	Low_vs_Not_AD	Low_vs_Not_AD	Ast
GPR37L1	Ast	0.564041	6.49763	4.04693	0.0476268	Low_vs_Not_AD	Low_vs_Not_AD	Ast
PPFIA4	Ast	0.631996	4.37809	6.0965	0.0156821	Low_vs_Not_AD	Low_vs_Not_AD	Ast
NUAK2	Ast	-0.926403	1.93099	7.58383	0.00729208	Low_vs_Not_AD	Low_vs_Not_AD	Ast
LAMB3	Ast	-0.705134	0.187074	6.10797	0.0152135	Low_vs_Not_AD	Low_vs_Not_AD	Ast
G0S2	Ast	-2.01368	1.06322	9.90264	0.00225685	Low_vs_Not_AD	Low_vs_Not_AD	Ast
AC096637.1	Ast	1.569	2.47687	4.37406	0.0396435	Low_vs_Not_AD	Low_vs_Not_AD	Ast
WNT9A	Ast	1.79121	0.281989	9.08273	0.00328956	Low_vs_Not_AD	Low_vs_Not_AD	Ast
AL670729.2	Ast	1.73961	0.365216	6.91346	0.00992913	Low_vs_Not_AD	Low_vs_Not_AD	Ast
LINC01354	Ast	0.614331	3.33719	5.12415	0.0263191	Low_vs_Not_AD	Low_vs_Not_AD	Ast
AL356010.2	Ast	0.845686	-0.0770313	5.52823	0.0206355	Low_vs_Not_AD	Low_vs_Not_AD	Ast
AL359764.3	Ast	0.86613	1.73239	8.90171	0.00376989	Low_vs_Not_AD	Low_vs_Not_AD	Ast
AL591686.1	Ast	1.78354	-0.0855032	8.13308	0.00518405	Low_vs_Not_AD	Low_vs_Not_AD	Ast
AC018685.2	Ast	1.12403	0.00994595	10.2866	0.00180528	Low_vs_Not_AD	Low_vs_Not_AD	Ast
AC010096.1	Ast	0.831934	-0.0362174	4.40021	0.0384498	Low_vs_Not_AD	Low_vs_Not_AD	Ast
AC096570.2	Ast	1.21718	0.117937	4.89156	0.0292272	Low_vs_Not_AD	Low_vs_Not_AD	Ast
AC010896.1	Ast	-0.719759	0.357006	5.13764	0.0257472	Low_vs_Not_AD	Low_vs_Not_AD	Ast
AC013472.3	Ast	0.765235	-0.0640007	6.09102	0.0152609	Low_vs_Not_AD	Low_vs_Not_AD	Ast
OST4	Ast	-0.678775	3.2572	4.53232	0.0363548	Low_vs_Not_AD	Low_vs_Not_AD	Ast
C2orf16	Ast	-0.907735	1.87357	4.12301	0.0456179	Low_vs_Not_AD	Low_vs_Not_AD	Ast
LINC01833	Ast	1.47203	-0.231579	4.85556	0.0295757	Low_vs_Not_AD	Low_vs_Not_AD	Ast
STON1-GTF2A1L	Ast	-0.951043	0.747281	4.45904	0.037543	Low_vs_Not_AD	Low_vs_Not_AD	Ast
AC010967.1	Ast	1.35698	1.11002	8.61275	0.00430577	Low_vs_Not_AD	Low_vs_Not_AD	Ast
AC007179.1	Ast	2.21251	0.484688	9.52574	0.00262517	Low_vs_Not_AD	Low_vs_Not_AD	Ast
LINC01828	Ast	-1.08637	-0.34778	5.32578	0.0228361	Low_vs_Not_AD	Low_vs_Not_AD	Ast
HK2	Ast	1.13481	3.24708	4.45799	0.0378772	Low_vs_Not_AD	Low_vs_Not_AD	Ast
AC012494.1	Ast	1.07533	1.16281	13.4687	0.000423888	Low_vs_Not_AD	Low_vs_Not_AD	Ast
TEKT4	Ast	-1.3724	-0.340565	7.27275	0.00805378	Low_vs_Not_AD	Low_vs_Not_AD	Ast
GPAT2	Ast	0.778619	-0.114434	3.99384	0.0482996	Low_vs_Not_AD	Low_vs_Not_AD	Ast
MTLN	Ast	-0.678793	2.83412	6.60343	0.012048	Low_vs_Not_AD	Low_vs_Not_AD	Ast
AC009312.1	Ast	1.02151	-0.360496	6.0018	0.0158063	Low_vs_Not_AD	Low_vs_Not_AD	Ast
C1QL2	Ast	1.13972	1.71845	6.66173	0.0116659	Low_vs_Not_AD	Low_vs_Not_AD	Ast
DARS-AS1	Ast	0.555264	1.29087	4.2947	0.0413808	Low_vs_Not_AD	Low_vs_Not_AD	Ast
NXPH2	Ast	0.680413	0.326767	5.6645	0.0193683	Low_vs_Not_AD	Low_vs_Not_AD	Ast
AC105402.3	Ast	3.50659	3.01136	12.6886	0.000613166	Low_vs_Not_AD	Low_vs_Not_AD	Ast
AC023469.1	Ast	1.97517	3.42054	10.5227	0.0017251	Low_vs_Not_AD	Low_vs_Not_AD	Ast
NR4A2	Ast	1.08199	4.48347	13.1977	0.000494173	Low_vs_Not_AD	Low_vs_Not_AD	Ast
SCN1A-AS1	Ast	-0.854507	3.46387	7.47193	0.0077206	Low_vs_Not_AD	Low_vs_Not_AD	Ast
SCN1A	Ast	-0.667464	4.92219	4.83404	0.0308005	Low_vs_Not_AD	Low_vs_Not_AD	Ast
PDK1	Ast	1.48377	4.35897	14.4694	0.000277814	Low_vs_Not_AD	Low_vs_Not_AD	Ast
RAPGEF4-AS1	Ast	0.948337	1.21364	5.44661	0.0220273	Low_vs_Not_AD	Low_vs_Not_AD	Ast
RAPGEF4	Ast	0.845639	5.19087	8.47986	0.00465484	Low_vs_Not_AD	Low_vs_Not_AD	Ast
AC016737.2	Ast	0.691803	-0.0281279	4.58815	0.0346465	Low_vs_Not_AD	Low_vs_Not_AD	Ast
ITGA4	Ast	1.10399	-0.283794	5.29209	0.0233492	Low_vs_Not_AD	Low_vs_Not_AD	Ast
NEUROD1	Ast	1.09277	0.270198	5.33648	0.0230158	Low_vs_Not_AD	Low_vs_Not_AD	Ast
SLC40A1	Ast	-0.663817	2.07114	8.33827	0.00499595	Low_vs_Not_AD	Low_vs_Not_AD	Ast
NABP1	Ast	0.76923	1.99761	5.15888	0.0258119	Low_vs_Not_AD	Low_vs_Not_AD	Ast
FN1	Ast	0.705884	5.15266	4.33953	0.0404397	Low_vs_Not_AD	Low_vs_Not_AD	Ast
AC009955.4	Ast	-1.2187	0.375601	7.82728	0.00624317	Low_vs_Not_AD	Low_vs_Not_AD	Ast
SNORC	Ast	0.582544	4.63036	5.56767	0.0207404	Low_vs_Not_AD	Low_vs_Not_AD	Ast
COPS9	Ast	-0.629774	4.88164	5.35004	0.0232987	Low_vs_Not_AD	Low_vs_Not_AD	Ast
OTOS	Ast	-1.17353	1.05983	7.5077	0.00748657	Low_vs_Not_AD	Low_vs_Not_AD	Ast
AC066595.2	Ast	-1.55921	-0.655836	4.77489	0.0306877	Low_vs_Not_AD	Low_vs_Not_AD	Ast
AC022007.1	Ast	0.69536	0.89422	6.49426	0.0126173	Low_vs_Not_AD	Low_vs_Not_AD	Ast
LINC00691	Ast	-1.44943	-0.4463	10.6356	0.00145499	Low_vs_Not_AD	Low_vs_Not_AD	Ast
AC092042.4	Ast	0.950212	0.079962	4.92333	0.0288121	Low_vs_Not_AD	Low_vs_Not_AD	Ast
ZMYND10	Ast	-0.795564	0.518162	4.97706	0.0281702	Low_vs_Not_AD	Low_vs_Not_AD	Ast
ERC2-IT1	Ast	-0.860575	-0.113762	4.51171	0.0360593	Low_vs_Not_AD	Low_vs_Not_AD	Ast
LINC00698	Ast	1.28901	-0.0670182	6.28913	0.0137226	Low_vs_Not_AD	Low_vs_Not_AD	Ast
ADAMTS9-AS2	Ast	-0.794902	7.65748	6.37753	0.0135377	Low_vs_Not_AD	Low_vs_Not_AD	Ast
LINC01990	Ast	-0.705438	0.628063	5.4572	0.021736	Low_vs_Not_AD	Low_vs_Not_AD	Ast
GAP43	Ast	1.02813	3.518	7.24302	0.00867352	Low_vs_Not_AD	Low_vs_Not_AD	Ast
AC126182.3	Ast	-0.645663	0.710075	6.28063	0.0140333	Low_vs_Not_AD	Low_vs_Not_AD	Ast
FAM162A	Ast	0.631787	5.58784	7.65729	0.00702528	Low_vs_Not_AD	Low_vs_Not_AD	Ast
AC107027.1	Ast	-0.841678	-0.197799	4.00583	0.0478664	Low_vs_Not_AD	Low_vs_Not_AD	Ast
SPSB4	Ast	-2.3405	0.934231	12.2489	0.000727092	Low_vs_Not_AD	Low_vs_Not_AD	Ast
AC018450.1	Ast	-0.740945	0.9116	4.35144	0.0399826	Low_vs_Not_AD	Low_vs_Not_AD	Ast
PLOD2	Ast	0.601138	7.75414	5.67292	0.0196094	Low_vs_Not_AD	Low_vs_Not_AD	Ast
PTX3	Ast	1.48034	-0.025189	6.94512	0.00964456	Low_vs_Not_AD	Low_vs_Not_AD	Ast
AC078802.1	Ast	-0.993679	-0.119119	7.05474	0.00913547	Low_vs_Not_AD	Low_vs_Not_AD	Ast
LINC02015	Ast	1.43785	-0.208926	5.22287	0.0241247	Low_vs_Not_AD	Low_vs_Not_AD	Ast
KLHL6	Ast	0.713566	-0.0725466	3.97508	0.0488027	Low_vs_Not_AD	Low_vs_Not_AD	Ast
ETV5	Ast	0.915865	4.72557	6.49698	0.0127233	Low_vs_Not_AD	Low_vs_Not_AD	Ast
RPL39L	Ast	-0.558251	2.02453	5.17026	0.0256677	Low_vs_Not_AD	Low_vs_Not_AD	Ast
TPRG1	Ast	0.606311	4.70074	4.98468	0.0283762	Low_vs_Not_AD	Low_vs_Not_AD	Ast
CLDN16	Ast	0.766011	0.343292	5.62489	0.0197539	Low_vs_Not_AD	Low_vs_Not_AD	Ast
TFRC	Ast	0.777437	5.68758	6.13113	0.0153982	Low_vs_Not_AD	Low_vs_Not_AD	Ast
LINC01063	Ast	-0.987226	0.894402	11.8075	0.000913111	Low_vs_Not_AD	Low_vs_Not_AD	Ast
PIGZ	Ast	-0.500117	5.03487	7.30443	0.0084016	Low_vs_Not_AD	Low_vs_Not_AD	Ast
AC024560.1	Ast	-1.34525	0.990524	5.684	0.0193621	Low_vs_Not_AD	Low_vs_Not_AD	Ast
STK32B	Ast	0.514583	1.95447	7.08651	0.00938491	Low_vs_Not_AD	Low_vs_Not_AD	Ast
CLNK	Ast	0.95681	1.67089	5.21222	0.025054	Low_vs_Not_AD	Low_vs_Not_AD	Ast
AC073848.1	Ast	0.850977	0.476843	5.08229	0.0266051	Low_vs_Not_AD	Low_vs_Not_AD	Ast
BST1	Ast	-0.995843	0.444449	7.42204	0.00771536	Low_vs_Not_AD	Low_vs_Not_AD	Ast
AC106894.1	Ast	0.846374	0.28372	8.30377	0.00489906	Low_vs_Not_AD	Low_vs_Not_AD	Ast
AC092440.1	Ast	1.53395	0.206088	8.65053	0.00406014	Low_vs_Not_AD	Low_vs_Not_AD	Ast
AC104072.1	Ast	0.613374	3.11026	4.16184	0.0446644	Low_vs_Not_AD	Low_vs_Not_AD	Ast
LRRC66	Ast	0.734128	2.41501	7.97105	0.00600545	Low_vs_Not_AD	Low_vs_Not_AD	Ast
THEGL	Ast	-0.807668	-0.333146	4.74112	0.0315541	Low_vs_Not_AD	Low_vs_Not_AD	Ast
CXCL3	Ast	-1.147	0.695026	5.06897	0.0267531	Low_vs_Not_AD	Low_vs_Not_AD	Ast
ADH6	Ast	-0.998996	0.11638	4.942	0.0284331	Low_vs_Not_AD	Low_vs_Not_AD	Ast
AF213884.3	Ast	0.802759	0.065336	4.05167	0.0468789	Low_vs_Not_AD	Low_vs_Not_AD	Ast
AC096577.1	Ast	0.582789	0.162632	5.25802	0.0240423	Low_vs_Not_AD	Low_vs_Not_AD	Ast
AC092445.1	Ast	0.942971	2.86815	4.9055	0.0296342	Low_vs_Not_AD	Low_vs_Not_AD	Ast
LINC02516	Ast	1.40239	0.660979	9.31869	0.00300463	Low_vs_Not_AD	Low_vs_Not_AD	Ast
AC104664.1	Ast	0.946164	0.738323	5.08628	0.0265711	Low_vs_Not_AD	Low_vs_Not_AD	Ast
HSPA4L	Ast	-0.606776	5.60546	3.97019	0.0497317	Low_vs_Not_AD	Low_vs_Not_AD	Ast
SLC7A11-AS1	Ast	-0.988568	2.92345	3.9651	0.04989	Low_vs_Not_AD	Low_vs_Not_AD	Ast
DCHS2	Ast	-0.603404	6.81029	5.06172	0.0272139	Low_vs_Not_AD	Low_vs_Not_AD	Ast
AC079226.2	Ast	-1.22263	-0.418251	6.17466	0.0143788	Low_vs_Not_AD	Low_vs_Not_AD	Ast
LINC01060	Ast	-0.652271	0.63045	6.99492	0.00965605	Low_vs_Not_AD	Low_vs_Not_AD	Ast
AC021087.1	Ast	-0.740768	0.0595153	5.9254	0.0167191	Low_vs_Not_AD	Low_vs_Not_AD	Ast
SNHG18	Ast	-1.12346	1.10979	9.43602	0.00287274	Low_vs_Not_AD	Low_vs_Not_AD	Ast
C5orf17	Ast	2.12404	3.94929	9.22686	0.00322453	Low_vs_Not_AD	Low_vs_Not_AD	Ast
AC109472.1	Ast	1.84159	1.10564	9.7995	0.00237326	Low_vs_Not_AD	Low_vs_Not_AD	Ast
LINC02109	Ast	2.74276	0.328383	23.4502	4.37625362175789e-06	Low_vs_Not_AD	Low_vs_Not_AD	Ast
AC010343.3	Ast	0.860352	0.0755084	5.91761	0.016788	Low_vs_Not_AD	Low_vs_Not_AD	Ast
LINC02057	Ast	1.03205	-0.295207	4.86403	0.0295308	Low_vs_Not_AD	Low_vs_Not_AD	Ast
AC010501.2	Ast	-0.744421	0.0103645	3.93655	0.0499715	Low_vs_Not_AD	Low_vs_Not_AD	Ast
LINC01949	Ast	-0.80032	1.35979	4.72097	0.0326735	Low_vs_Not_AD	Low_vs_Not_AD	Ast
NREP	Ast	0.57781	4.63782	7.77372	0.00662537	Low_vs_Not_AD	Low_vs_Not_AD	Ast
LINC02200	Ast	0.835622	0.922839	5.38347	0.0227112	Low_vs_Not_AD	Low_vs_Not_AD	Ast
FEM1C	Ast	0.525937	5.48379	5.08021	0.0269433	Low_vs_Not_AD	Low_vs_Not_AD	Ast
AC106786.1	Ast	-1.50009	-0.507167	4.3876	0.0383014	Low_vs_Not_AD	Low_vs_Not_AD	Ast
FBN2	Ast	-0.886311	0.913023	6.0465	0.015942	Low_vs_Not_AD	Low_vs_Not_AD	Ast
EGR1	Ast	1.87043	0.756827	9.34778	0.00294509	Low_vs_Not_AD	Low_vs_Not_AD	Ast
AC005609.1	Ast	-0.855187	0.288093	5.77245	0.0182322	Low_vs_Not_AD	Low_vs_Not_AD	Ast
PCDHB7	Ast	0.59233	2.30258	4.23749	0.0428108	Low_vs_Not_AD	Low_vs_Not_AD	Ast
ABLIM3	Ast	0.717438	4.81816	5.0723	0.0270598	Low_vs_Not_AD	Low_vs_Not_AD	Ast
CD74	Ast	1.08586	1.57989	5.80234	0.0182436	Low_vs_Not_AD	Low_vs_Not_AD	Ast
LINC02521	Ast	-1.03201	0.274942	5.03744	0.027121	Low_vs_Not_AD	Low_vs_Not_AD	Ast
PPP1R3G	Ast	0.792147	1.56058	5.28134	0.0241621	Low_vs_Not_AD	Low_vs_Not_AD	Ast
ADTRP	Ast	0.934647	-0.240417	6.69483	0.0110182	Low_vs_Not_AD	Low_vs_Not_AD	Ast
EDN1	Ast	0.884562	-0.0235282	7.03959	0.00926948	Low_vs_Not_AD	Low_vs_Not_AD	Ast
AL008729.2	Ast	0.984963	0.281648	10.4655	0.00167672	Low_vs_Not_AD	Low_vs_Not_AD	Ast
AL353759.1	Ast	-0.881051	0.619748	4.06767	0.0467269	Low_vs_Not_AD	Low_vs_Not_AD	Ast
HIST1H4H	Ast	-0.541805	2.05034	4.65836	0.033919	Low_vs_Not_AD	Low_vs_Not_AD	Ast
BTN3A3	Ast	-0.626875	1.50927	4.96101	0.028684	Low_vs_Not_AD	Low_vs_Not_AD	Ast
CDSN	Ast	-1.22635	-0.315185	4.46948	0.0366726	Low_vs_Not_AD	Low_vs_Not_AD	Ast
VEGFA	Ast	0.908777	6.19375	4.82987	0.0308694	Low_vs_Not_AD	Low_vs_Not_AD	Ast
AL109615.3	Ast	1.04977	2.4789	9.5368	0.00277298	Low_vs_Not_AD	Low_vs_Not_AD	Ast
AL109615.2	Ast	0.82034	0.319635	4.68541	0.0329401	Low_vs_Not_AD	Low_vs_Not_AD	Ast
PAQR8	Ast	0.511325	5.3896	4.39885	0.0391291	Low_vs_Not_AD	Low_vs_Not_AD	Ast
AL355612.1	Ast	-0.973543	3.71053	4.07357	0.0469277	Low_vs_Not_AD	Low_vs_Not_AD	Ast
TPBG	Ast	-1.11955	0.319982	8.02033	0.00564934	Low_vs_Not_AD	Low_vs_Not_AD	Ast
SLC22A16	Ast	1.79906	-0.139899	9.12887	0.00314117	Low_vs_Not_AD	Low_vs_Not_AD	Ast
ARHGAP18	Ast	-0.548642	2.7662	4.4969	0.0370721	Low_vs_Not_AD	Low_vs_Not_AD	Ast
AL078590.2	Ast	1.37049	0.881692	9.88877	0.00227562	Low_vs_Not_AD	Low_vs_Not_AD	Ast
MTFR2	Ast	-0.82431	-0.00317654	4.68412	0.0328128	Low_vs_Not_AD	Low_vs_Not_AD	Ast
AL023581.1	Ast	-0.845424	-0.106418	4.07606	0.0460583	Low_vs_Not_AD	Low_vs_Not_AD	Ast
ZC2HC1B	Ast	0.702812	1.03467	4.42007	0.0385356	Low_vs_Not_AD	Low_vs_Not_AD	Ast
HYMAI	Ast	-0.724061	1.47449	4.37987	0.0394718	Low_vs_Not_AD	Low_vs_Not_AD	Ast
AL357992.1	Ast	-1.23414	0.026994	8.62629	0.00410422	Low_vs_Not_AD	Low_vs_Not_AD	Ast
AL031056.2	Ast	-1.00452	0.915481	4.48523	0.0370569	Low_vs_Not_AD	Low_vs_Not_AD	Ast
FBXO5	Ast	-0.837154	0.607553	6.36636	0.0134162	Low_vs_Not_AD	Low_vs_Not_AD	Ast
AL589693.1	Ast	0.651929	3.08016	4.61177	0.0347992	Low_vs_Not_AD	Low_vs_Not_AD	Ast
SYTL3	Ast	0.674886	2.78935	4.50707	0.0368659	Low_vs_Not_AD	Low_vs_Not_AD	Ast
PNLDC1	Ast	-1.1748	0.734407	7.00965	0.00961641	Low_vs_Not_AD	Low_vs_Not_AD	Ast
AL136225.1	Ast	-0.932117	0.205024	6.12799	0.0150515	Low_vs_Not_AD	Low_vs_Not_AD	Ast
AC093627.4	Ast	0.759018	-0.124439	4.28032	0.0410231	Low_vs_Not_AD	Low_vs_Not_AD	Ast
GPR146	Ast	0.669125	2.27592	7.14214	0.00913082	Low_vs_Not_AD	Low_vs_Not_AD	Ast
PSMG3	Ast	-0.568365	1.43027	5.91732	0.0171914	Low_vs_Not_AD	Low_vs_Not_AD	Ast
AC079804.3	Ast	0.753759	-0.153189	5.31299	0.023105	Low_vs_Not_AD	Low_vs_Not_AD	Ast
AC004982.1	Ast	0.621733	1.96438	5.86032	0.0177536	Low_vs_Not_AD	Low_vs_Not_AD	Ast
AC060834.2	Ast	0.935829	0.174712	4.81292	0.0306207	Low_vs_Not_AD	Low_vs_Not_AD	Ast
SCIN	Ast	1.10267	-0.318615	6.04692	0.0154456	Low_vs_Not_AD	Low_vs_Not_AD	Ast
STEAP1B	Ast	0.893873	2.96231	8.16271	0.00545556	Low_vs_Not_AD	Low_vs_Not_AD	Ast
AC003093.1	Ast	-0.818029	1.43138	5.39712	0.0226528	Low_vs_Not_AD	Low_vs_Not_AD	Ast
AC004540.2	Ast	0.667893	2.45892	4.83799	0.0307451	Low_vs_Not_AD	Low_vs_Not_AD	Ast
SKAP2	Ast	-0.606619	4.34343	5.44027	0.0222009	Low_vs_Not_AD	Low_vs_Not_AD	Ast
AC007255.1	Ast	0.942854	2.28253	5.13525	0.0261576	Low_vs_Not_AD	Low_vs_Not_AD	Ast
PDE1C	Ast	-0.979182	4.87804	7.2562	0.00861079	Low_vs_Not_AD	Low_vs_Not_AD	Ast
NACAD	Ast	0.550864	2.19984	6.65198	0.0117487	Low_vs_Not_AD	Low_vs_Not_AD	Ast
ABCA13	Ast	0.745409	1.08834	4.3062	0.0410301	Low_vs_Not_AD	Low_vs_Not_AD	Ast
AC006972.1	Ast	1.70809	2.08206	12.0627	0.000831995	Low_vs_Not_AD	Low_vs_Not_AD	Ast
SERPINE1	Ast	1.68533	-0.141676	3.9899	0.0482503	Low_vs_Not_AD	Low_vs_Not_AD	Ast
POLR2J	Ast	-0.56772	3.49517	4.56954	0.0356146	Low_vs_Not_AD	Low_vs_Not_AD	Ast
SPDYE2	Ast	-1.10511	3.58739	4.39503	0.0392211	Low_vs_Not_AD	Low_vs_Not_AD	Ast
NAMPT	Ast	1.85531	5.79544	5.76289	0.0186963	Low_vs_Not_AD	Low_vs_Not_AD	Ast
SLC26A3	Ast	0.891099	2.22731	4.05751	0.0473303	Low_vs_Not_AD	Low_vs_Not_AD	Ast
AC005487.1	Ast	-0.881654	0.388589	4.31418	0.040561	Low_vs_Not_AD	Low_vs_Not_AD	Ast
METTL2B	Ast	0.926163	5.56895	8.46394	0.0046916	Low_vs_Not_AD	Low_vs_Not_AD	Ast
FAM71F1	Ast	1.13877	0.845817	8.34081	0.00490298	Low_vs_Not_AD	Low_vs_Not_AD	Ast
NDUFB2	Ast	-0.502027	4.35769	5.53198	0.0211393	Low_vs_Not_AD	Low_vs_Not_AD	Ast
DLGAP2	Ast	0.522834	5.75643	4.67077	0.0336783	Low_vs_Not_AD	Low_vs_Not_AD	Ast
AC103957.1	Ast	1.184	-0.508172	5.15056	0.0249991	Low_vs_Not_AD	Low_vs_Not_AD	Ast
AC087269.1	Ast	0.798313	0.651682	4.72466	0.0324532	Low_vs_Not_AD	Low_vs_Not_AD	Ast
SOX7	Ast	0.751503	-0.306395	6.96973	0.00950973	Low_vs_Not_AD	Low_vs_Not_AD	Ast
AF131216.3	Ast	-1.16911	-0.143576	8.41028	0.00452836	Low_vs_Not_AD	Low_vs_Not_AD	Ast
HR	Ast	1.0392	0.553876	8.27737	0.00501427	Low_vs_Not_AD	Low_vs_Not_AD	Ast
EGR3	Ast	1.1068	0.0101146	8.18871	0.00512913	Low_vs_Not_AD	Low_vs_Not_AD	Ast
TNFRSF10C	Ast	1.0492	0.490705	4.13112	0.0450345	Low_vs_Not_AD	Low_vs_Not_AD	Ast
AC025871.1	Ast	-0.923218	-0.304274	3.96855	0.0488194	Low_vs_Not_AD	Low_vs_Not_AD	Ast
DUSP4	Ast	1.39864	-0.508337	5.77207	0.0178039	Low_vs_Not_AD	Low_vs_Not_AD	Ast
RNF122	Ast	1.13154	2.47105	5.19208	0.0253761	Low_vs_Not_AD	Low_vs_Not_AD	Ast
AC090993.1	Ast	0.702375	5.38586	5.46662	0.0218882	Low_vs_Not_AD	Low_vs_Not_AD	Ast
LINC01605	Ast	1.63664	2.57685	7.33735	0.00825816	Low_vs_Not_AD	Low_vs_Not_AD	Ast
AC137579.2	Ast	1.9319	0.900949	8.61953	0.0041562	Low_vs_Not_AD	Low_vs_Not_AD	Ast
AC137579.1	Ast	1.91865	1.90769	7.88173	0.0061884	Low_vs_Not_AD	Low_vs_Not_AD	Ast
AC138356.3	Ast	1.84621	0.600175	11.3602	0.00110423	Low_vs_Not_AD	Low_vs_Not_AD	Ast
ADAM18	Ast	1.02198	0.0376441	5.50071	0.0209846	Low_vs_Not_AD	Low_vs_Not_AD	Ast
LINC02235	Ast	0.500771	3.15608	4.3972	0.0391769	Low_vs_Not_AD	Low_vs_Not_AD	Ast
AC105031.2	Ast	1.18698	0.830068	5.45634	0.0217684	Low_vs_Not_AD	Low_vs_Not_AD	Ast
ESRP1	Ast	1.42305	0.953457	6.20837	0.0145824	Low_vs_Not_AD	Low_vs_Not_AD	Ast
KLF10	Ast	0.98926	1.32018	4.86701	0.0302079	Low_vs_Not_AD	Low_vs_Not_AD	Ast
AC104248.1	Ast	-1.34659	1.68854	11.8959	0.000892841	Low_vs_Not_AD	Low_vs_Not_AD	Ast
AC090921.1	Ast	0.889143	0.665022	7.16747	0.00886971	Low_vs_Not_AD	Low_vs_Not_AD	Ast
TRIB1	Ast	0.813117	2.91808	6.28942	0.0141829	Low_vs_Not_AD	Low_vs_Not_AD	Ast
ARC	Ast	1.3009	0.521184	5.93403	0.0167786	Low_vs_Not_AD	Low_vs_Not_AD	Ast
AC109322.2	Ast	-0.707033	1.24884	7.12028	0.00917703	Low_vs_Not_AD	Low_vs_Not_AD	Ast
CDKN2B-AS1	Ast	-0.934657	3.1935	7.23421	0.00871303	Low_vs_Not_AD	Low_vs_Not_AD	Ast
TUSC1	Ast	-0.544716	0.776865	4.15329	0.044614	Low_vs_Not_AD	Low_vs_Not_AD	Ast
AL157884.2	Ast	0.932069	0.245236	6.00275	0.0161428	Low_vs_Not_AD	Low_vs_Not_AD	Ast
TOMM5	Ast	-0.501511	3.004	4.41597	0.0387717	Low_vs_Not_AD	Low_vs_Not_AD	Ast
TMEM252-DT	Ast	0.8768	0.572491	5.11351	0.0261575	Low_vs_Not_AD	Low_vs_Not_AD	Ast
LINC01504	Ast	0.921454	1.39016	6.86483	0.0104831	Low_vs_Not_AD	Low_vs_Not_AD	Ast
AL354920.1	Ast	-0.604912	0.467402	4.63813	0.03393	Low_vs_Not_AD	Low_vs_Not_AD	Ast
AL360020.1	Ast	0.706571	0.288951	4.80301	0.0308801	Low_vs_Not_AD	Low_vs_Not_AD	Ast
NR4A3	Ast	2.7856	3.2569	14.9225	0.000225751	Low_vs_Not_AD	Low_vs_Not_AD	Ast
AL358937.1	Ast	-0.787666	1.88254	7.47121	0.00771574	Low_vs_Not_AD	Low_vs_Not_AD	Ast
BAAT	Ast	0.804136	-0.0479655	4.76425	0.031392	Low_vs_Not_AD	Low_vs_Not_AD	Ast
OR1L8	Ast	1.0327	-0.390776	4.93809	0.0283035	Low_vs_Not_AD	Low_vs_Not_AD	Ast
RPL35	Ast	-0.554604	4.25197	4.03513	0.047948	Low_vs_Not_AD	Low_vs_Not_AD	Ast
AL445222.1	Ast	0.555105	1.93419	5.85704	0.0177839	Low_vs_Not_AD	Low_vs_Not_AD	Ast
PRRX2	Ast	1.08187	0.0108943	4.38394	0.0388133	Low_vs_Not_AD	Low_vs_Not_AD	Ast
AL731533.2	Ast	0.574028	0.861958	4.29808	0.0411595	Low_vs_Not_AD	Low_vs_Not_AD	Ast
PRKCQ-AS1	Ast	0.809122	1.63459	4.64464	0.0341297	Low_vs_Not_AD	Low_vs_Not_AD	Ast
FAM25G	Ast	1.29405	-0.227646	3.98374	0.048304	Low_vs_Not_AD	Low_vs_Not_AD	Ast
SH2D4B	Ast	0.74857	0.344704	4.41398	0.0383398	Low_vs_Not_AD	Low_vs_Not_AD	Ast
CDHR1	Ast	0.732506	1.14694	4.99198	0.0281608	Low_vs_Not_AD	Low_vs_Not_AD	Ast
AL355334.2	Ast	-0.935893	-0.0306718	8.53565	0.00429814	Low_vs_Not_AD	Low_vs_Not_AD	Ast
IFIT1	Ast	0.509462	2.38937	4.24837	0.0425574	Low_vs_Not_AD	Low_vs_Not_AD	Ast
MYOF	Ast	-1.50336	2.85192	5.06179	0.0272195	Low_vs_Not_AD	Low_vs_Not_AD	Ast
PLCE1-AS2	Ast	-1.28279	0.230292	4.61184	0.0341793	Low_vs_Not_AD	Low_vs_Not_AD	Ast
MARVELD1	Ast	0.754203	0.92571	11.2392	0.00119664	Low_vs_Not_AD	Low_vs_Not_AD	Ast
LINC01435	Ast	0.643176	1.68349	4.60345	0.0349158	Low_vs_Not_AD	Low_vs_Not_AD	Ast
NRAP	Ast	1.29793	0.511795	10.2391	0.00189321	Low_vs_Not_AD	Low_vs_Not_AD	Ast
BNIP3	Ast	0.703661	5.16938	9.12097	0.0033936	Low_vs_Not_AD	Low_vs_Not_AD	Ast
ADGRA1	Ast	0.671771	1.83873	6.85563	0.0105622	Low_vs_Not_AD	Low_vs_Not_AD	Ast
MIR210HG	Ast	1.4722	2.6286	11.987	0.000865584	Low_vs_Not_AD	Low_vs_Not_AD	Ast
KCNQ1OT1	Ast	-0.621089	3.93003	4.06277	0.0472096	Low_vs_Not_AD	Low_vs_Not_AD	Ast
OR52I1	Ast	0.673668	-0.365299	4.18504	0.0431845	Low_vs_Not_AD	Low_vs_Not_AD	Ast
MTRNR2L8	Ast	2.00893	2.75214	6.99809	0.00982657	Low_vs_Not_AD	Low_vs_Not_AD	Ast
NAV2-IT1	Ast	0.754717	0.603824	7.33028	0.00813639	Low_vs_Not_AD	Low_vs_Not_AD	Ast
LINC02742	Ast	1.25207	2.83645	11.7419	0.0009703	Low_vs_Not_AD	Low_vs_Not_AD	Ast
C11orf96	Ast	3.56067	2.87398	8.86481	0.00383734	Low_vs_Not_AD	Low_vs_Not_AD	Ast
MDK	Ast	-0.901294	2.19108	9.13814	0.00336925	Low_vs_Not_AD	Low_vs_Not_AD	Ast
AP002793.1	Ast	-0.580663	0.0101467	4.50901	0.0362009	Low_vs_Not_AD	Low_vs_Not_AD	Ast
FERMT3	Ast	-0.717887	1.2871	4.57001	0.0355042	Low_vs_Not_AD	Low_vs_Not_AD	Ast
CATSPERZ	Ast	0.729309	0.498254	4.41967	0.0383082	Low_vs_Not_AD	Low_vs_Not_AD	Ast
TRMT112	Ast	-0.597694	2.07698	5.09372	0.0267493	Low_vs_Not_AD	Low_vs_Not_AD	Ast
PRDX5	Ast	-0.587943	3.25048	6.42798	0.0131936	Low_vs_Not_AD	Low_vs_Not_AD	Ast
BANF1	Ast	-0.730139	2.6503	9.60787	0.00267999	Low_vs_Not_AD	Low_vs_Not_AD	Ast
TMEM151A	Ast	0.725051	0.753729	4.88312	0.02971	Low_vs_Not_AD	Low_vs_Not_AD	Ast
KRTAP5-10	Ast	1.30395	-0.449416	9.31851	0.00282862	Low_vs_Not_AD	Low_vs_Not_AD	Ast
AP001372.1	Ast	1.11265	0.496806	7.77385	0.00643791	Low_vs_Not_AD	Low_vs_Not_AD	Ast
AP003119.2	Ast	-1.08091	-0.0476396	7.21385	0.00840889	Low_vs_Not_AD	Low_vs_Not_AD	Ast
SCARNA9	Ast	1.15542	0.424355	8.7666	0.00390555	Low_vs_Not_AD	Low_vs_Not_AD	Ast
ANGPTL5	Ast	1.14115	0.708227	6.83475	0.010495	Low_vs_Not_AD	Low_vs_Not_AD	Ast
AP003100.2	Ast	1.41788	0.627525	10.1061	0.00202488	Low_vs_Not_AD	Low_vs_Not_AD	Ast
CCDC84-DT	Ast	-0.652448	1.53346	8.56925	0.00443778	Low_vs_Not_AD	Low_vs_Not_AD	Ast
AP000866.2	Ast	-0.74596	-0.183518	4.55752	0.0351033	Low_vs_Not_AD	Low_vs_Not_AD	Ast
AP001007.2	Ast	-1.55847	-0.238228	4.37704	0.0385539	Low_vs_Not_AD	Low_vs_Not_AD	Ast
KIRREL3-AS1	Ast	0.947178	0.250382	4.23294	0.0423797	Low_vs_Not_AD	Low_vs_Not_AD	Ast
AC005842.1	Ast	0.72961	0.0633001	4.61647	0.0341006	Low_vs_Not_AD	Low_vs_Not_AD	Ast
MRPL51	Ast	-0.599273	3.2798	4.3376	0.040493	Low_vs_Not_AD	Low_vs_Not_AD	Ast
TPI1	Ast	0.599947	4.13348	5.41964	0.0224478	Low_vs_Not_AD	Low_vs_Not_AD	Ast
AC092490.2	Ast	1.69114	2.09307	8.23094	0.00525108	Low_vs_Not_AD	Low_vs_Not_AD	Ast
AC007655.2	Ast	0.683664	0.246446	4.23042	0.0424629	Low_vs_Not_AD	Low_vs_Not_AD	Ast
AC092110.1	Ast	0.891226	-0.532476	4.40597	0.0379313	Low_vs_Not_AD	Low_vs_Not_AD	Ast
PKP2	Ast	-0.590811	2.38866	4.50572	0.0368889	Low_vs_Not_AD	Low_vs_Not_AD	Ast
CPNE8-AS1	Ast	-1.38096	0.177095	7.56301	0.00707446	Low_vs_Not_AD	Low_vs_Not_AD	Ast
C12orf40	Ast	0.629928	2.55826	4.01856	0.0484077	Low_vs_Not_AD	Low_vs_Not_AD	Ast
CCDC184	Ast	0.942395	-0.367946	4.35305	0.0392548	Low_vs_Not_AD	Low_vs_Not_AD	Ast
NR4A1	Ast	2.17434	3.4306	12.4096	0.000710988	Low_vs_Not_AD	Low_vs_Not_AD	Ast
ITGA5	Ast	1.45862	1.69251	5.66955	0.0195948	Low_vs_Not_AD	Low_vs_Not_AD	Ast
NDUFA4L2	Ast	0.778096	-0.309729	4.1452	0.0441547	Low_vs_Not_AD	Low_vs_Not_AD	Ast
SLC26A10	Ast	0.649645	0.92273	6.91351	0.0101528	Low_vs_Not_AD	Low_vs_Not_AD	Ast
AC020637.1	Ast	0.743176	0.974588	4.37963	0.0393505	Low_vs_Not_AD	Low_vs_Not_AD	Ast
LINC02231	Ast	0.84883	2.37887	4.47621	0.0374886	Low_vs_Not_AD	Low_vs_Not_AD	Ast
LGR5	Ast	0.602631	0.0593959	4.58035	0.0348322	Low_vs_Not_AD	Low_vs_Not_AD	Ast
AC073655.3	Ast	-1.5246	-0.483128	9.50994	0.0025249	Low_vs_Not_AD	Low_vs_Not_AD	Ast
AC073655.2	Ast	0.542582	0.112599	4.01621	0.0478567	Low_vs_Not_AD	Low_vs_Not_AD	Ast
AMDHD1	Ast	-0.999019	-0.39604	4.35656	0.039072	Low_vs_Not_AD	Low_vs_Not_AD	Ast
AC068790.3	Ast	0.833167	0.239272	5.17125	0.0252021	Low_vs_Not_AD	Low_vs_Not_AD	Ast
LINC02347	Ast	0.905659	-0.169775	6.31902	0.0134776	Low_vs_Not_AD	Low_vs_Not_AD	Ast
AC006065.4	Ast	1.19006	0.11698	4.6957	0.0325621	Low_vs_Not_AD	Low_vs_Not_AD	Ast
LINC00463	Ast	0.718333	0.757862	4.3701	0.0395044	Low_vs_Not_AD	Low_vs_Not_AD	Ast
LINC00544	Ast	1.99634	-0.0782807	7.34339	0.00781219	Low_vs_Not_AD	Low_vs_Not_AD	Ast
SMAD9	Ast	-0.64807	6.15196	3.99489	0.0490433	Low_vs_Not_AD	Low_vs_Not_AD	Ast
SMAD9-IT1	Ast	-0.670322	1.08008	4.88928	0.0297329	Low_vs_Not_AD	Low_vs_Not_AD	Ast
LINC00558	Ast	1.75139	1.15947	7.5376	0.00734379	Low_vs_Not_AD	Low_vs_Not_AD	Ast
AL137140.1	Ast	0.904786	0.729795	4.88351	0.0297161	Low_vs_Not_AD	Low_vs_Not_AD	Ast
AL136442.1	Ast	-1.69528	-0.613814	10.5382	0.00148102	Low_vs_Not_AD	Low_vs_Not_AD	Ast
CLYBL-AS1	Ast	0.934833	0.481051	6.0189	0.0160683	Low_vs_Not_AD	Low_vs_Not_AD	Ast
AL356966.1	Ast	0.807271	0.859037	5.51731	0.021156	Low_vs_Not_AD	Low_vs_Not_AD	Ast
POTEG	Ast	1.7172	1.37443	7.82212	0.00638296	Low_vs_Not_AD	Low_vs_Not_AD	Ast
LINC02313	Ast	0.887138	-0.087521	9.04445	0.00331166	Low_vs_Not_AD	Low_vs_Not_AD	Ast
LINC02284	Ast	0.651045	3.6354	5.15693	0.0258559	Low_vs_Not_AD	Low_vs_Not_AD	Ast
LINC01500	Ast	0.632864	2.14431	8.06038	0.00573957	Low_vs_Not_AD	Low_vs_Not_AD	Ast
SIX4	Ast	-0.772453	1.51341	4.54374	0.0360777	Low_vs_Not_AD	Low_vs_Not_AD	Ast
FLVCR2	Ast	-1.01516	2.18821	10.5229	0.00172419	Low_vs_Not_AD	Low_vs_Not_AD	Ast
AL136040.2	Ast	-0.619283	0.622919	4.49864	0.0367053	Low_vs_Not_AD	Low_vs_Not_AD	Ast
TC2N	Ast	1.28915	0.934481	5.1192	0.0261087	Low_vs_Not_AD	Low_vs_Not_AD	Ast
ADSSL1	Ast	0.823173	0.667112	7.44802	0.00768058	Low_vs_Not_AD	Low_vs_Not_AD	Ast
AC026150.1	Ast	0.761678	0.519969	7.71508	0.00668102	Low_vs_Not_AD	Low_vs_Not_AD	Ast
GREM1	Ast	1.0613	1.22767	5.39177	0.0226624	Low_vs_Not_AD	Low_vs_Not_AD	Ast
LTK	Ast	0.950819	0.0396056	6.63318	0.0114934	Low_vs_Not_AD	Low_vs_Not_AD	Ast
SCG3	Ast	0.607374	6.60904	4.80062	0.0313664	Low_vs_Not_AD	Low_vs_Not_AD	Ast
ALDH1A2	Ast	0.6161	2.34161	4.68286	0.0334557	Low_vs_Not_AD	Low_vs_Not_AD	Ast
AC100839.1	Ast	-0.83878	-0.0629961	4.02474	0.0474678	Low_vs_Not_AD	Low_vs_Not_AD	Ast
PIF1	Ast	0.63558	1.88181	4.34	0.0404137	Low_vs_Not_AD	Low_vs_Not_AD	Ast
MEGF11	Ast	0.747835	3.7617	4.62854	0.0344753	Low_vs_Not_AD	Low_vs_Not_AD	Ast
THAP10	Ast	-0.637938	0.844944	9.28125	0.0030859	Low_vs_Not_AD	Low_vs_Not_AD	Ast
THSD4	Ast	-1.0734	3.44778	6.67483	0.0116082	Low_vs_Not_AD	Low_vs_Not_AD	Ast
AC104041.1	Ast	1.57106	3.04423	5.69191	0.0194144	Low_vs_Not_AD	Low_vs_Not_AD	Ast
MFGE8	Ast	0.747167	6.01259	6.23504	0.0145828	Low_vs_Not_AD	Low_vs_Not_AD	Ast
RLBP1	Ast	0.713841	4.06648	6.6875	0.0115298	Low_vs_Not_AD	Low_vs_Not_AD	Ast
MESP1	Ast	-0.652053	1.1111	9.2401	0.00316029	Low_vs_Not_AD	Low_vs_Not_AD	Ast
AC124248.1	Ast	0.838932	-0.146215	4.45634	0.0371701	Low_vs_Not_AD	Low_vs_Not_AD	Ast
SLCO3A1	Ast	-0.588611	5.88882	3.97518	0.0495918	Low_vs_Not_AD	Low_vs_Not_AD	Ast
LINC02207	Ast	0.98303	2.67607	5.82811	0.0180711	Low_vs_Not_AD	Low_vs_Not_AD	Ast
LINC01580	Ast	0.949023	2.45884	4.50074	0.0369954	Low_vs_Not_AD	Low_vs_Not_AD	Ast
MCTP2	Ast	0.611775	-0.0142168	4.07023	0.0463126	Low_vs_Not_AD	Low_vs_Not_AD	Ast
NR2F2-AS1	Ast	0.586624	1.59509	4.75119	0.0321895	Low_vs_Not_AD	Low_vs_Not_AD	Ast
CHSY1	Ast	0.543927	6.24851	6.0064	0.0164404	Low_vs_Not_AD	Low_vs_Not_AD	Ast
AC009065.4	Ast	0.50569	2.04947	4.47246	0.0375668	Low_vs_Not_AD	Low_vs_Not_AD	Ast
NPIPA9	Ast	0.725291	-0.0914706	4.83744	0.030117	Low_vs_Not_AD	Low_vs_Not_AD	Ast
SULT1A2	Ast	0.655172	1.66667	4.4049	0.0389784	Low_vs_Not_AD	Low_vs_Not_AD	Ast
NPIPB9	Ast	1.14173	-0.0292576	6.96812	0.0096114	Low_vs_Not_AD	Low_vs_Not_AD	Ast
AC026462.4	Ast	1.46365	0.494754	6.94736	0.00979842	Low_vs_Not_AD	Low_vs_Not_AD	Ast
AC007906.2	Ast	-1.12376	0.220123	6.52518	0.0121835	Low_vs_Not_AD	Low_vs_Not_AD	Ast
MT3	Ast	-0.859016	8.02525	7.44917	0.00780534	Low_vs_Not_AD	Low_vs_Not_AD	Ast
AC009081.2	Ast	0.811579	-0.0369756	6.51905	0.0121706	Low_vs_Not_AD	Low_vs_Not_AD	Ast
AC138305.1	Ast	0.849844	1.1518	5.6009	0.020272	Low_vs_Not_AD	Low_vs_Not_AD	Ast
TERB1	Ast	0.617684	1.69661	4.87012	0.0301758	Low_vs_Not_AD	Low_vs_Not_AD	Ast
PSMB10	Ast	-0.524143	1.84493	4.43509	0.038347	Low_vs_Not_AD	Low_vs_Not_AD	Ast
ATP2C2	Ast	0.712043	2.07415	4.20962	0.0434787	Low_vs_Not_AD	Low_vs_Not_AD	Ast
AC138512.1	Ast	0.700487	0.804924	4.94695	0.0287274	Low_vs_Not_AD	Low_vs_Not_AD	Ast
PITPNA-AS1	Ast	-0.856327	1.57564	6.91398	0.0102287	Low_vs_Not_AD	Low_vs_Not_AD	Ast
OR3A2	Ast	0.721457	2.42364	4.85129	0.0305278	Low_vs_Not_AD	Low_vs_Not_AD	Ast
ASPA	Ast	0.544405	4.10013	6.28699	0.014195	Low_vs_Not_AD	Low_vs_Not_AD	Ast
AC015922.3	Ast	0.592083	0.497618	4.83545	0.0304664	Low_vs_Not_AD	Low_vs_Not_AD	Ast
FOXO3B	Ast	-0.538737	1.38422	4.75527	0.0320998	Low_vs_Not_AD	Low_vs_Not_AD	Ast
AC007952.4	Ast	0.628224	3.1468	5.81397	0.0182054	Low_vs_Not_AD	Low_vs_Not_AD	Ast
MAPK7	Ast	0.667475	1.74496	7.86788	0.00631283	Low_vs_Not_AD	Low_vs_Not_AD	Ast
LINC02094	Ast	-1.00958	-0.0912907	9.88726	0.00216899	Low_vs_Not_AD	Low_vs_Not_AD	Ast
AC025627.1	Ast	-0.80106	0.0797382	4.2607	0.0415707	Low_vs_Not_AD	Low_vs_Not_AD	Ast
MTRNR2L1	Ast	3.30095	1.27694	7.37681	0.00792371	Low_vs_Not_AD	Low_vs_Not_AD	Ast
RPL23A	Ast	-0.525184	5.27547	4.24786	0.0425574	Low_vs_Not_AD	Low_vs_Not_AD	Ast
NEK8	Ast	-0.509405	2.73722	6.78439	0.0109734	Low_vs_Not_AD	Low_vs_Not_AD	Ast
KRT10	Ast	-0.636968	3.00354	5.43398	0.0222839	Low_vs_Not_AD	Low_vs_Not_AD	Ast
GJC1	Ast	1.37265	0.624089	8.72464	0.00399439	Low_vs_Not_AD	Low_vs_Not_AD	Ast
AC126544.2	Ast	2.83774	0.298226	8.27868	0.00490381	Low_vs_Not_AD	Low_vs_Not_AD	Ast
ARL17B	Ast	1.76992	6.51751	6.21987	0.0146988	Low_vs_Not_AD	Low_vs_Not_AD	Ast
LRRC37A	Ast	0.742587	2.30933	5.08585	0.0268723	Low_vs_Not_AD	Low_vs_Not_AD	Ast
MPO	Ast	-1.00074	-0.241251	4.10184	0.0453179	Low_vs_Not_AD	Low_vs_Not_AD	Ast
SEPTIN4-AS1	Ast	0.697572	2.4683	3.9686	0.0497877	Low_vs_Not_AD	Low_vs_Not_AD	Ast
AMZ2	Ast	0.577447	5.58596	7.7065	0.00685296	Low_vs_Not_AD	Low_vs_Not_AD	Ast
KIF19	Ast	0.666202	0.194317	4.07009	0.0464371	Low_vs_Not_AD	Low_vs_Not_AD	Ast
AC023983.2	Ast	-0.662964	0.855794	4.52377	0.0363182	Low_vs_Not_AD	Low_vs_Not_AD	Ast
AC009899.1	Ast	0.679932	3.64635	5.03557	0.0276089	Low_vs_Not_AD	Low_vs_Not_AD	Ast
RNF165	Ast	0.666975	1.92992	7.2239	0.00874226	Low_vs_Not_AD	Low_vs_Not_AD	Ast
C18orf54	Ast	-0.75283	1.18578	7.63906	0.00704139	Low_vs_Not_AD	Low_vs_Not_AD	Ast
CCBE1	Ast	1.4338	4.57826	3.98878	0.0492193	Low_vs_Not_AD	Low_vs_Not_AD	Ast
AC110597.1	Ast	-0.852552	-0.123782	4.01825	0.0475675	Low_vs_Not_AD	Low_vs_Not_AD	Ast
DSEL	Ast	-0.758278	2.44328	7.76944	0.00664618	Low_vs_Not_AD	Low_vs_Not_AD	Ast
LINC01909	Ast	0.731539	1.8263	5.963	0.0168142	Low_vs_Not_AD	Low_vs_Not_AD	Ast
AC139100.2	Ast	-0.80336	0.981708	4.36667	0.0396621	Low_vs_Not_AD	Low_vs_Not_AD	Ast
BSG	Ast	0.619364	6.45296	7.35368	0.00819328	Low_vs_Not_AD	Low_vs_Not_AD	Ast
KLF16	Ast	0.602502	1.64864	4.65536	0.033942	Low_vs_Not_AD	Low_vs_Not_AD	Ast
AC006130.1	Ast	-0.844702	-0.409647	5.07724	0.0261664	Low_vs_Not_AD	Low_vs_Not_AD	Ast
RPL36	Ast	-0.55069	4.21563	5.42382	0.0223976	Low_vs_Not_AD	Low_vs_Not_AD	Ast
C3	Ast	-1.14389	4.60556	4.61154	0.0347942	Low_vs_Not_AD	Low_vs_Not_AD	Ast
TGFBR3L	Ast	0.623516	1.36091	4.04896	0.047472	Low_vs_Not_AD	Low_vs_Not_AD	Ast
THSD8	Ast	0.51298	1.14628	4.2968	0.0412907	Low_vs_Not_AD	Low_vs_Not_AD	Ast
AC008686.1	Ast	-1.06036	-0.524211	6.00673	0.0157395	Low_vs_Not_AD	Low_vs_Not_AD	Ast
NOTCH3	Ast	0.795117	2.11928	7.62715	0.00713385	Low_vs_Not_AD	Low_vs_Not_AD	Ast
ARRDC2	Ast	0.764142	1.00347	9.52262	0.00275008	Low_vs_Not_AD	Low_vs_Not_AD	Ast
KLHL26	Ast	0.543182	3.77425	5.26126	0.0244405	Low_vs_Not_AD	Low_vs_Not_AD	Ast
ZNF85	Ast	-0.722437	3.38159	10.4347	0.00179897	Low_vs_Not_AD	Low_vs_Not_AD	Ast
LINC01785	Ast	0.736348	0.738082	5.02714	0.0275233	Low_vs_Not_AD	Low_vs_Not_AD	Ast
DMKN	Ast	-1.07034	0.861151	6.08744	0.0155551	Low_vs_Not_AD	Low_vs_Not_AD	Ast
COX6B1	Ast	-0.50204	4.10073	6.2872	0.0141932	Low_vs_Not_AD	Low_vs_Not_AD	Ast
UPK1A	Ast	-1.46623	-0.385986	9.96207	0.00202824	Low_vs_Not_AD	Low_vs_Not_AD	Ast
APOC2	Ast	1.15232	0.055634	6.0594	0.0155412	Low_vs_Not_AD	Low_vs_Not_AD	Ast
FOSB	Ast	1.59319	0.0424526	7.05474	0.00911887	Low_vs_Not_AD	Low_vs_Not_AD	Ast
TEAD2	Ast	1.13276	1.74001	4.30984	0.0410842	Low_vs_Not_AD	Low_vs_Not_AD	Ast
AC010524.1	Ast	2.05127	0.403693	9.95025	0.00215364	Low_vs_Not_AD	Low_vs_Not_AD	Ast
TSKS	Ast	0.765845	-0.400309	4.71687	0.0320273	Low_vs_Not_AD	Low_vs_Not_AD	Ast
AC011483.1	Ast	1.55973	0.0115055	8.78703	0.00374647	Low_vs_Not_AD	Low_vs_Not_AD	Ast
ZNF331	Ast	0.817902	5.1949	9.32411	0.00307278	Low_vs_Not_AD	Low_vs_Not_AD	Ast
NDUFA3	Ast	-0.627169	3.96078	6.40306	0.0133622	Low_vs_Not_AD	Low_vs_Not_AD	Ast
RASSF2	Ast	0.619003	1.75215	5.47543	0.0217663	Low_vs_Not_AD	Low_vs_Not_AD	Ast
AL121757.2	Ast	-0.721971	3.19504	4.39731	0.0391744	Low_vs_Not_AD	Low_vs_Not_AD	Ast
AL031668.1	Ast	-0.945142	0.126479	4.35531	0.0394661	Low_vs_Not_AD	Low_vs_Not_AD	Ast
LBP	Ast	-1.32916	0.0707547	8.29127	0.00484474	Low_vs_Not_AD	Low_vs_Not_AD	Ast
TOX2	Ast	1.25677	3.36461	12.0847	0.000826515	Low_vs_Not_AD	Low_vs_Not_AD	Ast
SNAI1	Ast	-0.985043	0.148118	6.17956	0.0146152	Low_vs_Not_AD	Low_vs_Not_AD	Ast
LINC01440	Ast	1.07165	1.68699	7.00568	0.00976175	Low_vs_Not_AD	Low_vs_Not_AD	Ast
TUBB1	Ast	-0.785135	-0.0743375	4.76175	0.0313405	Low_vs_Not_AD	Low_vs_Not_AD	Ast
ATP5F1E	Ast	-0.599767	5.13325	4.29869	0.0413689	Low_vs_Not_AD	Low_vs_Not_AD	Ast
U2AF1L5	Ast	2.00975	1.82947	8.89433	0.00378701	Low_vs_Not_AD	Low_vs_Not_AD	Ast
GRIK1-AS1	Ast	0.668772	2.95172	5.50338	0.0214737	Low_vs_Not_AD	Low_vs_Not_AD	Ast
KCNE2	Ast	1.01618	1.17598	6.04181	0.0160833	Low_vs_Not_AD	Low_vs_Not_AD	Ast
AP001437.2	Ast	0.798406	-0.0901258	5.80279	0.0177963	Low_vs_Not_AD	Low_vs_Not_AD	Ast
ETS2	Ast	0.65582	2.17398	5.25761	0.0244831	Low_vs_Not_AD	Low_vs_Not_AD	Ast
AIRE	Ast	1.01984	0.137568	7.24845	0.00834507	Low_vs_Not_AD	Low_vs_Not_AD	Ast
MRPL40	Ast	-0.597797	1.81776	4.57431	0.0354949	Low_vs_Not_AD	Low_vs_Not_AD	Ast
SEPTIN5	Ast	0.580506	1.25661	9.06192	0.00346655	Low_vs_Not_AD	Low_vs_Not_AD	Ast
RTN4R	Ast	0.585799	2.86173	4.52456	0.0365138	Low_vs_Not_AD	Low_vs_Not_AD	Ast
RASL10A	Ast	0.82426	2.94513	4.36993	0.0397724	Low_vs_Not_AD	Low_vs_Not_AD	Ast
UQCR10	Ast	-0.67949	4.64988	4.90524	0.0296287	Low_vs_Not_AD	Low_vs_Not_AD	Ast
HMOX1	Ast	1.78303	2.14044	4.87071	0.0300695	Low_vs_Not_AD	Low_vs_Not_AD	Ast
RASD2	Ast	0.750856	0.865622	4.03033	0.0477966	Low_vs_Not_AD	Low_vs_Not_AD	Ast
Z83844.2	Ast	-0.869644	0.0392517	7.10393	0.00896527	Low_vs_Not_AD	Low_vs_Not_AD	Ast
MAFF	Ast	1.25789	2.53005	6.31663	0.0139856	Low_vs_Not_AD	Low_vs_Not_AD	Ast
NDUFA6	Ast	-0.506915	3.27276	6.18399	0.0149845	Low_vs_Not_AD	Low_vs_Not_AD	Ast
WNT7B	Ast	1.01638	2.71611	5.33612	0.0234868	Low_vs_Not_AD	Low_vs_Not_AD	Ast
PRR34	Ast	-0.888716	0.257705	6.67506	0.0112907	Low_vs_Not_AD	Low_vs_Not_AD	Ast
AC003035.1	Ast	0.840092	1.32886	4.47007	0.0375241	Low_vs_Not_AD	Low_vs_Not_AD	Ast
PIGA	Ast	0.56918	3.73394	5.081	0.0269371	Low_vs_Not_AD	Low_vs_Not_AD	Ast
AC121342.1	Ast	0.816219	0.178947	4.78041	0.031159	Low_vs_Not_AD	Low_vs_Not_AD	Ast
AC107419.1	Ast	-0.978284	1.43478	5.28584	0.0240703	Low_vs_Not_AD	Low_vs_Not_AD	Ast
LANCL3	Ast	-0.716603	2.22462	4.49291	0.0371537	Low_vs_Not_AD	Low_vs_Not_AD	Ast
EFNB1	Ast	0.669231	1.84521	5.70017	0.0193259	Low_vs_Not_AD	Low_vs_Not_AD	Ast
TEX11	Ast	0.863503	1.52593	7.43251	0.00784604	Low_vs_Not_AD	Low_vs_Not_AD	Ast
PGK1	Ast	0.528064	5.34973	4.15335	0.0448657	Low_vs_Not_AD	Low_vs_Not_AD	Ast
AC000113.1	Ast	1.17403	-0.473443	4.29037	0.0405028	Low_vs_Not_AD	Low_vs_Not_AD	Ast
AKAP14	Ast	-0.815708	0.043803	6.42537	0.0128144	Low_vs_Not_AD	Low_vs_Not_AD	Ast
TMEM255A	Ast	-0.816151	2.85331	5.21569	0.0250545	Low_vs_Not_AD	Low_vs_Not_AD	Ast
ARHGAP36	Ast	0.830747	-0.242554	5.08533	0.0261587	Low_vs_Not_AD	Low_vs_Not_AD	Ast
SMIM10L2B	Ast	0.523148	0.595631	4.06976	0.0466582	Low_vs_Not_AD	Low_vs_Not_AD	Ast
GABRE	Ast	-1.73069	2.07132	4.79699	0.0313624	Low_vs_Not_AD	Low_vs_Not_AD	Ast
MT-ATP8	Ast	1.74222	4.29685	6.83414	0.0106909	Low_vs_Not_AD	Low_vs_Not_AD	Ast
MT-ND6	Ast	1.09995	2.08012	6.71876	0.0113381	Low_vs_Not_AD	Low_vs_Not_AD	Ast
VWA1	Ast	0.546061	3.24137	4.37918	0.0395682	Inter_vs_Not_AD	Inter_vs_Not_AD	Ast
AL139246.5	Ast	0.985866	1.44158	6.25715	0.0143682	Inter_vs_Not_AD	Inter_vs_Not_AD	Ast
SLC2A5	Ast	-1.41505	1.28974	14.8846	0.000222076	Inter_vs_Not_AD	Inter_vs_Not_AD	Ast
GPR3	Ast	1.34123	0.459996	5.91539	0.0169533	Inter_vs_Not_AD	Inter_vs_Not_AD	Ast
XKR8	Ast	0.568043	2.08568	8.85748	0.00386685	Inter_vs_Not_AD	Inter_vs_Not_AD	Ast
AL360012.1	Ast	1.05769	1.12035	5.9276	0.0170158	Inter_vs_Not_AD	Inter_vs_Not_AD	Ast
POU3F1	Ast	0.553279	2.73985	4.08251	0.0467004	Inter_vs_Not_AD	Inter_vs_Not_AD	Ast
AC093151.8	Ast	-2.73273	2.11595	11.3671	0.00113085	Inter_vs_Not_AD	Inter_vs_Not_AD	Ast
SLC2A1	Ast	0.72542	4.36408	5.85835	0.0177769	Inter_vs_Not_AD	Inter_vs_Not_AD	Ast
HYI-AS1	Ast	-0.706771	0.339565	6.97837	0.00966987	Inter_vs_Not_AD	Inter_vs_Not_AD	Ast
CCDC163	Ast	0.87307	1.97904	5.43375	0.0222652	Inter_vs_Not_AD	Inter_vs_Not_AD	Ast
RAD54L	Ast	-0.62617	0.389736	4.7704	0.0314806	Inter_vs_Not_AD	Inter_vs_Not_AD	Ast
TTC22	Ast	1.10951	0.204007	4.29145	0.0408545	Inter_vs_Not_AD	Inter_vs_Not_AD	Ast
BRDT	Ast	-0.635675	-0.0630288	4.66681	0.0330922	Inter_vs_Not_AD	Inter_vs_Not_AD	Ast
GCLM	Ast	0.587552	5.27857	4.25803	0.0423165	Inter_vs_Not_AD	Inter_vs_Not_AD	Ast
IGSF3	Ast	-0.659582	0.611004	6.48284	0.0126096	Inter_vs_Not_AD	Inter_vs_Not_AD	Ast
AC239868.1	Ast	0.607228	0.639769	4.78697	0.0313342	Inter_vs_Not_AD	Inter_vs_Not_AD	Ast
MEX3A	Ast	-0.788155	0.957613	4.92499	0.0291549	Inter_vs_Not_AD	Inter_vs_Not_AD	Ast
MROH9	Ast	-0.969481	0.522561	6.3163	0.0136921	Inter_vs_Not_AD	Inter_vs_Not_AD	Ast
GLUL	Ast	0.599423	9.0804	6.41626	0.0132675	Inter_vs_Not_AD	Inter_vs_Not_AD	Ast
AL645504.1	Ast	-0.889979	0.188879	5.21316	0.0245951	Inter_vs_Not_AD	Inter_vs_Not_AD	Ast
GPR37L1	Ast	0.617297	6.49763	5.51469	0.021333	Inter_vs_Not_AD	Inter_vs_Not_AD	Ast
DYRK3	Ast	0.522827	3.95513	4.76301	0.0320222	Inter_vs_Not_AD	Inter_vs_Not_AD	Ast
LAMB3	Ast	-0.943369	0.187074	12.0553	0.000775035	Inter_vs_Not_AD	Inter_vs_Not_AD	Ast
G0S2	Ast	-1.58649	1.06322	7.02974	0.00951689	Inter_vs_Not_AD	Inter_vs_Not_AD	Ast
AL591895.1	Ast	-0.516924	3.13899	6.95736	0.0100379	Inter_vs_Not_AD	Inter_vs_Not_AD	Ast
LEFTY1	Ast	-0.50527	2.07394	5.52126	0.0212566	Inter_vs_Not_AD	Inter_vs_Not_AD	Ast
WNT9A	Ast	1.23449	0.281989	4.54742	0.0354843	Inter_vs_Not_AD	Inter_vs_Not_AD	Ast
LINC01354	Ast	0.916642	3.33719	12.7908	0.000596263	Inter_vs_Not_AD	Inter_vs_Not_AD	Ast
AL591686.1	Ast	2.09478	-0.0855032	13.1089	0.000444242	Inter_vs_Not_AD	Inter_vs_Not_AD	Ast
AC104335.1	Ast	-0.823431	1.91568	5.32651	0.0235538	Inter_vs_Not_AD	Inter_vs_Not_AD	Ast
SNTG2	Ast	-0.581896	0.935907	4.56737	0.0354586	Inter_vs_Not_AD	Inter_vs_Not_AD	Ast
SOX11	Ast	-1.37314	-0.278491	5.81826	0.0174922	Inter_vs_Not_AD	Inter_vs_Not_AD	Ast
AC099344.3	Ast	0.738624	-0.306735	3.95841	0.0490905	Inter_vs_Not_AD	Inter_vs_Not_AD	Ast
LINC00954	Ast	0.715627	0.123984	5.93647	0.0166346	Inter_vs_Not_AD	Inter_vs_Not_AD	Ast
STON1-GTF2A1L	Ast	-0.847456	0.747281	4.32276	0.0405072	Inter_vs_Not_AD	Inter_vs_Not_AD	Ast
MEIS1-AS3	Ast	-0.640277	0.349636	4.85994	0.0299716	Inter_vs_Not_AD	Inter_vs_Not_AD	Ast
LINC01828	Ast	-0.992316	-0.34778	5.84385	0.0172339	Inter_vs_Not_AD	Inter_vs_Not_AD	Ast
EMX1	Ast	-0.669181	0.13199	5.61401	0.019806	Inter_vs_Not_AD	Inter_vs_Not_AD	Ast
HK2	Ast	1.10668	3.24708	4.57843	0.0354412	Inter_vs_Not_AD	Inter_vs_Not_AD	Ast
AC073091.4	Ast	-0.686058	0.729524	4.56777	0.0353392	Inter_vs_Not_AD	Inter_vs_Not_AD	Ast
RGPD3	Ast	0.736376	0.0307053	4.7128	0.032318	Inter_vs_Not_AD	Inter_vs_Not_AD	Ast
C1QL2	Ast	1.24183	1.71845	9.36947	0.00299814	Inter_vs_Not_AD	Inter_vs_Not_AD	Ast
GYPC	Ast	-0.76547	0.652696	5.08309	0.0266184	Inter_vs_Not_AD	Inter_vs_Not_AD	Ast
GPR39	Ast	-0.726911	4.63347	5.65264	0.0198235	Inter_vs_Not_AD	Inter_vs_Not_AD	Ast
AC010974.1	Ast	-1.02308	0.0207667	7.97851	0.00572399	Inter_vs_Not_AD	Inter_vs_Not_AD	Ast
AC105402.3	Ast	2.85032	3.01136	8.6606	0.00421701	Inter_vs_Not_AD	Inter_vs_Not_AD	Ast
AC023469.1	Ast	1.30148	3.42054	4.91356	0.0295027	Inter_vs_Not_AD	Inter_vs_Not_AD	Ast
AC012066.2	Ast	-0.614716	0.652303	4.26725	0.0417648	Inter_vs_Not_AD	Inter_vs_Not_AD	Ast
NR4A2	Ast	0.654847	4.48347	5.60448	0.0203381	Inter_vs_Not_AD	Inter_vs_Not_AD	Ast
GRB14	Ast	-0.743792	0.597637	8.26096	0.00507214	Inter_vs_Not_AD	Inter_vs_Not_AD	Ast
COBLL1	Ast	-0.650438	3.18176	5.63594	0.0200064	Inter_vs_Not_AD	Inter_vs_Not_AD	Ast
SCN1A-AS1	Ast	-0.820845	3.46387	8.13363	0.0055342	Inter_vs_Not_AD	Inter_vs_Not_AD	Ast
SCN1A	Ast	-0.735064	4.92219	6.9736	0.00994918	Inter_vs_Not_AD	Inter_vs_Not_AD	Ast
PDK1	Ast	1.02776	4.35897	7.88882	0.00625327	Inter_vs_Not_AD	Inter_vs_Not_AD	Ast
AC068196.1	Ast	-0.701936	-0.120523	4.11842	0.0449988	Inter_vs_Not_AD	Inter_vs_Not_AD	Ast
CDK15	Ast	-0.6883	-0.137031	4.10922	0.0452343	Inter_vs_Not_AD	Inter_vs_Not_AD	Ast
PLCD4	Ast	-0.83213	3.72892	4.97825	0.0284804	Inter_vs_Not_AD	Inter_vs_Not_AD	Ast
LINC02832	Ast	1.95381	0.214128	8.6392	0.00400309	Inter_vs_Not_AD	Inter_vs_Not_AD	Ast
ITM2C	Ast	0.520181	7.1102	7.43672	0.00785485	Inter_vs_Not_AD	Inter_vs_Not_AD	Ast
COPS9	Ast	-0.529003	4.88164	4.30177	0.0412985	Inter_vs_Not_AD	Inter_vs_Not_AD	Ast
OTOS	Ast	-1.19698	1.05983	8.95575	0.00362068	Inter_vs_Not_AD	Inter_vs_Not_AD	Ast
AC005104.3	Ast	-0.611969	0.0827208	4.53365	0.0357171	Inter_vs_Not_AD	Inter_vs_Not_AD	Ast
EGOT	Ast	-0.841003	-0.34728	5.84802	0.0172455	Inter_vs_Not_AD	Inter_vs_Not_AD	Ast
BHLHE40	Ast	0.62552	5.52035	5.01525	0.0279084	Inter_vs_Not_AD	Inter_vs_Not_AD	Ast
OXTR	Ast	1.26093	3.00188	5.91334	0.0172757	Inter_vs_Not_AD	Inter_vs_Not_AD	Ast
LINC00691	Ast	-0.909452	-0.4463	6.15454	0.0145347	Inter_vs_Not_AD	Inter_vs_Not_AD	Ast
GPD1L	Ast	-0.587966	1.9142	6.61232	0.0119676	Inter_vs_Not_AD	Inter_vs_Not_AD	Ast
STAC	Ast	-0.905746	-0.409055	5.04538	0.0266435	Inter_vs_Not_AD	Inter_vs_Not_AD	Ast
LRRC2	Ast	-0.787484	1.93571	6.1112	0.0155306	Inter_vs_Not_AD	Inter_vs_Not_AD	Ast
DALRD3	Ast	-0.511204	3.54693	6.22567	0.0146601	Inter_vs_Not_AD	Inter_vs_Not_AD	Ast
TRAIP	Ast	-0.670821	0.780134	8.69382	0.00410225	Inter_vs_Not_AD	Inter_vs_Not_AD	Ast
MTRNR2L12	Ast	2.31113	5.24635	9.80497	0.0024331	Inter_vs_Not_AD	Inter_vs_Not_AD	Ast
LINC01990	Ast	-0.643672	0.628063	5.70192	0.0190622	Inter_vs_Not_AD	Inter_vs_Not_AD	Ast
SIDT1	Ast	-0.815546	3.48251	6.75629	0.0111305	Inter_vs_Not_AD	Inter_vs_Not_AD	Ast
ZDHHC23	Ast	-0.525325	1.89017	4.8255	0.0309115	Inter_vs_Not_AD	Inter_vs_Not_AD	Ast
AC126182.3	Ast	-0.744994	0.710075	10.2286	0.00191869	Inter_vs_Not_AD	Inter_vs_Not_AD	Ast
FAM162A	Ast	0.597455	5.58784	7.80025	0.0065368	Inter_vs_Not_AD	Inter_vs_Not_AD	Ast
C3orf22	Ast	-0.848384	0.259763	5.46437	0.0215012	Inter_vs_Not_AD	Inter_vs_Not_AD	Ast
NCK1-DT	Ast	-0.504313	4.35355	4.65057	0.0340565	Inter_vs_Not_AD	Inter_vs_Not_AD	Ast
SPSB4	Ast	-1.69219	0.934231	10.7616	0.00147661	Inter_vs_Not_AD	Inter_vs_Not_AD	Ast
CHST2	Ast	-0.604892	1.55542	6.90592	0.0102726	Inter_vs_Not_AD	Inter_vs_Not_AD	Ast
AC092957.1	Ast	0.831733	-0.112942	4.71942	0.0320881	Inter_vs_Not_AD	Inter_vs_Not_AD	Ast
AC091607.2	Ast	0.570815	1.14477	5.58477	0.0204853	Inter_vs_Not_AD	Inter_vs_Not_AD	Ast
IL12A-AS1	Ast	-0.533304	2.1316	6.52215	0.0125489	Inter_vs_Not_AD	Inter_vs_Not_AD	Ast
ETV5	Ast	0.814317	4.72557	5.88004	0.0175734	Inter_vs_Not_AD	Inter_vs_Not_AD	Ast
TPRG1-AS1	Ast	0.685149	0.110337	4.55015	0.0354291	Inter_vs_Not_AD	Inter_vs_Not_AD	Ast
TP63	Ast	0.674235	0.567961	4.4643	0.0374516	Inter_vs_Not_AD	Inter_vs_Not_AD	Ast
UBXN7-AS1	Ast	-0.990211	-0.432417	5.49201	0.0208764	Inter_vs_Not_AD	Inter_vs_Not_AD	Ast
RNF212	Ast	0.714031	1.90302	5.91406	0.0172656	Inter_vs_Not_AD	Inter_vs_Not_AD	Ast
AC073848.1	Ast	0.764229	0.476843	4.60212	0.0346331	Inter_vs_Not_AD	Inter_vs_Not_AD	Ast
AC092546.1	Ast	0.684669	3.01383	4.10549	0.0460991	Inter_vs_Not_AD	Inter_vs_Not_AD	Ast
BST1	Ast	-0.876293	0.444449	6.72988	0.0110375	Inter_vs_Not_AD	Inter_vs_Not_AD	Ast
AC096576.3	Ast	-0.991666	-0.580187	4.30696	0.040114	Inter_vs_Not_AD	Inter_vs_Not_AD	Ast
AC093791.2	Ast	-1.24752	-0.463491	6.87959	0.00988285	Inter_vs_Not_AD	Inter_vs_Not_AD	Ast
AC097480.1	Ast	-1.21673	-0.427247	9.73023	0.00229038	Inter_vs_Not_AD	Inter_vs_Not_AD	Ast
AC108471.3	Ast	-0.70551	1.04531	5.18645	0.0252887	Inter_vs_Not_AD	Inter_vs_Not_AD	Ast
AC096586.1	Ast	0.782385	0.299097	7.3942	0.00782324	Inter_vs_Not_AD	Inter_vs_Not_AD	Ast
LRRC66	Ast	0.536649	2.41501	4.87167	0.0301875	Inter_vs_Not_AD	Inter_vs_Not_AD	Ast
AC104689.2	Ast	-0.62161	0.0342365	4.45518	0.0373434	Inter_vs_Not_AD	Inter_vs_Not_AD	Ast
EMCN	Ast	-0.65221	0.603378	4.0919	0.0460796	Inter_vs_Not_AD	Inter_vs_Not_AD	Ast
AC097459.1	Ast	-0.882508	0.0961778	3.97582	0.0489223	Inter_vs_Not_AD	Inter_vs_Not_AD	Ast
AF213884.3	Ast	0.734394	0.065336	3.98938	0.0485685	Inter_vs_Not_AD	Inter_vs_Not_AD	Ast
ENPEP	Ast	-0.959095	0.0603635	7.52494	0.00721167	Inter_vs_Not_AD	Inter_vs_Not_AD	Ast
LINC02516	Ast	0.957655	0.660979	4.68894	0.0330809	Inter_vs_Not_AD	Inter_vs_Not_AD	Ast
AC096711.2	Ast	0.919865	1.50343	4.63135	0.0343855	Inter_vs_Not_AD	Inter_vs_Not_AD	Ast
AC079380.1	Ast	-0.933581	-0.333006	4.33368	0.0397026	Inter_vs_Not_AD	Inter_vs_Not_AD	Ast
RNF175	Ast	-0.560732	3.12286	5.31234	0.0237831	Inter_vs_Not_AD	Inter_vs_Not_AD	Ast
DCHS2	Ast	-0.623945	6.81029	6.40044	0.0133772	Inter_vs_Not_AD	Inter_vs_Not_AD	Ast
ANKRD37	Ast	0.606069	2.97127	4.18868	0.043999	Inter_vs_Not_AD	Inter_vs_Not_AD	Ast
LINC01060	Ast	-1.09927	0.63045	22.4581	8.05577837833349e-06	Inter_vs_Not_AD	Inter_vs_Not_AD	Ast
LINC02150	Ast	-0.955939	0.653769	9.0924	0.00333557	Inter_vs_Not_AD	Inter_vs_Not_AD	Ast
C5orf17	Ast	1.53184	3.94929	5.28233	0.0241677	Inter_vs_Not_AD	Inter_vs_Not_AD	Ast
PURPL	Ast	1.10938	-0.0503913	4.27349	0.0411973	Inter_vs_Not_AD	Inter_vs_Not_AD	Ast
AC099517.1	Ast	-0.740912	0.387579	5.84433	0.017593	Inter_vs_Not_AD	Inter_vs_Not_AD	Ast
AC008875.3	Ast	-0.696643	0.493437	5.52499	0.0209295	Inter_vs_Not_AD	Inter_vs_Not_AD	Ast
CARTPT	Ast	-1.0721	-0.643911	4.38545	0.0382766	Inter_vs_Not_AD	Inter_vs_Not_AD	Ast
AC025774.1	Ast	0.525622	3.36065	4.88742	0.0299244	Inter_vs_Not_AD	Inter_vs_Not_AD	Ast
SLCO4C1	Ast	-0.777988	-0.284376	5.73851	0.0183359	Inter_vs_Not_AD	Inter_vs_Not_AD	Ast
PRR16	Ast	-0.9579	4.39279	7.38906	0.00804918	Inter_vs_Not_AD	Inter_vs_Not_AD	Ast
AC008591.1	Ast	-0.654259	1.77019	4.80057	0.0313144	Inter_vs_Not_AD	Inter_vs_Not_AD	Ast
PCDHB2	Ast	0.504638	1.15273	6.21287	0.0147016	Inter_vs_Not_AD	Inter_vs_Not_AD	Ast
GPX3	Ast	1.1721	0.351937	5.3374	0.0230665	Inter_vs_Not_AD	Inter_vs_Not_AD	Ast
INSYN2B	Ast	-0.720555	2.52568	4.42418	0.0385747	Inter_vs_Not_AD	Inter_vs_Not_AD	Ast
AC113346.2	Ast	-1.28933	0.0253032	11.9707	0.000793815	Inter_vs_Not_AD	Inter_vs_Not_AD	Ast
FGFR4	Ast	-0.927955	0.245058	8.72298	0.00396023	Inter_vs_Not_AD	Inter_vs_Not_AD	Ast
CBY3	Ast	-0.719429	0.406445	5.72973	0.0186948	Inter_vs_Not_AD	Inter_vs_Not_AD	Ast
AL590004.3	Ast	1.3177	-0.147718	5.19408	0.0245999	Inter_vs_Not_AD	Inter_vs_Not_AD	Ast
PPP1R3G	Ast	1.00127	1.56058	9.52283	0.0027857	Inter_vs_Not_AD	Inter_vs_Not_AD	Ast
AL358777.1	Ast	-0.672949	0.0333851	4.25545	0.0416926	Inter_vs_Not_AD	Inter_vs_Not_AD	Ast
EDN1	Ast	0.71492	-0.0235282	5.03928	0.0269725	Inter_vs_Not_AD	Inter_vs_Not_AD	Ast
RBM24	Ast	-0.635716	-0.199745	3.97088	0.0489071	Inter_vs_Not_AD	Inter_vs_Not_AD	Ast
BTN3A3	Ast	-0.665874	1.50927	6.48026	0.0127932	Inter_vs_Not_AD	Inter_vs_Not_AD	Ast
ZBED9	Ast	-0.785982	0.40186	8.22856	0.00511328	Inter_vs_Not_AD	Inter_vs_Not_AD	Ast
ZNF311	Ast	-0.93172	1.21617	12.0919	0.000805376	Inter_vs_Not_AD	Inter_vs_Not_AD	Ast
HLA-C	Ast	0.745975	3.65005	4.86783	0.030243	Inter_vs_Not_AD	Inter_vs_Not_AD	Ast
TSBP1-AS1	Ast	-0.558393	5.1229	4.59682	0.0350759	Inter_vs_Not_AD	Inter_vs_Not_AD	Ast
ADGRF5	Ast	-0.711188	-0.0912422	4.37228	0.0390338	Inter_vs_Not_AD	Inter_vs_Not_AD	Ast
PKHD1	Ast	0.770282	0.54059	5.327	0.0233028	Inter_vs_Not_AD	Inter_vs_Not_AD	Ast
PAQR8	Ast	0.605743	5.3896	7.09174	0.00936442	Inter_vs_Not_AD	Inter_vs_Not_AD	Ast
B3GAT2	Ast	-0.707021	5.45743	6.05942	0.0159888	Inter_vs_Not_AD	Inter_vs_Not_AD	Ast
AL355612.1	Ast	-1.1922	3.71053	6.81778	0.0107828	Inter_vs_Not_AD	Inter_vs_Not_AD	Ast
TPBG	Ast	-0.983401	0.319982	7.84761	0.00616875	Inter_vs_Not_AD	Inter_vs_Not_AD	Ast
GJB7	Ast	-0.884949	0.7853	4.84519	0.0303231	Inter_vs_Not_AD	Inter_vs_Not_AD	Ast
AL356094.2	Ast	-0.817892	0.385418	3.94774	0.0498842	Inter_vs_Not_AD	Inter_vs_Not_AD	Ast
GPR63	Ast	-0.500485	1.7216	8.91203	0.00374843	Inter_vs_Not_AD	Inter_vs_Not_AD	Ast
PRDM1	Ast	-0.925671	0.844678	7.4126	0.00783061	Inter_vs_Not_AD	Inter_vs_Not_AD	Ast
MARCKS	Ast	0.55014	5.30858	6.31344	0.013998	Inter_vs_Not_AD	Inter_vs_Not_AD	Ast
ROS1	Ast	-0.773189	0.945832	5.70974	0.0190784	Inter_vs_Not_AD	Inter_vs_Not_AD	Ast
ARHGAP18	Ast	-0.786918	2.7662	10.757	0.00154291	Inter_vs_Not_AD	Inter_vs_Not_AD	Ast
MTFR2	Ast	-1.12407	-0.00317654	10.1901	0.0018855	Inter_vs_Not_AD	Inter_vs_Not_AD	Ast
AL023581.1	Ast	-0.857662	-0.106418	5.57343	0.0200916	Inter_vs_Not_AD	Inter_vs_Not_AD	Ast
PLAGL1	Ast	-0.706396	4.83511	6.31678	0.0139743	Inter_vs_Not_AD	Inter_vs_Not_AD	Ast
HYMAI	Ast	-0.904598	1.47449	7.92681	0.0061042	Inter_vs_Not_AD	Inter_vs_Not_AD	Ast
AL450344.3	Ast	0.82672	-0.101615	6.50893	0.0121933	Inter_vs_Not_AD	Inter_vs_Not_AD	Ast
CLDN20	Ast	-0.64936	1.4564	4.13518	0.0452323	Inter_vs_Not_AD	Inter_vs_Not_AD	Ast
LINC00574	Ast	-0.581917	0.495484	6.52285	0.0123143	Inter_vs_Not_AD	Inter_vs_Not_AD	Ast
AC093627.4	Ast	0.902791	-0.124439	7.16056	0.00865296	Inter_vs_Not_AD	Inter_vs_Not_AD	Ast
GPR146	Ast	0.512425	2.27592	4.82933	0.030887	Inter_vs_Not_AD	Inter_vs_Not_AD	Ast
NUDT1	Ast	-0.566815	-0.0764633	4.11512	0.0450777	Inter_vs_Not_AD	Inter_vs_Not_AD	Ast
AC079804.3	Ast	0.952066	-0.153189	10.3638	0.00170356	Inter_vs_Not_AD	Inter_vs_Not_AD	Ast
AC004982.1	Ast	0.519356	1.96438	4.69231	0.0332785	Inter_vs_Not_AD	Inter_vs_Not_AD	Ast
TSPAN13	Ast	-0.517221	2.41892	6.55754	0.0123318	Inter_vs_Not_AD	Inter_vs_Not_AD	Ast
AHR	Ast	-0.610067	2.08415	4.26111	0.0422386	Inter_vs_Not_AD	Inter_vs_Not_AD	Ast
AC003093.1	Ast	-0.964786	1.43138	8.41574	0.00477653	Inter_vs_Not_AD	Inter_vs_Not_AD	Ast
AC004540.2	Ast	0.678699	2.45892	5.70385	0.0193002	Inter_vs_Not_AD	Inter_vs_Not_AD	Ast
CREB5	Ast	0.900266	5.19858	8.98444	0.00362863	Inter_vs_Not_AD	Inter_vs_Not_AD	Ast
PDE1C	Ast	-0.721377	4.87804	4.77557	0.0318002	Inter_vs_Not_AD	Inter_vs_Not_AD	Ast
AOAH	Ast	-0.584522	1.00728	6.46929	0.0128004	Inter_vs_Not_AD	Inter_vs_Not_AD	Ast
NACAD	Ast	0.609261	2.19984	9.33164	0.00306499	Inter_vs_Not_AD	Inter_vs_Not_AD	Ast
AC006972.1	Ast	1.03145	2.08206	4.6501	0.0340468	Inter_vs_Not_AD	Inter_vs_Not_AD	Ast
AC002456.1	Ast	0.531364	0.60232	4.3663	0.0395669	Inter_vs_Not_AD	Inter_vs_Not_AD	Ast
HEPACAM2	Ast	0.756491	-0.135834	4.6706	0.0329862	Inter_vs_Not_AD	Inter_vs_Not_AD	Ast
AC002467.1	Ast	-0.564419	0.150954	4.88703	0.0294177	Inter_vs_Not_AD	Inter_vs_Not_AD	Ast
EPHA1-AS1	Ast	0.971554	1.3855	5.7804	0.0184852	Inter_vs_Not_AD	Inter_vs_Not_AD	Ast
TCAF2	Ast	1.72615	0.83291	8.50486	0.00450256	Inter_vs_Not_AD	Inter_vs_Not_AD	Ast
TMEM176A	Ast	0.535289	2.15789	6.86288	0.0105385	Inter_vs_Not_AD	Inter_vs_Not_AD	Ast
VIPR2	Ast	0.9787	1.53528	4.78503	0.0315964	Inter_vs_Not_AD	Inter_vs_Not_AD	Ast
AF131216.3	Ast	-0.705203	-0.143576	4.17225	0.0435484	Inter_vs_Not_AD	Inter_vs_Not_AD	Ast
FAM86B2	Ast	-0.619035	-0.112309	4.0896	0.0457731	Inter_vs_Not_AD	Inter_vs_Not_AD	Ast
AC087273.2	Ast	-0.730399	1.9357	4.49656	0.0370435	Inter_vs_Not_AD	Inter_vs_Not_AD	Ast
TNFRSF10C	Ast	1.13979	0.490705	5.62012	0.0198791	Inter_vs_Not_AD	Inter_vs_Not_AD	Ast
RNF122	Ast	0.982745	2.47105	4.34841	0.0402551	Inter_vs_Not_AD	Inter_vs_Not_AD	Ast
LINC01605	Ast	1.48622	2.57685	6.83426	0.010683	Inter_vs_Not_AD	Inter_vs_Not_AD	Ast
AC137579.2	Ast	1.91056	0.900949	9.42669	0.00277657	Inter_vs_Not_AD	Inter_vs_Not_AD	Ast
AC137579.1	Ast	1.85393	1.90769	8.23227	0.00518708	Inter_vs_Not_AD	Inter_vs_Not_AD	Ast
ZNF703	Ast	0.620542	3.26114	4.9771	0.0285009	Inter_vs_Not_AD	Inter_vs_Not_AD	Ast
AC138356.3	Ast	1.52008	0.600175	8.6336	0.00418535	Inter_vs_Not_AD	Inter_vs_Not_AD	Ast
AC023095.1	Ast	0.570165	7.02688	4.01369	0.0485264	Inter_vs_Not_AD	Inter_vs_Not_AD	Ast
AC068700.1	Ast	0.70254	0.884857	4.32195	0.0406873	Inter_vs_Not_AD	Inter_vs_Not_AD	Ast
AC018616.1	Ast	-0.818406	2.99579	5.74582	0.0188756	Inter_vs_Not_AD	Inter_vs_Not_AD	Ast
KLF10	Ast	0.953542	1.32018	5.10617	0.026527	Inter_vs_Not_AD	Inter_vs_Not_AD	Ast
AP002851.1	Ast	0.675592	-0.0294541	5.67542	0.0190927	Inter_vs_Not_AD	Inter_vs_Not_AD	Ast
AC104248.1	Ast	-1.5076	1.68854	17.0098	8.89864149194227e-05	Inter_vs_Not_AD	Inter_vs_Not_AD	Ast
LINC01608	Ast	-0.681007	1.06349	4.33155	0.0404197	Inter_vs_Not_AD	Inter_vs_Not_AD	Ast
SLC30A8	Ast	-0.984067	0.758544	6.9206	0.010052	Inter_vs_Not_AD	Inter_vs_Not_AD	Ast
AC090921.1	Ast	0.636248	0.665022	3.96466	0.0495965	Inter_vs_Not_AD	Inter_vs_Not_AD	Ast
TRIB1	Ast	0.608442	2.91808	3.96128	0.0499965	Inter_vs_Not_AD	Inter_vs_Not_AD	Ast
AC046195.1	Ast	-0.508321	1.4727	4.46174	0.0377338	Inter_vs_Not_AD	Inter_vs_Not_AD	Ast
ARC	Ast	1.47532	0.521184	8.49223	0.00447831	Inter_vs_Not_AD	Inter_vs_Not_AD	Ast
AL391117.1	Ast	-0.725779	2.15081	4.92475	0.029287	Inter_vs_Not_AD	Inter_vs_Not_AD	Ast
TUSC1	Ast	-0.52294	0.776865	4.6616	0.0336181	Inter_vs_Not_AD	Inter_vs_Not_AD	Ast
PRSS3	Ast	-0.61512	1.1035	6.26214	0.0142704	Inter_vs_Not_AD	Inter_vs_Not_AD	Ast
RMRP	Ast	1.04682	3.28728	6.10384	0.0156278	Inter_vs_Not_AD	Inter_vs_Not_AD	Ast
BX088651.4	Ast	0.552614	0.190487	4.22713	0.042556	Inter_vs_Not_AD	Inter_vs_Not_AD	Ast
LERFS	Ast	-1.05408	2.81594	6.41224	0.0132981	Inter_vs_Not_AD	Inter_vs_Not_AD	Ast
KLF9	Ast	0.539389	5.79231	7.58189	0.00729805	Inter_vs_Not_AD	Inter_vs_Not_AD	Ast
LINC01504	Ast	0.685415	1.39016	4.35664	0.0399898	Inter_vs_Not_AD	Inter_vs_Not_AD	Ast
ZFAND5	Ast	0.532573	6.75117	5.73671	0.0189567	Inter_vs_Not_AD	Inter_vs_Not_AD	Ast
NR4A3	Ast	1.85455	3.2569	7.16724	0.00899882	Inter_vs_Not_AD	Inter_vs_Not_AD	Ast
AL358937.1	Ast	-0.670858	1.88254	6.5487	0.0123819	Inter_vs_Not_AD	Inter_vs_Not_AD	Ast
STOM	Ast	0.535597	6.16891	7.76014	0.00667002	Inter_vs_Not_AD	Inter_vs_Not_AD	Ast
PRRX2	Ast	1.00176	0.0108943	4.40685	0.0383178	Inter_vs_Not_AD	Inter_vs_Not_AD	Ast
NRARP	Ast	0.730335	2.60608	4.65569	0.0339704	Inter_vs_Not_AD	Inter_vs_Not_AD	Ast
AL731533.3	Ast	1.95979	-0.420013	11.5937	0.000884854	Inter_vs_Not_AD	Inter_vs_Not_AD	Ast
PROSER2	Ast	-0.718148	0.580951	4.21998	0.0428257	Inter_vs_Not_AD	Inter_vs_Not_AD	Ast
AL157392.2	Ast	-1.13166	-0.122323	9.40599	0.00276939	Inter_vs_Not_AD	Inter_vs_Not_AD	Ast
MYO3A	Ast	-1.09842	1.08074	8.00539	0.00579132	Inter_vs_Not_AD	Inter_vs_Not_AD	Ast
AC068707.1	Ast	-0.669247	0.10006	4.53461	0.0357249	Inter_vs_Not_AD	Inter_vs_Not_AD	Ast
ANXA8	Ast	1.49521	1.02689	4.36768	0.0396256	Inter_vs_Not_AD	Inter_vs_Not_AD	Ast
PLAC9	Ast	0.9806	0.454487	6.01935	0.0160699	Inter_vs_Not_AD	Inter_vs_Not_AD	Ast
AL355334.2	Ast	-0.816962	-0.0306718	8.319	0.00479707	Inter_vs_Not_AD	Inter_vs_Not_AD	Ast
ACTA2	Ast	0.816183	3.96482	4.58666	0.0352762	Inter_vs_Not_AD	Inter_vs_Not_AD	Ast
AL157394.3	Ast	1.20739	0.720274	7.56128	0.00725099	Inter_vs_Not_AD	Inter_vs_Not_AD	Ast
FAS	Ast	0.994372	5.04354	6.45893	0.012977	Inter_vs_Not_AD	Inter_vs_Not_AD	Ast
IFIT1	Ast	0.594002	2.38937	6.77266	0.0110387	Inter_vs_Not_AD	Inter_vs_Not_AD	Ast
SCD	Ast	0.665206	4.59862	4.92336	0.0293379	Inter_vs_Not_AD	Inter_vs_Not_AD	Ast
SFR1	Ast	0.594956	1.39906	6.1259	0.0154059	Inter_vs_Not_AD	Inter_vs_Not_AD	Ast
NRAP	Ast	1.13527	0.511795	8.6162	0.00421772	Inter_vs_Not_AD	Inter_vs_Not_AD	Ast
AFAP1L2	Ast	-0.540236	0.628262	4.31018	0.0407878	Inter_vs_Not_AD	Inter_vs_Not_AD	Ast
HTRA1	Ast	0.514271	7.02003	6.23687	0.0145687	Inter_vs_Not_AD	Inter_vs_Not_AD	Ast
LINC02641	Ast	-0.856354	1.12623	4.97299	0.0284268	Inter_vs_Not_AD	Inter_vs_Not_AD	Ast
AL731577.1	Ast	-1.918	-0.17888	13.5456	0.000369182	Inter_vs_Not_AD	Inter_vs_Not_AD	Ast
MMP21	Ast	-0.620947	1.08724	4.56158	0.0356001	Inter_vs_Not_AD	Inter_vs_Not_AD	Ast
BNIP3	Ast	0.571016	5.16938	6.863	0.0105304	Inter_vs_Not_AD	Inter_vs_Not_AD	Ast
ADAM8	Ast	-0.634079	1.10799	7.94351	0.00602069	Inter_vs_Not_AD	Inter_vs_Not_AD	Ast
MIR210HG	Ast	1.16905	2.6286	8.56872	0.00445929	Inter_vs_Not_AD	Inter_vs_Not_AD	Ast
MUC6	Ast	-1.40282	0.425318	10.3275	0.00179412	Inter_vs_Not_AD	Inter_vs_Not_AD	Ast
MTRNR2L8	Ast	2.773	2.75214	13.9508	0.000350988	Inter_vs_Not_AD	Inter_vs_Not_AD	Ast
AC107881.1	Ast	-0.967323	-0.13476	5.80489	0.0177373	Inter_vs_Not_AD	Inter_vs_Not_AD	Ast
AC090469.1	Ast	-0.640106	0.209413	5.36994	0.0226225	Inter_vs_Not_AD	Inter_vs_Not_AD	Ast
EHF	Ast	-0.685319	0.135042	4.38202	0.0389571	Inter_vs_Not_AD	Inter_vs_Not_AD	Ast
DTX4	Ast	-0.64087	3.06117	6.38465	0.0134962	Inter_vs_Not_AD	Inter_vs_Not_AD	Ast
AP003778.1	Ast	0.811556	0.151069	4.01836	0.0477368	Inter_vs_Not_AD	Inter_vs_Not_AD	Ast
AP001160.4	Ast	0.859133	-0.193665	5.57333	0.0200233	Inter_vs_Not_AD	Inter_vs_Not_AD	Ast
FERMT3	Ast	-0.641895	1.2871	4.37829	0.0394815	Inter_vs_Not_AD	Inter_vs_Not_AD	Ast
FOSL1	Ast	1.43608	0.787451	5.22313	0.0246998	Inter_vs_Not_AD	Inter_vs_Not_AD	Ast
AP001107.1	Ast	-0.850201	0.319117	6.03116	0.0158763	Inter_vs_Not_AD	Inter_vs_Not_AD	Ast
AP002761.4	Ast	0.851332	-0.103884	4.1134	0.0450971	Inter_vs_Not_AD	Inter_vs_Not_AD	Ast
GRM5-AS1	Ast	-1.02654	-0.522825	5.79	0.0176889	Inter_vs_Not_AD	Inter_vs_Not_AD	Ast
SLC35F2	Ast	-0.556229	2.07074	4.25472	0.042386	Inter_vs_Not_AD	Inter_vs_Not_AD	Ast
C11orf87	Ast	-0.621958	1.68376	6.14823	0.0152256	Inter_vs_Not_AD	Inter_vs_Not_AD	Ast
AP002840.2	Ast	0.679859	0.391348	5.57301	0.0203858	Inter_vs_Not_AD	Inter_vs_Not_AD	Ast
CCDC84-DT	Ast	-0.513947	1.53346	6.46808	0.0128877	Inter_vs_Not_AD	Inter_vs_Not_AD	Ast
AP000866.2	Ast	-0.771484	-0.183518	6.17321	0.0145513	Inter_vs_Not_AD	Inter_vs_Not_AD	Ast
ROBO3	Ast	-0.500302	5.52972	4.45859	0.0378555	Inter_vs_Not_AD	Inter_vs_Not_AD	Ast
AP000708.1	Ast	-0.659671	1.02339	5.78853	0.0183006	Inter_vs_Not_AD	Inter_vs_Not_AD	Ast
AC006064.1	Ast	-0.716252	0.29183	5.61669	0.0198237	Inter_vs_Not_AD	Inter_vs_Not_AD	Ast
TPI1	Ast	0.508619	4.13348	4.39547	0.0392058	Inter_vs_Not_AD	Inter_vs_Not_AD	Ast
SLC2A14	Ast	-0.586851	-0.0909651	4.89539	0.0291785	Inter_vs_Not_AD	Inter_vs_Not_AD	Ast
PLBD1-AS1	Ast	-0.623692	2.59574	6.59991	0.0120658	Inter_vs_Not_AD	Inter_vs_Not_AD	Ast
AC007655.2	Ast	0.678402	0.246446	4.84761	0.0301194	Inter_vs_Not_AD	Inter_vs_Not_AD	Ast
AC048344.4	Ast	0.61949	0.586808	4.71448	0.0326059	Inter_vs_Not_AD	Inter_vs_Not_AD	Ast
AC140847.2	Ast	-1.42688	-0.291131	19.0512	2.96385206304126e-05	Inter_vs_Not_AD	Inter_vs_Not_AD	Ast
NR4A1	Ast	1.64224	3.4306	7.66731	0.0069946	Inter_vs_Not_AD	Inter_vs_Not_AD	Ast
NCKAP1L	Ast	-0.809594	0.02191	4.85147	0.029957	Inter_vs_Not_AD	Inter_vs_Not_AD	Ast
PDE1B	Ast	-0.585365	1.45863	4.55932	0.0357217	Inter_vs_Not_AD	Inter_vs_Not_AD	Ast
STAC3	Ast	-0.735659	1.61562	9.43685	0.00289208	Inter_vs_Not_AD	Inter_vs_Not_AD	Ast
TRHDE-AS1	Ast	-0.535588	0.855228	4.12332	0.0453906	Inter_vs_Not_AD	Inter_vs_Not_AD	Ast
SOCS2-AS1	Ast	-0.708163	1.46491	4.57999	0.0353149	Inter_vs_Not_AD	Inter_vs_Not_AD	Ast
AC073655.3	Ast	-1.30632	-0.483128	7.88755	0.00579323	Inter_vs_Not_AD	Inter_vs_Not_AD	Ast
EID3	Ast	0.811642	1.62622	4.52701	0.0364288	Inter_vs_Not_AD	Inter_vs_Not_AD	Ast
KSR2	Ast	-0.531138	5.06859	4.45224	0.0379895	Inter_vs_Not_AD	Inter_vs_Not_AD	Ast
TMED2-DT	Ast	0.53595	1.85544	7.87157	0.00630702	Inter_vs_Not_AD	Inter_vs_Not_AD	Ast
AC068790.3	Ast	0.903456	0.239272	6.8198	0.0104699	Inter_vs_Not_AD	Inter_vs_Not_AD	Ast
LINC02826	Ast	-1.19785	1.23634	7.90459	0.00611491	Inter_vs_Not_AD	Inter_vs_Not_AD	Ast
TNFRSF19	Ast	-0.898633	0.989357	7.12419	0.00909488	Inter_vs_Not_AD	Inter_vs_Not_AD	Ast
SOHLH2	Ast	-0.653557	2.31931	4.01928	0.0483717	Inter_vs_Not_AD	Inter_vs_Not_AD	Ast
SMAD9-IT1	Ast	-0.572011	1.08008	4.41002	0.0387195	Inter_vs_Not_AD	Inter_vs_Not_AD	Ast
AL162713.2	Ast	-0.624457	0.162101	4.67538	0.0330814	Inter_vs_Not_AD	Inter_vs_Not_AD	Ast
RCBTB2	Ast	-0.657387	3.00128	10.3656	0.00185963	Inter_vs_Not_AD	Inter_vs_Not_AD	Ast
MIR4500HG	Ast	-0.503599	2.04472	4.27501	0.0418975	Inter_vs_Not_AD	Inter_vs_Not_AD	Ast
HS6ST3	Ast	-0.599796	5.95483	5.73522	0.0189719	Inter_vs_Not_AD	Inter_vs_Not_AD	Ast
FGF14-AS1	Ast	-0.931252	-0.183805	4.22926	0.042194	Inter_vs_Not_AD	Inter_vs_Not_AD	Ast
LINC00551	Ast	0.627497	3.18584	5.18157	0.0255168	Inter_vs_Not_AD	Inter_vs_Not_AD	Ast
AL139384.1	Ast	-0.879077	-0.439123	4.48206	0.0364701	Inter_vs_Not_AD	Inter_vs_Not_AD	Ast
LTB4R	Ast	-0.634754	0.720581	4.24455	0.0423455	Inter_vs_Not_AD	Inter_vs_Not_AD	Ast
LINC02313	Ast	0.605048	-0.087521	4.52957	0.0357006	Inter_vs_Not_AD	Inter_vs_Not_AD	Ast
AL136298.1	Ast	-0.930618	2.23389	3.99822	0.0489225	Inter_vs_Not_AD	Inter_vs_Not_AD	Ast
AL392023.2	Ast	-0.589301	0.602122	4.49813	0.0367142	Inter_vs_Not_AD	Inter_vs_Not_AD	Ast
LINC00639	Ast	-0.636254	1.06919	4.72244	0.0325739	Inter_vs_Not_AD	Inter_vs_Not_AD	Ast
ESR2	Ast	-0.524902	3.15382	5.56479	0.0207794	Inter_vs_Not_AD	Inter_vs_Not_AD	Ast
SLC8A3	Ast	-0.732281	2.65533	4.58318	0.0353358	Inter_vs_Not_AD	Inter_vs_Not_AD	Ast
LINC01220	Ast	0.646442	0.881947	4.18668	0.0438747	Inter_vs_Not_AD	Inter_vs_Not_AD	Ast
FLVCR2	Ast	-0.667391	2.18821	5.56258	0.0208005	Inter_vs_Not_AD	Inter_vs_Not_AD	Ast
ZDHHC22	Ast	-0.592596	1.14227	6.59354	0.0120043	Inter_vs_Not_AD	Inter_vs_Not_AD	Ast
MEG9	Ast	-0.719364	-0.227525	4.01734	0.0476034	Inter_vs_Not_AD	Inter_vs_Not_AD	Ast
ADSSL1	Ast	0.664888	0.667112	5.39865	0.0224783	Inter_vs_Not_AD	Inter_vs_Not_AD	Ast
AC026150.1	Ast	0.616022	0.519969	5.7166	0.0189177	Inter_vs_Not_AD	Inter_vs_Not_AD	Ast
MYO1E	Ast	0.509212	5.82427	4.04492	0.0476808	Inter_vs_Not_AD	Inter_vs_Not_AD	Ast
AC037433.1	Ast	-1.24424	0.558417	4.47095	0.0370661	Inter_vs_Not_AD	Inter_vs_Not_AD	Ast
AC100830.1	Ast	-0.814427	2.3494	6.63706	0.0118307	Inter_vs_Not_AD	Inter_vs_Not_AD	Ast
NRG4	Ast	-0.626852	2.60683	4.45965	0.0378402	Inter_vs_Not_AD	Inter_vs_Not_AD	Ast
CHRNA5	Ast	-0.655667	1.06656	4.06411	0.0470018	Inter_vs_Not_AD	Inter_vs_Not_AD	Ast
RAMAC	Ast	0.504605	1.395	4.9513	0.0288589	Inter_vs_Not_AD	Inter_vs_Not_AD	Ast
MESP1	Ast	-0.590179	1.1111	9.24739	0.00314899	Inter_vs_Not_AD	Inter_vs_Not_AD	Ast
SLCO3A1	Ast	-0.60071	5.88882	4.79807	0.0314103	Inter_vs_Not_AD	Inter_vs_Not_AD	Ast
AC109597.1	Ast	-0.98535	0.163347	5.53328	0.0206611	Inter_vs_Not_AD	Inter_vs_Not_AD	Ast
EEF2K	Ast	0.534988	7.19301	5.82936	0.0180493	Inter_vs_Not_AD	Inter_vs_Not_AD	Ast
NPIPB9	Ast	1.1112	-0.0292576	7.57401	0.00701925	Inter_vs_Not_AD	Inter_vs_Not_AD	Ast
ATP2A1	Ast	-0.58037	2.16947	5.8198	0.0181425	Inter_vs_Not_AD	Inter_vs_Not_AD	Ast
CNGB1	Ast	-0.636512	0.462543	4.37868	0.0391521	Inter_vs_Not_AD	Inter_vs_Not_AD	Ast
AC009081.2	Ast	0.644616	-0.0369756	4.65683	0.0333051	Inter_vs_Not_AD	Inter_vs_Not_AD	Ast
CHST4	Ast	-0.929113	0.036943	6.46104	0.0125513	Inter_vs_Not_AD	Inter_vs_Not_AD	Ast
CENPN	Ast	0.581614	0.56623	4.64481	0.0338901	Inter_vs_Not_AD	Inter_vs_Not_AD	Ast
GINS2	Ast	-0.501917	0.992398	6.66654	0.011553	Inter_vs_Not_AD	Inter_vs_Not_AD	Ast
OR3A2	Ast	0.860805	2.42364	7.69844	0.00688904	Inter_vs_Not_AD	Inter_vs_Not_AD	Ast
SLC52A1	Ast	-0.571116	0.267611	3.9658	0.0493299	Inter_vs_Not_AD	Inter_vs_Not_AD	Ast
AC015908.3	Ast	-0.599908	3.37037	4.01577	0.0484807	Inter_vs_Not_AD	Inter_vs_Not_AD	Ast
AC015922.3	Ast	0.578488	0.497618	5.24052	0.0244266	Inter_vs_Not_AD	Inter_vs_Not_AD	Ast
AC104024.4	Ast	0.617572	0.9804	4.7975	0.031289	Inter_vs_Not_AD	Inter_vs_Not_AD	Ast
AC107982.3	Ast	0.630236	-0.025135	4.65199	0.0334144	Inter_vs_Not_AD	Inter_vs_Not_AD	Ast
ALDOC	Ast	0.560372	6.04091	4.64758	0.0341096	Inter_vs_Not_AD	Inter_vs_Not_AD	Ast
AC005726.3	Ast	-0.684209	1.60178	11.6352	0.00101273	Inter_vs_Not_AD	Inter_vs_Not_AD	Ast
SLFN5	Ast	-0.584132	2.1626	5.0904	0.0267855	Inter_vs_Not_AD	Inter_vs_Not_AD	Ast
SLFN12	Ast	-0.920254	0.0886429	6.32851	0.0134893	Inter_vs_Not_AD	Inter_vs_Not_AD	Ast
PIGW	Ast	-0.548826	0.506373	4.57073	0.0352123	Inter_vs_Not_AD	Inter_vs_Not_AD	Ast
PYY	Ast	-0.679883	0.779875	6.84164	0.0104978	Inter_vs_Not_AD	Inter_vs_Not_AD	Ast
AC126544.2	Ast	2.35255	0.298226	6.00067	0.016038	Inter_vs_Not_AD	Inter_vs_Not_AD	Ast
LRRC37A	Ast	0.716771	2.30933	5.53838	0.0210755	Inter_vs_Not_AD	Inter_vs_Not_AD	Ast
CHAD	Ast	-0.647056	1.02725	4.37543	0.0394466	Inter_vs_Not_AD	Inter_vs_Not_AD	Ast
MPO	Ast	-1.29058	-0.241251	8.43026	0.00448018	Inter_vs_Not_AD	Inter_vs_Not_AD	Ast
AC037487.1	Ast	-0.78226	1.33389	4.12111	0.0455044	Inter_vs_Not_AD	Inter_vs_Not_AD	Ast
ARSG	Ast	-0.666631	4.06505	4.8228	0.0309936	Inter_vs_Not_AD	Inter_vs_Not_AD	Ast
ABCA6	Ast	-0.599212	1.27454	5.15166	0.0258266	Inter_vs_Not_AD	Inter_vs_Not_AD	Ast
AC002546.1	Ast	-1.12471	-0.102243	7.94892	0.00578383	Inter_vs_Not_AD	Inter_vs_Not_AD	Ast
UBALD2	Ast	0.547595	3.23397	4.02846	0.0481358	Inter_vs_Not_AD	Inter_vs_Not_AD	Ast
AC132938.1	Ast	-0.62416	0.656408	9.98766	0.0021592	Inter_vs_Not_AD	Inter_vs_Not_AD	Ast
CLUL1	Ast	-0.744159	0.557841	4.7586	0.0317754	Inter_vs_Not_AD	Inter_vs_Not_AD	Ast
EPB41L3	Ast	-0.562209	4.52143	5.15865	0.025827	Inter_vs_Not_AD	Inter_vs_Not_AD	Ast
ARHGAP28	Ast	-0.605934	2.34774	5.22753	0.0248837	Inter_vs_Not_AD	Inter_vs_Not_AD	Ast
AP001099.1	Ast	-0.747376	0.767956	7.17347	0.00885253	Inter_vs_Not_AD	Inter_vs_Not_AD	Ast
ANKRD30B	Ast	-0.628085	1.45075	6.42998	0.0131123	Inter_vs_Not_AD	Inter_vs_Not_AD	Ast
AC068506.1	Ast	-0.825947	1.6484	4.95389	0.0287941	Inter_vs_Not_AD	Inter_vs_Not_AD	Ast
AC015961.2	Ast	-0.529372	1.31427	4.26643	0.0420136	Inter_vs_Not_AD	Inter_vs_Not_AD	Ast
MIR924HG	Ast	-0.86936	0.746901	7.68555	0.00679822	Inter_vs_Not_AD	Inter_vs_Not_AD	Ast
AC022726.2	Ast	-0.752683	0.396	3.98231	0.0488879	Inter_vs_Not_AD	Inter_vs_Not_AD	Ast
AC009802.1	Ast	-0.898086	-0.21681	6.18556	0.0144729	Inter_vs_Not_AD	Inter_vs_Not_AD	Ast
KCNG2	Ast	-0.983061	-0.272421	5.64161	0.0193063	Inter_vs_Not_AD	Inter_vs_Not_AD	Ast
BSG	Ast	0.622943	6.45296	8.49616	0.00461708	Inter_vs_Not_AD	Inter_vs_Not_AD	Ast
STXBP2	Ast	-0.73205	0.474931	8.84504	0.00376614	Inter_vs_Not_AD	Inter_vs_Not_AD	Ast
AC008686.1	Ast	-1.27259	-0.524211	11.0858	0.00116584	Inter_vs_Not_AD	Inter_vs_Not_AD	Ast
CYP4F3	Ast	-1.22419	3.60034	5.03401	0.0276342	Inter_vs_Not_AD	Inter_vs_Not_AD	Ast
JUND	Ast	0.52392	5.23434	4.12834	0.045499	Inter_vs_Not_AD	Inter_vs_Not_AD	Ast
HAPLN4	Ast	-0.716617	0.354712	4.39789	0.0386952	Inter_vs_Not_AD	Inter_vs_Not_AD	Ast
LINC01785	Ast	1.08266	0.738082	13.1867	0.0004781	Inter_vs_Not_AD	Inter_vs_Not_AD	Ast
FAAP24	Ast	-0.620584	0.276231	6.67436	0.0113194	Inter_vs_Not_AD	Inter_vs_Not_AD	Ast
CEBPA	Ast	0.746396	0.438105	4.80373	0.0309675	Inter_vs_Not_AD	Inter_vs_Not_AD	Ast
FXYD3	Ast	0.609035	2.92453	5.7064	0.0192747	Inter_vs_Not_AD	Inter_vs_Not_AD	Ast
DMKN	Ast	-1.04308	0.861151	6.98488	0.00973325	Inter_vs_Not_AD	Inter_vs_Not_AD	Ast
SELENOV	Ast	-1.40453	-0.110298	16.37	0.00010032	Inter_vs_Not_AD	Inter_vs_Not_AD	Ast
FCGBP	Ast	-0.604756	1.60618	6.51444	0.0125896	Inter_vs_Not_AD	Inter_vs_Not_AD	Ast
HIPK4	Ast	-1.06704	-0.171915	7.93455	0.00581373	Inter_vs_Not_AD	Inter_vs_Not_AD	Ast
ERFL	Ast	-0.67175	0.715841	5.90224	0.0171672	Inter_vs_Not_AD	Inter_vs_Not_AD	Ast
PSG3	Ast	-1.22572	-0.907195	4.50578	0.0355362	Inter_vs_Not_AD	Inter_vs_Not_AD	Ast
AC010524.1	Ast	1.69627	0.403693	7.51423	0.00731396	Inter_vs_Not_AD	Inter_vs_Not_AD	Ast
DKKL1	Ast	1.01651	-0.320285	3.97569	0.0485687	Inter_vs_Not_AD	Inter_vs_Not_AD	Ast
ZNF525	Ast	-0.563254	2.17734	7.7981	0.00654183	Inter_vs_Not_AD	Inter_vs_Not_AD	Ast
AC006116.11	Ast	-0.71561	-0.140316	4.66995	0.0329971	Inter_vs_Not_AD	Inter_vs_Not_AD	Ast
SLC4A11	Ast	-0.862334	1.79714	9.26225	0.00315753	Inter_vs_Not_AD	Inter_vs_Not_AD	Ast
CHGB	Ast	-0.618003	1.05671	5.2479	0.0244642	Inter_vs_Not_AD	Inter_vs_Not_AD	Ast
AL049647.1	Ast	-0.717963	-0.188933	4.14531	0.0442644	Inter_vs_Not_AD	Inter_vs_Not_AD	Ast
CST3	Ast	0.718304	8.38521	7.32996	0.00829261	Inter_vs_Not_AD	Inter_vs_Not_AD	Ast
MIR663AHG	Ast	-1.17211	0.238918	5.23005	0.0243516	Inter_vs_Not_AD	Inter_vs_Not_AD	Ast
AL031668.1	Ast	-0.998548	0.126479	6.20347	0.0144163	Inter_vs_Not_AD	Inter_vs_Not_AD	Ast
GDF5	Ast	0.813294	0.288482	9.02576	0.00342344	Inter_vs_Not_AD	Inter_vs_Not_AD	Ast
SDC4	Ast	0.624537	7.18722	8.26763	0.00517252	Inter_vs_Not_AD	Inter_vs_Not_AD	Ast
CDH22	Ast	-0.647545	2.45792	6.03898	0.0161652	Inter_vs_Not_AD	Inter_vs_Not_AD	Ast
U2AF1L5	Ast	1.68985	1.82947	6.9315	0.0101557	Inter_vs_Not_AD	Inter_vs_Not_AD	Ast
RBM11	Ast	-0.693123	0.755526	4.64183	0.0339351	Inter_vs_Not_AD	Inter_vs_Not_AD	Ast
ADAMTS5	Ast	-0.983112	-0.0633594	5.99448	0.0160425	Inter_vs_Not_AD	Inter_vs_Not_AD	Ast
GRIK1-AS1	Ast	0.536897	2.95172	4.0352	0.0479576	Inter_vs_Not_AD	Inter_vs_Not_AD	Ast
MRAP	Ast	-0.699348	-0.00469439	4.35722	0.0393396	Inter_vs_Not_AD	Inter_vs_Not_AD	Ast
KCNE2	Ast	1.11346	1.17598	8.25572	0.0051741	Inter_vs_Not_AD	Inter_vs_Not_AD	Ast
LRRC3	Ast	0.825435	0.416353	5.8379	0.0177018	Inter_vs_Not_AD	Inter_vs_Not_AD	Ast
TUBA8	Ast	-0.572922	1.48452	7.16867	0.0089699	Inter_vs_Not_AD	Inter_vs_Not_AD	Ast
AC007326.5	Ast	1.04524	1.29866	5.42603	0.0222445	Inter_vs_Not_AD	Inter_vs_Not_AD	Ast
AL022323.2	Ast	-1.00321	0.109416	5.34734	0.0228273	Inter_vs_Not_AD	Inter_vs_Not_AD	Ast
CASTOR1	Ast	0.586937	3.69952	4.62805	0.0344834	Inter_vs_Not_AD	Inter_vs_Not_AD	Ast
HMOX1	Ast	1.70285	2.14044	5.02728	0.0276105	Inter_vs_Not_AD	Inter_vs_Not_AD	Ast
Z83844.2	Ast	-0.912856	0.0392517	9.55521	0.00258129	Inter_vs_Not_AD	Inter_vs_Not_AD	Ast
MAFF	Ast	1.04117	2.53005	4.82626	0.030946	Inter_vs_Not_AD	Inter_vs_Not_AD	Ast
PRR34	Ast	-0.684339	0.257705	5.23012	0.024404	Inter_vs_Not_AD	Inter_vs_Not_AD	Ast
C22orf34	Ast	-0.749667	0.15577	7.33301	0.00802226	Inter_vs_Not_AD	Inter_vs_Not_AD	Ast
IL3RA	Ast	-0.5846	4.94632	4.22477	0.0431099	Inter_vs_Not_AD	Inter_vs_Not_AD	Ast
AL683807.1	Ast	-0.901531	-0.093281	7.2092	0.00843641	Inter_vs_Not_AD	Inter_vs_Not_AD	Ast
DHRSX-IT1	Ast	0.67958	-0.0844736	4.008	0.0479031	Inter_vs_Not_AD	Inter_vs_Not_AD	Ast
PGK1	Ast	0.559047	5.34973	5.18665	0.025438	Inter_vs_Not_AD	Inter_vs_Not_AD	Ast
AL117327.1	Ast	-0.857158	0.449748	5.83243	0.0177072	Inter_vs_Not_AD	Inter_vs_Not_AD	Ast
TSC22D3	Ast	0.669007	4.51569	6.63428	0.0118498	Inter_vs_Not_AD	Inter_vs_Not_AD	Ast
COL4A6	Ast	-0.631748	3.18677	4.51966	0.0366095	Inter_vs_Not_AD	Inter_vs_Not_AD	Ast
LONRF3	Ast	0.636896	4.7986	7.59107	0.00726468	Inter_vs_Not_AD	Inter_vs_Not_AD	Ast
AL031073.2	Ast	0.892655	1.098	6.21557	0.0146251	Inter_vs_Not_AD	Inter_vs_Not_AD	Ast
SLC10A3	Ast	0.768145	0.0775508	7.10898	0.00896809	Inter_vs_Not_AD	Inter_vs_Not_AD	Ast
DDX3Y	Ast	0.623012	3.66754	6.33785	0.0141866	Inter_vs_Not_AD	Inter_vs_Not_AD	Ast
MT-ND1	Ast	1.97405	6.91951	9.0481	0.00351677	Inter_vs_Not_AD	Inter_vs_Not_AD	Ast
MT-ND2	Ast	1.91988	6.75174	9.68903	0.00257301	Inter_vs_Not_AD	Inter_vs_Not_AD	Ast
MT-CO1	Ast	1.30613	7.05966	8.20198	0.00534467	Inter_vs_Not_AD	Inter_vs_Not_AD	Ast
MT-CO2	Ast	1.92184	7.943	9.27668	0.00314451	Inter_vs_Not_AD	Inter_vs_Not_AD	Ast
MT-ATP8	Ast	1.902	4.29685	8.73609	0.00410223	Inter_vs_Not_AD	Inter_vs_Not_AD	Ast
MT-ATP6	Ast	2.38666	7.91254	10.4578	0.00177733	Inter_vs_Not_AD	Inter_vs_Not_AD	Ast
MT-CO3	Ast	1.97017	8.00604	9.04688	0.00351884	Inter_vs_Not_AD	Inter_vs_Not_AD	Ast
MT-ND3	Ast	2.67954	8.10033	11.0049	0.00137003	Inter_vs_Not_AD	Inter_vs_Not_AD	Ast
MT-ND4L	Ast	1.59344	4.59717	7.63765	0.00709624	Inter_vs_Not_AD	Inter_vs_Not_AD	Ast
MT-ND4	Ast	2.19317	7.70761	10.5723	0.00168274	Inter_vs_Not_AD	Inter_vs_Not_AD	Ast
MT-ND5	Ast	1.53527	5.57215	8.75937	0.00405362	Inter_vs_Not_AD	Inter_vs_Not_AD	Ast
MT-CYB	Ast	2.18961	7.49644	9.81145	0.00242494	Inter_vs_Not_AD	Inter_vs_Not_AD	Ast
LINC02593	Ast	-1.23895	0.560196	7.7543	0.00651426	High_vs_Not_AD	High_vs_Not_AD	Ast
SAMD11	Ast	-0.862972	3.18606	6.24888	0.014485	High_vs_Not_AD	High_vs_Not_AD	Ast
AURKAIP1	Ast	-0.614896	2.81654	7.8517	0.00637501	High_vs_Not_AD	High_vs_Not_AD	Ast
AL139246.5	Ast	0.86747	1.44158	5.05056	0.0273166	High_vs_Not_AD	High_vs_Not_AD	Ast
AJAP1	Ast	1.59191	3.65633	10.0982	0.00211354	High_vs_Not_AD	High_vs_Not_AD	Ast
SLC2A5	Ast	-1.52405	1.28974	19.1149	3.47428804479005e-05	High_vs_Not_AD	High_vs_Not_AD	Ast
FBXO2	Ast	0.624086	5.52736	3.98052	0.0494429	High_vs_Not_AD	High_vs_Not_AD	Ast
KAZN	Ast	-0.706461	8.08883	6.45437	0.0130072	High_vs_Not_AD	High_vs_Not_AD	Ast
AL357873.1	Ast	-0.874986	1.2195	4.65121	0.033863	High_vs_Not_AD	High_vs_Not_AD	Ast
KAZN-AS1	Ast	-0.852182	1.17459	4.06136	0.0470521	High_vs_Not_AD	High_vs_Not_AD	Ast
FHAD1	Ast	0.629067	1.97709	4.86633	0.030265	High_vs_Not_AD	High_vs_Not_AD	Ast
UQCRHL	Ast	0.608225	2.54347	5.20096	0.0252565	High_vs_Not_AD	High_vs_Not_AD	Ast
HSPB7	Ast	1.39911	-0.16602	6.56778	0.0117027	High_vs_Not_AD	High_vs_Not_AD	Ast
CLCNKA	Ast	1.17109	-0.630477	5.07359	0.0260112	High_vs_Not_AD	High_vs_Not_AD	Ast
FAM131C	Ast	0.802341	2.50407	8.79619	0.00398582	High_vs_Not_AD	High_vs_Not_AD	Ast
CROCC	Ast	0.52423	5.36423	6.44754	0.0130539	High_vs_Not_AD	High_vs_Not_AD	Ast
MICOS10	Ast	-0.753105	4.61734	18.833	4.1459028429448e-05	High_vs_Not_AD	High_vs_Not_AD	Ast
C1QB	Ast	1.21171	0.158076	6.40206	0.0129889	High_vs_Not_AD	High_vs_Not_AD	Ast
RPL11	Ast	-0.858029	4.92992	15.2919	0.000192387	High_vs_Not_AD	High_vs_Not_AD	Ast
AL020996.1	Ast	-0.536838	0.877635	4.34235	0.0401565	High_vs_Not_AD	High_vs_Not_AD	Ast
EXTL1	Ast	0.573689	1.64271	5.90899	0.0172865	High_vs_Not_AD	High_vs_Not_AD	Ast
HMGN2	Ast	-0.677955	4.61966	6.88121	0.010433	High_vs_Not_AD	High_vs_Not_AD	Ast
XKR8	Ast	0.780702	2.08568	18.142	5.58279301618099e-05	High_vs_Not_AD	High_vs_Not_AD	Ast
AL360012.1	Ast	1.38089	1.12035	11.4818	0.00107064	High_vs_Not_AD	High_vs_Not_AD	Ast
TMEM200B	Ast	1.35087	-0.28597	11.1538	0.00113633	High_vs_Not_AD	High_vs_Not_AD	Ast
AL390839.1	Ast	0.919689	-0.0210843	4.35412	0.0394389	High_vs_Not_AD	High_vs_Not_AD	Ast
MFSD2A	Ast	-0.932336	2.2669	5.07748	0.0269846	High_vs_Not_AD	High_vs_Not_AD	Ast
KCNQ4	Ast	0.887569	1.73223	7.55748	0.00737838	High_vs_Not_AD	High_vs_Not_AD	Ast
AC093151.8	Ast	-2.0701	2.11595	6.93392	0.0100616	High_vs_Not_AD	High_vs_Not_AD	Ast
AC098484.4	Ast	-0.523805	2.7402	4.49185	0.0371734	High_vs_Not_AD	High_vs_Not_AD	Ast
ELOVL1	Ast	0.669226	3.03504	10.7797	0.00152677	High_vs_Not_AD	High_vs_Not_AD	Ast
SLC6A9	Ast	0.770826	2.927	4.28997	0.0415824	High_vs_Not_AD	High_vs_Not_AD	Ast
RNF220	Ast	0.501415	7.30461	7.41064	0.00795952	High_vs_Not_AD	High_vs_Not_AD	Ast
RPS8	Ast	-0.677141	4.49655	12.5757	0.000657645	High_vs_Not_AD	High_vs_Not_AD	Ast
EFCAB14-AS1	Ast	-0.976766	0.520503	7.88546	0.00608496	High_vs_Not_AD	High_vs_Not_AD	Ast
CYP4X1	Ast	-0.57207	1.17529	4.30876	0.0409488	High_vs_Not_AD	High_vs_Not_AD	Ast
AC099788.1	Ast	-1.06401	2.83759	6.33686	0.0138317	High_vs_Not_AD	High_vs_Not_AD	Ast
DHCR24	Ast	-0.940906	2.9603	7.6323	0.00711975	High_vs_Not_AD	High_vs_Not_AD	Ast
AC096536.3	Ast	-1.40918	-0.0355225	6.80185	0.0104407	High_vs_Not_AD	High_vs_Not_AD	Ast
AC093425.1	Ast	-0.79203	1.23879	5.507	0.0213305	High_vs_Not_AD	High_vs_Not_AD	Ast
LINC01739	Ast	0.634546	2.61904	4.92094	0.0293867	High_vs_Not_AD	High_vs_Not_AD	Ast
AL139294.1	Ast	-0.80803	3.07028	5.03398	0.0276365	High_vs_Not_AD	High_vs_Not_AD	Ast
AL133320.2	Ast	0.962087	-0.0981244	8.92775	0.00351004	High_vs_Not_AD	High_vs_Not_AD	Ast
LRRC7	Ast	-0.791339	6.86332	7.81531	0.00648726	High_vs_Not_AD	High_vs_Not_AD	Ast
IFI44L	Ast	-0.99043	3.5744	4.50529	0.0368998	High_vs_Not_AD	High_vs_Not_AD	Ast
LINC01725	Ast	-0.580413	4.4272	4.7779	0.031761	High_vs_Not_AD	High_vs_Not_AD	Ast
AL078459.1	Ast	-0.743169	5.79675	6.06258	0.0159622	High_vs_Not_AD	High_vs_Not_AD	Ast
LRRC8C	Ast	0.500534	4.40282	4.37205	0.0397171	High_vs_Not_AD	High_vs_Not_AD	Ast
AC098656.1	Ast	-1.50628	1.50353	5.45165	0.0219323	High_vs_Not_AD	High_vs_Not_AD	Ast
AL627316.1	Ast	-1.23294	3.68663	5.35601	0.0232279	High_vs_Not_AD	High_vs_Not_AD	Ast
AL109613.1	Ast	-0.730437	0.720297	4.99608	0.0279336	High_vs_Not_AD	High_vs_Not_AD	Ast
ABCA4	Ast	0.911358	2.24129	8.38176	0.00489201	High_vs_Not_AD	High_vs_Not_AD	Ast
ARHGAP29	Ast	0.888772	6.31768	8.52005	0.00456273	High_vs_Not_AD	High_vs_Not_AD	Ast
PALMD	Ast	-0.94996	0.404068	8.35253	0.00479548	High_vs_Not_AD	High_vs_Not_AD	Ast
AL589990.1	Ast	-0.845119	2.40182	4.23845	0.0427679	High_vs_Not_AD	High_vs_Not_AD	Ast
AL109741.1	Ast	-0.71572	0.966434	8.4665	0.00462313	High_vs_Not_AD	High_vs_Not_AD	Ast
AL591888.1	Ast	1.9537	0.500273	12.8394	0.000536384	High_vs_Not_AD	High_vs_Not_AD	Ast
PRMT6	Ast	0.626064	1.65279	4.66584	0.0337612	High_vs_Not_AD	High_vs_Not_AD	Ast
AL356488.2	Ast	1.40322	2.64729	13.1371	0.000509301	High_vs_Not_AD	High_vs_Not_AD	Ast
RBM15-AS1	Ast	0.554038	3.14502	5.60143	0.0203786	High_vs_Not_AD	High_vs_Not_AD	Ast
OVGP1	Ast	-0.631449	2.01036	5.63936	0.0199599	High_vs_Not_AD	High_vs_Not_AD	Ast
INKA2-AS1	Ast	1.31472	-0.0576128	12.0757	0.000746928	High_vs_Not_AD	High_vs_Not_AD	Ast
AL445426.1	Ast	0.502272	7.27561	4.19924	0.0437279	High_vs_Not_AD	High_vs_Not_AD	Ast
AL390242.1	Ast	-0.668607	2.14453	4.91029	0.0295347	High_vs_Not_AD	High_vs_Not_AD	Ast
AP4B1-AS1	Ast	-0.568918	1.28752	4.33427	0.0404479	High_vs_Not_AD	High_vs_Not_AD	Ast
NGF	Ast	1.45094	0.405054	12.9011	0.000526611	High_vs_Not_AD	High_vs_Not_AD	Ast
IGSF3	Ast	-0.651001	0.611004	6.97105	0.00978016	High_vs_Not_AD	High_vs_Not_AD	Ast
TBX15	Ast	-0.97338	0.0340182	7.21801	0.0084739	High_vs_Not_AD	High_vs_Not_AD	Ast
LINC01780	Ast	-0.678305	0.0357704	4.8594	0.0298284	High_vs_Not_AD	High_vs_Not_AD	Ast
FP700111.1	Ast	0.973122	-0.129124	6.98172	0.00951027	High_vs_Not_AD	High_vs_Not_AD	Ast
PDE4DIP	Ast	0.515348	8.30806	6.12165	0.0154746	High_vs_Not_AD	High_vs_Not_AD	Ast
C1orf54	Ast	-0.530692	5.04011	10.9455	0.00140933	High_vs_Not_AD	High_vs_Not_AD	Ast
AL358472.4	Ast	-0.723381	0.0085334	6.46535	0.0125305	High_vs_Not_AD	High_vs_Not_AD	Ast
RPS27	Ast	-1.2937	5.5498	16.6665	0.000105114	High_vs_Not_AD	High_vs_Not_AD	Ast
SHE	Ast	0.873186	2.84991	14.3642	0.000291786	High_vs_Not_AD	High_vs_Not_AD	Ast
SHC1	Ast	-0.716086	4.12459	6.86763	0.0105072	High_vs_Not_AD	High_vs_Not_AD	Ast
KRTCAP2	Ast	-0.547796	3.23571	9.88003	0.00234842	High_vs_Not_AD	High_vs_Not_AD	Ast
AL353807.5	Ast	-1.12143	1.72166	5.01587	0.0278152	High_vs_Not_AD	High_vs_Not_AD	Ast
ARHGEF2	Ast	0.720374	3.578	4.11529	0.0458414	High_vs_Not_AD	High_vs_Not_AD	Ast
TSACC	Ast	-0.700998	0.901206	7.20502	0.00873971	High_vs_Not_AD	High_vs_Not_AD	Ast
AL590666.2	Ast	-0.887447	-0.239458	6.35056	0.0132153	High_vs_Not_AD	High_vs_Not_AD	Ast
NES	Ast	1.11326	0.608426	12.5027	0.000647866	High_vs_Not_AD	High_vs_Not_AD	Ast
NTRK1	Ast	-0.745551	0.468681	6.48541	0.0125413	High_vs_Not_AD	High_vs_Not_AD	Ast
CADM3	Ast	0.626602	5.28968	7.93087	0.00612155	High_vs_Not_AD	High_vs_Not_AD	Ast
KCNJ10	Ast	0.626509	6.6402	4.65409	0.0339879	High_vs_Not_AD	High_vs_Not_AD	Ast
HSPA6	Ast	-1.921	0.355946	5.42634	0.0215282	High_vs_Not_AD	High_vs_Not_AD	Ast
FAM78B	Ast	0.548353	4.08243	4.04059	0.0478016	High_vs_Not_AD	High_vs_Not_AD	Ast
AL596087.2	Ast	1.06837	1.92909	4.73402	0.0324982	High_vs_Not_AD	High_vs_Not_AD	Ast
AL136984.1	Ast	0.535168	1.748	4.40792	0.038926	High_vs_Not_AD	High_vs_Not_AD	Ast
MROH9	Ast	-1.10861	0.522561	8.87873	0.00368463	High_vs_Not_AD	High_vs_Not_AD	Ast
TNFSF18	Ast	0.769052	0.32294	4.78026	0.0313336	High_vs_Not_AD	High_vs_Not_AD	Ast
AL161734.2	Ast	0.904458	0.691806	5.63024	0.0197851	High_vs_Not_AD	High_vs_Not_AD	Ast
AL445228.2	Ast	-0.635967	0.19429	4.14057	0.044668	High_vs_Not_AD	High_vs_Not_AD	Ast
AL136456.1	Ast	0.886678	2.81634	12.8322	0.000585503	High_vs_Not_AD	High_vs_Not_AD	Ast
CSRP1	Ast	0.563933	7.38217	8.78383	0.00400481	High_vs_Not_AD	High_vs_Not_AD	Ast
AL645504.1	Ast	-0.898436	0.188879	5.86701	0.0172809	High_vs_Not_AD	High_vs_Not_AD	Ast
AL513217.1	Ast	-0.73975	3.69762	7.70308	0.00686794	High_vs_Not_AD	High_vs_Not_AD	Ast
GPR37L1	Ast	0.731225	6.49763	8.31994	0.00503954	High_vs_Not_AD	High_vs_Not_AD	Ast
PTPN7	Ast	-1.12514	2.4611	6.57708	0.0121986	High_vs_Not_AD	High_vs_Not_AD	Ast
LGR6	Ast	1.8441	2.99161	6.15234	0.0152022	High_vs_Not_AD	High_vs_Not_AD	Ast
ADORA1	Ast	0.8588	4.84345	8.3725	0.00490998	High_vs_Not_AD	High_vs_Not_AD	Ast
AC105940.2	Ast	0.750719	-0.27363	3.95417	0.0492174	High_vs_Not_AD	High_vs_Not_AD	Ast
PRELP	Ast	0.927745	3.48963	7.0107	0.00976531	High_vs_Not_AD	High_vs_Not_AD	Ast
ATP2B4	Ast	0.611834	8.31982	8.30886	0.00506736	High_vs_Not_AD	High_vs_Not_AD	Ast
NFASC	Ast	-0.556003	6.87096	5.34581	0.0233506	High_vs_Not_AD	High_vs_Not_AD	Ast
CNTN2	Ast	0.504287	2.71577	5.67769	0.0195695	High_vs_Not_AD	High_vs_Not_AD	Ast
CDK18	Ast	0.553578	4.53131	4.12003	0.0457129	High_vs_Not_AD	High_vs_Not_AD	Ast
RHEX	Ast	1.40565	0.0942702	5.51501	0.0207659	High_vs_Not_AD	High_vs_Not_AD	Ast
PFKFB2	Ast	-0.613396	6.0881	4.65782	0.0339184	High_vs_Not_AD	High_vs_Not_AD	Ast
CR1L	Ast	1.15036	1.44885	9.63658	0.00262598	High_vs_Not_AD	High_vs_Not_AD	Ast
LAMB3	Ast	-0.868159	0.187074	11.9348	0.000820862	High_vs_Not_AD	High_vs_Not_AD	Ast
HSD11B1-AS1	Ast	-0.567183	2.80764	7.03445	0.00964982	High_vs_Not_AD	High_vs_Not_AD	Ast
G0S2	Ast	-1.8831	1.06322	12.396	0.000685888	High_vs_Not_AD	High_vs_Not_AD	Ast
TRAF3IP3	Ast	-0.798278	0.25405	6.21455	0.0143878	High_vs_Not_AD	High_vs_Not_AD	Ast
BATF3	Ast	-0.688274	0.384148	4.88584	0.0295539	High_vs_Not_AD	High_vs_Not_AD	Ast
SMYD2	Ast	-0.578393	2.65579	7.38797	0.00805802	High_vs_Not_AD	High_vs_Not_AD	Ast
C1orf143	Ast	0.737139	1.45702	8.2305	0.00525125	High_vs_Not_AD	High_vs_Not_AD	Ast
ZC3H11B	Ast	0.748617	0.520419	5.46454	0.0216493	High_vs_Not_AD	High_vs_Not_AD	Ast
FAM177B	Ast	1.01531	-0.250919	4.04294	0.0467464	High_vs_Not_AD	High_vs_Not_AD	Ast
AL591895.1	Ast	-0.565885	3.13899	9.46367	0.00287353	High_vs_Not_AD	High_vs_Not_AD	Ast
AL670729.2	Ast	2.23088	0.365216	14.7227	0.000220153	High_vs_Not_AD	High_vs_Not_AD	Ast
LINC02815	Ast	-1.29331	0.715782	10.3435	0.00181196	High_vs_Not_AD	High_vs_Not_AD	Ast
LINC02814	Ast	-1.07668	4.51751	10.0628	0.0021488	High_vs_Not_AD	High_vs_Not_AD	Ast
AL512328.1	Ast	-0.852406	2.44672	7.0182	0.0097239	High_vs_Not_AD	High_vs_Not_AD	Ast
LINC01354	Ast	0.676887	3.33719	7.5936	0.00725947	High_vs_Not_AD	High_vs_Not_AD	Ast
ACTN2	Ast	-0.726866	4.54596	4.8252	0.0309506	High_vs_Not_AD	High_vs_Not_AD	Ast
AL356010.2	Ast	0.823837	-0.0770313	6.60899	0.0115908	High_vs_Not_AD	High_vs_Not_AD	Ast
AL591686.1	Ast	1.54856	-0.0855032	6.85502	0.010072	High_vs_Not_AD	High_vs_Not_AD	Ast
AC118555.1	Ast	-0.930129	1.15949	6.0732	0.0157455	High_vs_Not_AD	High_vs_Not_AD	Ast
AC104335.1	Ast	-0.835359	1.91568	6.17103	0.0150467	High_vs_Not_AD	High_vs_Not_AD	Ast
OR2L2	Ast	0.872393	0.852379	7.308	0.00828848	High_vs_Not_AD	High_vs_Not_AD	Ast
ALKAL2	Ast	-0.993931	-0.0916129	4.39746	0.0384487	High_vs_Not_AD	High_vs_Not_AD	Ast
LINC01865	Ast	0.940707	-0.210762	4.115	0.0449633	High_vs_Not_AD	High_vs_Not_AD	Ast
RPS7	Ast	-0.757743	4.27963	13.5107	0.000428505	High_vs_Not_AD	High_vs_Not_AD	Ast
SOX11	Ast	-1.54582	-0.278491	7.98733	0.00558376	High_vs_Not_AD	High_vs_Not_AD	Ast
AC092617.1	Ast	-0.620452	0.526765	4.95363	0.0285179	High_vs_Not_AD	High_vs_Not_AD	Ast
ID2-AS1	Ast	-0.755642	3.00918	6.23185	0.0146142	High_vs_Not_AD	High_vs_Not_AD	Ast
CYS1	Ast	0.592161	3.48872	4.72598	0.0326817	High_vs_Not_AD	High_vs_Not_AD	Ast
NT5C1B	Ast	-0.850751	-0.394469	5.00223	0.0272708	High_vs_Not_AD	High_vs_Not_AD	Ast
AC096570.1	Ast	0.510061	0.654508	4.05879	0.0470228	High_vs_Not_AD	High_vs_Not_AD	Ast
AC096570.2	Ast	1.54461	0.117937	10.45	0.00165388	High_vs_Not_AD	High_vs_Not_AD	Ast
AC010896.1	Ast	-0.599114	0.357006	4.7846	0.031241	High_vs_Not_AD	High_vs_Not_AD	Ast
AC013472.2	Ast	-0.654957	1.24275	4.411	0.0387512	High_vs_Not_AD	High_vs_Not_AD	Ast
OST4	Ast	-0.900406	3.2572	10.4912	0.00175129	High_vs_Not_AD	High_vs_Not_AD	Ast
C2orf16	Ast	-1.04666	1.87357	7.58085	0.00729448	High_vs_Not_AD	High_vs_Not_AD	Ast
AL121652.1	Ast	0.567934	0.29976	4.12944	0.0450272	High_vs_Not_AD	High_vs_Not_AD	Ast
LINC01320	Ast	0.603561	3.20348	5.29039	0.0240648	High_vs_Not_AD	High_vs_Not_AD	Ast
AC007390.2	Ast	0.509756	2.31685	8.23136	0.00527225	High_vs_Not_AD	High_vs_Not_AD	Ast
PKDCC	Ast	0.630724	3.15222	4.90251	0.0296809	High_vs_Not_AD	High_vs_Not_AD	Ast
HAAO	Ast	-0.567072	1.63275	5.84832	0.0178265	High_vs_Not_AD	High_vs_Not_AD	Ast
RHOQ	Ast	0.526507	6.96726	5.77424	0.0185835	High_vs_Not_AD	High_vs_Not_AD	Ast
FSHR	Ast	0.676928	0.00358621	4.49522	0.0364383	High_vs_Not_AD	High_vs_Not_AD	Ast
AC068725.1	Ast	-0.866493	3.25207	5.93791	0.017051	High_vs_Not_AD	High_vs_Not_AD	Ast
AC007682.1	Ast	-1.14842	2.68989	8.61736	0.00434713	High_vs_Not_AD	High_vs_Not_AD	Ast
AC092839.1	Ast	-0.719143	3.91938	4.18269	0.0441412	High_vs_Not_AD	High_vs_Not_AD	Ast
RPS27A	Ast	-0.941675	4.29439	15.4975	0.00017573	High_vs_Not_AD	High_vs_Not_AD	Ast
EFEMP1	Ast	-0.504009	8.32268	4.63811	0.0342874	High_vs_Not_AD	High_vs_Not_AD	Ast
CCDC85A	Ast	-1.01133	5.54106	6.37651	0.0135453	High_vs_Not_AD	High_vs_Not_AD	Ast
AC007179.1	Ast	2.7291	0.484688	18.9676	3.23632570059216e-05	High_vs_Not_AD	High_vs_Not_AD	Ast
AC107081.2	Ast	-0.725033	0.741791	6.29501	0.0139614	High_vs_Not_AD	High_vs_Not_AD	Ast
LINC01828	Ast	-0.976618	-0.34778	6.07371	0.0152292	High_vs_Not_AD	High_vs_Not_AD	Ast
AC007881.4	Ast	-1.01005	0.0118196	6.55913	0.0119214	High_vs_Not_AD	High_vs_Not_AD	Ast
CYP26B1	Ast	1.29531	0.144879	7.32977	0.00794692	High_vs_Not_AD	High_vs_Not_AD	Ast
AC073263.1	Ast	0.510116	2.44092	5.49232	0.0216015	High_vs_Not_AD	High_vs_Not_AD	Ast
AC073091.4	Ast	-0.676205	0.729524	4.92096	0.0290939	High_vs_Not_AD	High_vs_Not_AD	Ast
TMSB10	Ast	-0.635069	3.67899	4.34096	0.0404144	High_vs_Not_AD	High_vs_Not_AD	Ast
RNF181	Ast	-0.796923	1.83107	10.3317	0.00188376	High_vs_Not_AD	High_vs_Not_AD	Ast
RGPD1	Ast	-0.65584	1.35113	4.54942	0.035912	High_vs_Not_AD	High_vs_Not_AD	Ast
AC068279.2	Ast	1.36642	0.523624	7.26061	0.008357	High_vs_Not_AD	High_vs_Not_AD	Ast
CNGA3	Ast	-0.959755	0.296866	4.7223	0.0322342	High_vs_Not_AD	High_vs_Not_AD	Ast
AC104655.1	Ast	-0.837308	-0.00690269	7.65491	0.00674174	High_vs_Not_AD	High_vs_Not_AD	Ast
AC018878.1	Ast	-0.780667	0.184782	4.52798	0.0358975	High_vs_Not_AD	High_vs_Not_AD	Ast
RGPD3	Ast	0.870376	0.0307053	7.34873	0.00790631	High_vs_Not_AD	High_vs_Not_AD	Ast
ST6GAL2	Ast	-0.770807	4.80859	6.76887	0.011054	High_vs_Not_AD	High_vs_Not_AD	Ast
AC016994.1	Ast	-1.08476	-0.622991	4.75505	0.0311388	High_vs_Not_AD	High_vs_Not_AD	Ast
LINC01885	Ast	0.799733	-0.10481	8.81424	0.00371872	High_vs_Not_AD	High_vs_Not_AD	Ast
EDAR	Ast	-0.857347	0.484374	7.62849	0.00695317	High_vs_Not_AD	High_vs_Not_AD	Ast
MTLN	Ast	-0.673393	2.83412	8.71613	0.0041456	High_vs_Not_AD	High_vs_Not_AD	Ast
AC016745.1	Ast	1.49009	5.56961	8.71516	0.00414303	High_vs_Not_AD	High_vs_Not_AD	Ast
DPP10	Ast	-0.838847	12.5452	9.09583	0.00343539	High_vs_Not_AD	High_vs_Not_AD	Ast
DPP10-AS3	Ast	-1.50751	5.5545	7.46414	0.00774681	High_vs_Not_AD	High_vs_Not_AD	Ast
AC093610.1	Ast	-1.55727	5.05495	8.69221	0.00419083	High_vs_Not_AD	High_vs_Not_AD	Ast
DPP10-AS1	Ast	-1.45732	4.6992	8.2457	0.00523068	High_vs_Not_AD	High_vs_Not_AD	Ast
AC016721.1	Ast	-0.833277	0.311798	6.57105	0.0119319	High_vs_Not_AD	High_vs_Not_AD	Ast
AC009312.1	Ast	1.22128	-0.360496	10.8343	0.00132537	High_vs_Not_AD	High_vs_Not_AD	Ast
THORLNC	Ast	-0.782242	-0.558834	4.33276	0.0395083	High_vs_Not_AD	High_vs_Not_AD	Ast
C1QL2	Ast	0.994809	1.71845	6.26104	0.0143684	High_vs_Not_AD	High_vs_Not_AD	Ast
CFAP221	Ast	-0.505405	5.34074	5.95324	0.0169074	High_vs_Not_AD	High_vs_Not_AD	Ast
INHBB	Ast	0.574419	3.56015	6.51512	0.0126079	High_vs_Not_AD	High_vs_Not_AD	Ast
TFCP2L1	Ast	0.618838	3.6268	4.27601	0.0419007	High_vs_Not_AD	High_vs_Not_AD	Ast
AC012447.1	Ast	0.882551	2.31191	9.54388	0.00276555	High_vs_Not_AD	High_vs_Not_AD	Ast
GYPC	Ast	-0.649428	0.652696	4.11946	0.0453842	High_vs_Not_AD	High_vs_Not_AD	Ast
LINC02572	Ast	-0.561448	1.51182	6.17642	0.0150008	High_vs_Not_AD	High_vs_Not_AD	Ast
AC010974.1	Ast	-0.875387	0.0207667	6.55651	0.011959	High_vs_Not_AD	High_vs_Not_AD	Ast
ARHGAP15	Ast	0.676522	1.98535	5.65793	0.0197515	High_vs_Not_AD	High_vs_Not_AD	Ast
AC092652.1	Ast	-1.01116	-0.399125	6.04773	0.0154628	High_vs_Not_AD	High_vs_Not_AD	Ast
AC016910.1	Ast	-1.01622	0.776846	6.49087	0.0125724	High_vs_Not_AD	High_vs_Not_AD	Ast
AC009951.5	Ast	-0.851123	-0.279995	4.80479	0.0305312	High_vs_Not_AD	High_vs_Not_AD	Ast
AC009951.6	Ast	-0.689582	1.59665	6.9099	0.0102624	High_vs_Not_AD	High_vs_Not_AD	Ast
AC105402.3	Ast	1.97899	3.01136	4.42887	0.0383674	High_vs_Not_AD	High_vs_Not_AD	Ast
LYPD6	Ast	0.516335	6.36048	5.1197	0.0263738	High_vs_Not_AD	High_vs_Not_AD	Ast
AC023469.1	Ast	2.63075	3.42054	21.4191	1.41396738970098e-05	High_vs_Not_AD	High_vs_Not_AD	Ast
AC012066.2	Ast	-0.756413	0.652303	7.08423	0.00922815	High_vs_Not_AD	High_vs_Not_AD	Ast
AC012501.2	Ast	0.639403	0.234916	6.29772	0.013791	High_vs_Not_AD	High_vs_Not_AD	Ast
GALNT13	Ast	-0.791464	4.55568	8.29748	0.00509721	High_vs_Not_AD	High_vs_Not_AD	Ast
AC061961.1	Ast	-0.678299	0.951982	4.95178	0.028696	High_vs_Not_AD	High_vs_Not_AD	Ast
LINC01876	Ast	-1.15233	4.07509	4.39468	0.0392245	High_vs_Not_AD	High_vs_Not_AD	Ast
LY75	Ast	-0.857376	-0.51875	4.77453	0.0308795	High_vs_Not_AD	High_vs_Not_AD	Ast
COBLL1	Ast	-0.660059	3.18176	6.73429	0.0112578	High_vs_Not_AD	High_vs_Not_AD	Ast
GALNT3	Ast	-1.03803	2.99748	7.95076	0.00606469	High_vs_Not_AD	High_vs_Not_AD	Ast
AC009495.3	Ast	-1.21172	0.34837	6.41572	0.0129537	High_vs_Not_AD	High_vs_Not_AD	Ast
SCN1A-AS1	Ast	-0.729982	3.46387	7.51882	0.00753935	High_vs_Not_AD	High_vs_Not_AD	Ast
SCN1A	Ast	-0.629009	4.92219	5.81778	0.0181612	High_vs_Not_AD	High_vs_Not_AD	Ast
XIRP2	Ast	0.889972	0.186911	10.1283	0.00197098	High_vs_Not_AD	High_vs_Not_AD	Ast
AC016723.1	Ast	-0.838636	3.69275	6.25231	0.0144572	High_vs_Not_AD	High_vs_Not_AD	Ast
CERS6	Ast	-0.502826	7.3529	6.18797	0.0149461	High_vs_Not_AD	High_vs_Not_AD	Ast
TTN	Ast	-1.15725	5.95995	12.0889	0.000823819	High_vs_Not_AD	High_vs_Not_AD	Ast
CCDC141	Ast	-1.18335	2.2071	10.8743	0.00145021	High_vs_Not_AD	High_vs_Not_AD	Ast
AC068196.1	Ast	-0.725779	-0.120523	4.90061	0.0290535	High_vs_Not_AD	High_vs_Not_AD	Ast
ITGA4	Ast	1.21459	-0.283794	8.38389	0.00458471	High_vs_Not_AD	High_vs_Not_AD	Ast
NEUROD1	Ast	1.05821	0.270198	6.13029	0.0150318	High_vs_Not_AD	High_vs_Not_AD	Ast
PPP1R1C	Ast	-1.19752	1.77276	7.20588	0.00877996	High_vs_Not_AD	High_vs_Not_AD	Ast
CALCRL	Ast	-0.834966	3.88588	5.69662	0.0193692	High_vs_Not_AD	High_vs_Not_AD	Ast
GULP1	Ast	-0.603244	3.40358	6.16265	0.0151522	High_vs_Not_AD	High_vs_Not_AD	Ast
COL5A2	Ast	-0.607788	4.88215	4.66685	0.0337518	High_vs_Not_AD	High_vs_Not_AD	Ast
STAT4	Ast	-0.534045	2.14	5.23628	0.0247582	High_vs_Not_AD	High_vs_Not_AD	Ast
NABP1	Ast	0.919226	1.99761	9.32181	0.00307294	High_vs_Not_AD	High_vs_Not_AD	Ast
AC114760.2	Ast	-0.851681	2.89484	4.36033	0.0399788	High_vs_Not_AD	High_vs_Not_AD	Ast
ANKRD44-IT1	Ast	0.698834	0.0131422	5.06602	0.0265757	High_vs_Not_AD	High_vs_Not_AD	Ast
AC097717.1	Ast	0.579156	1.57801	4.49667	0.0370499	High_vs_Not_AD	High_vs_Not_AD	Ast
AC007736.1	Ast	-0.803777	0.727451	4.29741	0.0410605	High_vs_Not_AD	High_vs_Not_AD	Ast
EEF1B2	Ast	-0.578764	2.80026	8.0776	0.00569232	High_vs_Not_AD	High_vs_Not_AD	Ast
MYOSLID	Ast	-0.505098	2.82675	4.70907	0.03299	High_vs_Not_AD	High_vs_Not_AD	Ast
AC093865.1	Ast	0.707976	7.74792	8.40935	0.00482033	High_vs_Not_AD	High_vs_Not_AD	Ast
AC108066.2	Ast	0.631581	2.32599	7.1966	0.00888404	High_vs_Not_AD	High_vs_Not_AD	Ast
AC092844.1	Ast	0.817516	4.24974	10.0618	0.00214973	High_vs_Not_AD	High_vs_Not_AD	Ast
STK16	Ast	-0.63223	1.81294	8.22884	0.00526341	High_vs_Not_AD	High_vs_Not_AD	Ast
AC009955.4	Ast	-0.863242	0.375601	5.42189	0.0220299	High_vs_Not_AD	High_vs_Not_AD	Ast
AC009950.1	Ast	-0.875009	2.80883	11.5453	0.0010635	High_vs_Not_AD	High_vs_Not_AD	Ast
AC073476.3	Ast	0.611144	2.09783	5.04443	0.0274823	High_vs_Not_AD	High_vs_Not_AD	Ast
INPP5D	Ast	1.28053	2.84101	12.1989	0.000783878	High_vs_Not_AD	High_vs_Not_AD	Ast
LINC02610	Ast	1.13675	0.796409	9.37576	0.0029331	High_vs_Not_AD	High_vs_Not_AD	Ast
COPS9	Ast	-0.84464	4.88164	12.4644	0.00069222	High_vs_Not_AD	High_vs_Not_AD	Ast
OTOS	Ast	-1.27987	1.05983	11.5076	0.00105443	High_vs_Not_AD	High_vs_Not_AD	Ast
AC005104.3	Ast	-0.689837	0.0827208	6.15096	0.0148232	High_vs_Not_AD	High_vs_Not_AD	Ast
CHL1-AS1	Ast	-0.945636	2.84478	4.83838	0.0307363	High_vs_Not_AD	High_vs_Not_AD	Ast
AC087857.1	Ast	1.13768	2.19782	8.25172	0.00521133	High_vs_Not_AD	High_vs_Not_AD	Ast
AC026167.1	Ast	1.03172	2.30951	5.8126	0.0182086	High_vs_Not_AD	High_vs_Not_AD	Ast
SRGAP3-AS3	Ast	-0.951005	-0.42797	6.2896	0.0135613	High_vs_Not_AD	High_vs_Not_AD	Ast
AC022007.1	Ast	0.545338	0.89422	5.00323	0.0279142	High_vs_Not_AD	High_vs_Not_AD	Ast
AC034193.1	Ast	-0.644838	-0.204253	3.95155	0.0494336	High_vs_Not_AD	High_vs_Not_AD	Ast
IRAK2	Ast	1.2257	4.43437	6.92485	0.010202	High_vs_Not_AD	High_vs_Not_AD	Ast
HRH1	Ast	0.555491	6.82875	6.77304	0.0110293	High_vs_Not_AD	High_vs_Not_AD	Ast
PPARG	Ast	0.504059	2.18278	3.96399	0.0499156	High_vs_Not_AD	High_vs_Not_AD	Ast
RPL32	Ast	-0.952676	5.16475	14.4631	0.000278481	High_vs_Not_AD	High_vs_Not_AD	Ast
GALNT15	Ast	-1.09888	6.42239	6.29388	0.0141413	High_vs_Not_AD	High_vs_Not_AD	Ast
LINC00691	Ast	-0.905501	-0.4463	6.7136	0.01079	High_vs_Not_AD	High_vs_Not_AD	Ast
THRB-IT1	Ast	0.613689	1.73171	7.19481	0.00888073	High_vs_Not_AD	High_vs_Not_AD	Ast
RBMS3-AS1	Ast	-0.945994	0.220042	4.51079	0.0362539	High_vs_Not_AD	High_vs_Not_AD	Ast
GPD1L	Ast	-0.550949	1.9142	6.63215	0.0118453	High_vs_Not_AD	High_vs_Not_AD	Ast
CMTM7	Ast	-0.60955	1.34216	6.28537	0.0141519	High_vs_Not_AD	High_vs_Not_AD	Ast
TRIM71	Ast	0.746189	0.219218	5.22504	0.0244808	High_vs_Not_AD	High_vs_Not_AD	Ast
STAC	Ast	-0.988706	-0.409055	6.84517	0.0101079	High_vs_Not_AD	High_vs_Not_AD	Ast
LIMD1	Ast	0.64105	4.96677	11.583	0.00104346	High_vs_Not_AD	High_vs_Not_AD	Ast
MYL3	Ast	-0.549469	2.73094	7.2352	0.00870809	High_vs_Not_AD	High_vs_Not_AD	Ast
CELSR3	Ast	0.585516	1.86802	4.34324	0.0403439	High_vs_Not_AD	High_vs_Not_AD	Ast
SLC25A20	Ast	0.544113	4.31895	10.6454	0.00162566	High_vs_Not_AD	High_vs_Not_AD	Ast
SLC38A3	Ast	0.739839	3.91673	6.07392	0.0158704	High_vs_Not_AD	High_vs_Not_AD	Ast
U73166.1	Ast	0.53418	1.42716	5.31033	0.0237638	High_vs_Not_AD	High_vs_Not_AD	Ast
LSMEM2	Ast	0.948769	1.23113	8.15169	0.00543743	High_vs_Not_AD	High_vs_Not_AD	Ast
TMEM115	Ast	0.523257	2.25605	5.69424	0.0193988	High_vs_Not_AD	High_vs_Not_AD	Ast
RPL29	Ast	-0.903633	4.08444	14.0231	0.000339749	High_vs_Not_AD	High_vs_Not_AD	Ast
WNT5A	Ast	-0.708231	0.718596	8.45247	0.00462111	High_vs_Not_AD	High_vs_Not_AD	Ast
ADAMTS9	Ast	-0.989046	5.72849	8.71397	0.00414544	High_vs_Not_AD	High_vs_Not_AD	Ast
ADAMTS9-AS1	Ast	-1.44503	1.19184	11.2917	0.00116702	High_vs_Not_AD	High_vs_Not_AD	Ast
ADAMTS9-AS2	Ast	-0.605763	7.65748	4.99284	0.0282493	High_vs_Not_AD	High_vs_Not_AD	Ast
LMOD3	Ast	1.20249	0.403952	11.8743	0.000855915	High_vs_Not_AD	High_vs_Not_AD	Ast
SAMMSON	Ast	0.506496	0.379534	4.4548	0.0375143	High_vs_Not_AD	High_vs_Not_AD	Ast
CNTN3	Ast	-0.566412	4.39842	6.47811	0.0128499	High_vs_Not_AD	High_vs_Not_AD	Ast
CADM2-AS2	Ast	-0.813314	2.08922	4.42031	0.038646	High_vs_Not_AD	High_vs_Not_AD	Ast
PROS1	Ast	-0.55705	5.20461	4.23333	0.0429038	High_vs_Not_AD	High_vs_Not_AD	Ast
STX19	Ast	-0.7049	2.38322	4.15244	0.0448909	High_vs_Not_AD	High_vs_Not_AD	Ast
MTRNR2L12	Ast	3.43827	5.24635	20.977	1.69121634915811e-05	High_vs_Not_AD	High_vs_Not_AD	Ast
COL8A1	Ast	1.31252	1.86972	5.28657	0.0240237	High_vs_Not_AD	High_vs_Not_AD	Ast
RPL24	Ast	-0.994339	4.50901	16.6729	0.00010487	High_vs_Not_AD	High_vs_Not_AD	Ast
LINC01990	Ast	-0.812181	0.628063	9.86691	0.00228525	High_vs_Not_AD	High_vs_Not_AD	Ast
CD200	Ast	-0.656811	3.1268	6.78237	0.010983	High_vs_Not_AD	High_vs_Not_AD	Ast
CFAP44-AS1	Ast	-0.863314	0.910535	4.69822	0.0329628	High_vs_Not_AD	High_vs_Not_AD	Ast
SIDT1	Ast	-1.17351	3.48251	16.9049	9.49630205594647e-05	High_vs_Not_AD	High_vs_Not_AD	Ast
ZBTB20-AS2	Ast	-0.748752	2.93058	3.97883	0.0494979	High_vs_Not_AD	High_vs_Not_AD	Ast
ZBTB20-AS3	Ast	-1.08428	1.47506	9.22139	0.00320021	High_vs_Not_AD	High_vs_Not_AD	Ast
AC068633.1	Ast	0.706853	2.75002	7.52961	0.00749969	High_vs_Not_AD	High_vs_Not_AD	Ast
IGSF11-AS1	Ast	-0.905912	1.02705	4.99119	0.0280799	High_vs_Not_AD	High_vs_Not_AD	Ast
AC126182.3	Ast	-0.678201	0.710075	9.37893	0.00290688	High_vs_Not_AD	High_vs_Not_AD	Ast
ALG1L	Ast	-0.689759	0.00092234	4.00568	0.0480844	High_vs_Not_AD	High_vs_Not_AD	Ast
C3orf22	Ast	-0.924165	0.259763	7.25214	0.00836801	High_vs_Not_AD	High_vs_Not_AD	Ast
AC117480.1	Ast	-0.903682	2.18854	5.57106	0.0206773	High_vs_Not_AD	High_vs_Not_AD	Ast
SEC61A1	Ast	0.558913	4.77032	5.6295	0.0200683	High_vs_Not_AD	High_vs_Not_AD	Ast
AC055733.2	Ast	-1.00978	2.97649	6.61792	0.0119559	High_vs_Not_AD	High_vs_Not_AD	Ast
TMEM108-AS1	Ast	-0.977797	0.561627	7.21077	0.0086042	High_vs_Not_AD	High_vs_Not_AD	Ast
NME9	Ast	0.505851	5.95201	7.13383	0.00916491	High_vs_Not_AD	High_vs_Not_AD	Ast
MRAS	Ast	0.770836	8.09335	7.3807	0.00808146	High_vs_Not_AD	High_vs_Not_AD	Ast
RBP2	Ast	-0.954597	2.81907	4.94334	0.0290198	High_vs_Not_AD	High_vs_Not_AD	Ast
SPSB4	Ast	-1.20474	0.934231	5.47069	0.0215592	High_vs_Not_AD	High_vs_Not_AD	Ast
AC092957.1	Ast	1.05572	-0.112942	8.60136	0.00412982	High_vs_Not_AD	High_vs_Not_AD	Ast
ZIC4	Ast	-1.14113	0.510466	4.8905	0.0294283	High_vs_Not_AD	High_vs_Not_AD	Ast
AADACL2-AS1	Ast	0.8035	0.104657	4.84427	0.0299604	High_vs_Not_AD	High_vs_Not_AD	Ast
AC091607.2	Ast	0.515655	1.14477	4.96009	0.0286809	High_vs_Not_AD	High_vs_Not_AD	Ast
TIPARP-AS1	Ast	-0.699239	0.0208775	5.10472	0.0260434	High_vs_Not_AD	High_vs_Not_AD	Ast
VEPH1	Ast	-0.971633	2.49681	5.13696	0.0261247	High_vs_Not_AD	High_vs_Not_AD	Ast
LXN	Ast	-0.913005	1.17938	6.07985	0.015719	High_vs_Not_AD	High_vs_Not_AD	Ast
IL12A-AS1	Ast	-0.584407	2.1316	8.77759	0.00401273	High_vs_Not_AD	High_vs_Not_AD	Ast
IL12A	Ast	-1.23483	0.568149	8.78472	0.00384105	High_vs_Not_AD	High_vs_Not_AD	Ast
AC079822.1	Ast	-0.856588	0.699608	5.19277	0.0250449	High_vs_Not_AD	High_vs_Not_AD	Ast
TERC	Ast	1.2657	0.0141145	15.3976	0.000158617	High_vs_Not_AD	High_vs_Not_AD	Ast
AC078802.1	Ast	-1.03549	-0.119119	10.7485	0.00141493	High_vs_Not_AD	High_vs_Not_AD	Ast
LRRC31	Ast	-0.856432	-0.618424	6.92952	0.00957433	High_vs_Not_AD	High_vs_Not_AD	Ast
TMEM212-AS1	Ast	0.758657	-0.248643	4.53811	0.0353974	High_vs_Not_AD	High_vs_Not_AD	Ast
NAALADL2-AS2	Ast	-0.836898	0.35168	5.33231	0.023125	High_vs_Not_AD	High_vs_Not_AD	Ast
PEX5L-AS2	Ast	-0.895209	-0.32916	4.33543	0.0396891	High_vs_Not_AD	High_vs_Not_AD	Ast
AC092939.1	Ast	-0.856622	0.845236	7.34727	0.00808866	High_vs_Not_AD	High_vs_Not_AD	Ast
LINC02053	Ast	-1.0278	1.57411	6.01682	0.0162668	High_vs_Not_AD	High_vs_Not_AD	Ast
KLHL6	Ast	1.058	-0.0725466	11.5333	0.000970004	High_vs_Not_AD	High_vs_Not_AD	Ast
ECE2	Ast	0.562376	4.18026	5.3566	0.0232188	High_vs_Not_AD	High_vs_Not_AD	Ast
LINC02069	Ast	-0.735526	1.39133	5.44524	0.0220461	High_vs_Not_AD	High_vs_Not_AD	Ast
ETV5	Ast	0.879568	4.72557	7.34166	0.00824415	High_vs_Not_AD	High_vs_Not_AD	Ast
DGKG	Ast	0.556947	9.41599	8.92186	0.00374165	High_vs_Not_AD	High_vs_Not_AD	Ast
MASP1	Ast	-0.583308	5.15247	5.6917	0.0194155	High_vs_Not_AD	High_vs_Not_AD	Ast
SST	Ast	-1.34799	-0.65521	4.49464	0.0358514	High_vs_Not_AD	High_vs_Not_AD	Ast
UBXN7-AS1	Ast	-0.921663	-0.432417	5.23089	0.0240774	High_vs_Not_AD	High_vs_Not_AD	Ast
RPL35A	Ast	-0.630492	4.43479	11.1945	0.001253	High_vs_Not_AD	High_vs_Not_AD	Ast
ATP5ME	Ast	-0.871872	5.5163	9.07926	0.00346357	High_vs_Not_AD	High_vs_Not_AD	Ast
RNF212	Ast	0.657364	1.90302	5.45478	0.0220332	High_vs_Not_AD	High_vs_Not_AD	Ast
SPON2	Ast	-0.673606	1.09099	5.1281	0.0261045	High_vs_Not_AD	High_vs_Not_AD	Ast
DOK7	Ast	0.927134	0.761653	3.95635	0.0498199	High_vs_Not_AD	High_vs_Not_AD	Ast
JAKMIP1	Ast	-0.513423	1.23806	5.06831	0.0270188	High_vs_Not_AD	High_vs_Not_AD	Ast
WFS1	Ast	0.606347	6.08461	7.38887	0.00804811	High_vs_Not_AD	High_vs_Not_AD	Ast
CLNK	Ast	1.46208	1.67089	15.5077	0.000173258	High_vs_Not_AD	High_vs_Not_AD	Ast
BST1	Ast	-0.815716	0.444449	6.49914	0.012453	High_vs_Not_AD	High_vs_Not_AD	Ast
CD38	Ast	-0.880256	5.6697	8.38079	0.00488945	High_vs_Not_AD	High_vs_Not_AD	Ast
AC093898.1	Ast	0.940756	0.136626	9.17948	0.00312134	High_vs_Not_AD	High_vs_Not_AD	Ast
AC096576.3	Ast	-0.984073	-0.580187	4.60984	0.0338203	High_vs_Not_AD	High_vs_Not_AD	Ast
AC092440.1	Ast	1.86582	0.206088	16.8554	8.2336370649933e-05	High_vs_Not_AD	High_vs_Not_AD	Ast
AC097716.1	Ast	-0.859302	1.46296	5.3866	0.022762	High_vs_Not_AD	High_vs_Not_AD	Ast
RPL9	Ast	-0.501675	4.27462	9.36061	0.00301926	High_vs_Not_AD	High_vs_Not_AD	Ast
AC108471.3	Ast	-0.681093	1.04531	5.47072	0.0216978	High_vs_Not_AD	High_vs_Not_AD	Ast
LIMCH1	Ast	0.51941	8.58624	10.9299	0.0014196	High_vs_Not_AD	High_vs_Not_AD	Ast
AC096586.1	Ast	0.575284	0.299097	4.37525	0.0392225	High_vs_Not_AD	High_vs_Not_AD	Ast
LRRC66	Ast	0.652714	2.41501	7.77945	0.00661212	High_vs_Not_AD	High_vs_Not_AD	Ast
ERVMER34-1	Ast	0.860652	-0.197307	5.869	0.0170971	High_vs_Not_AD	High_vs_Not_AD	Ast
LINC02271	Ast	-0.748847	-0.434306	5.44365	0.021427	High_vs_Not_AD	High_vs_Not_AD	Ast
EPHA5-AS1	Ast	-0.766017	0.846819	6.86606	0.0103562	High_vs_Not_AD	High_vs_Not_AD	Ast
TMPRSS11D	Ast	-1.10962	2.54314	8.80575	0.00396116	High_vs_Not_AD	High_vs_Not_AD	Ast
AC097709.1	Ast	0.582903	1.89715	4.19511	0.0438166	High_vs_Not_AD	High_vs_Not_AD	Ast
CXCL3	Ast	-1.10717	0.695026	6.48741	0.0125347	High_vs_Not_AD	High_vs_Not_AD	Ast
AC073840.1	Ast	0.819446	-0.104706	5.21496	0.0244483	High_vs_Not_AD	High_vs_Not_AD	Ast
AC093895.1	Ast	0.797095	0.505078	4.40816	0.0385671	High_vs_Not_AD	High_vs_Not_AD	Ast
HERC5	Ast	-0.551917	3.29592	6.56808	0.0122686	High_vs_Not_AD	High_vs_Not_AD	Ast
GRID2	Ast	-0.666128	5.45255	10.4163	0.00181306	High_vs_Not_AD	High_vs_Not_AD	Ast
ADH4	Ast	-0.872214	0.735755	4.93686	0.028796	High_vs_Not_AD	High_vs_Not_AD	Ast
ADH6	Ast	-1.17008	0.11638	9.13255	0.00317955	High_vs_Not_AD	High_vs_Not_AD	Ast
BANK1	Ast	0.552393	3.27354	5.82518	0.0180974	High_vs_Not_AD	High_vs_Not_AD	Ast
LINC02428	Ast	0.678897	0.367482	3.99696	0.0485264	High_vs_Not_AD	High_vs_Not_AD	Ast
AC092445.1	Ast	1.60059	2.86815	17.1993	8.36578398553142e-05	High_vs_Not_AD	High_vs_Not_AD	Ast
ENPEP	Ast	-0.975556	0.0603635	8.75237	0.00385898	High_vs_Not_AD	High_vs_Not_AD	Ast
AC023886.1	Ast	-0.937212	2.26105	5.482	0.021693	High_vs_Not_AD	High_vs_Not_AD	Ast
AC093879.1	Ast	-0.921883	6.2336	5.03671	0.0275854	High_vs_Not_AD	High_vs_Not_AD	Ast
SYNPO2	Ast	-0.794892	5.7091	5.29495	0.0239973	High_vs_Not_AD	High_vs_Not_AD	Ast
MYOZ2	Ast	-0.821165	1.6531	5.1451	0.0259679	High_vs_Not_AD	High_vs_Not_AD	Ast
NDNF	Ast	0.893431	0.655481	5.84847	0.0176407	High_vs_Not_AD	High_vs_Not_AD	Ast
LINC02516	Ast	1.27217	0.660979	9.12556	0.00330502	High_vs_Not_AD	High_vs_Not_AD	Ast
ANKRD50	Ast	0.535816	3.58691	8.6495	0.00428192	High_vs_Not_AD	High_vs_Not_AD	Ast
AC104664.1	Ast	1.58425	0.738323	18.6713	4.03627929781301e-05	High_vs_Not_AD	High_vs_Not_AD	Ast
SLC7A11-AS1	Ast	-0.832592	2.92345	4.04654	0.0476524	High_vs_Not_AD	High_vs_Not_AD	Ast
MAML3	Ast	-0.580183	6.20792	6.46551	0.0129322	High_vs_Not_AD	High_vs_Not_AD	Ast
SCOC-AS1	Ast	-0.62938	3.1336	6.23821	0.0145664	High_vs_Not_AD	High_vs_Not_AD	Ast
SMAD1-AS2	Ast	-0.895863	2.33746	5.04923	0.0274073	High_vs_Not_AD	High_vs_Not_AD	Ast
REELD1	Ast	-0.910954	-0.00553901	5.65411	0.0192321	High_vs_Not_AD	High_vs_Not_AD	Ast
AC097450.1	Ast	-0.812479	2.01641	4.41803	0.0386837	High_vs_Not_AD	High_vs_Not_AD	Ast
EDNRA	Ast	-0.805702	1.92497	7.13215	0.00915693	High_vs_Not_AD	High_vs_Not_AD	Ast
ARHGAP10	Ast	-0.841204	4.03	5.93762	0.0170504	High_vs_Not_AD	High_vs_Not_AD	Ast
AC069272.1	Ast	-0.661177	2.50799	4.25803	0.0423184	High_vs_Not_AD	High_vs_Not_AD	Ast
RPS3A	Ast	-0.62693	4.17537	11.1628	0.00127207	High_vs_Not_AD	High_vs_Not_AD	Ast
TMEM154	Ast	0.969066	0.289536	9.3618	0.0028868	High_vs_Not_AD	High_vs_Not_AD	Ast
TLR2	Ast	-1.29981	1.67716	9.0119	0.00356432	High_vs_Not_AD	High_vs_Not_AD	Ast
SFRP2	Ast	-1.22045	1.82468	6.61931	0.0119103	High_vs_Not_AD	High_vs_Not_AD	Ast
AC079298.3	Ast	-1.11549	4.37947	8.65597	0.00426729	High_vs_Not_AD	High_vs_Not_AD	Ast
DCHS2	Ast	-0.628696	6.81029	7.45272	0.00779137	High_vs_Not_AD	High_vs_Not_AD	Ast
AC097467.3	Ast	-0.762844	1.63292	4.52643	0.03638	High_vs_Not_AD	High_vs_Not_AD	Ast
GUCY1A1	Ast	-1.02481	4.74066	8.1953	0.00536338	High_vs_Not_AD	High_vs_Not_AD	Ast
AC098679.5	Ast	0.741879	1.79583	6.34857	0.0137446	High_vs_Not_AD	High_vs_Not_AD	Ast
FSTL5	Ast	0.971151	5.6131	4.80593	0.0312759	High_vs_Not_AD	High_vs_Not_AD	Ast
AC097537.1	Ast	-1.05964	4.74872	6.38609	0.0134793	High_vs_Not_AD	High_vs_Not_AD	Ast
TENM3-AS1	Ast	-0.639832	0.674036	6.79219	0.0107454	High_vs_Not_AD	High_vs_Not_AD	Ast
AC079226.2	Ast	-1.33084	-0.418251	10.5641	0.00150744	High_vs_Not_AD	High_vs_Not_AD	Ast
LINC02427	Ast	-0.624662	5.18549	4.28964	0.041578	High_vs_Not_AD	High_vs_Not_AD	Ast
LINC01060	Ast	-0.880374	0.63045	16.7914	9.159779235021e-05	High_vs_Not_AD	High_vs_Not_AD	Ast
AC106799.2	Ast	0.833548	-0.143067	7.24137	0.00827795	High_vs_Not_AD	High_vs_Not_AD	Ast
AC091912.3	Ast	-0.550042	3.62962	4.09232	0.0464358	High_vs_Not_AD	High_vs_Not_AD	Ast
SEMA5A	Ast	-0.590139	4.06317	4.07024	0.0470122	High_vs_Not_AD	High_vs_Not_AD	Ast
SNHG18	Ast	-0.687784	1.10979	5.08768	0.0267136	High_vs_Not_AD	High_vs_Not_AD	Ast
CMBL	Ast	0.519958	4.03113	8.0443	0.00578455	High_vs_Not_AD	High_vs_Not_AD	Ast
AC010491.1	Ast	-0.564246	1.56491	7.26025	0.00856705	High_vs_Not_AD	High_vs_Not_AD	Ast
AC010638.1	Ast	-0.847278	2.10876	4.35938	0.0399755	High_vs_Not_AD	High_vs_Not_AD	Ast
AC091885.2	Ast	-0.961693	4.05396	6.03485	0.0162003	High_vs_Not_AD	High_vs_Not_AD	Ast
PURPL	Ast	1.16038	-0.0503913	5.3148	0.0231328	High_vs_Not_AD	High_vs_Not_AD	Ast
AC109472.1	Ast	2.23272	1.10564	17.9222	5.66352813354005e-05	High_vs_Not_AD	High_vs_Not_AD	Ast
AC025178.1	Ast	0.934359	2.57503	9.98429	0.00223524	High_vs_Not_AD	High_vs_Not_AD	Ast
AC034223.1	Ast	-0.843985	0.142432	5.40036	0.0222044	High_vs_Not_AD	High_vs_Not_AD	Ast
AC137810.1	Ast	-0.744739	1.70949	4.02413	0.0481737	High_vs_Not_AD	High_vs_Not_AD	Ast
RANBP3L	Ast	0.802283	9.53132	7.2243	0.00875111	High_vs_Not_AD	High_vs_Not_AD	Ast
AC008957.2	Ast	-1.05972	7.3503	4.43656	0.0383194	High_vs_Not_AD	High_vs_Not_AD	Ast
AC008957.1	Ast	-0.89553	5.03174	4.57456	0.0355088	High_vs_Not_AD	High_vs_Not_AD	Ast
AC008945.2	Ast	0.822911	1.98922	9.24592	0.00319412	High_vs_Not_AD	High_vs_Not_AD	Ast
AC008875.3	Ast	-0.622943	0.493437	4.88801	0.0295758	High_vs_Not_AD	High_vs_Not_AD	Ast
AC093297.1	Ast	-0.947896	0.440795	4.44261	0.0377061	High_vs_Not_AD	High_vs_Not_AD	Ast
LINC01033	Ast	0.886176	0.539077	7.50678	0.00743119	High_vs_Not_AD	High_vs_Not_AD	Ast
AC092343.1	Ast	-0.785989	1.62747	5.02287	0.0277241	High_vs_Not_AD	High_vs_Not_AD	Ast
ELOVL7	Ast	-0.738648	2.43165	8.62589	0.00432808	High_vs_Not_AD	High_vs_Not_AD	Ast
AC025442.2	Ast	0.910569	3.52414	5.90359	0.0173619	High_vs_Not_AD	High_vs_Not_AD	Ast
MAST4-IT1	Ast	-0.567494	1.68333	6.30252	0.0140587	High_vs_Not_AD	High_vs_Not_AD	Ast
CD180	Ast	1.17069	-0.180978	4.48949	0.0363574	High_vs_Not_AD	High_vs_Not_AD	Ast
CARTPT	Ast	-1.26647	-0.643911	6.16573	0.0143565	High_vs_Not_AD	High_vs_Not_AD	Ast
AC008771.1	Ast	-0.722549	5.84012	5.55491	0.0208805	High_vs_Not_AD	High_vs_Not_AD	Ast
AC010623.1	Ast	0.713324	1.78385	5.89459	0.0174292	High_vs_Not_AD	High_vs_Not_AD	Ast
RPS23	Ast	-0.768189	4.37954	10.3371	0.00188359	High_vs_Not_AD	High_vs_Not_AD	Ast
LINC01338	Ast	0.722066	4.27699	4.05034	0.0475389	High_vs_Not_AD	High_vs_Not_AD	Ast
VCAN	Ast	-0.587402	7.65485	5.38215	0.0228999	High_vs_Not_AD	High_vs_Not_AD	Ast
VCAN-AS1	Ast	-1.00934	2.93904	4.77816	0.031763	High_vs_Not_AD	High_vs_Not_AD	Ast
COX7C	Ast	-0.689677	5.05669	10.4072	0.00182102	High_vs_Not_AD	High_vs_Not_AD	Ast
LINC01949	Ast	-0.719983	1.35979	5.52967	0.0210879	High_vs_Not_AD	High_vs_Not_AD	Ast
AC117528.1	Ast	-0.62113	3.60557	5.46736	0.021886	High_vs_Not_AD	High_vs_Not_AD	Ast
AC008592.2	Ast	-0.977787	0.199124	4.65059	0.0335154	High_vs_Not_AD	High_vs_Not_AD	Ast
RGMB	Ast	0.572749	4.11672	7.09801	0.00933626	High_vs_Not_AD	High_vs_Not_AD	Ast
SLCO4C1	Ast	-0.607068	-0.284376	4.00105	0.0480083	High_vs_Not_AD	High_vs_Not_AD	Ast
AC010275.1	Ast	-0.948153	0.611751	7.04576	0.00937862	High_vs_Not_AD	High_vs_Not_AD	Ast
LINC02200	Ast	0.862782	0.922839	6.98438	0.00977846	High_vs_Not_AD	High_vs_Not_AD	Ast
AC093240.1	Ast	0.853276	2.1582	4.53473	0.0363012	High_vs_Not_AD	High_vs_Not_AD	Ast
LINC02208	Ast	1.06846	3.64982	5.51241	0.0213642	High_vs_Not_AD	High_vs_Not_AD	Ast
PRR16	Ast	-1.13645	4.39279	12.3896	0.000716891	High_vs_Not_AD	High_vs_Not_AD	Ast
AC022101.1	Ast	-0.987487	2.46223	6.54459	0.0124023	High_vs_Not_AD	High_vs_Not_AD	Ast
LINC02201	Ast	-0.561122	0.059378	4.32254	0.0402411	High_vs_Not_AD	High_vs_Not_AD	Ast
AC093535.1	Ast	-0.94497	6.77819	5.96423	0.0168093	High_vs_Not_AD	High_vs_Not_AD	Ast
FBN2	Ast	-1.01971	0.913023	11.0026	0.00133548	High_vs_Not_AD	High_vs_Not_AD	Ast
AC008591.1	Ast	-0.812888	1.77019	8.35859	0.00492257	High_vs_Not_AD	High_vs_Not_AD	Ast
HINT1	Ast	-0.553594	3.92462	7.01095	0.00976264	High_vs_Not_AD	High_vs_Not_AD	Ast
SOWAHA	Ast	0.913149	1.74683	9.06865	0.00347801	High_vs_Not_AD	High_vs_Not_AD	Ast
UQCRQ	Ast	-0.753724	3.69653	8.76769	0.00403922	High_vs_Not_AD	High_vs_Not_AD	Ast
AC109439.2	Ast	-1.27658	0.226977	5.21998	0.0244	High_vs_Not_AD	High_vs_Not_AD	Ast
AC011405.1	Ast	-0.770101	2.15917	6.59985	0.0120584	High_vs_Not_AD	High_vs_Not_AD	Ast
AC011379.1	Ast	0.636416	3.00907	4.93579	0.0291496	High_vs_Not_AD	High_vs_Not_AD	Ast
NDUFA2	Ast	-0.521117	3.3561	9.7519	0.00249825	High_vs_Not_AD	High_vs_Not_AD	Ast
PCDHA11	Ast	0.592695	0.149781	4.32476	0.040247	High_vs_Not_AD	High_vs_Not_AD	Ast
PCDHB7	Ast	0.587444	2.30258	5.26201	0.0244317	High_vs_Not_AD	High_vs_Not_AD	Ast
PCDHGA1	Ast	0.504516	3.32507	4.74173	0.032402	High_vs_Not_AD	High_vs_Not_AD	Ast
AC005753.2	Ast	-1.24439	2.92223	4.47207	0.0375836	High_vs_Not_AD	High_vs_Not_AD	Ast
SPRY4	Ast	1.01796	3.673	6.9836	0.00990096	High_vs_Not_AD	High_vs_Not_AD	Ast
SPRY4-AS1	Ast	0.677903	6.77872	6.81226	0.0108086	High_vs_Not_AD	High_vs_Not_AD	Ast
ARHGAP26-IT1	Ast	0.751312	0.578638	6.68111	0.0113994	High_vs_Not_AD	High_vs_Not_AD	Ast
AC008696.2	Ast	-0.621011	1.37276	5.3492	0.0232312	High_vs_Not_AD	High_vs_Not_AD	Ast
AC011370.1	Ast	-0.921195	0.458016	5.75499	0.0184663	High_vs_Not_AD	High_vs_Not_AD	Ast
SPINK13	Ast	-0.738976	1.30681	4.2571	0.0422085	High_vs_Not_AD	High_vs_Not_AD	Ast
SPINK9	Ast	-0.706513	0.606088	5.30494	0.0235808	High_vs_Not_AD	High_vs_Not_AD	Ast
AC114939.1	Ast	-0.87766	-0.00985016	5.27485	0.023718	High_vs_Not_AD	High_vs_Not_AD	Ast
AC116312.1	Ast	-0.568494	0.00293236	3.98546	0.0485921	High_vs_Not_AD	High_vs_Not_AD	Ast
SH3TC2-DT	Ast	0.973628	0.172859	5.12756	0.0257564	High_vs_Not_AD	High_vs_Not_AD	Ast
ABLIM3	Ast	0.912758	4.81816	10.247	0.00196633	High_vs_Not_AD	High_vs_Not_AD	Ast
CD74	Ast	0.82097	1.57989	3.9751	0.0494983	High_vs_Not_AD	High_vs_Not_AD	Ast
RPS14	Ast	-0.73025	4.57791	11.9657	0.00087271	High_vs_Not_AD	High_vs_Not_AD	Ast
AC008676.1	Ast	-0.810938	1.30286	6.35256	0.0136212	High_vs_Not_AD	High_vs_Not_AD	Ast
INSYN2B	Ast	-1.28621	2.52568	15.9761	0.000141903	High_vs_Not_AD	High_vs_Not_AD	Ast
AC011407.1	Ast	0.67566	-0.0154126	5.75629	0.0182796	High_vs_Not_AD	High_vs_Not_AD	Ast
AC113346.2	Ast	-1.43349	0.0253032	16.3141	0.000104906	High_vs_Not_AD	High_vs_Not_AD	Ast
PRELID1	Ast	-0.526611	1.97165	4.90047	0.029697	High_vs_Not_AD	High_vs_Not_AD	Ast
COL23A1	Ast	0.670603	6.06353	7.86494	0.00632744	High_vs_Not_AD	High_vs_Not_AD	Ast
AC008443.5	Ast	-0.568382	2.12786	6.93088	0.010171	High_vs_Not_AD	High_vs_Not_AD	Ast
AL357054.5	Ast	-0.817132	1.00614	5.21535	0.0248617	High_vs_Not_AD	High_vs_Not_AD	Ast
SLC22A23	Ast	0.504252	6.85963	9.09764	0.00343236	High_vs_Not_AD	High_vs_Not_AD	Ast
AL590004.3	Ast	1.23752	-0.147718	5.04027	0.0267707	High_vs_Not_AD	High_vs_Not_AD	Ast
PPP1R3G	Ast	0.678794	1.56058	4.81574	0.0310961	High_vs_Not_AD	High_vs_Not_AD	Ast
AL022097.1	Ast	-0.777415	1.90589	3.98369	0.0493139	High_vs_Not_AD	High_vs_Not_AD	Ast
CAGE1	Ast	-0.620709	0.777757	6.51518	0.0124482	High_vs_Not_AD	High_vs_Not_AD	Ast
C6orf52	Ast	-0.531618	1.55356	6.33379	0.0138167	High_vs_Not_AD	High_vs_Not_AD	Ast
MIR548A1HG	Ast	0.743031	0.605539	4.83777	0.0304429	High_vs_Not_AD	High_vs_Not_AD	Ast
AL035401.1	Ast	0.840895	0.831893	7.59029	0.00717529	High_vs_Not_AD	High_vs_Not_AD	Ast
AL031775.1	Ast	0.632176	0.293715	6.67313	0.0113605	High_vs_Not_AD	High_vs_Not_AD	Ast
BTN3A3	Ast	-0.5838	1.50927	5.71963	0.0190806	High_vs_Not_AD	High_vs_Not_AD	Ast
ZBED9	Ast	-0.749529	0.40186	8.58309	0.00427756	High_vs_Not_AD	High_vs_Not_AD	Ast
ZNF311	Ast	-0.899365	1.21617	12.9975	0.000528625	High_vs_Not_AD	High_vs_Not_AD	Ast
OR2H2	Ast	-0.940207	1.4842	4.05171	0.047403	High_vs_Not_AD	High_vs_Not_AD	Ast
GTF2H4	Ast	-0.506451	2.32161	4.7603	0.0320689	High_vs_Not_AD	High_vs_Not_AD	Ast
POU5F1	Ast	0.891576	0.491708	9.83203	0.00231437	High_vs_Not_AD	High_vs_Not_AD	Ast
AL662884.5	Ast	-0.823922	1.3716	4.26052	0.0421501	High_vs_Not_AD	High_vs_Not_AD	Ast
AL645940.1	Ast	-0.514819	-0.0589398	4.3922	0.0386044	High_vs_Not_AD	High_vs_Not_AD	Ast
RPS18	Ast	-0.963781	4.1741	12.3511	0.000729834	High_vs_Not_AD	High_vs_Not_AD	Ast
AL451165.2	Ast	-0.591363	1.8436	5.06628	0.0271358	High_vs_Not_AD	High_vs_Not_AD	Ast
RPL10A	Ast	-0.606547	3.67631	6.0976	0.0156763	High_vs_Not_AD	High_vs_Not_AD	Ast
AL157823.2	Ast	-0.855816	-0.0463322	6.44497	0.0126471	High_vs_Not_AD	High_vs_Not_AD	Ast
CCND3	Ast	0.83395	7.29413	8.41714	0.00480173	High_vs_Not_AD	High_vs_Not_AD	Ast
PKHD1	Ast	1.30419	0.54059	17.9722	5.44083848337592e-05	High_vs_Not_AD	High_vs_Not_AD	Ast
PAQR8	Ast	0.651173	5.3896	8.83557	0.00390416	High_vs_Not_AD	High_vs_Not_AD	Ast
HCRTR2	Ast	0.658981	0.743706	5.0827	0.026702	High_vs_Not_AD	High_vs_Not_AD	Ast
LINC02549	Ast	-0.894828	-0.216446	5.55329	0.0202493	High_vs_Not_AD	High_vs_Not_AD	Ast
B3GAT2	Ast	-0.918466	5.45743	12.1696	0.000793501	High_vs_Not_AD	High_vs_Not_AD	Ast
AL589935.3	Ast	-0.91075	1.94062	5.53826	0.0210377	High_vs_Not_AD	High_vs_Not_AD	Ast
AL355612.1	Ast	-1.16932	3.71053	8.36703	0.004926	High_vs_Not_AD	High_vs_Not_AD	Ast
AL451064.1	Ast	0.566066	0.926905	6.10808	0.0154814	High_vs_Not_AD	High_vs_Not_AD	Ast
TPBG	Ast	-1.27514	0.319982	14.3912	0.00026137	High_vs_Not_AD	High_vs_Not_AD	Ast
AL353135.2	Ast	-0.646198	2.18795	8.24381	0.00523651	High_vs_Not_AD	High_vs_Not_AD	Ast
RRAGD	Ast	-0.584149	3.47507	10.002	0.00221385	High_vs_Not_AD	High_vs_Not_AD	Ast
PRDM1	Ast	-0.925207	0.844678	8.38343	0.00479152	High_vs_Not_AD	High_vs_Not_AD	Ast
CRYBG1	Ast	-0.507751	1.55953	4.12909	0.045422	High_vs_Not_AD	High_vs_Not_AD	Ast
ARMC2-AS1	Ast	-0.820336	-0.259462	4.95084	0.0281835	High_vs_Not_AD	High_vs_Not_AD	Ast
AL050350.1	Ast	-0.976891	1.06534	4.90038	0.029492	High_vs_Not_AD	High_vs_Not_AD	Ast
SLC22A16	Ast	1.96344	-0.139899	13.968	0.000299043	High_vs_Not_AD	High_vs_Not_AD	Ast
MARCKS	Ast	0.737275	5.30858	12.1796	0.000789808	High_vs_Not_AD	High_vs_Not_AD	Ast
AL357141.1	Ast	-0.729855	0.279098	4.24023	0.0421924	High_vs_Not_AD	High_vs_Not_AD	Ast
COL10A1	Ast	-0.879005	2.79084	5.7782	0.0185485	High_vs_Not_AD	High_vs_Not_AD	Ast
RSPH4A	Ast	-0.662911	0.442844	4.07828	0.046364	High_vs_Not_AD	High_vs_Not_AD	Ast
ROS1	Ast	-0.647616	0.945832	4.55383	0.0357203	High_vs_Not_AD	High_vs_Not_AD	Ast
DCBLD1	Ast	-0.522056	3.35502	15.4506	0.000179654	High_vs_Not_AD	High_vs_Not_AD	Ast
AL137009.1	Ast	-0.818083	5.97232	5.53036	0.0211556	High_vs_Not_AD	High_vs_Not_AD	Ast
GJA1	Ast	0.513771	8.65309	5.45913	0.0219755	High_vs_Not_AD	High_vs_Not_AD	Ast
ARHGAP18	Ast	-0.775456	2.7662	11.9287	0.000888863	High_vs_Not_AD	High_vs_Not_AD	Ast
RPS12	Ast	-0.959111	4.6686	17.8762	6.23393028375326e-05	High_vs_Not_AD	High_vs_Not_AD	Ast
AL360178.1	Ast	-0.903794	4.37319	5.00946	0.027999	High_vs_Not_AD	High_vs_Not_AD	Ast
AL360178.2	Ast	-1.0181	1.63213	6.57115	0.0121911	High_vs_Not_AD	High_vs_Not_AD	Ast
MTFR2	Ast	-1.0468	-0.00317654	9.76878	0.00232118	High_vs_Not_AD	High_vs_Not_AD	Ast
AL023581.1	Ast	-1.1055	-0.106418	9.76994	0.0022976	High_vs_Not_AD	High_vs_Not_AD	Ast
PLAGL1	Ast	-0.919058	4.83511	11.9523	0.000878078	High_vs_Not_AD	High_vs_Not_AD	Ast
HYMAI	Ast	-1.1874	1.47449	14.7137	0.00024546	High_vs_Not_AD	High_vs_Not_AD	Ast
AL357992.1	Ast	-0.97224	0.026994	8.12734	0.00528681	High_vs_Not_AD	High_vs_Not_AD	Ast
AL450344.3	Ast	0.950195	-0.101615	9.76543	0.00230671	High_vs_Not_AD	High_vs_Not_AD	Ast
SYNE1	Ast	0.516878	9.50804	6.01714	0.0163477	High_vs_Not_AD	High_vs_Not_AD	Ast
CLDN20	Ast	-0.724009	1.4564	5.66361	0.0196398	High_vs_Not_AD	High_vs_Not_AD	Ast
AL355297.3	Ast	0.505662	0.509775	4.23058	0.0426414	High_vs_Not_AD	High_vs_Not_AD	Ast
AL035634.1	Ast	-0.797804	0.564746	4.65009	0.0336898	High_vs_Not_AD	High_vs_Not_AD	Ast
SYTL3	Ast	1.02736	2.78935	12.8837	0.000571517	High_vs_Not_AD	High_vs_Not_AD	Ast
PACRG-AS3	Ast	-0.766791	1.08088	6.66564	0.0115538	High_vs_Not_AD	High_vs_Not_AD	Ast
C6orf118	Ast	0.906457	2.8272	5.7608	0.0187276	High_vs_Not_AD	High_vs_Not_AD	Ast
CCR6	Ast	-0.67286	0.7817	4.90365	0.0294185	High_vs_Not_AD	High_vs_Not_AD	Ast
BX322234.1	Ast	0.608345	3.31119	12.0697	0.000832328	High_vs_Not_AD	High_vs_Not_AD	Ast
AL031259.1	Ast	0.760352	-0.123124	4.34163	0.0396476	High_vs_Not_AD	High_vs_Not_AD	Ast
AC093627.4	Ast	1.00822	-0.124439	9.82277	0.00223741	High_vs_Not_AD	High_vs_Not_AD	Ast
AC073957.1	Ast	-0.867018	1.01721	11.2119	0.00121255	High_vs_Not_AD	High_vs_Not_AD	Ast
GPER1	Ast	0.957703	1.85277	6.0565	0.0160124	High_vs_Not_AD	High_vs_Not_AD	Ast
NUDT1	Ast	-1.18473	-0.0764633	18.367	4.10356909254613e-05	High_vs_Not_AD	High_vs_Not_AD	Ast
CHST12	Ast	0.555176	5.34917	7.7652	0.00665324	High_vs_Not_AD	High_vs_Not_AD	Ast
AC079804.3	Ast	1.0229	-0.153189	13.1229	0.000448562	High_vs_Not_AD	High_vs_Not_AD	Ast
AC060834.2	Ast	1.20423	0.174712	10.5137	0.00162214	High_vs_Not_AD	High_vs_Not_AD	Ast
SCIN	Ast	1.03837	-0.318615	6.44805	0.0124658	High_vs_Not_AD	High_vs_Not_AD	Ast
TSPAN13	Ast	-0.525852	2.41892	7.58937	0.00727244	High_vs_Not_AD	High_vs_Not_AD	Ast
STEAP1B	Ast	1.00321	2.96231	12.6554	0.00063492	High_vs_Not_AD	High_vs_Not_AD	Ast
TOMM7	Ast	-0.742306	4.19226	14.5142	0.000272327	High_vs_Not_AD	High_vs_Not_AD	Ast
AC004540.2	Ast	0.690291	2.45892	6.49527	0.0127421	High_vs_Not_AD	High_vs_Not_AD	Ast
SKAP2	Ast	-0.523384	4.34343	5.45835	0.0219872	High_vs_Not_AD	High_vs_Not_AD	Ast
AC007130.1	Ast	-0.913133	1.76945	4.35549	0.04002	High_vs_Not_AD	High_vs_Not_AD	Ast
CREB5	Ast	1.61172	5.19858	29.5441	5.78816972958682e-07	High_vs_Not_AD	High_vs_Not_AD	Ast
TRIL	Ast	0.504304	5.05481	4.93312	0.0291817	High_vs_Not_AD	High_vs_Not_AD	Ast
AQP1	Ast	-0.930836	5.65904	6.35445	0.0137018	High_vs_Not_AD	High_vs_Not_AD	Ast
PDE1C	Ast	-0.783359	4.87804	6.48565	0.0127985	High_vs_Not_AD	High_vs_Not_AD	Ast
AC083864.5	Ast	-1.36718	3.90293	9.59935	0.0026892	High_vs_Not_AD	High_vs_Not_AD	Ast
AC004988.1	Ast	-0.68874	0.325497	4.18587	0.0435735	High_vs_Not_AD	High_vs_Not_AD	Ast
PGAM2	Ast	-1.55432	1.88627	11.1386	0.00127819	High_vs_Not_AD	High_vs_Not_AD	Ast
NACAD	Ast	0.615727	2.19984	10.3805	0.00184691	High_vs_Not_AD	High_vs_Not_AD	Ast
COBL	Ast	0.582236	7.28419	9.51808	0.00279557	High_vs_Not_AD	High_vs_Not_AD	Ast
AC006459.1	Ast	2.16775	-0.701787	12.233	0.000632266	High_vs_Not_AD	High_vs_Not_AD	Ast
EGFR-AS1	Ast	-0.668174	0.276561	3.97759	0.0490078	High_vs_Not_AD	High_vs_Not_AD	Ast
AC027644.3	Ast	-0.561813	2.74193	5.35508	0.0232448	High_vs_Not_AD	High_vs_Not_AD	Ast
AC092100.1	Ast	0.577262	0.828407	5.87957	0.0174288	High_vs_Not_AD	High_vs_Not_AD	Ast
FZD9	Ast	1.58473	1.45696	7.7294	0.00673267	High_vs_Not_AD	High_vs_Not_AD	Ast
CLIP2	Ast	0.676618	6.68439	4.00975	0.0486342	High_vs_Not_AD	High_vs_Not_AD	Ast
CASTOR2	Ast	0.518097	5.66797	4.57382	0.0355222	High_vs_Not_AD	High_vs_Not_AD	Ast
TRIM73	Ast	-0.616266	3.30134	11.9629	0.000874798	High_vs_Not_AD	High_vs_Not_AD	Ast
RHBDD2	Ast	0.564817	4.22522	10.3894	0.00183697	High_vs_Not_AD	High_vs_Not_AD	Ast
AC006972.1	Ast	1.92806	2.08206	18.5661	4.61891810463303e-05	High_vs_Not_AD	High_vs_Not_AD	Ast
PCLO	Ast	-0.540091	7.0805	8.39496	0.00485495	High_vs_Not_AD	High_vs_Not_AD	Ast
SEMA3E	Ast	0.823116	2.97495	6.91939	0.010236	High_vs_Not_AD	High_vs_Not_AD	Ast
AC005009.2	Ast	-0.925869	4.03335	8.49022	0.00463275	High_vs_Not_AD	High_vs_Not_AD	Ast
AC002456.1	Ast	0.512955	0.60232	4.47768	0.0371883	High_vs_Not_AD	High_vs_Not_AD	Ast
TAC1	Ast	-0.919559	-0.483475	4.35485	0.0390935	High_vs_Not_AD	High_vs_Not_AD	Ast
ATP5MF	Ast	-0.628964	3.92848	9.34079	0.00304912	High_vs_Not_AD	High_vs_Not_AD	Ast
AC004522.3	Ast	-0.773463	1.70188	5.18085	0.0254705	High_vs_Not_AD	High_vs_Not_AD	Ast
TFR2	Ast	-0.513354	1.29606	4.90733	0.0295229	High_vs_Not_AD	High_vs_Not_AD	Ast
ACHE	Ast	-0.552192	1.42886	4.39796	0.0390709	High_vs_Not_AD	High_vs_Not_AD	Ast
SERPINE1	Ast	1.82693	-0.141676	5.93301	0.016471	High_vs_Not_AD	High_vs_Not_AD	Ast
POLR2J	Ast	-0.699184	3.49517	9.00962	0.00358652	High_vs_Not_AD	High_vs_Not_AD	Ast
SPDYE2	Ast	-1.07869	3.58739	6.15879	0.0151828	High_vs_Not_AD	High_vs_Not_AD	Ast
AC005064.1	Ast	1.07	1.12296	7.17798	0.00888958	High_vs_Not_AD	High_vs_Not_AD	Ast
AC002467.1	Ast	-0.707611	0.150954	8.29926	0.00488554	High_vs_Not_AD	High_vs_Not_AD	Ast
SLC26A3	Ast	1.56902	2.22731	15.6717	0.000162116	High_vs_Not_AD	High_vs_Not_AD	Ast
AC002066.1	Ast	0.945233	1.22878	6.75103	0.0110941	High_vs_Not_AD	High_vs_Not_AD	Ast
ANKRD7	Ast	-0.523521	3.84069	8.16937	0.00543473	High_vs_Not_AD	High_vs_Not_AD	Ast
AC004946.1	Ast	-1.19164	-0.0169118	6.6898	0.0111241	High_vs_Not_AD	High_vs_Not_AD	Ast
ATP6V1F	Ast	-0.514702	2.64968	4.74167	0.0324058	High_vs_Not_AD	High_vs_Not_AD	Ast
AC087071.2	Ast	-0.771612	2.16833	4.68913	0.0333192	High_vs_Not_AD	High_vs_Not_AD	Ast
TSGA13	Ast	-0.852615	-0.294928	10.6061	0.00150558	High_vs_Not_AD	High_vs_Not_AD	Ast
AC009542.1	Ast	-0.733861	1.37112	3.98827	0.0491124	High_vs_Not_AD	High_vs_Not_AD	Ast
AC078842.2	Ast	-1.13153	2.86178	7.98418	0.00596115	High_vs_Not_AD	High_vs_Not_AD	Ast
KEL	Ast	-0.966266	0.31615	13.7317	0.000354744	High_vs_Not_AD	High_vs_Not_AD	Ast
AC073342.1	Ast	-0.571763	3.22758	4.67397	0.0336298	High_vs_Not_AD	High_vs_Not_AD	Ast
AC092666.1	Ast	-0.829918	1.09414	4.92757	0.0290732	High_vs_Not_AD	High_vs_Not_AD	Ast
KCNH2	Ast	0.797833	2.0903	7.90092	0.00621802	High_vs_Not_AD	High_vs_Not_AD	Ast
PRAG1	Ast	-0.523775	5.05705	4.66635	0.0337607	High_vs_Not_AD	High_vs_Not_AD	Ast
AC103957.1	Ast	1.5787	-0.508172	12.1706	0.000676532	High_vs_Not_AD	High_vs_Not_AD	Ast
AC087269.1	Ast	0.726196	0.651682	4.77248	0.0316107	High_vs_Not_AD	High_vs_Not_AD	Ast
AC105001.1	Ast	-0.745808	0.258872	4.59973	0.0345331	High_vs_Not_AD	High_vs_Not_AD	Ast
AF131216.3	Ast	-0.875633	-0.143576	6.8168	0.0103251	High_vs_Not_AD	High_vs_Not_AD	Ast
AC106845.1	Ast	0.669905	8.15097	5.57314	0.0206783	High_vs_Not_AD	High_vs_Not_AD	Ast
MSR1	Ast	0.653017	1.08913	5.03639	0.0274875	High_vs_Not_AD	High_vs_Not_AD	Ast
HR	Ast	0.822764	0.553876	6.23691	0.0143332	High_vs_Not_AD	High_vs_Not_AD	Ast
PIWIL2	Ast	-0.531637	2.81098	5.49032	0.0216231	High_vs_Not_AD	High_vs_Not_AD	Ast
TNFRSF10C	Ast	1.11784	0.490705	5.85988	0.0174883	High_vs_Not_AD	High_vs_Not_AD	Ast
AC025871.1	Ast	-0.960133	-0.304274	6.10921	0.0149707	High_vs_Not_AD	High_vs_Not_AD	Ast
AC108449.2	Ast	0.610746	0.98571	4.01421	0.0483739	High_vs_Not_AD	High_vs_Not_AD	Ast
DUSP4	Ast	1.79537	-0.508337	12.5505	0.000563724	High_vs_Not_AD	High_vs_Not_AD	Ast
AC026979.4	Ast	0.66295	1.53694	4.7412	0.0323836	High_vs_Not_AD	High_vs_Not_AD	Ast
PURG	Ast	0.652581	6.97583	11.589	0.00104039	High_vs_Not_AD	High_vs_Not_AD	Ast
AC124290.1	Ast	0.548136	1.30759	4.71325	0.0328226	High_vs_Not_AD	High_vs_Not_AD	Ast
ZNF703	Ast	0.93504	3.26114	12.1249	0.000811274	High_vs_Not_AD	High_vs_Not_AD	Ast
AC087623.2	Ast	-0.619969	0.335104	4.11513	0.045351	High_vs_Not_AD	High_vs_Not_AD	Ast
HTRA4	Ast	0.74731	-0.0865551	6.55861	0.0119	High_vs_Not_AD	High_vs_Not_AD	Ast
ADAM18	Ast	1.11501	0.0376441	8.41509	0.00457685	High_vs_Not_AD	High_vs_Not_AD	Ast
SFRP1	Ast	0.664734	-0.161898	4.27411	0.0411711	High_vs_Not_AD	High_vs_Not_AD	Ast
AC103769.1	Ast	0.633191	0.291496	6.09119	0.0154109	High_vs_Not_AD	High_vs_Not_AD	Ast
AC027698.1	Ast	-0.836678	1.95631	5.23847	0.0247115	High_vs_Not_AD	High_vs_Not_AD	Ast
AC090577.1	Ast	-0.885775	2.13438	4.49078	0.0371644	High_vs_Not_AD	High_vs_Not_AD	Ast
RPL7	Ast	-0.729657	4.00479	10.0499	0.00216255	High_vs_Not_AD	High_vs_Not_AD	Ast
AC027018.1	Ast	-0.80407	4.62949	4.05184	0.0474986	High_vs_Not_AD	High_vs_Not_AD	Ast
AC068700.1	Ast	0.819285	0.884857	6.48526	0.0127091	High_vs_Not_AD	High_vs_Not_AD	Ast
IL7	Ast	-0.728938	5.42056	4.88559	0.0299463	High_vs_Not_AD	High_vs_Not_AD	Ast
HEY1	Ast	-0.55006	2.91998	7.14032	0.00914062	High_vs_Not_AD	High_vs_Not_AD	Ast
AC079209.2	Ast	-0.879232	-0.00965736	4.06555	0.0463904	High_vs_Not_AD	High_vs_Not_AD	Ast
FABP5	Ast	-0.849941	4.0549	4.05144	0.0475114	High_vs_Not_AD	High_vs_Not_AD	Ast
AC018616.1	Ast	-0.837293	2.99579	6.64628	0.0117834	High_vs_Not_AD	High_vs_Not_AD	Ast
AC105031.2	Ast	1.83787	0.830068	17.1031	8.06345876858795e-05	High_vs_Not_AD	High_vs_Not_AD	Ast
AF121898.1	Ast	0.736451	0.286426	6.86822	0.0102366	High_vs_Not_AD	High_vs_Not_AD	Ast
OSGIN2	Ast	-0.514035	5.43008	6.46506	0.0129355	High_vs_Not_AD	High_vs_Not_AD	Ast
AC010834.3	Ast	0.7213	0.152952	4.27011	0.0414901	High_vs_Not_AD	High_vs_Not_AD	Ast
CDH17	Ast	0.938267	0.0896165	4.94986	0.0283501	High_vs_Not_AD	High_vs_Not_AD	Ast
ESRP1	Ast	1.94432	0.953457	15.1121	0.000195646	High_vs_Not_AD	High_vs_Not_AD	Ast
AP003465.1	Ast	-0.802111	-0.248545	4.99099	0.0275834	High_vs_Not_AD	High_vs_Not_AD	Ast
AP003117.1	Ast	0.770419	0.215524	7.14583	0.0088496	High_vs_Not_AD	High_vs_Not_AD	Ast
RPL30	Ast	-0.523117	4.63066	7.71357	0.00682929	High_vs_Not_AD	High_vs_Not_AD	Ast
SNX31	Ast	-0.922096	3.75666	4.71352	0.0329047	High_vs_Not_AD	High_vs_Not_AD	Ast
KLF10	Ast	0.824073	1.32018	3.99869	0.0488884	High_vs_Not_AD	High_vs_Not_AD	Ast
BAALC-AS2	Ast	-1.39904	2.84158	8.94269	0.00370708	High_vs_Not_AD	High_vs_Not_AD	Ast
AC104248.1	Ast	-1.41906	1.68854	17.3939	7.53141152103144e-05	High_vs_Not_AD	High_vs_Not_AD	Ast
LINC01609	Ast	1.12457	1.25086	7.85903	0.00629405	High_vs_Not_AD	High_vs_Not_AD	Ast
AC090921.1	Ast	1.10896	0.665022	14.1126	0.000310432	High_vs_Not_AD	High_vs_Not_AD	Ast
AC090198.1	Ast	0.639565	0.691314	7.56063	0.00726395	High_vs_Not_AD	High_vs_Not_AD	Ast
LINC00861	Ast	1.35604	0.104014	13.8656	0.00032351	High_vs_Not_AD	High_vs_Not_AD	Ast
PRNCR1	Ast	0.628126	1.31271	5.23594	0.024709	High_vs_Not_AD	High_vs_Not_AD	Ast
CCN4	Ast	0.897673	1.01708	4.05235	0.0472414	High_vs_Not_AD	High_vs_Not_AD	Ast
AC083843.3	Ast	0.51986	3.45065	6.45989	0.0129751	High_vs_Not_AD	High_vs_Not_AD	Ast
AC107375.1	Ast	0.536706	4.35624	7.115	0.0092547	High_vs_Not_AD	High_vs_Not_AD	Ast
LNCOC1	Ast	-0.659272	2.63333	4.64014	0.0342569	High_vs_Not_AD	High_vs_Not_AD	Ast
AC234917.3	Ast	-0.543472	0.290609	5.2556	0.0241225	High_vs_Not_AD	High_vs_Not_AD	Ast
RPL8	Ast	-0.965598	3.95446	16.4593	0.000115192	High_vs_Not_AD	High_vs_Not_AD	Ast
SLC1A1	Ast	-0.673026	3.55379	4.42095	0.038662	High_vs_Not_AD	High_vs_Not_AD	Ast
FREM1	Ast	-0.732408	3.9724	7.20184	0.00885511	High_vs_Not_AD	High_vs_Not_AD	Ast
C9orf92	Ast	-0.67589	1.31239	4.90905	0.0294521	High_vs_Not_AD	High_vs_Not_AD	Ast
RPS6	Ast	-0.86695	4.31113	18.1752	5.48688142930863e-05	High_vs_Not_AD	High_vs_Not_AD	Ast
CDKN2B-AS1	Ast	-0.721568	3.1935	6.01819	0.0163469	High_vs_Not_AD	High_vs_Not_AD	Ast
TUSC1	Ast	-0.590538	0.776865	6.4732	0.0127301	High_vs_Not_AD	High_vs_Not_AD	Ast
LINC01241	Ast	-0.882347	2.56797	4.28747	0.0416296	High_vs_Not_AD	High_vs_Not_AD	Ast
EQTN	Ast	0.821175	-0.0718457	3.95342	0.0494015	High_vs_Not_AD	High_vs_Not_AD	Ast
MOB3B	Ast	0.595778	6.01408	4.7455	0.0323263	High_vs_Not_AD	High_vs_Not_AD	Ast
LINC01242	Ast	-1.48217	0.629007	6.34145	0.0133981	High_vs_Not_AD	High_vs_Not_AD	Ast
MYORG	Ast	0.5203	4.33488	5.04578	0.0274522	High_vs_Not_AD	High_vs_Not_AD	Ast
RMRP	Ast	1.64362	3.28728	16.424	0.000117139	High_vs_Not_AD	High_vs_Not_AD	Ast
TPM2	Ast	0.776692	3.01714	6.37846	0.0135402	High_vs_Not_AD	High_vs_Not_AD	Ast
HINT2	Ast	-0.594277	1.97267	5.7659	0.0186496	High_vs_Not_AD	High_vs_Not_AD	Ast
FAM221B	Ast	-0.825547	0.976136	4.66068	0.0336172	High_vs_Not_AD	High_vs_Not_AD	Ast
MELK	Ast	0.791077	0.99245	8.54293	0.00446348	High_vs_Not_AD	High_vs_Not_AD	Ast
TOMM5	Ast	-0.636458	3.004	9.36553	0.00301458	High_vs_Not_AD	High_vs_Not_AD	Ast
SHB	Ast	-0.500907	4.58267	5.08086	0.0269354	High_vs_Not_AD	High_vs_Not_AD	Ast
FAM27E3	Ast	0.529876	1.44823	5.37962	0.0228977	High_vs_Not_AD	High_vs_Not_AD	Ast
TMEM252-DT	Ast	1.13924	0.572491	11.3158	0.00113188	High_vs_Not_AD	High_vs_Not_AD	Ast
LINC01504	Ast	0.887044	1.39016	8.14905	0.00546209	High_vs_Not_AD	High_vs_Not_AD	Ast
AL137018.1	Ast	-0.703909	-0.0128453	4.85396	0.0298789	High_vs_Not_AD	High_vs_Not_AD	Ast
PRUNE2	Ast	-0.513063	5.34588	6.52817	0.0125187	High_vs_Not_AD	High_vs_Not_AD	Ast
AL591368.1	Ast	1.20686	3.96477	13.173	0.000499999	High_vs_Not_AD	High_vs_Not_AD	Ast
AL354920.1	Ast	-0.576723	0.467402	5.71262	0.018919	High_vs_Not_AD	High_vs_Not_AD	Ast
NXNL2	Ast	-0.516114	0.683624	4.70462	0.0327724	High_vs_Not_AD	High_vs_Not_AD	Ast
S1PR3	Ast	0.873013	2.11374	5.6299	0.0200607	High_vs_Not_AD	High_vs_Not_AD	Ast
SHC3	Ast	0.701043	5.03897	5.30665	0.0238473	High_vs_Not_AD	High_vs_Not_AD	Ast
CKS2	Ast	-0.701644	-0.256493	4.90141	0.0289552	High_vs_Not_AD	High_vs_Not_AD	Ast
AL161910.1	Ast	1.34407	0.386329	11.35	0.00109989	High_vs_Not_AD	High_vs_Not_AD	Ast
AL158071.4	Ast	0.930174	1.84155	4.78256	0.0316694	High_vs_Not_AD	High_vs_Not_AD	Ast
AL158071.3	Ast	0.852138	3.8108	6.89095	0.010383	High_vs_Not_AD	High_vs_Not_AD	Ast
AL158071.5	Ast	0.841935	0.939506	9.76336	0.00244287	High_vs_Not_AD	High_vs_Not_AD	Ast
AL353768.2	Ast	-1.10888	0.50891	8.20146	0.00518388	High_vs_Not_AD	High_vs_Not_AD	Ast
AL354861.2	Ast	0.965433	0.252785	6.99889	0.00953588	High_vs_Not_AD	High_vs_Not_AD	Ast
AL449403.1	Ast	-0.982454	0.323129	4.92917	0.0288095	High_vs_Not_AD	High_vs_Not_AD	Ast
AL449403.2	Ast	0.622229	3.69897	4.69283	0.0332791	High_vs_Not_AD	High_vs_Not_AD	Ast
AL590705.1	Ast	-0.925295	4.17131	16.9032	9.49196154928964e-05	High_vs_Not_AD	High_vs_Not_AD	Ast
AL590705.2	Ast	-1.56322	-0.0358744	14.6529	0.000219196	High_vs_Not_AD	High_vs_Not_AD	Ast
AL162394.1	Ast	-1.17579	3.01056	6.01768	0.0163485	High_vs_Not_AD	High_vs_Not_AD	Ast
KLF4	Ast	1.5929	1.23076	7.45074	0.00769619	High_vs_Not_AD	High_vs_Not_AD	Ast
COL27A1	Ast	0.801969	6.60184	6.63961	0.011816	High_vs_Not_AD	High_vs_Not_AD	Ast
DEC1	Ast	-1.71539	4.40659	11.9517	0.000878733	High_vs_Not_AD	High_vs_Not_AD	Ast
TNC	Ast	-1.51268	6.72625	11.01	0.00136674	High_vs_Not_AD	High_vs_Not_AD	Ast
AL137024.1	Ast	-0.790833	3.10535	6.77223	0.0110402	High_vs_Not_AD	High_vs_Not_AD	Ast
GSN	Ast	0.799852	7.57995	13.6495	0.00040205	High_vs_Not_AD	High_vs_Not_AD	Ast
AC007066.2	Ast	0.575046	1.78816	14.4151	0.000284434	High_vs_Not_AD	High_vs_Not_AD	Ast
AL390774.2	Ast	-0.954943	3.66534	5.55763	0.0208566	High_vs_Not_AD	High_vs_Not_AD	Ast
AL162724.2	Ast	-1.00329	0.0401085	7.02156	0.00935909	High_vs_Not_AD	High_vs_Not_AD	Ast
RPL35	Ast	-0.994207	4.25197	17.1672	8.46407777089548e-05	High_vs_Not_AD	High_vs_Not_AD	Ast
AL450263.1	Ast	-0.786863	0.933407	7.62132	0.00705376	High_vs_Not_AD	High_vs_Not_AD	Ast
PHYHD1	Ast	0.572189	6.97208	6.9243	0.0102034	High_vs_Not_AD	High_vs_Not_AD	Ast
LAMC3	Ast	0.649463	0.935227	6.43168	0.0130583	High_vs_Not_AD	High_vs_Not_AD	Ast
AL358781.1	Ast	-0.67516	0.603894	7.06563	0.00932203	High_vs_Not_AD	High_vs_Not_AD	Ast
AJM1	Ast	0.532073	2.60728	5.42435	0.0224018	High_vs_Not_AD	High_vs_Not_AD	Ast
ENTPD2	Ast	0.542708	4.62842	5.70919	0.0192368	High_vs_Not_AD	High_vs_Not_AD	Ast
ADARB2	Ast	0.796563	6.06225	7.54542	0.00743392	High_vs_Not_AD	High_vs_Not_AD	Ast
LINC02645	Ast	0.742084	-0.269767	4.50509	0.0360609	High_vs_Not_AD	High_vs_Not_AD	Ast
PFKP	Ast	1.16694	7.96884	8.23552	0.00525596	High_vs_Not_AD	High_vs_Not_AD	Ast
NET1	Ast	-0.731139	1.16755	5.05135	0.0272393	High_vs_Not_AD	High_vs_Not_AD	Ast
ITIH5	Ast	1.1449	2.25727	4.11107	0.0458888	High_vs_Not_AD	High_vs_Not_AD	Ast
ITIH2	Ast	-0.684281	-0.0860158	4.11222	0.0452047	High_vs_Not_AD	High_vs_Not_AD	Ast
PROSER2	Ast	-0.924207	0.580951	7.60309	0.00704444	High_vs_Not_AD	High_vs_Not_AD	Ast
CCDC3	Ast	0.83225	5.66249	10.623	0.00164262	High_vs_Not_AD	High_vs_Not_AD	Ast
AL157392.2	Ast	-1.00773	-0.122323	8.38404	0.00463133	High_vs_Not_AD	High_vs_Not_AD	Ast
PTER	Ast	0.533671	2.40263	4.40333	0.0390416	High_vs_Not_AD	High_vs_Not_AD	Ast
AL390783.1	Ast	-0.867854	5.54045	4.49519	0.0370973	High_vs_Not_AD	High_vs_Not_AD	Ast
AC069549.1	Ast	-0.827202	-0.306592	4.29578	0.0404965	High_vs_Not_AD	High_vs_Not_AD	Ast
C10orf113	Ast	0.610898	1.73294	5.45103	0.0220652	High_vs_Not_AD	High_vs_Not_AD	Ast
C10orf67	Ast	0.645693	0.661076	4.594	0.0348611	High_vs_Not_AD	High_vs_Not_AD	Ast
AL157385.2	Ast	-0.792072	0.0656329	5.81494	0.0177411	High_vs_Not_AD	High_vs_Not_AD	Ast
LINC00836	Ast	-0.981423	5.33858	4.63659	0.0343169	High_vs_Not_AD	High_vs_Not_AD	Ast
MKX	Ast	-0.731098	1.93791	5.42991	0.0223055	High_vs_Not_AD	High_vs_Not_AD	Ast
ALOX5	Ast	-0.597175	0.179356	4.30278	0.0407324	High_vs_Not_AD	High_vs_Not_AD	Ast
LINC00842	Ast	-0.834348	1.85168	4.24588	0.0425466	High_vs_Not_AD	High_vs_Not_AD	Ast
GDF10	Ast	-0.774457	1.75609	6.69977	0.0114363	High_vs_Not_AD	High_vs_Not_AD	Ast
FAM25G	Ast	2.26598	-0.227646	17.8054	4.90633993084263e-05	High_vs_Not_AD	High_vs_Not_AD	Ast
AL442003.1	Ast	-0.672508	1.94343	4.29127	0.0415163	High_vs_Not_AD	High_vs_Not_AD	Ast
PCDH15	Ast	-0.665841	3.80308	8.68504	0.00420741	High_vs_Not_AD	High_vs_Not_AD	Ast
AC022387.2	Ast	0.744491	2.30162	8.27288	0.00516259	High_vs_Not_AD	High_vs_Not_AD	Ast
AC016821.1	Ast	0.637671	3.84038	4.78558	0.03163	High_vs_Not_AD	High_vs_Not_AD	Ast
LINC02636	Ast	-0.519752	3.05704	4.09146	0.046462	High_vs_Not_AD	High_vs_Not_AD	Ast
CDH23	Ast	0.917039	6.57695	6.74275	0.011203	High_vs_Not_AD	High_vs_Not_AD	Ast
VSIR	Ast	0.718593	6.18948	7.7011	0.00687151	High_vs_Not_AD	High_vs_Not_AD	Ast
ANAPC16	Ast	0.534914	6.77625	5.4253	0.0223769	High_vs_Not_AD	High_vs_Not_AD	Ast
DNAJC9-AS1	Ast	-0.527084	0.846602	4.01656	0.0481948	High_vs_Not_AD	High_vs_Not_AD	Ast
SYNPO2L	Ast	-0.651447	2.37718	4.52427	0.0365094	High_vs_Not_AD	High_vs_Not_AD	Ast
ZNF503-AS1	Ast	0.713755	1.08903	4.93927	0.0289696	High_vs_Not_AD	High_vs_Not_AD	Ast
KCNMA1-AS1	Ast	-0.814129	3.83155	4.70752	0.0330127	High_vs_Not_AD	High_vs_Not_AD	Ast
AC010163.1	Ast	0.638495	0.249088	5.41311	0.0221446	High_vs_Not_AD	High_vs_Not_AD	Ast
AL512662.2	Ast	0.734839	6.63867	5.60009	0.0203838	High_vs_Not_AD	High_vs_Not_AD	Ast
SFTPD-AS1	Ast	0.761216	3.85852	4.16487	0.044582	High_vs_Not_AD	High_vs_Not_AD	Ast
AC010157.1	Ast	-0.874035	1.87717	5.80022	0.0183082	High_vs_Not_AD	High_vs_Not_AD	Ast
CDHR1	Ast	0.931526	1.14694	10.1943	0.0019925	High_vs_Not_AD	High_vs_Not_AD	Ast
GRID1-AS1	Ast	-0.892593	1.56033	4.3909	0.0391966	High_vs_Not_AD	High_vs_Not_AD	Ast
SNCG	Ast	0.876409	3.41105	4.05759	0.0473518	High_vs_Not_AD	High_vs_Not_AD	Ast
AL355334.2	Ast	-1.03585	-0.0306718	14.4543	0.000246069	High_vs_Not_AD	High_vs_Not_AD	Ast
ACTA2	Ast	0.784134	3.96482	4.28774	0.0416259	High_vs_Not_AD	High_vs_Not_AD	Ast
AL157394.3	Ast	1.11365	0.720274	6.74873	0.0110138	High_vs_Not_AD	High_vs_Not_AD	Ast
FAS	Ast	1.08075	5.04354	7.75615	0.00668379	High_vs_Not_AD	High_vs_Not_AD	Ast
SLC16A12	Ast	-1.07294	0.494348	5.58451	0.0201763	High_vs_Not_AD	High_vs_Not_AD	Ast
MYOF	Ast	-1.6025	2.85192	8.04645	0.00577972	High_vs_Not_AD	High_vs_Not_AD	Ast
AL157834.1	Ast	-0.568947	2.82299	4.51251	0.0367566	High_vs_Not_AD	High_vs_Not_AD	Ast
ACSM6	Ast	-0.929555	2.8361	4.01375	0.0485288	High_vs_Not_AD	High_vs_Not_AD	Ast
HPSE2	Ast	0.858399	9.68867	5.17204	0.0256387	High_vs_Not_AD	High_vs_Not_AD	Ast
OLMALINC	Ast	0.526112	6.39832	4.61603	0.0347063	High_vs_Not_AD	High_vs_Not_AD	Ast
ITPRIP	Ast	1.07277	2.9528	12.9402	0.000557074	High_vs_Not_AD	High_vs_Not_AD	Ast
SORCS3	Ast	-0.720998	4.30577	6.02316	0.0162987	High_vs_Not_AD	High_vs_Not_AD	Ast
NRAP	Ast	1.56614	0.511795	18.7234	3.86864326497747e-05	High_vs_Not_AD	High_vs_Not_AD	Ast
AFAP1L2	Ast	-0.58468	0.628262	5.63508	0.0197688	High_vs_Not_AD	High_vs_Not_AD	Ast
PLPP4	Ast	-0.911383	4.34553	8.8891	0.0038036	High_vs_Not_AD	High_vs_Not_AD	Ast
AC023282.1	Ast	-0.823485	4.65739	7.54979	0.0074184	High_vs_Not_AD	High_vs_Not_AD	Ast
BX842242.1	Ast	0.501348	1.06974	4.65301	0.0339046	High_vs_Not_AD	High_vs_Not_AD	Ast
LINC02641	Ast	-0.747644	1.12623	4.40468	0.0388584	High_vs_Not_AD	High_vs_Not_AD	Ast
AL158835.1	Ast	-0.647392	-0.00428711	4.51752	0.0360315	High_vs_Not_AD	High_vs_Not_AD	Ast
MMP21	Ast	-0.699792	1.08724	6.40458	0.0132425	High_vs_Not_AD	High_vs_Not_AD	Ast
PTPRE	Ast	0.653584	6.01161	5.2074	0.0251547	High_vs_Not_AD	High_vs_Not_AD	Ast
AL354950.1	Ast	-0.688934	0.0459685	4.45754	0.0372687	High_vs_Not_AD	High_vs_Not_AD	Ast
MIR210HG	Ast	0.772799	2.6286	3.96534	0.0498841	High_vs_Not_AD	High_vs_Not_AD	Ast
RPLP2	Ast	-0.770468	4.78961	13.6268	0.00040633	High_vs_Not_AD	High_vs_Not_AD	Ast
CRACR2B	Ast	0.635483	1.07918	5.30857	0.023737	High_vs_Not_AD	High_vs_Not_AD	Ast
POLR2L	Ast	-0.512066	2.60755	5.14889	0.0259724	High_vs_Not_AD	High_vs_Not_AD	Ast
MUC6	Ast	-1.18523	0.425318	8.28796	0.00493721	High_vs_Not_AD	High_vs_Not_AD	Ast
DUSP8	Ast	0.870473	1.9115	8.59994	0.00438462	High_vs_Not_AD	High_vs_Not_AD	Ast
CTSD	Ast	0.719016	5.81791	7.03377	0.00964635	High_vs_Not_AD	High_vs_Not_AD	Ast
SLC22A18	Ast	0.616455	1.36648	4.07191	0.0469146	High_vs_Not_AD	High_vs_Not_AD	Ast
HBB	Ast	2.23703	-0.139614	8.44319	0.00434953	High_vs_Not_AD	High_vs_Not_AD	Ast
OR51B5	Ast	0.953208	-0.42592	4.74528	0.0313337	High_vs_Not_AD	High_vs_Not_AD	Ast
CCKBR	Ast	-0.813421	-0.0930792	6.25413	0.0139858	High_vs_Not_AD	High_vs_Not_AD	Ast
RPL27A	Ast	-0.61533	4.16353	14.1814	0.000316285	High_vs_Not_AD	High_vs_Not_AD	Ast
MTRNR2L8	Ast	2.62324	2.75214	13.9703	0.000347905	High_vs_Not_AD	High_vs_Not_AD	Ast
AC107881.1	Ast	-1.14336	-0.13476	8.62516	0.00408181	High_vs_Not_AD	High_vs_Not_AD	Ast
PDE3B	Ast	0.620209	8.23279	5.53836	0.0210653	High_vs_Not_AD	High_vs_Not_AD	Ast
RPS13	Ast	-0.664725	4.17313	9.15019	0.00334635	High_vs_Not_AD	High_vs_Not_AD	Ast
KCNJ11	Ast	0.809295	-0.15784	6.11788	0.015002	High_vs_Not_AD	High_vs_Not_AD	Ast
USH1C	Ast	-1.02667	3.98489	6.62796	0.0118914	High_vs_Not_AD	High_vs_Not_AD	Ast
LDHAL6A	Ast	-0.643843	0.394681	4.51547	0.0362767	High_vs_Not_AD	High_vs_Not_AD	Ast
AC130307.1	Ast	0.935299	0.215565	3.9708	0.0490821	High_vs_Not_AD	High_vs_Not_AD	Ast
AC006299.1	Ast	1.05859	3.56616	13.3026	0.000471465	High_vs_Not_AD	High_vs_Not_AD	Ast
BBOX1-AS1	Ast	-0.675402	4.60791	4.39926	0.0391221	High_vs_Not_AD	High_vs_Not_AD	Ast
LINC02742	Ast	1.23317	2.83645	13.6964	0.000394533	High_vs_Not_AD	High_vs_Not_AD	Ast
AL035078.1	Ast	1.21485	0.755093	8.05663	0.00563832	High_vs_Not_AD	High_vs_Not_AD	Ast
C11orf96	Ast	2.32147	2.87398	4.19206	0.043868	High_vs_Not_AD	High_vs_Not_AD	Ast
AC103855.2	Ast	1.06503	1.47217	6.98846	0.00983351	High_vs_Not_AD	High_vs_Not_AD	Ast
DGKZ	Ast	0.761112	6.34289	8.01837	0.00585856	High_vs_Not_AD	High_vs_Not_AD	Ast
HARBI1	Ast	0.52013	2.17797	5.84478	0.0179119	High_vs_Not_AD	High_vs_Not_AD	Ast
AC090589.2	Ast	-0.734711	1.54545	6.60971	0.0119574	High_vs_Not_AD	High_vs_Not_AD	Ast
PTPRJ	Ast	0.63026	7.54983	8.66544	0.00424586	High_vs_Not_AD	High_vs_Not_AD	Ast
APLNR	Ast	-1.03204	3.82053	4.54043	0.0361887	High_vs_Not_AD	High_vs_Not_AD	Ast
SLC43A3	Ast	0.802047	2.66807	5.14746	0.0259924	High_vs_Not_AD	High_vs_Not_AD	Ast
TIMM10	Ast	-0.841384	1.86137	8.85858	0.00385455	High_vs_Not_AD	High_vs_Not_AD	Ast
AP003778.1	Ast	0.900767	0.151069	5.40066	0.0221722	High_vs_Not_AD	High_vs_Not_AD	Ast
CD5	Ast	-0.767327	0.273189	4.0379	0.0472886	High_vs_Not_AD	High_vs_Not_AD	Ast
VWCE	Ast	-0.598386	4.01681	5.1873	0.0254332	High_vs_Not_AD	High_vs_Not_AD	Ast
AP003108.1	Ast	-0.550727	2.39068	5.66828	0.0196652	High_vs_Not_AD	High_vs_Not_AD	Ast
MYRF	Ast	0.568332	1.48745	4.99914	0.0281118	High_vs_Not_AD	High_vs_Not_AD	Ast
FTH1	Ast	-1.24193	8.91253	10.4522	0.00178202	High_vs_Not_AD	High_vs_Not_AD	Ast
AP001160.4	Ast	1.17131	-0.193665	11.9731	0.000772974	High_vs_Not_AD	High_vs_Not_AD	Ast
PLAAT5	Ast	0.747271	2.34639	9.86158	0.00236977	High_vs_Not_AD	High_vs_Not_AD	Ast
FERMT3	Ast	-0.587136	1.2871	4.1538	0.044754	High_vs_Not_AD	High_vs_Not_AD	Ast
FKBP2	Ast	-0.619348	1.89404	6.03589	0.0161818	High_vs_Not_AD	High_vs_Not_AD	Ast
TRMT112	Ast	-0.557593	2.07698	5.90552	0.0173399	High_vs_Not_AD	High_vs_Not_AD	Ast
PRDX5	Ast	-0.694957	3.25048	11.8631	0.000916488	High_vs_Not_AD	High_vs_Not_AD	Ast
FAU	Ast	-0.951661	3.91718	12.6498	0.000635885	High_vs_Not_AD	High_vs_Not_AD	Ast
SIPA1	Ast	0.613517	1.9435	4.17641	0.0442911	High_vs_Not_AD	High_vs_Not_AD	Ast
AP001266.2	Ast	-0.615955	3.51194	4.66342	0.0338229	High_vs_Not_AD	High_vs_Not_AD	Ast
FOSL1	Ast	1.41844	0.787451	5.44011	0.0219694	High_vs_Not_AD	High_vs_Not_AD	Ast
C11orf68	Ast	0.59284	2.30002	7.39322	0.00803693	High_vs_Not_AD	High_vs_Not_AD	Ast
BANF1	Ast	-0.540488	2.6503	7.12124	0.00923167	High_vs_Not_AD	High_vs_Not_AD	Ast
AP001107.1	Ast	-0.801413	0.319117	5.95128	0.016566	High_vs_Not_AD	High_vs_Not_AD	Ast
SYT12	Ast	0.566771	4.14955	6.98226	0.00990625	High_vs_Not_AD	High_vs_Not_AD	Ast
RHOD	Ast	0.733113	1.06901	5.86236	0.0176524	High_vs_Not_AD	High_vs_Not_AD	Ast
AP003419.3	Ast	0.946264	0.022878	7.03275	0.00930412	High_vs_Not_AD	High_vs_Not_AD	Ast
PITPNM1	Ast	0.57852	1.72293	4.00105	0.0488531	High_vs_Not_AD	High_vs_Not_AD	Ast
MRGPRF	Ast	1.54659	1.62205	8.74045	0.00406967	High_vs_Not_AD	High_vs_Not_AD	Ast
AP000763.3	Ast	-0.560244	1.6228	4.87512	0.030074	High_vs_Not_AD	High_vs_Not_AD	Ast
AP001372.1	Ast	1.25067	0.496806	12.4685	0.000648243	High_vs_Not_AD	High_vs_Not_AD	Ast
ARRB1	Ast	0.613466	7.07214	7.98784	0.00594881	High_vs_Not_AD	High_vs_Not_AD	Ast
AP003119.2	Ast	-1.40866	-0.0476396	15.3054	0.000162457	High_vs_Not_AD	High_vs_Not_AD	Ast
CAPN5	Ast	-0.541619	3.04935	6.91335	0.0102674	High_vs_Not_AD	High_vs_Not_AD	Ast
AP006295.1	Ast	0.82443	0.267061	4.19649	0.0432644	High_vs_Not_AD	High_vs_Not_AD	Ast
LINC02720	Ast	0.787708	1.89831	4.09544	0.0463122	High_vs_Not_AD	High_vs_Not_AD	Ast
AP000793.1	Ast	0.880084	0.98101	6.45037	0.0128872	High_vs_Not_AD	High_vs_Not_AD	Ast
AP000857.2	Ast	-0.86236	2.2705	5.47437	0.0217918	High_vs_Not_AD	High_vs_Not_AD	Ast
AP001528.1	Ast	-0.861895	5.14991	6.43352	0.0131495	High_vs_Not_AD	High_vs_Not_AD	Ast
FZD4	Ast	-0.589835	3.78229	5.28678	0.0241075	High_vs_Not_AD	High_vs_Not_AD	Ast
GRM5-AS1	Ast	-1.29635	-0.522825	9.40917	0.00268478	High_vs_Not_AD	High_vs_Not_AD	Ast
NOX4	Ast	-1.00685	0.353808	9.21	0.00311591	High_vs_Not_AD	High_vs_Not_AD	Ast
SCARNA9	Ast	1.0889	0.424355	9.54389	0.00265563	High_vs_Not_AD	High_vs_Not_AD	Ast
AP000787.1	Ast	-0.686247	4.7608	6.13065	0.015403	High_vs_Not_AD	High_vs_Not_AD	Ast
ANGPTL5	Ast	1.51245	0.708227	15.6555	0.000152272	High_vs_Not_AD	High_vs_Not_AD	Ast
LINC02552	Ast	-0.701699	0.176858	5.70282	0.018883	High_vs_Not_AD	High_vs_Not_AD	Ast
AP001001.1	Ast	-1.05069	0.227919	7.28497	0.00822166	High_vs_Not_AD	High_vs_Not_AD	Ast
SLC35F2	Ast	-0.610589	2.07074	5.87213	0.0176402	High_vs_Not_AD	High_vs_Not_AD	Ast
HSPB2	Ast	0.84008	2.00388	4.86994	0.0301996	High_vs_Not_AD	High_vs_Not_AD	Ast
AP003100.2	Ast	1.42852	0.627525	12.5066	0.000642495	High_vs_Not_AD	High_vs_Not_AD	Ast
ANKK1	Ast	-0.57527	1.40895	5.37253	0.0229682	High_vs_Not_AD	High_vs_Not_AD	Ast
AP000462.1	Ast	-0.78511	6.2874	4.35616	0.040067	High_vs_Not_AD	High_vs_Not_AD	Ast
TAGLN	Ast	-0.696342	2.62904	7.49045	0.00764943	High_vs_Not_AD	High_vs_Not_AD	Ast
DSCAML1	Ast	-0.76607	4.60623	7.1817	0.00894472	High_vs_Not_AD	High_vs_Not_AD	Ast
FXYD2	Ast	-0.81731	-0.340854	4.1168	0.0448704	High_vs_Not_AD	High_vs_Not_AD	Ast
CCDC84-DT	Ast	-0.556568	1.53346	8.35411	0.00493856	High_vs_Not_AD	High_vs_Not_AD	Ast
RPS25	Ast	-1.0216	5.18331	13.7683	0.000381025	High_vs_Not_AD	High_vs_Not_AD	Ast
USP2-AS1	Ast	0.538927	2.78153	7.43389	0.00787309	High_vs_Not_AD	High_vs_Not_AD	Ast
AP002762.3	Ast	-0.599825	1.40355	3.97569	0.0494938	High_vs_Not_AD	High_vs_Not_AD	Ast
AP000866.2	Ast	-1.02017	-0.183518	11.3334	0.00106489	High_vs_Not_AD	High_vs_Not_AD	Ast
SLC37A2	Ast	-0.569348	0.72955	3.97189	0.0494142	High_vs_Not_AD	High_vs_Not_AD	Ast
AP000708.1	Ast	-0.786528	1.02339	9.08378	0.00339889	High_vs_Not_AD	High_vs_Not_AD	Ast
ETS1	Ast	0.59393	2.57664	5.87596	0.0176197	High_vs_Not_AD	High_vs_Not_AD	Ast
ADAMTS8	Ast	-0.742902	0.322137	5.67232	0.019259	High_vs_Not_AD	High_vs_Not_AD	Ast
AP000844.1	Ast	-0.818959	1.27655	4.15325	0.0446836	High_vs_Not_AD	High_vs_Not_AD	Ast
AC005343.1	Ast	-0.840045	-0.204624	4.2821	0.0409655	High_vs_Not_AD	High_vs_Not_AD	Ast
GALNT8	Ast	0.663043	4.52259	4.78963	0.0315574	High_vs_Not_AD	High_vs_Not_AD	Ast
MRPL51	Ast	-0.837182	3.2798	11.2169	0.00124103	High_vs_Not_AD	High_vs_Not_AD	Ast
MLF2	Ast	0.522427	4.07728	4.35643	0.0400648	High_vs_Not_AD	High_vs_Not_AD	Ast
SLC2A3	Ast	-1.13314	3.5154	6.88879	0.0103963	High_vs_Not_AD	High_vs_Not_AD	Ast
MFAP5	Ast	0.59591	0.11114	4.00826	0.0480586	High_vs_Not_AD	High_vs_Not_AD	Ast
AC092490.2	Ast	2.36061	2.09307	19.6877	2.8498482032477e-05	High_vs_Not_AD	High_vs_Not_AD	Ast
A2ML1-AS1	Ast	-0.835532	4.3762	4.76464	0.0319931	High_vs_Not_AD	High_vs_Not_AD	Ast
A2ML1	Ast	0.679262	5.73853	6.00818	0.0164251	High_vs_Not_AD	High_vs_Not_AD	Ast
PZP	Ast	-0.780162	2.85079	4.59103	0.0351933	High_vs_Not_AD	High_vs_Not_AD	Ast
BCL2L14	Ast	-0.797978	5.22462	4.23329	0.0429052	High_vs_Not_AD	High_vs_Not_AD	Ast
AC010168.2	Ast	0.80641	0.975795	12.2563	0.000747288	High_vs_Not_AD	High_vs_Not_AD	Ast
AC007655.2	Ast	0.845506	0.246446	8.27507	0.00496847	High_vs_Not_AD	High_vs_Not_AD	Ast
MGP	Ast	-0.890397	0.199531	6.14639	0.014894	High_vs_Not_AD	High_vs_Not_AD	Ast
AC084816.1	Ast	0.581838	2.75798	4.19127	0.0439373	High_vs_Not_AD	High_vs_Not_AD	Ast
FAR2	Ast	-0.558837	3.09591	6.08941	0.0157463	High_vs_Not_AD	High_vs_Not_AD	Ast
AC023157.3	Ast	-0.506379	0.836386	6.16422	0.0149771	High_vs_Not_AD	High_vs_Not_AD	Ast
AC048344.4	Ast	0.551853	0.586808	4.12475	0.045284	High_vs_Not_AD	High_vs_Not_AD	Ast
AC140847.2	Ast	-1.16655	-0.291131	14.8495	0.000199696	High_vs_Not_AD	High_vs_Not_AD	Ast
CPNE8-AS1	Ast	-1.03837	0.177095	5.90885	0.0168493	High_vs_Not_AD	High_vs_Not_AD	Ast
C12orf40	Ast	0.647175	2.55826	5.41687	0.0224889	High_vs_Not_AD	High_vs_Not_AD	Ast
AC025031.1	Ast	-1.04569	-0.317187	4.43331	0.0374631	High_vs_Not_AD	High_vs_Not_AD	Ast
AC024257.1	Ast	-1.0744	2.00744	4.16066	0.0446184	High_vs_Not_AD	High_vs_Not_AD	Ast
FAM186B	Ast	-0.630835	0.388297	5.63212	0.0197179	High_vs_Not_AD	High_vs_Not_AD	Ast
FAIM2	Ast	0.697986	5.24855	8.53285	0.00453408	High_vs_Not_AD	High_vs_Not_AD	Ast
AQP6	Ast	0.919041	0.957337	5.75236	0.0186919	High_vs_Not_AD	High_vs_Not_AD	Ast
COX14	Ast	-0.861921	2.34611	11.6042	0.00103381	High_vs_Not_AD	High_vs_Not_AD	Ast
METTL7A	Ast	0.587838	6.79478	7.3075	0.00838798	High_vs_Not_AD	High_vs_Not_AD	Ast
AC023509.2	Ast	-0.683343	0.881578	4.13519	0.0450945	High_vs_Not_AD	High_vs_Not_AD	Ast
AC023509.6	Ast	-0.749971	5.67683	4.58578	0.0352892	High_vs_Not_AD	High_vs_Not_AD	Ast
SCAT2	Ast	-0.633794	1.6084	4.12011	0.0456507	High_vs_Not_AD	High_vs_Not_AD	Ast
METTL7B	Ast	0.666246	1.78482	4.33713	0.0404817	High_vs_Not_AD	High_vs_Not_AD	Ast
BLOC1S1	Ast	-0.652858	3.6533	9.77908	0.002465	High_vs_Not_AD	High_vs_Not_AD	Ast
AC009779.2	Ast	-0.541858	2.55159	4.65497	0.0339829	High_vs_Not_AD	High_vs_Not_AD	Ast
RPS26	Ast	-0.65427	3.87954	6.59029	0.0121251	High_vs_Not_AD	High_vs_Not_AD	Ast
RPL41	Ast	-0.782743	5.82784	9.26085	0.00316902	High_vs_Not_AD	High_vs_Not_AD	Ast
AC073896.3	Ast	-0.657058	0.372051	4.71298	0.0325079	High_vs_Not_AD	High_vs_Not_AD	Ast
TAC3	Ast	-0.981903	-0.524449	4.48441	0.0362705	High_vs_Not_AD	High_vs_Not_AD	Ast
STAC3	Ast	-0.680657	1.61562	9.07629	0.00345039	High_vs_Not_AD	High_vs_Not_AD	Ast
AC025165.2	Ast	-0.758863	1.79429	4.03734	0.0478408	High_vs_Not_AD	High_vs_Not_AD	Ast
AC020637.1	Ast	0.706792	0.974588	4.94675	0.0287889	High_vs_Not_AD	High_vs_Not_AD	Ast
CPM	Ast	0.530068	5.22912	4.43554	0.0383418	High_vs_Not_AD	High_vs_Not_AD	Ast
AC107032.3	Ast	-0.929076	-0.425491	4.16785	0.043556	High_vs_Not_AD	High_vs_Not_AD	Ast
CSRP2	Ast	-0.763611	3.66032	7.37612	0.00810398	High_vs_Not_AD	High_vs_Not_AD	Ast
AC073571.1	Ast	-0.815042	2.53898	4.67141	0.0336639	High_vs_Not_AD	High_vs_Not_AD	Ast
AC073569.2	Ast	-0.765426	2.78156	5.65599	0.0197934	High_vs_Not_AD	High_vs_Not_AD	Ast
AC091214.1	Ast	-0.650551	0.959396	6.72151	0.0112287	High_vs_Not_AD	High_vs_Not_AD	Ast
DUSP6	Ast	0.740996	2.07486	5.57017	0.0207192	High_vs_Not_AD	High_vs_Not_AD	Ast
DCN	Ast	1.35732	1.89709	5.03276	0.027648	High_vs_Not_AD	High_vs_Not_AD	Ast
LINC02413	Ast	-1.1611	-0.554966	5.83507	0.0171969	High_vs_Not_AD	High_vs_Not_AD	Ast
LINC02412	Ast	-1.23858	0.0741307	5.94394	0.0165045	High_vs_Not_AD	High_vs_Not_AD	Ast
NUDT4	Ast	0.729204	5.53893	6.39454	0.0134187	High_vs_Not_AD	High_vs_Not_AD	Ast
SOCS2-AS1	Ast	-1.04163	1.46491	10.8668	0.0014476	High_vs_Not_AD	High_vs_Not_AD	Ast
SOCS2	Ast	-0.74688	1.23693	5.28167	0.0240887	High_vs_Not_AD	High_vs_Not_AD	Ast
AC073655.3	Ast	-1.08224	-0.483128	7.0478	0.00898843	High_vs_Not_AD	High_vs_Not_AD	Ast
TMCC3	Ast	-0.677724	2.23841	5.90164	0.0173718	High_vs_Not_AD	High_vs_Not_AD	Ast
CCDC38	Ast	-0.783728	0.182748	5.18243	0.0250239	High_vs_Not_AD	High_vs_Not_AD	Ast
ASCL1	Ast	1.10868	3.34144	8.09972	0.00562903	High_vs_Not_AD	High_vs_Not_AD	Ast
AC068643.1	Ast	0.80642	2.67146	5.88908	0.0174992	High_vs_Not_AD	High_vs_Not_AD	Ast
AC025265.1	Ast	-0.754265	0.431705	6.95756	0.00980055	High_vs_Not_AD	High_vs_Not_AD	Ast
NT5DC3	Ast	-0.620834	3.1724	6.29929	0.0141091	High_vs_Not_AD	High_vs_Not_AD	Ast
CHST11	Ast	0.52927	8.46428	5.29726	0.0239672	High_vs_Not_AD	High_vs_Not_AD	Ast
AC007541.1	Ast	-0.52123	1.21819	7.11868	0.00918138	High_vs_Not_AD	High_vs_Not_AD	Ast
BTBD11	Ast	-0.860034	3.92861	8.35526	0.0049539	High_vs_Not_AD	High_vs_Not_AD	Ast
WSCD2	Ast	-0.578616	2.42728	4.08506	0.0466165	High_vs_Not_AD	High_vs_Not_AD	Ast
GLTP	Ast	0.524463	4.17759	7.70908	0.00684539	High_vs_Not_AD	High_vs_Not_AD	Ast
RPL6	Ast	-0.675388	4.68391	14.9078	0.000228268	High_vs_Not_AD	High_vs_Not_AD	Ast
CFAP73	Ast	1.13311	0.157126	4.25872	0.0416533	High_vs_Not_AD	High_vs_Not_AD	Ast
SDSL	Ast	-0.926847	1.82561	8.27286	0.00515025	High_vs_Not_AD	High_vs_Not_AD	Ast
LINC02457	Ast	0.890538	0.075108	4.84849	0.0299912	High_vs_Not_AD	High_vs_Not_AD	Ast
LINC00173	Ast	-0.807396	4.42355	6.67045	0.0116308	High_vs_Not_AD	High_vs_Not_AD	Ast
MAP1LC3B2	Ast	-1.35702	4.47993	9.04635	0.00352076	High_vs_Not_AD	High_vs_Not_AD	Ast
AC127164.1	Ast	-0.748718	1.38698	6.23933	0.0144978	High_vs_Not_AD	High_vs_Not_AD	Ast
TESC-AS1	Ast	-0.67298	0.6214	5.51093	0.0210991	High_vs_Not_AD	High_vs_Not_AD	Ast
KSR2	Ast	-0.674581	5.06859	8.52594	0.00454981	High_vs_Not_AD	High_vs_Not_AD	Ast
HPD	Ast	-0.556811	0.139718	5.94904	0.016556	High_vs_Not_AD	High_vs_Not_AD	Ast
ABCB9	Ast	0.520529	5.24859	8.83323	0.00390873	High_vs_Not_AD	High_vs_Not_AD	Ast
AC068790.3	Ast	1.23114	0.239272	14.5615	0.00024074	High_vs_Not_AD	High_vs_Not_AD	Ast
LINC02826	Ast	-1.74329	1.23634	17.5633	6.74724591011848e-05	High_vs_Not_AD	High_vs_Not_AD	Ast
LINC02405	Ast	-0.692633	0.522312	4.21234	0.043032	High_vs_Not_AD	High_vs_Not_AD	Ast
LINC00621	Ast	0.508815	2.89794	4.49677	0.0370786	High_vs_Not_AD	High_vs_Not_AD	Ast
TNFRSF19	Ast	-0.842503	0.989357	7.17115	0.00887802	High_vs_Not_AD	High_vs_Not_AD	Ast
USP12-AS1	Ast	-0.928287	-0.233671	5.7009	0.0187215	High_vs_Not_AD	High_vs_Not_AD	Ast
LINC02340	Ast	-0.720982	6.10862	5.59782	0.0204086	High_vs_Not_AD	High_vs_Not_AD	Ast
RPL21	Ast	-0.699779	5.03995	18.1333	5.58231572655806e-05	High_vs_Not_AD	High_vs_Not_AD	Ast
LINC00544	Ast	2.44637	-0.0782807	14.2745	0.000257155	High_vs_Not_AD	High_vs_Not_AD	Ast
AL353648.1	Ast	-0.658288	1.0351	4.58068	0.0352239	High_vs_Not_AD	High_vs_Not_AD	Ast
STARD13	Ast	0.523666	8.69189	9.65742	0.00261269	High_vs_Not_AD	High_vs_Not_AD	Ast
DCLK1	Ast	-0.856358	7.83101	5.3613	0.0231573	High_vs_Not_AD	High_vs_Not_AD	Ast
SMAD9	Ast	-0.602757	6.15196	4.65557	0.0339603	High_vs_Not_AD	High_vs_Not_AD	Ast
SMAD9-IT1	Ast	-0.912947	1.08008	11.9787	0.00084738	High_vs_Not_AD	High_vs_Not_AD	Ast
EPSTI1	Ast	-0.726578	2.20308	5.00857	0.0279845	High_vs_Not_AD	High_vs_Not_AD	Ast
AL138960.1	Ast	0.710351	0.932354	7.70788	0.00677596	High_vs_Not_AD	High_vs_Not_AD	Ast
SLC25A30-AS1	Ast	0.714244	0.786135	7.12399	0.00909005	High_vs_Not_AD	High_vs_Not_AD	Ast
CPB2	Ast	-0.891674	2.12405	5.57415	0.0206388	High_vs_Not_AD	High_vs_Not_AD	Ast
RUBCNL	Ast	0.569384	4.81144	7.73744	0.00674725	High_vs_Not_AD	High_vs_Not_AD	Ast
HTR2A	Ast	-0.657926	2.32006	8.48642	0.00463722	High_vs_Not_AD	High_vs_Not_AD	Ast
CAB39L	Ast	0.636877	7.41933	10.3471	0.00187394	High_vs_Not_AD	High_vs_Not_AD	Ast
TMEM272	Ast	-0.729365	0.910107	9.66316	0.00255599	High_vs_Not_AD	High_vs_Not_AD	Ast
HNRNPA1L2	Ast	0.604597	0.404671	4.97163	0.0282126	High_vs_Not_AD	High_vs_Not_AD	Ast
PCDH8	Ast	-0.758762	0.355224	4.63593	0.0338508	High_vs_Not_AD	High_vs_Not_AD	Ast
LINC00558	Ast	2.39905	1.15947	18.0951	5.28476603032352e-05	High_vs_Not_AD	High_vs_Not_AD	Ast
PCDH17	Ast	0.66836	6.55528	10.9967	0.00137538	High_vs_Not_AD	High_vs_Not_AD	Ast
DACH1	Ast	0.667293	5.68821	4.10986	0.0459727	High_vs_Not_AD	High_vs_Not_AD	Ast
AL590807.1	Ast	0.873346	5.72923	6.80553	0.0108463	High_vs_Not_AD	High_vs_Not_AD	Ast
AL162493.1	Ast	0.873378	1.60619	4.10679	0.0459782	High_vs_Not_AD	High_vs_Not_AD	Ast
MIR4500HG	Ast	-0.674919	2.04472	8.64514	0.00428219	High_vs_Not_AD	High_vs_Not_AD	Ast
GPC6	Ast	-1.09589	6.74474	15.1893	0.0002013	High_vs_Not_AD	High_vs_Not_AD	Ast
HS6ST3	Ast	-0.689249	5.95483	8.79434	0.00398423	High_vs_Not_AD	High_vs_Not_AD	Ast
AL161896.1	Ast	-0.798421	0.33451	4.0414	0.0472544	High_vs_Not_AD	High_vs_Not_AD	Ast
PCCA-AS1	Ast	-0.76631	1.74861	4.94988	0.0288767	High_vs_Not_AD	High_vs_Not_AD	Ast
AL356966.1	Ast	0.882041	0.859037	8.21031	0.00525108	High_vs_Not_AD	High_vs_Not_AD	Ast
FGF14-AS1	Ast	-1.13373	-0.183805	6.57512	0.0117453	High_vs_Not_AD	High_vs_Not_AD	Ast
LINC00551	Ast	0.874861	3.18584	11.0238	0.00135964	High_vs_Not_AD	High_vs_Not_AD	Ast
MYO16	Ast	-0.597739	3.94238	8.09336	0.00564503	High_vs_Not_AD	High_vs_Not_AD	Ast
GRTP1	Ast	0.554143	4.52419	9.89711	0.00232708	High_vs_Not_AD	High_vs_Not_AD	Ast
AL136221.1	Ast	0.77249	-0.0754524	7.47343	0.00736119	High_vs_Not_AD	High_vs_Not_AD	Ast
ADPRHL1	Ast	0.501865	2.70284	4.03781	0.0478885	High_vs_Not_AD	High_vs_Not_AD	Ast
POTEG	Ast	2.17128	1.37443	15.718	0.0001528	High_vs_Not_AD	High_vs_Not_AD	Ast
AL355075.4	Ast	1.50004	1.92403	9.43955	0.00290582	High_vs_Not_AD	High_vs_Not_AD	Ast
SLC7A8	Ast	-0.54616	2.72899	4.71108	0.0329535	High_vs_Not_AD	High_vs_Not_AD	Ast
RNF212B	Ast	-1.29014	2.79563	7.74686	0.0067162	High_vs_Not_AD	High_vs_Not_AD	Ast
LTB4R	Ast	-0.886963	0.720581	8.90229	0.00369028	High_vs_Not_AD	High_vs_Not_AD	Ast
NYNRIN	Ast	0.581245	1.982	6.85405	0.0105813	High_vs_Not_AD	High_vs_Not_AD	Ast
COCH	Ast	-0.563713	0.396309	5.72365	0.0187885	High_vs_Not_AD	High_vs_Not_AD	Ast
AL136298.1	Ast	-0.899536	2.23389	4.32423	0.040757	High_vs_Not_AD	High_vs_Not_AD	Ast
EGLN3	Ast	0.733975	8.4847	5.46893	0.0218607	High_vs_Not_AD	High_vs_Not_AD	Ast
SPTSSA	Ast	0.511377	3.5802	4.48365	0.0373414	High_vs_Not_AD	High_vs_Not_AD	Ast
NFKBIA	Ast	0.681454	4.85173	5.886	0.0175182	High_vs_Not_AD	High_vs_Not_AD	Ast
AL133304.3	Ast	-1.1477	5.20937	11.3873	0.00114401	High_vs_Not_AD	High_vs_Not_AD	Ast
LINC00609	Ast	-0.774829	8.37395	5.46113	0.021952	High_vs_Not_AD	High_vs_Not_AD	Ast
PTCSC3	Ast	-1.50276	4.2119	7.04908	0.00957396	High_vs_Not_AD	High_vs_Not_AD	Ast
AL162511.1	Ast	-0.838052	4.73362	6.22415	0.0146674	High_vs_Not_AD	High_vs_Not_AD	Ast
SFTA3	Ast	-1.21917	1.12392	7.61643	0.00707678	High_vs_Not_AD	High_vs_Not_AD	Ast
AL392023.2	Ast	-0.654738	0.602122	6.03157	0.0159954	High_vs_Not_AD	High_vs_Not_AD	Ast
LINC00871	Ast	0.991259	1.45337	10.0042	0.00219644	High_vs_Not_AD	High_vs_Not_AD	Ast
AL358335.2	Ast	0.909591	1.36059	6.36697	0.0135718	High_vs_Not_AD	High_vs_Not_AD	Ast
RPL36AL	Ast	-0.965286	3.23305	11.5982	0.00103738	High_vs_Not_AD	High_vs_Not_AD	Ast
POLE2	Ast	-0.576374	3.92171	5.20412	0.0252038	High_vs_Not_AD	High_vs_Not_AD	Ast
AL627171.2	Ast	1.34299	4.62531	10.5855	0.00167262	High_vs_Not_AD	High_vs_Not_AD	Ast
AL079307.1	Ast	-0.76319	0.855284	4.01492	0.0481818	High_vs_Not_AD	High_vs_Not_AD	Ast
LINC01500	Ast	0.542522	2.14431	7.33039	0.00829455	High_vs_Not_AD	High_vs_Not_AD	Ast
HSPA2	Ast	0.694791	3.53525	6.45593	0.0130015	High_vs_Not_AD	High_vs_Not_AD	Ast
AL157997.1	Ast	1.01148	0.670237	7.3774	0.00793595	High_vs_Not_AD	High_vs_Not_AD	Ast
SMOC1	Ast	-0.68827	4.22624	4.56544	0.0356903	High_vs_Not_AD	High_vs_Not_AD	Ast
SLC8A3	Ast	-0.735607	2.65533	5.31933	0.0236818	High_vs_Not_AD	High_vs_Not_AD	Ast
ADAM21	Ast	-1.06173	0.786516	6.84343	0.0104578	High_vs_Not_AD	High_vs_Not_AD	Ast
IRF2BPL	Ast	0.525624	3.25243	4.68043	0.0335096	High_vs_Not_AD	High_vs_Not_AD	Ast
NGB	Ast	1.04225	1.33997	8.90948	0.00372862	High_vs_Not_AD	High_vs_Not_AD	Ast
TSHR	Ast	-0.80752	4.34882	4.42841	0.0384964	High_vs_Not_AD	High_vs_Not_AD	Ast
LINC02301	Ast	-0.949378	1.27871	6.77362	0.0109518	High_vs_Not_AD	High_vs_Not_AD	Ast
FLRT2	Ast	0.677131	9.1257	5.50553	0.0214375	High_vs_Not_AD	High_vs_Not_AD	Ast
LINC02316	Ast	-0.711046	1.84437	5.01894	0.0278125	High_vs_Not_AD	High_vs_Not_AD	Ast
GPR68	Ast	-0.635567	-0.0715687	5.02919	0.0270995	High_vs_Not_AD	High_vs_Not_AD	Ast
SLC24A4	Ast	-0.788455	6.54113	8.42579	0.00478117	High_vs_Not_AD	High_vs_Not_AD	Ast
IFI27L2	Ast	-0.763081	3.61786	10.3309	0.00189027	High_vs_Not_AD	High_vs_Not_AD	Ast
AK7	Ast	0.665241	1.44929	8.04311	0.00575741	High_vs_Not_AD	High_vs_Not_AD	Ast
AL157912.1	Ast	-0.736646	0.324699	4.63917	0.0338291	High_vs_Not_AD	High_vs_Not_AD	Ast
SLC25A29	Ast	0.605088	6.96159	7.08757	0.00938415	High_vs_Not_AD	High_vs_Not_AD	Ast
MEG8	Ast	-0.535606	4.50495	4.45752	0.0378801	High_vs_Not_AD	High_vs_Not_AD	Ast
AL133367.1	Ast	0.516262	1.36366	4.56324	0.0356739	High_vs_Not_AD	High_vs_Not_AD	Ast
AL049840.6	Ast	0.558932	1.44648	6.93249	0.0101463	High_vs_Not_AD	High_vs_Not_AD	Ast
AL132712.1	Ast	0.874524	0.0118839	5.91067	0.0167971	High_vs_Not_AD	High_vs_Not_AD	Ast
INF2	Ast	0.533044	4.18102	7.66141	0.007012	High_vs_Not_AD	High_vs_Not_AD	Ast
AC124312.2	Ast	-0.997701	0.0828514	4.99418	0.0276834	High_vs_Not_AD	High_vs_Not_AD	Ast
APBA2	Ast	0.58766	7.16565	5.48201	0.0217085	High_vs_Not_AD	High_vs_Not_AD	Ast
AC026150.1	Ast	0.516068	0.519969	4.30601	0.0408723	High_vs_Not_AD	High_vs_Not_AD	Ast
LINC02352	Ast	0.640335	1.84121	6.6606	0.0116801	High_vs_Not_AD	High_vs_Not_AD	Ast
GREM1	Ast	1.55722	1.22767	14.7491	0.000238008	High_vs_Not_AD	High_vs_Not_AD	Ast
AC010809.3	Ast	-0.742895	1.71693	4.1525	0.0448335	High_vs_Not_AD	High_vs_Not_AD	Ast
NOP10	Ast	-0.577355	2.0949	5.4496	0.022091	High_vs_Not_AD	High_vs_Not_AD	Ast
NUTM1	Ast	1.37132	0.0526648	8.87518	0.00361729	High_vs_Not_AD	High_vs_Not_AD	Ast
AC021351.1	Ast	-0.718144	2.95916	4.39825	0.0391553	High_vs_Not_AD	High_vs_Not_AD	Ast
GPR176	Ast	0.694348	3.81207	7.93984	0.00609616	High_vs_Not_AD	High_vs_Not_AD	Ast
SRP14	Ast	-0.618779	5.30053	6.32911	0.0138842	High_vs_Not_AD	High_vs_Not_AD	Ast
CCDC9B	Ast	0.569718	2.52008	5.78596	0.0184777	High_vs_Not_AD	High_vs_Not_AD	Ast
KNL1	Ast	0.672242	0.759978	6.3368	0.0137018	High_vs_Not_AD	High_vs_Not_AD	Ast
EXD1	Ast	0.62622	0.22124	4.50098	0.036489	High_vs_Not_AD	High_vs_Not_AD	Ast
EHD4	Ast	0.520695	3.0304	9.85556	0.00237691	High_vs_Not_AD	High_vs_Not_AD	Ast
LCMT2	Ast	0.59054	1.3808	6.99325	0.00982295	High_vs_Not_AD	High_vs_Not_AD	Ast
STRC	Ast	-0.583256	1.55585	5.57791	0.0205939	High_vs_Not_AD	High_vs_Not_AD	Ast
SLC28A2	Ast	-1.36731	2.61791	7.09059	0.00936815	High_vs_Not_AD	High_vs_Not_AD	Ast
FGF7	Ast	-0.670729	0.89096	6.36924	0.0134815	High_vs_Not_AD	High_vs_Not_AD	Ast
AC020892.1	Ast	-0.706169	1.05676	4.26812	0.0418849	High_vs_Not_AD	High_vs_Not_AD	Ast
AC020892.2	Ast	-0.653135	2.35042	4.96057	0.0287484	High_vs_Not_AD	High_vs_Not_AD	Ast
AC090971.2	Ast	-0.839397	1.78867	8.70792	0.00414882	High_vs_Not_AD	High_vs_Not_AD	Ast
AC023906.4	Ast	-0.712176	0.115958	4.00611	0.0481082	High_vs_Not_AD	High_vs_Not_AD	Ast
PRTG	Ast	-0.689859	4.95393	6.96687	0.00998354	High_vs_Not_AD	High_vs_Not_AD	Ast
MNS1	Ast	-0.522217	3.19641	4.02274	0.048292	High_vs_Not_AD	High_vs_Not_AD	Ast
AC100839.2	Ast	-0.6995	0.0439428	4.17426	0.0437121	High_vs_Not_AD	High_vs_Not_AD	Ast
USP3-AS1	Ast	-0.601132	4.6736	5.31844	0.023698	High_vs_Not_AD	High_vs_Not_AD	Ast
AC100830.1	Ast	-0.827843	2.3494	7.84838	0.0063796	High_vs_Not_AD	High_vs_Not_AD	Ast
RBPMS2	Ast	0.923543	0.64746	6.29865	0.0139322	High_vs_Not_AD	High_vs_Not_AD	Ast
ZWILCH	Ast	-0.573486	1.79937	5.03972	0.0275156	High_vs_Not_AD	High_vs_Not_AD	Ast
AC012568.1	Ast	-0.813521	0.339575	4.616	0.034264	High_vs_Not_AD	High_vs_Not_AD	Ast
RPLP1	Ast	-0.954421	5.15215	18.0009	5.90752085642228e-05	High_vs_Not_AD	High_vs_Not_AD	Ast
AC009690.2	Ast	-0.72864	4.21156	4.08215	0.0466978	High_vs_Not_AD	High_vs_Not_AD	Ast
NPTN-IT1	Ast	0.597529	2.29647	9.547	0.00275976	High_vs_Not_AD	High_vs_Not_AD	Ast
AC090826.1	Ast	0.718215	-0.0149501	5.87721	0.0171311	High_vs_Not_AD	High_vs_Not_AD	Ast
SEMA7A	Ast	0.794053	1.54787	4.66642	0.0337309	High_vs_Not_AD	High_vs_Not_AD	Ast
LMAN1L	Ast	-1.36409	0.802814	8.04471	0.00557591	High_vs_Not_AD	High_vs_Not_AD	Ast
CPLX3	Ast	-0.783034	2.06206	4.27307	0.0419174	High_vs_Not_AD	High_vs_Not_AD	Ast
NRG4	Ast	-0.807534	2.60683	8.20193	0.00534762	High_vs_Not_AD	High_vs_Not_AD	Ast
TLNRD1	Ast	0.505635	0.806064	5.19653	0.0251272	High_vs_Not_AD	High_vs_Not_AD	Ast
STARD5	Ast	-0.791001	-0.263011	4.72399	0.0319459	High_vs_Not_AD	High_vs_Not_AD	Ast
RPS17	Ast	-0.739548	3.31247	14.8404	0.000235617	High_vs_Not_AD	High_vs_Not_AD	Ast
FSD2	Ast	-0.662203	2.41931	4.28892	0.0415935	High_vs_Not_AD	High_vs_Not_AD	Ast
AC022558.2	Ast	-0.640735	3.6736	4.277	0.0418796	High_vs_Not_AD	High_vs_Not_AD	Ast
RAMAC	Ast	0.534991	1.395	6.19639	0.0148544	High_vs_Not_AD	High_vs_Not_AD	Ast
AC024270.5	Ast	-0.621255	0.988075	5.87009	0.0175351	High_vs_Not_AD	High_vs_Not_AD	Ast
TM6SF1	Ast	-0.574122	0.946582	6.11949	0.0153649	High_vs_Not_AD	High_vs_Not_AD	Ast
ADAMTSL3	Ast	-0.909686	6.70242	7.10996	0.00927733	High_vs_Not_AD	High_vs_Not_AD	Ast
AC048382.6	Ast	0.652072	0.124582	4.51005	0.0362389	High_vs_Not_AD	High_vs_Not_AD	Ast
AGBL1	Ast	0.667245	5.91582	5.52122	0.021259	High_vs_Not_AD	High_vs_Not_AD	Ast
AC020687.1	Ast	0.602997	1.04152	5.18412	0.0253595	High_vs_Not_AD	High_vs_Not_AD	Ast
MFGE8	Ast	0.67047	6.01259	6.26887	0.0143273	High_vs_Not_AD	High_vs_Not_AD	Ast
WDR93	Ast	-0.53018	2.95356	4.41991	0.0386858	High_vs_Not_AD	High_vs_Not_AD	Ast
MESP1	Ast	-0.57244	1.1111	9.66158	0.00257151	High_vs_Not_AD	High_vs_Not_AD	Ast
SLCO3A1	Ast	-0.590664	5.88882	5.34762	0.0233281	High_vs_Not_AD	High_vs_Not_AD	Ast
LINC00924	Ast	0.690444	-0.0868721	4.66361	0.0331365	High_vs_Not_AD	High_vs_Not_AD	Ast
ARRDC4	Ast	-0.888659	4.30888	4.86648	0.0302623	High_vs_Not_AD	High_vs_Not_AD	Ast
TPSD1	Ast	1.15576	1.68905	4.61619	0.0346864	High_vs_Not_AD	High_vs_Not_AD	Ast
AC009065.4	Ast	0.574502	2.04947	7.33176	0.00828562	High_vs_Not_AD	High_vs_Not_AD	Ast
PRSS27	Ast	0.533053	0.802392	4.59531	0.0349089	High_vs_Not_AD	High_vs_Not_AD	Ast
ELOB	Ast	-0.670392	3.95445	10.0164	0.00219775	High_vs_Not_AD	High_vs_Not_AD	Ast
TNFRSF12A	Ast	1.4672	0.852064	6.11092	0.0153603	High_vs_Not_AD	High_vs_Not_AD	Ast
AC023830.3	Ast	0.72757	0.492473	8.53245	0.00441431	High_vs_Not_AD	High_vs_Not_AD	Ast
RPS15A	Ast	-0.716853	4.15491	15.035	0.000215783	High_vs_Not_AD	High_vs_Not_AD	Ast
AC027130.1	Ast	-0.786785	2.19778	7.28889	0.00846225	High_vs_Not_AD	High_vs_Not_AD	Ast
EEF2K	Ast	0.808049	7.19301	13.6843	0.00039574	High_vs_Not_AD	High_vs_Not_AD	Ast
AC008915.1	Ast	0.592228	0.140789	7.147	0.00882045	High_vs_Not_AD	High_vs_Not_AD	Ast
NPIPB9	Ast	1.06855	-0.0292576	7.44369	0.00750761	High_vs_Not_AD	High_vs_Not_AD	Ast
ATP2A1	Ast	-0.557001	2.16947	6.02668	0.0162675	High_vs_Not_AD	High_vs_Not_AD	Ast
AC109460.2	Ast	-0.627887	1.33142	4.65369	0.033912	High_vs_Not_AD	High_vs_Not_AD	Ast
NPIPB11	Ast	0.634428	2.39475	6.37431	0.0135671	High_vs_Not_AD	High_vs_Not_AD	Ast
TBX6	Ast	0.75773	2.82604	5.70011	0.0193392	High_vs_Not_AD	High_vs_Not_AD	Ast
SULT1A3	Ast	0.500608	2.20428	5.69268	0.0194169	High_vs_Not_AD	High_vs_Not_AD	Ast
MYLPF	Ast	0.928835	2.55423	6.89906	0.0103459	High_vs_Not_AD	High_vs_Not_AD	Ast
AC093249.2	Ast	0.508772	2.91193	7.90656	0.00620165	High_vs_Not_AD	High_vs_Not_AD	Ast
FBXL19-AS1	Ast	0.614589	1.10634	5.79423	0.0183185	High_vs_Not_AD	High_vs_Not_AD	Ast
ORC6	Ast	-0.708341	1.28124	8.12022	0.00552575	High_vs_Not_AD	High_vs_Not_AD	Ast
ABCC11	Ast	-0.624511	2.20903	7.54142	0.0074488	High_vs_Not_AD	High_vs_Not_AD	Ast
AC137494.1	Ast	-0.817673	4.32438	4.04123	0.0477841	High_vs_Not_AD	High_vs_Not_AD	Ast
AC026462.4	Ast	1.95985	0.494754	16.3756	0.000105552	High_vs_Not_AD	High_vs_Not_AD	Ast
AC007347.1	Ast	-0.792557	1.71729	4.25787	0.0422442	High_vs_Not_AD	High_vs_Not_AD	Ast
CRNDE	Ast	0.743631	0.145018	6.59375	0.0117556	High_vs_Not_AD	High_vs_Not_AD	Ast
CES1	Ast	-1.30285	-0.34209	8.11777	0.00518002	High_vs_Not_AD	High_vs_Not_AD	Ast
AC007495.1	Ast	-0.859165	2.61283	4.34729	0.0402587	High_vs_Not_AD	High_vs_Not_AD	Ast
AC009102.4	Ast	-0.72344	2.23905	5.29302	0.0240176	High_vs_Not_AD	High_vs_Not_AD	Ast
MT3	Ast	-0.833823	8.02525	9.2819	0.0031365	High_vs_Not_AD	High_vs_Not_AD	Ast
MT2A	Ast	-0.93118	8.34084	6.43063	0.0131687	High_vs_Not_AD	High_vs_Not_AD	Ast
AC009090.6	Ast	-0.736085	0.691981	4.76122	0.0317533	High_vs_Not_AD	High_vs_Not_AD	Ast
ADGRG3	Ast	-1.02195	-0.436963	8.14195	0.00511738	High_vs_Not_AD	High_vs_Not_AD	Ast
[truncated: 22,882 more rows]

## Sheet: Table_S2_legend
Supplemental Table S2: Supplemental_Table_S2.xlsx All significant differentially expressed genes (DEGs) detected across cell types throughout AD progression.
