# Supplementary material for: Cell type–specific gene regulatory atlas prioritizes drug targets and repurposable medicines in Alzheimer's disease
Source: HighWire-hosted journal article supplement (doi:10.1101/gr.280436.125), 2026-01-21
Supplement: Supplemental_Table_S3.xlsx [file Supplemental_Table_S3.xlsx]

## Sheet: Supplemental_Table_S3
Mic	Oli	Ast	OPC	Inh	Ext
EP300	100	0	30.7078	3.58186	0	98.8504
SP4	100	92.1066	49.4401	71.6878	0	0
SPIB	100	0	0	0	0	0
SPI1	100	0	0	0	0	0
SPIC	100	0	0	0	0	0
BCL11A	100	0	0	0	0	0
BCL11B	100	0	0	0	0	0
ELF5	100	0	0	0	0	0
ELF2	100	0	0	0	0	0
ELF1	100	0	0	0	0	0
ETV6	100	0	0	0	0	0
ETS2	100	0	0	0.0823829	0	0
IRF1	100	0	0	0	0	0
STAT2	100	0	0	0	0	0
EHF	100	0	0	0	0	0
ELF3	100	0	0	0	0	0
ELK4	100	0	0	0	0	0
ELF4	100	0	0	0	0	0
ETV7	100	0	0	0	0	0
IRF3	100	0	0	0	0	0
GABPA	100	0	0	0	0	0
CEBPB	100	0	0	0	0	0
ERF	100	0	0	0	0	0
ETV2	100	0	0	0	0	0
IRF4	100	0	0	0	0	10.7354
IRF9	100	0	0	0	0	0
IRF8	100	0	0	0	0	0
ERG	100	0	0	0	0	0
PRDM1	100	0	1.68902	0	0	0
ZNF683	100	0	0.338609	0	0	0
FEV	100	0	0	0	0	0
ENSG00000235187	100	0	0	0	0	0
FLI1	100	0	0	0	0	0
STAT6	100	0	1.69847	0.323773	0	0
CEBPG	100	0	0	0	0	0
ETS1	100	0	0	0	0	0
CEBPD	100	0	0	0	0	0
ELK3	100	0	0	0	0	0
ELK1	100	0	0	0	0	0
IRF2	100	0	0	0	0	0
CEBPE	100	0	0	0	0	0
CEBPA	100	0	0	0	0	0
RUNX1	100	0	0	0	0	0
NR2E1	100	13.0393	0	0	0	0
CBFB	100	0	0	0	0	0
ATF5	100	0	0	0	0	5.52944
RUNX2	100	0	0	0	0	0.25028
ENSG00000250096	100	0	0	0	0	0.25028
KLF2	100	29.2022	0	0	0	0
IRF5	100	0	0	0	0	0
ETV3	100	0	0	0	0	0
KLF7	100	58.8236	1.94578	5.04607	0	0
RUNX3	100	0	0	0	0	0
NR2C2	100	0	0	1.04117	0	0
ZSCAN10	100	0	0.573363	0.277624	0	1.51048
NR2C1	100	10.7342	61.7797	0	0	0
IRF6	100	0	0	0	0	0
SP6	100	78.3023	0	8.91525	0	0
SP5	100	78.3023	0	8.91525	0	0
ETV4	100	0	0	0	0	0
ETV1	100	0	0	0	0	0
NFKB2	100	2.17247	32.3047	26.2568	0	0
USF1	100	53.5151	26.4536	0	0	0
NFKB1	100	0	79.927	12.8736	0	0
IRF7	100	0	0	0	2.49461	0
USF2	100	49.0369	16.9548	0	0	0
RXRA	100	15.9183	47.8634	0	0	0
KLF1	100	22.8872	38.271	42.2868	0	36.9921
MITF	100	5.75238	0	0	18.7446	0
NR2F6	100	30.5722	54.3476	0	0	0
RARB	100	0	0	0	0	0
MYPOP	100	0	0	0	0	0
NR1I2	100	0	0	0	0	0
RXRG	100	22.4877	47.3278	0	0	0
RXRB	100	28.4066	64.6214	0	0	0
KLF14	100	86.0547	4.79936	41.1587	0	0
KLF11	100	86.0547	4.79936	41.1587	0	0
PITX2	100	0	0	0	0	0
TFEC	100	31.4958	0	0	19.7695	0
TFEB	100	46.0239	0	0	2.22409	0
ATF3	100	58.8174	0	0	0	0
NR1I3	100	0	17.5387	0	0	0
NR6A1	100	0	0	0	0	0
ETV5	100	0	0	0	0	0
TOPORS	100	0	0	0	0	0
NR1H3	100	19.692	49.4862	0	0	0
NR1H2	100	19.692	49.4862	0	0	0
ESRRG	100	0	84.2534	0	0	0
ZBTB3	100	0	0	0	0	0
TFE3	100	86.144	0	0	5.9448	0
ZNF524	100	0	0	4.27035	0	0
KLF4	96.6845	85.4161	53.7662	100	0	0
AL8445277	95.8417	91.1981	100	25.9629	0	0
AL6628245	95.8417	91.1981	100	25.9629	0	0
CR7597334	95.8417	91.1981	100	25.9629	0	0
CR3545653	95.8417	91.1981	100	25.9629	0	0
CR9368773	95.8417	91.1981	100	25.9629	0	0
ESRRA	94.9406	0	100	0	0	0
RARA	90.956	44.4405	100	0	0	0
REL	85.1936	0	100	22.0577	0	0
RELA	84.0491	0	100	19.9086	0	0
RARG	82.6318	1.22338	100	0	0	0
NR4A1	82.0231	13.3304	100	0	0	0
HIVEP2	79.0057	0	100	61.2173	0	0
NR2F1	71.7742	28.0674	100	0	0	0
ZNF219	68.4296	27.3103	5.21066	66.8336	0	100
NR2F2	64.0609	33.0154	100	1.94992	0	0
SP3	58.7704	77.242	26.4006	100	0	98.4773
PPARA	57.8424	0	100	0	0	0
HIVEP1	56.6431	0	100	5.03829	0	0
HIVEP3	56.6431	0	100	5.03829	0	0
TFAP2D	55.6872	35.3202	24.0735	100	0	0
NR4A3	52.7864	18.6729	100	0	0	0
RELB	47.3996	0	100	50.0924	0	0
MZF1	43.1746	8.75166	58.9869	100	0	2.57449
ZNF263	42.5565	1.58454	41.6252	100	0	46.5482
HNF4G	37.4825	26.7168	100	0.93758	0	0
SP8	35.8239	66.034	31.0795	100	0	66.7891
SP7	35.8239	66.034	31.0795	100	0	66.7891
SP9	35.8239	66.034	31.0795	100	0	66.7891
TFAP2E	32.9947	0	100	46.9082	0	0
GLIS1	30.9239	1.61753	31.0842	100	0	0
PPARD	30.0356	8.90973	100	0.717486	0	0
KLF5	30.0108	48.2416	55.9365	100	0	0
MYC	29.4557	22.8914	12.6582	100	0	0.262274
NR1H4	28.1087	21.0847	100	6.8263	0	0
HNF4A	27.1932	11.3556	100	2.99979	0	0
PLAG1	27.0254	27.7137	55.5433	100	0	0
STAT1	25.1388	0	100	0	0	0
MAFK	24.8136	0	2.21671	0	100	47.2232
MYB	22.884	7.13448	100	10.2485	0	0
SP2	22.4262	30.0058	55.2867	100	0	0.75831
NR5A1	21.9425	0	100	2.59771	0	0
MAFB	20.9203	0	0	0	100	2.12661
PURA	20.2267	23.053	58.559	100	0	7.95958
MAZ	19.0609	8.62504	40.7915	100	0	15.5292
THAP1	18.6952	0	100	53.2771	0	3.58745
NRL	18.4324	0	0	0	100	0
ESR2	18.138	25.6325	100	24.2706	0	0
ESR1	17.0967	14.1633	100	25.3393	0	0
SP1	16.305	39.4209	55.0764	100	0	0
INSM1	16.0538	17.193	92.3277	100	0	0
PRDM4	15.6225	0	100	32.5775	0	0
ZFY	15.0471	23.5099	100	65.4355	0	0
MAF	14.8273	0	1.27182	0	100	0
TFCP2	14.662	2.0447	100	62.8869	0	0
KLF16	12.1678	38.1572	33.6243	100	0	20.6174
TFAP2B	10.561	14.2537	81.1051	100	0	0
CIC	10.1163	0	0	0	100	0
ZNF148	9.53715	19.6515	51.8447	100	0	6.3624
TFAP2C	8.83452	3.16506	100	51.5509	0	0
TFAP2A	8.78618	9.41647	98.6135	100	0	0
ZNF350	8.75077	9.90647	100	86.3965	0	0
ZNF281	8.64379	12.0121	53.4736	100	0	44.1428
E2F4	8.00515	28.5624	12.9694	100	0	0
MAFG	7.8539	0	0	0	100	0
KLF6	7.47585	26.2989	21.9922	100	0	0
PATZ1	7.17483	29.1774	51.557	100	0	0
SPZ1	6.786	4.96571	72.9199	100	0	10.5811
NKX21	6.75576	0	100	0	0	0
E2F6	6.12353	16.0304	21.5301	100	0	9.94318
EBF1	5.70312	3.92965	100	62.9463	0	0
ZNF740	5.61715	34.6659	42.4778	100	0	36.0988
PLAGL1	4.65848	26.9754	65.7094	100	0	0
MBD2	4.56459	28.8973	17.3424	100	0	0
MECP2	4.5633	10.6443	22.599	100	0	0
ZBTB7A	4.17545	19.0786	28.5736	100	0	0
TFCP2L1	3.72831	2.65298	100	27.285	0	0
ZIC5	3.62589	19.0466	59.2918	100	0	0
NR5A2	3.49275	0	100	13.1704	0	0
RREB1	3.41187	24.4017	16.9009	29.0126	0	100
STAT3	3.24731	0	100	0	6.66756	4.43761
TP73	2.93169	0	100	17.126	0	0
KLF15	2.65832	23.296	44.6301	100	0	1.32185
ZFX	2.50405	25.17	92.7888	100	0	0
ZIC2	2.42668	0	4.83695	3.71035	0	100
MAFF	2.32913	0	0	0	100	37.4757
WT1	1.12585	24.9944	20.0683	100	0	57.1434
MAFA	1.08441	0	53.0812	100	80.7411	77.7847
SMAD5	1.03668	41.8639	1.56869	100	0	0
DNMT1	0.812327	26.2353	11.6061	100	0	0
GLIS2	0.740315	23.8237	40.9872	100	0	0
YBX1	0.459038	7.36123	100	25.9335	13.586	0
ARNT2	0.214687	0	3.37938	32.5757	0	100
NFIA	0.191834	0.0798053	100	48.8581	0	0
NFAT5	0	0	0	0	95.2942	100
NFATC2	0	0	0	0	100	95.5506
MEF2D	0	0	0	0	94.8507	100
NHLH1	0	6.4562	0	100	98.9029	0
LYL1	0	6.4562	0	100	98.9029	0
TCF12	0	4.93679	0	94.1944	100	0
POU6F2	0	0	94.682	0	100	0
NOBOX	0	0	100	0	92.3625	0
HOXD3	0	0	100	0	92.2925	0
TFAP4	0	9.82716	0	52.5648	100	0
MYOG	0	7.92202	0	79.5124	100	0
ASCL2	0	4.80033	0	69.8108	100	0
NHLH2	0	3.1458	0	47.9533	100	0
FOXP3	0	81.2484	10.1395	0	100	0
FOXD4L3	0	81.2484	10.1395	0	100	0
FOXD4L5	0	81.2484	10.1395	0	100	0
FOXD4L6	0	81.2484	10.1395	0	100	0
FOXD4L4	0	81.2484	10.1395	0	100	0
FOXD4L2	0	81.2484	10.1395	0	100	0
LHX4	0	0	66.4047	0	100	0
VSX2	0	0	82.3063	0	100	0
PDX1	0	0	77.6342	0	100	0
HOXD1	0	0	76.9915	0	100	0
MEOX1	0	0	81.671	0	100	0
LBX1	0	0	68.0838	0	100	0
EVX2	0	0	44.7663	0	100	0
BARHL1	0	0	69.9062	0	100	0
VAX2	0	0	55.4059	0	100	0
VAX1	0	0	55.4059	0	100	0
MEOX2	0	0	36.6033	0	100	0
EVX1	0	0	25.1876	0	100	0
HLTF	0	0	61.1906	7.42823	100	27.1499
ASCL1	0	1.91297	0	71.1511	100	1.59003
MSC	0	0	0	8.43394	100	4.32701
POU2F2	0	0	0	0	100	8.12458
POU5F1B	0	0	0	0	100	0
POU2F3	0	0	0	0	100	1.17512
ZNF238	0	9.31754	0	0	100	0
ZBTB42	0	9.31754	0	0	100	0
POU2F1	0	0	0	0	100	0
POU3F4	0	0	0	0	100	1.31003
DLX1	0	0	0.258616	0	100	0
MYF6	0	0	0	0	100	12.6339
FERD3L	0	0.906923	0	18.5832	100	69.7043
POU3F3	0	0	0	0	100	0
LHX8	0	0	0	0	100	0
AL7735441	0	0	0	0	100	0
CR3882292	0	0	0	0	100	0
AL6628334	0	0	0	0	100	0
CR7598154	0	0	0	0	100	0
BX0885802	0	0	0	0	100	0
CR8477943	0	0	0	0	100	0
DLX5	0	0	0	0	100	0
POU1F1	0	0	0	0	100	0
POU5F1	0	0	0	0	100	0
GFI1B	0	0	0	0	100	0
DLX6	0	0	25.1744	0	100	0
LHX6	0	0	0	0	100	0
ZNF333	0	0	0	0	100	0
GFI1	0	0	0	0	100	0
HDX	0	0	0	0	100	0
POU4F3	0	4.5694	0	0	100	0
POU4F2	0	0.670197	0	0	100	0
POU3F2	0	1.72486	0	0	100	0
POU4F1	0	3.07378	0	0	100	0
HOXB6	0	2.94492	0	0	100	0
DLX4	0	0	6.62199	0	100	0
TCF3	0	0	0	0	100	0
FOXE3	0	72.1481	4.98786	0	100	0
FOXD1	0	72.1481	4.98786	0	100	0
POU6F1	0	0	0	0	100	0
HOXB1	0	4.29313	0	0	100	15.6329
LBX2	0	0	2.83894	0	100	0
NFATC3	0	0	0	0	100	66.33
FEZF1	0	0	0	0	100	0
FEZF2	0	0	0	0	100	0
ENSG00000234254	0	4.51122	0	0	100	0
NEUROD1	0	4.75815	0	100	5.33608	96.634
RFX5	0	0	93.3181	0	2.37894	100
RBPJ	0	0	91.1056	0	0	100
EGR1	0	7.43443	0.5413	42.3952	0	100
RFX2	0	0	72.5338	0	0	100
RFX8	0	0	47.1225	0	0	100
RFX7	0	0	41.8454	0	0	100
RFX3	0	0	15.6376	0	0.438169	100
NR3C1	0	0	76.2143	67.2483	11.3641	100
RFX4	0	0	12.9076	0	0.178085	100
ARID2	0	0	45.1398	0	0	100
NR0B1	0	5.92941	7.12837	50.1084	0	100
MYOD1	0	0	0	50.8079	50.2846	100
TCF21	0	0	0	0	18.4965	100
ENSG00000187728	0	0	0	0	18.4965	100
TAL1	0	0	0	0	5.96815	100
TAL2	0	0	0	0	5.96815	100
TCF15	0	0	0	0	32.6891	100
SCXB	0	0	0	0	32.6891	100
SCXA	0	0	0	0	32.6891	100
LCOR	0	0	0	0	79.0656	100
JUNB	0	0	0	0	0	100
FOS	0	0	0	0	0	100
FOSL2	0	0	0	0	0	100
JUN	0	0	0	0	0	100
JUND	0	0	0	0	0	100
SMARCC1	0	0	0	0	0	100
FOSL1	0	0	0	0	0	100
BACH1	0	0	0	0	0	100
FOSB	0	0	0	0	0	100
JDP2	0	0	0	0	0	100
BACH2	0	0	0	0	0	100
EGR2	0	0	0	1.11696	0	100
BHLHA15	0	0	0	0	0	100
TCF23	0	0	0	0	0	100
NEUROD2	0	0	0	0	0	100
NEUROD4	0	0	0	0	0	100
NEUROD6	0	0	0	0	0	100
NEUROG1	0	0	0	0	0	100
OLIG1	0	0	0	0	0	100
BHLHE23	0	0	0	0	0	100
NEUROG3	0	0	0	0	0	100
ATOH7	0	0	0	0	0	100
OLIG3	0	0	0	0	0	100
EPAS1	0	0	0	0.147252	0	100
OLIG2	0	0	0	0	0	100
BHLHE22	0	0	0	0	0	100
NFE2	0	0	0	0	0.584551	100
NEUROG2	0	0	0	0	0	100
EGR4	0	0.982636	0	5.67296	0	100
EGR3	0	0	0	0.955166	0	100
EOMES	0	0	0	0	0	100
TBX10	0	0	0	0	0	100
TWIST2	0	0	0	0	0	100
BATF	0	0	0	0	0	100
TBR1	0	0	0	0	0	100
ATOH8	0	0	0	0	1.04779	100
TEF	0	0	0	0	4.67392	100
NFE2L2	0	0	0	0	3.43752	100
GLI3	0	0	0	0	0	100
NFIL3	0	0	0	0	6.93023	100
GLI2	0	0	0	0	0	100
MGA	0	0	0	0	0	100
MEF2C	0	0	0	0	8.62685	100
DBP	0	0	0	0	3.31831	100
TBX20	0	0	0	0	0	100
KLF3	0	0	0	0	0	100
PGR	0	0	13.5085	0	7.8477	100
ZSCAN4	0	0	0	0	15.8714	100
HLF	0	0	0	0	3.44701	100
ZNF75A	0	0	0	0	0	100
ZNF75D	0	0	0	0	0	100
ZNF75C	0	0	0	0	0	100
NR3C2	0	0	0	0	32.4975	100
TBX5	0	0	0	0	0	100
TBX4	0	0	0	0	0	100
ATOH1	0	0	0	1.5625	0	100
GLI1	0	0	20.7684	1.97719	0	100
KLF8	0	36.2759	21.8059	54.6638	0	100
ZNF354C	0	0	0	0	16.0367	100
MEF2A	0	0	0	0	68.8116	100
TEAD1	0	0	46.0451	0	9.42178	100
TEAD4	0	0	27.2818	0	21.3359	100
TBX21	0	0	0	0	0	100
CTCFL	0	100	2.78389	24.3882	0	0
CTCF	0	100	0	0.19784	0	0
SOX9	0	100	0	0	0	0
SOX12	0	100	0	0	0	0
SOX4	0	100	10.4064	13.5539	0	0
SOX13	0	100	0	0	0	0
SOX17	0	100	0	0	0.0731714	0
SOX11	0	100	0	0	0	0
SOX30	0	100	0	0	0	0
SRY	0	100	0	0	0	0
SOX3	0	100	0	0	0	0
SOX5	0	100	0	0	0	0
SOX6	0	100	0	0	0	0
TCF7	0	100	34.0857	14.1977	0	0
FOXK2	0	100	0	1.07099	4.6084	0
FOXP1	0	100	0	0.650319	3.9453	0
FOXP4	0	100	0	0.650319	3.9453	0
SOX2	0	100	0	0	0	0
SOX18	0	100	0	0	3.10278	0
SOX15	0	100	0	0	0	0
FOXD4	0	100	0	0	10.149	0
FOXD4L1	0	100	0	0	10.149	0
FOXJ1	0	100	0	0	10.149	0
FOXN3	0	100	0	0	2.95092	0
FOXN2	0	100	0	0	2.95092	0
FOXL2	0	100	0	0	2.95092	0
FOXK1	0	100	0	0	8.54144	0
KIAA0415	0	100	0	0	8.54144	0
FOXJ3	0	100	0	0	0	0
TCF7L2	0	100	36.855	14.5346	6.05295	0
SOX21	0	100	0	0	17.7377	0
FOXP2	0	100	14.821	3.29424	63.4472	0
SOX7	0	100	0	0	0.705272	0
SOX10	0	100	0	0	46.8502	0
CREM	0	100	0	0	0	0
ZIC4	0	67.3231	58.6688	100	0	0
ZFP161	0	30.5491	0	100	0	0
MYF5	0	6.37105	0	100	79.2987	0.360003
ZNF202	0	22.2449	51.3769	100	0	0
SMAD1	0	7.47573	26.3716	100	15.7495	14.9835
HES1	0	3.12098	47.182	100	0	0
AR	0	0	79.724	100	9.42563	83.0428
LMO2	0	4.75499	0	100	36.8403	0
SOHLH2	0	0	0	100	8.92612	0
C13orf38SOHLH2	0	0	0	100	8.92612	0
SMAD2	0	12.4107	49.0629	100	0	8.06297
HIF1A	0	0	0	100	0	23.8876
PTF1A	0	0	17.0502	100	76.9061	57.1756
ZBTB1	0	22.0159	0	100	0	0
NFIC	0	0	100	8.2903	3.96034	4.06975
NFIX	0	0.675752	100	48.4747	0	0
NFIB	0	0	100	48.3687	0	0
EN1	0	0	100	2.73872	34.325	0
GSX1	0	0	100	0	28.9952	0
GBX2	0	0	100	0	48.2685	0
PAX4	0	0	100	1.48173	28.357	0
NOTO	0	0	100	1.46159	37.5587	0
NKX11	0	0	100	0.491053	46.9781	0
ENSG00000229544	0	0	100	5.87475	59.0482	0
PRRX1	0	0	100	0.562565	17.5021	0
LHX9	0	0	100	0.562565	17.5021	0
PRRX2	0	0	100	0.562565	17.5021	0
SHOX2	0	0	100	0.562565	17.5021	0
RAX2	0	0	100	0.562565	17.5021	0
ISX	0	0	100	0.562565	17.5021	0
SHOX	0	0	100	0.562565	17.5021	0
GBX1	0	0	100	2.10685	54.88	0
NR1D2	0	0	100	0	6.58419	0
MIXL1	0	0	100	0.118227	13.8801	0
RORB	0	0	100	0	4.40545	0
LMX1A	0	0	100	2.3265	11.8789	0
TLX1	0	0	100	13.4323	3.64944	0.174175
TLX3	0	0	100	13.4323	3.64944	0.174175
HOXA1	0	0	100	0	44.8914	0
ESX1	0	0	100	2.0088	42.5809	0
BSX	0	0	100	0	14.6585	0
GSX2	0	0	100	0	18.1786	0
VSX1	0	0	100	0.42931	59.282	0
VTN	0	0	100	0	26.5171	0
LHX2	0	0	100	2.33004	48.5166	0
RORA	0	0	100	0	11.5706	0
HESX1	0	0	100	3.42848	44.0728	0
ALX3	0	0	100	0	54.4114	0
RFX6	0	0	100	0	0	8.75839
HLX	0	0	100	0	44.8321	0
AC0125311	0	0	100	0	44.8321	0
MSX2	0	0	100	0	26.7506	0
EMX1	0	0	100	2.57031	74.6446	0
ZFHX2	0	0	100	3.13418	7.95042	0
RAX	0	0	100	0	20.5374	0
EN2	0	0	100	1.24256	30.7588	0
HOXB3	0	0	100	0	49.2537	0
HOXA2	0	0	100	0	46.6247	0
REST	0	0.995327	100	70.0758	0	0
EMX2	0	0	100	0	84.77	0
HIC1	0	2.35974	100	35.5633	0	0
HOXB2	0	0	100	0	65.6861	0
ZFHX3	0	0	100	1.65358	59.6988	0
HOXB5	0	0	100	0	47.6058	0
MSX1	0	0	100	0	43.6159	0
HOXA4	0	0	100	6.64683	46.0312	0
NKX62	0	0	100	0	32.3369	0
OTP	0	0	100	1.06978	49.5364	0
MNX1	0	0	100	0	37.7907	0
LMX1B	0	0	100	0	28.0724	0
NKX63	0	0	100	0	85.889	0
VENTX	0	0	100	0	60.019	0
HOXA6	0	0	100	0	76.4394	0
TLX2	0	0	100	0	17.2527	0
UBP1	0	0	100	0	20.2233	24.9081
KLF12	0	14.6408	100	79.9179	0	44.1817
RORC	0	0	100	0	0	0
RFX1	0	0	100	0	0	26.9112
LHX5	0	1.48106	100	0	27.4659	0
LHX1	0	1.48106	100	0	27.4659	0
DLX3	0	0	100	0	32.8047	0
DLX2	0	0	100	0	32.8047	0
HOXC5	0	0.30875	100	3.77271	40.7283	0
HOXB4	0	1.17084	100	0.369463	52.7689	0
NR1D1	0	0	100	0	8.38152	0
NANOGP1	0	0	100	0	15.0294	0
HMX1	0	0	100	0	20.7589	0
LHX3	0	0	100	0	12.7824	0
FOXD3	0	58.4872	100	0	13.7617	0
HOXC9	0	0	100	0	51.7965	0
E2F8	0	0	100	17.6467	3.86407	4.04421
HMX3	0	0	100	0	70.8346	0
CTCFL	0	100	2.78389	24.3882	0	0
CTCF	0	100	0	0.19784	0	0
SOX9	0	100	0	0	0	0
SOX12	0	100	0	0	0	0
SOX4	0	100	10.4064	13.5539	0	0
SOX13	0	100	0	0	0	0
SOX17	0	100	0	0	0.0731714	0
SOX11	0	100	0	0	0	0
SOX30	0	100	0	0	0	0
SRY	0	100	0	0	0	0
SOX3	0	100	0	0	0	0
SOX5	0	100	0	0	0	0
SOX6	0	100	0	0	0	0
TCF7	0	100	34.0857	14.1977	0	0
FOXK2	0	100	0	1.07099	4.6084	0
FOXP1	0	100	0	0.650319	3.9453	0
FOXP4	0	100	0	0.650319	3.9453	0
SOX2	0	100	0	0	0	0
SOX18	0	100	0	0	3.10278	0
SOX15	0	100	0	0	0	0
FOXD4	0	100	0	0	10.149	0
FOXD4L1	0	100	0	0	10.149	0
FOXJ1	0	100	0	0	10.149	0
FOXN3	0	100	0	0	2.95092	0
FOXN2	0	100	0	0	2.95092	0
FOXL2	0	100	0	0	2.95092	0
FOXK1	0	100	0	0	8.54144	0
KIAA0415	0	100	0	0	8.54144	0
FOXJ3	0	100	0	0	0	0
TCF7L2	0	100	36.855	14.5346	6.05295	0
SOX21	0	100	0	0	17.7377	0
FOXP2	0	100	14.821	3.29424	63.4472	0
SOX7	0	100	0	0	0.705272	0
SOX10	0	100	0	0	46.8502	0
CREM	0	100	0	0	0	0
SP4	100	92.1066	49.4401	71.6878	0	0
AL8445277	95.8417	91.1981	100	25.9629	0	0
AL6628245	95.8417	91.1981	100	25.9629	0	0
CR7597334	95.8417	91.1981	100	25.9629	0	0
CR3545653	95.8417	91.1981	100	25.9629	0	0
CR9368773	95.8417	91.1981	100	25.9629	0	0
TFE3	100	86.144	0	0	5.9448	0
KLF14	100	86.0547	4.79936	41.1587	0	0
KLF11	100	86.0547	4.79936	41.1587	0	0
KLF4	96.6845	85.4161	53.7662	100	0	0
FOXP3	0	81.2484	10.1395	0	100	0
FOXD4L3	0	81.2484	10.1395	0	100	0
FOXD4L5	0	81.2484	10.1395	0	100	0
FOXD4L6	0	81.2484	10.1395	0	100	0
FOXD4L4	0	81.2484	10.1395	0	100	0
FOXD4L2	0	81.2484	10.1395	0	100	0
SP6	100	78.3023	0	8.91525	0	0
SP5	100	78.3023	0	8.91525	0	0
SP3	58.7704	77.242	26.4006	100	0	98.4773
FOXE3	0	72.1481	4.98786	0	100	0
FOXD1	0	72.1481	4.98786	0	100	0
ZIC4	0	67.3231	58.6688	100	0	0
SP8	35.8239	66.034	31.0795	100	0	66.7891
SP7	35.8239	66.034	31.0795	100	0	66.7891
SP9	35.8239	66.034	31.0795	100	0	66.7891
KLF7	100	58.8236	1.94578	5.04607	0	0
ATF3	100	58.8174	0	0	0	0
FOXD3	0	58.4872	100	0	13.7617	0
USF1	100	53.5151	26.4536	0	0	0
USF2	100	49.0369	16.9548	0	0	0
KLF5	30.0108	48.2416	55.9365	100	0	0
TFEB	100	46.0239	0	0	2.22409	0
RARA	90.956	44.4405	100	0	0	0
SMAD5	1.03668	41.8639	1.56869	100	0	0
SP1	16.305	39.4209	55.0764	100	0	0
KLF16	12.1678	38.1572	33.6243	100	0	20.6174
KLF8	0	36.2759	21.8059	54.6638	0	100
TFAP2D	55.6872	35.3202	24.0735	100	0	0
ZNF740	5.61715	34.6659	42.4778	100	0	36.0988
NR2F2	64.0609	33.0154	100	1.94992	0	0
TFEC	100	31.4958	0	0	19.7695	0
NR2F6	100	30.5722	54.3476	0	0	0
ZFP161	0	30.5491	0	100	0	0
SP2	22.4262	30.0058	55.2867	100	0	0.75831
KLF2	100	29.2022	0	0	0	0
PATZ1	7.17483	29.1774	51.557	100	0	0
MBD2	4.56459	28.8973	17.3424	100	0	0
E2F4	8.00515	28.5624	12.9694	100	0	0
RXRB	100	28.4066	64.6214	0	0	0
NR2F1	71.7742	28.0674	100	0	0	0
PLAG1	27.0254	27.7137	55.5433	100	0	0
ZNF219	68.4296	27.3103	5.21066	66.8336	0	100
PLAGL1	4.65848	26.9754	65.7094	100	0	0
HNF4G	37.4825	26.7168	100	0.93758	0	0
KLF6	7.47585	26.2989	21.9922	100	0	0
DNMT1	0.812327	26.2353	11.6061	100	0	0
ESR2	18.138	25.6325	100	24.2706	0	0
ZFX	2.50405	25.17	92.7888	100	0	0
WT1	1.12585	24.9944	20.0683	100	0	57.1434
RREB1	3.41187	24.4017	16.9009	29.0126	0	100
GLIS2	0.740315	23.8237	40.9872	100	0	0
ZFY	15.0471	23.5099	100	65.4355	0	0
KLF15	2.65832	23.296	44.6301	100	0	1.32185
PURA	20.2267	23.053	58.559	100	0	7.95958
MYC	29.4557	22.8914	12.6582	100	0	0.262274
KLF1	100	22.8872	38.271	42.2868	0	36.9921
RXRG	100	22.4877	47.3278	0	0	0
ZNF202	0	22.2449	51.3769	100	0	0
ZBTB1	0	22.0159	0	100	0	0
NR1H4	28.1087	21.0847	100	6.8263	0	0
NR1H3	100	19.692	49.4862	0	0	0
NR1H2	100	19.692	49.4862	0	0	0
ZNF148	9.53715	19.6515	51.8447	100	0	6.3624
ZBTB7A	4.17545	19.0786	28.5736	100	0	0
ZIC5	3.62589	19.0466	59.2918	100	0	0
NR4A3	52.7864	18.6729	100	0	0	0
INSM1	16.0538	17.193	92.3277	100	0	0
E2F6	6.12353	16.0304	21.5301	100	0	9.94318
RXRA	100	15.9183	47.8634	0	0	0
KLF12	0	14.6408	100	79.9179	0	44.1817
TFAP2B	10.561	14.2537	81.1051	100	0	0
ESR1	17.0967	14.1633	100	25.3393	0	0
NR4A1	82.0231	13.3304	100	0	0	0
NR2E1	100	13.0393	0	0	0	0
SMAD2	0	12.4107	49.0629	100	0	8.06297
ZNF281	8.64379	12.0121	53.4736	100	0	44.1428
HNF4A	27.1932	11.3556	100	2.99979	0	0
NR2C1	100	10.7342	61.7797	0	0	0
MECP2	4.5633	10.6443	22.599	100	0	0
ZNF350	8.75077	9.90647	100	86.3965	0	0
TFAP4	0	9.82716	0	52.5648	100	0
TFAP2A	8.78618	9.41647	98.6135	100	0	0
ZNF238	0	9.31754	0	0	100	0
ZBTB42	0	9.31754	0	0	100	0
PPARD	30.0356	8.90973	100	0.717486	0	0
MZF1	43.1746	8.75166	58.9869	100	0	2.57449
MAZ	19.0609	8.62504	40.7915	100	0	15.5292
MYOG	0	7.92202	0	79.5124	100	0
SMAD1	0	7.47573	26.3716	100	15.7495	14.9835
EGR1	0	7.43443	0.5413	42.3952	0	100
YBX1	0.459038	7.36123	100	25.9335	13.586	0
MYB	22.884	7.13448	100	10.2485	0	0
NHLH1	0	6.4562	0	100	98.9029	0
LYL1	0	6.4562	0	100	98.9029	0
MYF5	0	6.37105	0	100	79.2987	0.360003
NR0B1	0	5.92941	7.12837	50.1084	0	100
MITF	100	5.75238	0	0	18.7446	0
SPZ1	6.786	4.96571	72.9199	100	0	10.5811
TCF12	0	4.93679	0	94.1944	100	0
ASCL2	0	4.80033	0	69.8108	100	0
NEUROD1	0	4.75815	0	100	5.33608	96.634
LMO2	0	4.75499	0	100	36.8403	0
POU4F3	0	4.5694	0	0	100	0
ENSG00000234254	0	4.51122	0	0	100	0
HOXB1	0	4.29313	0	0	100	15.6329
EBF1	5.70312	3.92965	100	62.9463	0	0
TFAP2C	8.83452	3.16506	100	51.5509	0	0
NHLH2	0	3.1458	0	47.9533	100	0
HES1	0	3.12098	47.182	100	0	0
POU4F1	0	3.07378	0	0	100	0
HOXB6	0	2.94492	0	0	100	0
TFCP2L1	3.72831	2.65298	100	27.285	0	0
HIC1	0	2.35974	100	35.5633	0	0
NFKB2	100	2.17247	32.3047	26.2568	0	0
TFCP2	14.662	2.0447	100	62.8869	0	0
ASCL1	0	1.91297	0	71.1511	100	1.59003
POU3F2	0	1.72486	0	0	100	0
GLIS1	30.9239	1.61753	31.0842	100	0	0
ZNF263	42.5565	1.58454	41.6252	100	0	46.5482
LHX5	0	1.48106	100	0	27.4659	0
LHX1	0	1.48106	100	0	27.4659	0
RARG	82.6318	1.22338	100	0	0	0
HOXB4	0	1.17084	100	0.369463	52.7689	0
REST	0	0.995327	100	70.0758	0	0
EGR4	0	0.982636	0	5.67296	0	100
FERD3L	0	0.906923	0	18.5832	100	69.7043
NFIX	0	0.675752	100	48.4747	0	0
POU4F2	0	0.670197	0	0	100	0
HOXC5	0	0.30875	100	3.77271	40.7283	0
NFIA	0.191834	0.0798053	100	48.8581	0	0
NFAT5	0	0	0	0	95.2942	100
NFATC2	0	0	0	0	100	95.5506
MEF2D	0	0	0	0	94.8507	100
POU6F2	0	0	94.682	0	100	0
NOBOX	0	0	100	0	92.3625	0
HOXD3	0	0	100	0	92.2925	0
LHX4	0	0	66.4047	0	100	0
VSX2	0	0	82.3063	0	100	0
PDX1	0	0	77.6342	0	100	0
HOXD1	0	0	76.9915	0	100	0
MEOX1	0	0	81.671	0	100	0
LBX1	0	0	68.0838	0	100	0
EVX2	0	0	44.7663	0	100	0
BARHL1	0	0	69.9062	0	100	0
VAX2	0	0	55.4059	0	100	0
VAX1	0	0	55.4059	0	100	0
MEOX2	0	0	36.6033	0	100	0
EVX1	0	0	25.1876	0	100	0
HLTF	0	0	61.1906	7.42823	100	27.1499
MSC	0	0	0	8.43394	100	4.32701
POU2F2	0	0	0	0	100	8.12458
POU5F1B	0	0	0	0	100	0
POU2F3	0	0	0	0	100	1.17512
POU2F1	0	0	0	0	100	0
NRL	18.4324	0	0	0	100	0
POU3F4	0	0	0	0	100	1.31003
DLX1	0	0	0.258616	0	100	0
MAFG	7.8539	0	0	0	100	0
CIC	10.1163	0	0	0	100	0
MYF6	0	0	0	0	100	12.6339
POU3F3	0	0	0	0	100	0
LHX8	0	0	0	0	100	0
AL7735441	0	0	0	0	100	0
CR3882292	0	0	0	0	100	0
AL6628334	0	0	0	0	100	0
CR7598154	0	0	0	0	100	0
BX0885802	0	0	0	0	100	0
CR8477943	0	0	0	0	100	0
DLX5	0	0	0	0	100	0
MAFF	2.32913	0	0	0	100	37.4757
POU1F1	0	0	0	0	100	0
POU5F1	0	0	0	0	100	0
MAFK	24.8136	0	2.21671	0	100	47.2232
GFI1B	0	0	0	0	100	0
MAFB	20.9203	0	0	0	100	2.12661
DLX6	0	0	25.1744	0	100	0
LHX6	0	0	0	0	100	0
MAF	14.8273	0	1.27182	0	100	0
ZNF333	0	0	0	0	100	0
GFI1	0	0	0	0	100	0
HDX	0	0	0	0	100	0
DLX4	0	0	6.62199	0	100	0
TCF3	0	0	0	0	100	0
POU6F1	0	0	0	0	100	0
LBX2	0	0	2.83894	0	100	0
NFATC3	0	0	0	0	100	66.33
FEZF1	0	0	0	0	100	0
FEZF2	0	0	0	0	100	0
EP300	100	0	30.7078	3.58186	0	98.8504
RFX5	0	0	93.3181	0	2.37894	100
RBPJ	0	0	91.1056	0	0	100
RFX2	0	0	72.5338	0	0	100
RFX8	0	0	47.1225	0	0	100
RFX7	0	0	41.8454	0	0	100
RFX3	0	0	15.6376	0	0.438169	100
NR3C1	0	0	76.2143	67.2483	11.3641	100
RFX4	0	0	12.9076	0	0.178085	100
ARID2	0	0	45.1398	0	0	100
MYOD1	0	0	0	50.8079	50.2846	100
ARNT2	0.214687	0	3.37938	32.5757	0	100
TCF21	0	0	0	0	18.4965	100
ENSG00000187728	0	0	0	0	18.4965	100
TAL1	0	0	0	0	5.96815	100
TAL2	0	0	0	0	5.96815	100
TCF15	0	0	0	0	32.6891	100
SCXB	0	0	0	0	32.6891	100
SCXA	0	0	0	0	32.6891	100
LCOR	0	0	0	0	79.0656	100
JUNB	0	0	0	0	0	100
FOS	0	0	0	0	0	100
FOSL2	0	0	0	0	0	100
JUN	0	0	0	0	0	100
JUND	0	0	0	0	0	100
SMARCC1	0	0	0	0	0	100
FOSL1	0	0	0	0	0	100
BACH1	0	0	0	0	0	100
FOSB	0	0	0	0	0	100
JDP2	0	0	0	0	0	100
BACH2	0	0	0	0	0	100
EGR2	0	0	0	1.11696	0	100
BHLHA15	0	0	0	0	0	100
TCF23	0	0	0	0	0	100
NEUROD2	0	0	0	0	0	100
NEUROD4	0	0	0	0	0	100
NEUROD6	0	0	0	0	0	100
NEUROG1	0	0	0	0	0	100
OLIG1	0	0	0	0	0	100
BHLHE23	0	0	0	0	0	100
NEUROG3	0	0	0	0	0	100
ATOH7	0	0	0	0	0	100
OLIG3	0	0	0	0	0	100
EPAS1	0	0	0	0.147252	0	100
OLIG2	0	0	0	0	0	100
BHLHE22	0	0	0	0	0	100
NFE2	0	0	0	0	0.584551	100
NEUROG2	0	0	0	0	0	100
EGR3	0	0	0	0.955166	0	100
EOMES	0	0	0	0	0	100
TBX10	0	0	0	0	0	100
TWIST2	0	0	0	0	0	100
BATF	0	0	0	0	0	100
TBR1	0	0	0	0	0	100
ATOH8	0	0	0	0	1.04779	100
TEF	0	0	0	0	4.67392	100
NFE2L2	0	0	0	0	3.43752	100
GLI3	0	0	0	0	0	100
NFIL3	0	0	0	0	6.93023	100
GLI2	0	0	0	0	0	100
MGA	0	0	0	0	0	100
MEF2C	0	0	0	0	8.62685	100
DBP	0	0	0	0	3.31831	100
TBX20	0	0	0	0	0	100
KLF3	0	0	0	0	0	100
PGR	0	0	13.5085	0	7.8477	100
ZSCAN4	0	0	0	0	15.8714	100
HLF	0	0	0	0	3.44701	100
ZNF75A	0	0	0	0	0	100
ZNF75D	0	0	0	0	0	100
ZNF75C	0	0	0	0	0	100
NR3C2	0	0	0	0	32.4975	100
TBX5	0	0	0	0	0	100
TBX4	0	0	0	0	0	100
ATOH1	0	0	0	1.5625	0	100
GLI1	0	0	20.7684	1.97719	0	100
ZNF354C	0	0	0	0	16.0367	100
MEF2A	0	0	0	0	68.8116	100
TEAD1	0	0	46.0451	0	9.42178	100
ZIC2	2.42668	0	4.83695	3.71035	0	100
TEAD4	0	0	27.2818	0	21.3359	100
TBX21	0	0	0	0	0	100
AR	0	0	79.724	100	9.42563	83.0428
SOHLH2	0	0	0	100	8.92612	0
C13orf38SOHLH2	0	0	0	100	8.92612	0
HIF1A	0	0	0	100	0	23.8876
MAFA	1.08441	0	53.0812	100	80.7411	77.7847
PTF1A	0	0	17.0502	100	76.9061	57.1756
ESRRA	94.9406	0	100	0	0	0
SPIB	100	0	0	0	0	0
SPI1	100	0	0	0	0	0
SPIC	100	0	0	0	0	0
BCL11A	100	0	0	0	0	0
BCL11B	100	0	0	0	0	0
ELF5	100	0	0	0	0	0
ELF2	100	0	0	0	0	0
ELF1	100	0	0	0	0	0
ETV6	100	0	0	0	0	0
ETS2	100	0	0	0.0823829	0	0
IRF1	100	0	0	0	0	0
STAT2	100	0	0	0	0	0
EHF	100	0	0	0	0	0
ELF3	100	0	0	0	0	0
ELK4	100	0	0	0	0	0
ELF4	100	0	0	0	0	0
ETV7	100	0	0	0	0	0
IRF3	100	0	0	0	0	0
GABPA	100	0	0	0	0	0
CEBPB	100	0	0	0	0	0
ERF	100	0	0	0	0	0
ETV2	100	0	0	0	0	0
IRF4	100	0	0	0	0	10.7354
IRF9	100	0	0	0	0	0
IRF8	100	0	0	0	0	0
ERG	100	0	0	0	0	0
PRDM1	100	0	1.68902	0	0	0
ZNF683	100	0	0.338609	0	0	0
FEV	100	0	0	0	0	0
ENSG00000235187	100	0	0	0	0	0
FLI1	100	0	0	0	0	0
STAT6	100	0	1.69847	0.323773	0	0
CEBPG	100	0	0	0	0	0
ETS1	100	0	0	0	0	0
CEBPD	100	0	0	0	0	0
ELK3	100	0	0	0	0	0
ELK1	100	0	0	0	0	0
IRF2	100	0	0	0	0	0
CEBPE	100	0	0	0	0	0
CEBPA	100	0	0	0	0	0
RUNX1	100	0	0	0	0	0
CBFB	100	0	0	0	0	0
ATF5	100	0	0	0	0	5.52944
RUNX2	100	0	0	0	0	0.25028
ENSG00000250096	100	0	0	0	0	0.25028
IRF5	100	0	0	0	0	0
ETV3	100	0	0	0	0	0
RUNX3	100	0	0	0	0	0
NR2C2	100	0	0	1.04117	0	0
ZSCAN10	100	0	0.573363	0.277624	0	1.51048
IRF6	100	0	0	0	0	0
ETV4	100	0	0	0	0	0
ETV1	100	0	0	0	0	0
NFKB1	100	0	79.927	12.8736	0	0
IRF7	100	0	0	0	2.49461	0
RARB	100	0	0	0	0	0
MYPOP	100	0	0	0	0	0
NR1I2	100	0	0	0	0	0
PITX2	100	0	0	0	0	0
NR1I3	100	0	17.5387	0	0	0
NR6A1	100	0	0	0	0	0
ETV5	100	0	0	0	0	0
TOPORS	100	0	0	0	0	0
ESRRG	100	0	84.2534	0	0	0
ZBTB3	100	0	0	0	0	0
ZNF524	100	0	0	4.27035	0	0
RELA	84.0491	0	100	19.9086	0	0
REL	85.1936	0	100	22.0577	0	0
RELB	47.3996	0	100	50.0924	0	0
NFIC	0	0	100	8.2903	3.96034	4.06975
NFIB	0	0	100	48.3687	0	0
EN1	0	0	100	2.73872	34.325	0
GSX1	0	0	100	0	28.9952	0
GBX2	0	0	100	0	48.2685	0
PAX4	0	0	100	1.48173	28.357	0
NOTO	0	0	100	1.46159	37.5587	0
NKX11	0	0	100	0.491053	46.9781	0
ENSG00000229544	0	0	100	5.87475	59.0482	0
PRRX1	0	0	100	0.562565	17.5021	0
LHX9	0	0	100	0.562565	17.5021	0
PRRX2	0	0	100	0.562565	17.5021	0
SHOX2	0	0	100	0.562565	17.5021	0
RAX2	0	0	100	0.562565	17.5021	0
ISX	0	0	100	0.562565	17.5021	0
SHOX	0	0	100	0.562565	17.5021	0
GBX1	0	0	100	2.10685	54.88	0
NR1D2	0	0	100	0	6.58419	0
MIXL1	0	0	100	0.118227	13.8801	0
RORB	0	0	100	0	4.40545	0
LMX1A	0	0	100	2.3265	11.8789	0
TLX1	0	0	100	13.4323	3.64944	0.174175
TLX3	0	0	100	13.4323	3.64944	0.174175
HOXA1	0	0	100	0	44.8914	0
ESX1	0	0	100	2.0088	42.5809	0
BSX	0	0	100	0	14.6585	0
GSX2	0	0	100	0	18.1786	0
VSX1	0	0	100	0.42931	59.282	0
VTN	0	0	100	0	26.5171	0
LHX2	0	0	100	2.33004	48.5166	0
RORA	0	0	100	0	11.5706	0
HESX1	0	0	100	3.42848	44.0728	0
ALX3	0	0	100	0	54.4114	0
RFX6	0	0	100	0	0	8.75839
HLX	0	0	100	0	44.8321	0
AC0125311	0	0	100	0	44.8321	0
MSX2	0	0	100	0	26.7506	0
EMX1	0	0	100	2.57031	74.6446	0
ZFHX2	0	0	100	3.13418	7.95042	0
RAX	0	0	100	0	20.5374	0
EN2	0	0	100	1.24256	30.7588	0
HOXB3	0	0	100	0	49.2537	0
HOXA2	0	0	100	0	46.6247	0
EMX2	0	0	100	0	84.77	0
HOXB2	0	0	100	0	65.6861	0
NR5A2	3.49275	0	100	13.1704	0	0
ZFHX3	0	0	100	1.65358	59.6988	0
HOXB5	0	0	100	0	47.6058	0
MSX1	0	0	100	0	43.6159	0
NR5A1	21.9425	0	100	2.59771	0	0
HOXA4	0	0	100	6.64683	46.0312	0
NKX62	0	0	100	0	32.3369	0
STAT3	3.24731	0	100	0	6.66756	4.43761
OTP	0	0	100	1.06978	49.5364	0
MNX1	0	0	100	0	37.7907	0
LMX1B	0	0	100	0	28.0724	0
NKX63	0	0	100	0	85.889	0
VENTX	0	0	100	0	60.019	0
HOXA6	0	0	100	0	76.4394	0
TLX2	0	0	100	0	17.2527	0
UBP1	0	0	100	0	20.2233	24.9081
RORC	0	0	100	0	0	0
RFX1	0	0	100	0	0	26.9112
PRDM4	15.6225	0	100	32.5775	0	0
DLX3	0	0	100	0	32.8047	0
DLX2	0	0	100	0	32.8047	0
TFAP2E	32.9947	0	100	46.9082	0	0
STAT1	25.1388	0	100	0	0	0
THAP1	18.6952	0	100	53.2771	0	3.58745
PPARA	57.8424	0	100	0	0	0
HIVEP1	56.6431	0	100	5.03829	0	0
HIVEP3	56.6431	0	100	5.03829	0	0
NR1D1	0	0	100	0	8.38152	0
NANOGP1	0	0	100	0	15.0294	0
TP73	2.93169	0	100	17.126	0	0
HMX1	0	0	100	0	20.7589	0
HIVEP2	79.0057	0	100	61.2173	0	0
NKX21	6.75576	0	100	0	0	0
LHX3	0	0	100	0	12.7824	0
HOXC9	0	0	100	0	51.7965	0
E2F8	0	0	100	17.6467	3.86407	4.04421
HMX3	0	0	100	0	70.8346	0
NOBOX	0	0	100	0	92.3625	0
HOXD3	0	0	100	0	92.2925	0
AL8445277	95.8417	91.1981	100	25.9629	0	0
AL6628245	95.8417	91.1981	100	25.9629	0	0
CR7597334	95.8417	91.1981	100	25.9629	0	0
CR3545653	95.8417	91.1981	100	25.9629	0	0
CR9368773	95.8417	91.1981	100	25.9629	0	0
ESRRA	94.9406	0	100	0	0	0
RARA	90.956	44.4405	100	0	0	0
NR2F1	71.7742	28.0674	100	0	0	0
RELA	84.0491	0	100	19.9086	0	0
NR2F2	64.0609	33.0154	100	1.94992	0	0
ZFY	15.0471	23.5099	100	65.4355	0	0
NR4A1	82.0231	13.3304	100	0	0	0
HNF4A	27.1932	11.3556	100	2.99979	0	0
HNF4G	37.4825	26.7168	100	0.93758	0	0
REL	85.1936	0	100	22.0577	0	0
TFAP2C	8.83452	3.16506	100	51.5509	0	0
RARG	82.6318	1.22338	100	0	0	0
RELB	47.3996	0	100	50.0924	0	0
NR4A3	52.7864	18.6729	100	0	0	0
ESR2	18.138	25.6325	100	24.2706	0	0
NFIC	0	0	100	8.2903	3.96034	4.06975
NFIX	0	0.675752	100	48.4747	0	0
NFIA	0.191834	0.0798053	100	48.8581	0	0
NFIB	0	0	100	48.3687	0	0
EBF1	5.70312	3.92965	100	62.9463	0	0
EN1	0	0	100	2.73872	34.325	0
GSX1	0	0	100	0	28.9952	0
GBX2	0	0	100	0	48.2685	0
PAX4	0	0	100	1.48173	28.357	0
NOTO	0	0	100	1.46159	37.5587	0
NKX11	0	0	100	0.491053	46.9781	0
ENSG00000229544	0	0	100	5.87475	59.0482	0
PRRX1	0	0	100	0.562565	17.5021	0
LHX9	0	0	100	0.562565	17.5021	0
PRRX2	0	0	100	0.562565	17.5021	0
SHOX2	0	0	100	0.562565	17.5021	0
RAX2	0	0	100	0.562565	17.5021	0
ISX	0	0	100	0.562565	17.5021	0
SHOX	0	0	100	0.562565	17.5021	0
GBX1	0	0	100	2.10685	54.88	0
NR1D2	0	0	100	0	6.58419	0
MIXL1	0	0	100	0.118227	13.8801	0
RORB	0	0	100	0	4.40545	0
LMX1A	0	0	100	2.3265	11.8789	0
TLX1	0	0	100	13.4323	3.64944	0.174175
TLX3	0	0	100	13.4323	3.64944	0.174175
HOXA1	0	0	100	0	44.8914	0
ESX1	0	0	100	2.0088	42.5809	0
BSX	0	0	100	0	14.6585	0
GSX2	0	0	100	0	18.1786	0
ZNF350	8.75077	9.90647	100	86.3965	0	0
VSX1	0	0	100	0.42931	59.282	0
TFCP2L1	3.72831	2.65298	100	27.285	0	0
VTN	0	0	100	0	26.5171	0
LHX2	0	0	100	2.33004	48.5166	0
RORA	0	0	100	0	11.5706	0
HESX1	0	0	100	3.42848	44.0728	0
ALX3	0	0	100	0	54.4114	0
RFX6	0	0	100	0	0	8.75839
HLX	0	0	100	0	44.8321	0
AC0125311	0	0	100	0	44.8321	0
MSX2	0	0	100	0	26.7506	0
EMX1	0	0	100	2.57031	74.6446	0
ESR1	17.0967	14.1633	100	25.3393	0	0
ZFHX2	0	0	100	3.13418	7.95042	0
RAX	0	0	100	0	20.5374	0
EN2	0	0	100	1.24256	30.7588	0
HOXB3	0	0	100	0	49.2537	0
HOXA2	0	0	100	0	46.6247	0
REST	0	0.995327	100	70.0758	0	0
EMX2	0	0	100	0	84.77	0
HIC1	0	2.35974	100	35.5633	0	0
HOXB2	0	0	100	0	65.6861	0
NR5A2	3.49275	0	100	13.1704	0	0
ZFHX3	0	0	100	1.65358	59.6988	0
HOXB5	0	0	100	0	47.6058	0
MSX1	0	0	100	0	43.6159	0
NR5A1	21.9425	0	100	2.59771	0	0
HOXA4	0	0	100	6.64683	46.0312	0
NKX62	0	0	100	0	32.3369	0
TFCP2	14.662	2.0447	100	62.8869	0	0
PPARD	30.0356	8.90973	100	0.717486	0	0
STAT3	3.24731	0	100	0	6.66756	4.43761
NR1H4	28.1087	21.0847	100	6.8263	0	0
OTP	0	0	100	1.06978	49.5364	0
MNX1	0	0	100	0	37.7907	0
LMX1B	0	0	100	0	28.0724	0
NKX63	0	0	100	0	85.889	0
VENTX	0	0	100	0	60.019	0
HOXA6	0	0	100	0	76.4394	0
TLX2	0	0	100	0	17.2527	0
UBP1	0	0	100	0	20.2233	24.9081
KLF12	0	14.6408	100	79.9179	0	44.1817
RORC	0	0	100	0	0	0
RFX1	0	0	100	0	0	26.9112
LHX5	0	1.48106	100	0	27.4659	0
LHX1	0	1.48106	100	0	27.4659	0
PRDM4	15.6225	0	100	32.5775	0	0
DLX3	0	0	100	0	32.8047	0
DLX2	0	0	100	0	32.8047	0
TFAP2E	32.9947	0	100	46.9082	0	0
HOXC5	0	0.30875	100	3.77271	40.7283	0
STAT1	25.1388	0	100	0	0	0
THAP1	18.6952	0	100	53.2771	0	3.58745
PPARA	57.8424	0	100	0	0	0
HIVEP1	56.6431	0	100	5.03829	0	0
HIVEP3	56.6431	0	100	5.03829	0	0
HOXB4	0	1.17084	100	0.369463	52.7689	0
NR1D1	0	0	100	0	8.38152	0
NANOGP1	0	0	100	0	15.0294	0
MYB	22.884	7.13448	100	10.2485	0	0
TP73	2.93169	0	100	17.126	0	0
HMX1	0	0	100	0	20.7589	0
HIVEP2	79.0057	0	100	61.2173	0	0
NKX21	6.75576	0	100	0	0	0
YBX1	0.459038	7.36123	100	25.9335	13.586	0
LHX3	0	0	100	0	12.7824	0
FOXD3	0	58.4872	100	0	13.7617	0
HOXC9	0	0	100	0	51.7965	0
E2F8	0	0	100	17.6467	3.86407	4.04421
HMX3	0	0	100	0	70.8346	0
TFAP2A	8.78618	9.41647	98.6135	100	0	0
POU6F2	0	0	94.682	0	100	0
RFX5	0	0	93.3181	0	2.37894	100
ZFX	2.50405	25.17	92.7888	100	0	0
INSM1	16.0538	17.193	92.3277	100	0	0
RBPJ	0	0	91.1056	0	0	100
ESRRG	100	0	84.2534	0	0	0
VSX2	0	0	82.3063	0	100	0
MEOX1	0	0	81.671	0	100	0
TFAP2B	10.561	14.2537	81.1051	100	0	0
NFKB1	100	0	79.927	12.8736	0	0
AR	0	0	79.724	100	9.42563	83.0428
PDX1	0	0	77.6342	0	100	0
HOXD1	0	0	76.9915	0	100	0
NR3C1	0	0	76.2143	67.2483	11.3641	100
SPZ1	6.786	4.96571	72.9199	100	0	10.5811
RFX2	0	0	72.5338	0	0	100
BARHL1	0	0	69.9062	0	100	0
LBX1	0	0	68.0838	0	100	0
LHX4	0	0	66.4047	0	100	0
PLAGL1	4.65848	26.9754	65.7094	100	0	0
RXRB	100	28.4066	64.6214	0	0	0
NR2C1	100	10.7342	61.7797	0	0	0
HLTF	0	0	61.1906	7.42823	100	27.1499
ZIC5	3.62589	19.0466	59.2918	100	0	0
MZF1	43.1746	8.75166	58.9869	100	0	2.57449
ZIC4	0	67.3231	58.6688	100	0	0
PURA	20.2267	23.053	58.559	100	0	7.95958
KLF5	30.0108	48.2416	55.9365	100	0	0
PLAG1	27.0254	27.7137	55.5433	100	0	0
VAX2	0	0	55.4059	0	100	0
VAX1	0	0	55.4059	0	100	0
SP2	22.4262	30.0058	55.2867	100	0	0.75831
SP1	16.305	39.4209	55.0764	100	0	0
NR2F6	100	30.5722	54.3476	0	0	0
KLF4	96.6845	85.4161	53.7662	100	0	0
ZNF281	8.64379	12.0121	53.4736	100	0	44.1428
MAFA	1.08441	0	53.0812	100	80.7411	77.7847
ZNF148	9.53715	19.6515	51.8447	100	0	6.3624
PATZ1	7.17483	29.1774	51.557	100	0	0
ZNF202	0	22.2449	51.3769	100	0	0
NR1H3	100	19.692	49.4862	0	0	0
NR1H2	100	19.692	49.4862	0	0	0
SP4	100	92.1066	49.4401	71.6878	0	0
SMAD2	0	12.4107	49.0629	100	0	8.06297
RXRA	100	15.9183	47.8634	0	0	0
RXRG	100	22.4877	47.3278	0	0	0
HES1	0	3.12098	47.182	100	0	0
RFX8	0	0	47.1225	0	0	100
TEAD1	0	0	46.0451	0	9.42178	100
ARID2	0	0	45.1398	0	0	100
EVX2	0	0	44.7663	0	100	0
KLF15	2.65832	23.296	44.6301	100	0	1.32185
ZNF740	5.61715	34.6659	42.4778	100	0	36.0988
RFX7	0	0	41.8454	0	0	100
ZNF263	42.5565	1.58454	41.6252	100	0	46.5482
GLIS2	0.740315	23.8237	40.9872	100	0	0
MAZ	19.0609	8.62504	40.7915	100	0	15.5292
KLF1	100	22.8872	38.271	42.2868	0	36.9921
TCF7L2	0	100	36.855	14.5346	6.05295	0
MEOX2	0	0	36.6033	0	100	0
TCF7	0	100	34.0857	14.1977	0	0
KLF16	12.1678	38.1572	33.6243	100	0	20.6174
NFKB2	100	2.17247	32.3047	26.2568	0	0
GLIS1	30.9239	1.61753	31.0842	100	0	0
SP8	35.8239	66.034	31.0795	100	0	66.7891
SP7	35.8239	66.034	31.0795	100	0	66.7891
SP9	35.8239	66.034	31.0795	100	0	66.7891
EP300	100	0	30.7078	3.58186	0	98.8504
ZBTB7A	4.17545	19.0786	28.5736	100	0	0
TEAD4	0	0	27.2818	0	21.3359	100
USF1	100	53.5151	26.4536	0	0	0
SP3	58.7704	77.242	26.4006	100	0	98.4773
SMAD1	0	7.47573	26.3716	100	15.7495	14.9835
EVX1	0	0	25.1876	0	100	0
DLX6	0	0	25.1744	0	100	0
TFAP2D	55.6872	35.3202	24.0735	100	0	0
MECP2	4.5633	10.6443	22.599	100	0	0
KLF6	7.47585	26.2989	21.9922	100	0	0
KLF8	0	36.2759	21.8059	54.6638	0	100
E2F6	6.12353	16.0304	21.5301	100	0	9.94318
GLI1	0	0	20.7684	1.97719	0	100
WT1	1.12585	24.9944	20.0683	100	0	57.1434
NR1I3	100	0	17.5387	0	0	0
MBD2	4.56459	28.8973	17.3424	100	0	0
PTF1A	0	0	17.0502	100	76.9061	57.1756
USF2	100	49.0369	16.9548	0	0	0
RREB1	3.41187	24.4017	16.9009	29.0126	0	100
RFX3	0	0	15.6376	0	0.438169	100
FOXP2	0	100	14.821	3.29424	63.4472	0
PGR	0	0	13.5085	0	7.8477	100
E2F4	8.00515	28.5624	12.9694	100	0	0
RFX4	0	0	12.9076	0	0.178085	100
MYC	29.4557	22.8914	12.6582	100	0	0.262274
DNMT1	0.812327	26.2353	11.6061	100	0	0
SOX4	0	100	10.4064	13.5539	0	0
FOXP3	0	81.2484	10.1395	0	100	0
FOXD4L3	0	81.2484	10.1395	0	100	0
FOXD4L5	0	81.2484	10.1395	0	100	0
FOXD4L6	0	81.2484	10.1395	0	100	0
FOXD4L4	0	81.2484	10.1395	0	100	0
FOXD4L2	0	81.2484	10.1395	0	100	0
NR0B1	0	5.92941	7.12837	50.1084	0	100
DLX4	0	0	6.62199	0	100	0
ZNF219	68.4296	27.3103	5.21066	66.8336	0	100
FOXE3	0	72.1481	4.98786	0	100	0
FOXD1	0	72.1481	4.98786	0	100	0
ZIC2	2.42668	0	4.83695	3.71035	0	100
KLF14	100	86.0547	4.79936	41.1587	0	0
KLF11	100	86.0547	4.79936	41.1587	0	0
ARNT2	0.214687	0	3.37938	32.5757	0	100
LBX2	0	0	2.83894	0	100	0
CTCFL	0	100	2.78389	24.3882	0	0
MAFK	24.8136	0	2.21671	0	100	47.2232
KLF7	100	58.8236	1.94578	5.04607	0	0
STAT6	100	0	1.69847	0.323773	0	0
PRDM1	100	0	1.68902	0	0	0
SMAD5	1.03668	41.8639	1.56869	100	0	0
MAF	14.8273	0	1.27182	0	100	0
ZSCAN10	100	0	0.573363	0.277624	0	1.51048
EGR1	0	7.43443	0.5413	42.3952	0	100
ZNF683	100	0	0.338609	0	0	0
DLX1	0	0	0.258616	0	100	0
NFAT5	0	0	0	0	95.2942	100
NFATC2	0	0	0	0	100	95.5506
MEF2D	0	0	0	0	94.8507	100
NHLH1	0	6.4562	0	100	98.9029	0
LYL1	0	6.4562	0	100	98.9029	0
TCF12	0	4.93679	0	94.1944	100	0
TFAP4	0	9.82716	0	52.5648	100	0
MYOG	0	7.92202	0	79.5124	100	0
ASCL2	0	4.80033	0	69.8108	100	0
NHLH2	0	3.1458	0	47.9533	100	0
ASCL1	0	1.91297	0	71.1511	100	1.59003
MSC	0	0	0	8.43394	100	4.32701
POU2F2	0	0	0	0	100	8.12458
POU5F1B	0	0	0	0	100	0
POU2F3	0	0	0	0	100	1.17512
ZNF238	0	9.31754	0	0	100	0
ZBTB42	0	9.31754	0	0	100	0
POU2F1	0	0	0	0	100	0
NRL	18.4324	0	0	0	100	0
POU3F4	0	0	0	0	100	1.31003
MAFG	7.8539	0	0	0	100	0
CIC	10.1163	0	0	0	100	0
MYF6	0	0	0	0	100	12.6339
FERD3L	0	0.906923	0	18.5832	100	69.7043
POU3F3	0	0	0	0	100	0
LHX8	0	0	0	0	100	0
AL7735441	0	0	0	0	100	0
CR3882292	0	0	0	0	100	0
AL6628334	0	0	0	0	100	0
CR7598154	0	0	0	0	100	0
BX0885802	0	0	0	0	100	0
CR8477943	0	0	0	0	100	0
DLX5	0	0	0	0	100	0
MAFF	2.32913	0	0	0	100	37.4757
POU1F1	0	0	0	0	100	0
POU5F1	0	0	0	0	100	0
GFI1B	0	0	0	0	100	0
MAFB	20.9203	0	0	0	100	2.12661
LHX6	0	0	0	0	100	0
ZNF333	0	0	0	0	100	0
GFI1	0	0	0	0	100	0
HDX	0	0	0	0	100	0
POU4F3	0	4.5694	0	0	100	0
POU4F2	0	0.670197	0	0	100	0
POU3F2	0	1.72486	0	0	100	0
POU4F1	0	3.07378	0	0	100	0
HOXB6	0	2.94492	0	0	100	0
TCF3	0	0	0	0	100	0
POU6F1	0	0	0	0	100	0
HOXB1	0	4.29313	0	0	100	15.6329
NFATC3	0	0	0	0	100	66.33
FEZF1	0	0	0	0	100	0
FEZF2	0	0	0	0	100	0
ENSG00000234254	0	4.51122	0	0	100	0
NEUROD1	0	4.75815	0	100	5.33608	96.634
MYOD1	0	0	0	50.8079	50.2846	100
TCF21	0	0	0	0	18.4965	100
ENSG00000187728	0	0	0	0	18.4965	100
TAL1	0	0	0	0	5.96815	100
TAL2	0	0	0	0	5.96815	100
TCF15	0	0	0	0	32.6891	100
SCXB	0	0	0	0	32.6891	100
SCXA	0	0	0	0	32.6891	100
LCOR	0	0	0	0	79.0656	100
JUNB	0	0	0	0	0	100
FOS	0	0	0	0	0	100
FOSL2	0	0	0	0	0	100
JUN	0	0	0	0	0	100
JUND	0	0	0	0	0	100
SMARCC1	0	0	0	0	0	100
FOSL1	0	0	0	0	0	100
BACH1	0	0	0	0	0	100
FOSB	0	0	0	0	0	100
JDP2	0	0	0	0	0	100
BACH2	0	0	0	0	0	100
EGR2	0	0	0	1.11696	0	100
BHLHA15	0	0	0	0	0	100
TCF23	0	0	0	0	0	100
NEUROD2	0	0	0	0	0	100
NEUROD4	0	0	0	0	0	100
NEUROD6	0	0	0	0	0	100
NEUROG1	0	0	0	0	0	100
OLIG1	0	0	0	0	0	100
BHLHE23	0	0	0	0	0	100
NEUROG3	0	0	0	0	0	100
ATOH7	0	0	0	0	0	100
OLIG3	0	0	0	0	0	100
EPAS1	0	0	0	0.147252	0	100
OLIG2	0	0	0	0	0	100
BHLHE22	0	0	0	0	0	100
NFE2	0	0	0	0	0.584551	100
NEUROG2	0	0	0	0	0	100
EGR4	0	0.982636	0	5.67296	0	100
EGR3	0	0	0	0.955166	0	100
EOMES	0	0	0	0	0	100
TBX10	0	0	0	0	0	100
TWIST2	0	0	0	0	0	100
BATF	0	0	0	0	0	100
TBR1	0	0	0	0	0	100
ATOH8	0	0	0	0	1.04779	100
TEF	0	0	0	0	4.67392	100
NFE2L2	0	0	0	0	3.43752	100
GLI3	0	0	0	0	0	100
NFIL3	0	0	0	0	6.93023	100
GLI2	0	0	0	0	0	100
MGA	0	0	0	0	0	100
MEF2C	0	0	0	0	8.62685	100
DBP	0	0	0	0	3.31831	100
TBX20	0	0	0	0	0	100
KLF3	0	0	0	0	0	100
ZSCAN4	0	0	0	0	15.8714	100
HLF	0	0	0	0	3.44701	100
ZNF75A	0	0	0	0	0	100
ZNF75D	0	0	0	0	0	100
ZNF75C	0	0	0	0	0	100
NR3C2	0	0	0	0	32.4975	100
TBX5	0	0	0	0	0	100
TBX4	0	0	0	0	0	100
ATOH1	0	0	0	1.5625	0	100
ZNF354C	0	0	0	0	16.0367	100
MEF2A	0	0	0	0	68.8116	100
TBX21	0	0	0	0	0	100
CTCF	0	100	0	0.19784	0	0
SOX9	0	100	0	0	0	0
SOX12	0	100	0	0	0	0
SOX13	0	100	0	0	0	0
SOX17	0	100	0	0	0.0731714	0
SOX11	0	100	0	0	0	0
SOX30	0	100	0	0	0	0
SRY	0	100	0	0	0	0
SOX3	0	100	0	0	0	0
SOX5	0	100	0	0	0	0
SOX6	0	100	0	0	0	0
FOXK2	0	100	0	1.07099	4.6084	0
FOXP1	0	100	0	0.650319	3.9453	0
FOXP4	0	100	0	0.650319	3.9453	0
SOX2	0	100	0	0	0	0
SOX18	0	100	0	0	3.10278	0
SOX15	0	100	0	0	0	0
FOXD4	0	100	0	0	10.149	0
FOXD4L1	0	100	0	0	10.149	0
FOXJ1	0	100	0	0	10.149	0
FOXN3	0	100	0	0	2.95092	0
FOXN2	0	100	0	0	2.95092	0
FOXL2	0	100	0	0	2.95092	0
FOXK1	0	100	0	0	8.54144	0
KIAA0415	0	100	0	0	8.54144	0
FOXJ3	0	100	0	0	0	0
SOX21	0	100	0	0	17.7377	0
SOX7	0	100	0	0	0.705272	0
SOX10	0	100	0	0	46.8502	0
CREM	0	100	0	0	0	0
ZFP161	0	30.5491	0	100	0	0
MYF5	0	6.37105	0	100	79.2987	0.360003
LMO2	0	4.75499	0	100	36.8403	0
SOHLH2	0	0	0	100	8.92612	0
C13orf38SOHLH2	0	0	0	100	8.92612	0
HIF1A	0	0	0	100	0	23.8876
ZBTB1	0	22.0159	0	100	0	0
SPIB	100	0	0	0	0	0
SPI1	100	0	0	0	0	0
SPIC	100	0	0	0	0	0
BCL11A	100	0	0	0	0	0
BCL11B	100	0	0	0	0	0
ELF5	100	0	0	0	0	0
ELF2	100	0	0	0	0	0
ELF1	100	0	0	0	0	0
ETV6	100	0	0	0	0	0
ETS2	100	0	0	0.0823829	0	0
IRF1	100	0	0	0	0	0
STAT2	100	0	0	0	0	0
EHF	100	0	0	0	0	0
ELF3	100	0	0	0	0	0
ELK4	100	0	0	0	0	0
ELF4	100	0	0	0	0	0
ETV7	100	0	0	0	0	0
IRF3	100	0	0	0	0	0
GABPA	100	0	0	0	0	0
CEBPB	100	0	0	0	0	0
ERF	100	0	0	0	0	0
ETV2	100	0	0	0	0	0
IRF4	100	0	0	0	0	10.7354
IRF9	100	0	0	0	0	0
IRF8	100	0	0	0	0	0
ERG	100	0	0	0	0	0
FEV	100	0	0	0	0	0
ENSG00000235187	100	0	0	0	0	0
FLI1	100	0	0	0	0	0
CEBPG	100	0	0	0	0	0
ETS1	100	0	0	0	0	0
CEBPD	100	0	0	0	0	0
ELK3	100	0	0	0	0	0
ELK1	100	0	0	0	0	0
IRF2	100	0	0	0	0	0
CEBPE	100	0	0	0	0	0
CEBPA	100	0	0	0	0	0
RUNX1	100	0	0	0	0	0
NR2E1	100	13.0393	0	0	0	0
CBFB	100	0	0	0	0	0
ATF5	100	0	0	0	0	5.52944
RUNX2	100	0	0	0	0	0.25028
ENSG00000250096	100	0	0	0	0	0.25028
KLF2	100	29.2022	0	0	0	0
IRF5	100	0	0	0	0	0
ETV3	100	0	0	0	0	0
RUNX3	100	0	0	0	0	0
NR2C2	100	0	0	1.04117	0	0
IRF6	100	0	0	0	0	0
SP6	100	78.3023	0	8.91525	0	0
SP5	100	78.3023	0	8.91525	0	0
ETV4	100	0	0	0	0	0
ETV1	100	0	0	0	0	0
IRF7	100	0	0	0	2.49461	0
MITF	100	5.75238	0	0	18.7446	0
RARB	100	0	0	0	0	0
MYPOP	100	0	0	0	0	0
NR1I2	100	0	0	0	0	0
PITX2	100	0	0	0	0	0
TFEC	100	31.4958	0	0	19.7695	0
TFEB	100	46.0239	0	0	2.22409	0
ATF3	100	58.8174	0	0	0	0
NR6A1	100	0	0	0	0	0
ETV5	100	0	0	0	0	0
TOPORS	100	0	0	0	0	0
ZBTB3	100	0	0	0	0	0
TFE3	100	86.144	0	0	5.9448	0
ZNF524	100	0	0	4.27035	0	0
NHLH1	0	6.4562	0	100	98.9029	0
LYL1	0	6.4562	0	100	98.9029	0
SP3	58.7704	77.242	26.4006	100	0	98.4773
NEUROD1	0	4.75815	0	100	5.33608	96.634
KLF4	96.6845	85.4161	53.7662	100	0	0
INSM1	16.0538	17.193	92.3277	100	0	0
ZFX	2.50405	25.17	92.7888	100	0	0
TFAP2A	8.78618	9.41647	98.6135	100	0	0
ZNF263	42.5565	1.58454	41.6252	100	0	46.5482
TFAP2D	55.6872	35.3202	24.0735	100	0	0
KLF5	30.0108	48.2416	55.9365	100	0	0
MAZ	19.0609	8.62504	40.7915	100	0	15.5292
SP2	22.4262	30.0058	55.2867	100	0	0.75831
SP1	16.305	39.4209	55.0764	100	0	0
PLAG1	27.0254	27.7137	55.5433	100	0	0
ZNF148	9.53715	19.6515	51.8447	100	0	6.3624
PURA	20.2267	23.053	58.559	100	0	7.95958
PATZ1	7.17483	29.1774	51.557	100	0	0
KLF6	7.47585	26.2989	21.9922	100	0	0
ZBTB7A	4.17545	19.0786	28.5736	100	0	0
KLF16	12.1678	38.1572	33.6243	100	0	20.6174
SP8	35.8239	66.034	31.0795	100	0	66.7891
SP7	35.8239	66.034	31.0795	100	0	66.7891
SP9	35.8239	66.034	31.0795	100	0	66.7891
MZF1	43.1746	8.75166	58.9869	100	0	2.57449
SMAD5	1.03668	41.8639	1.56869	100	0	0
MBD2	4.56459	28.8973	17.3424	100	0	0
KLF15	2.65832	23.296	44.6301	100	0	1.32185
WT1	1.12585	24.9944	20.0683	100	0	57.1434
DNMT1	0.812327	26.2353	11.6061	100	0	0
PLAGL1	4.65848	26.9754	65.7094	100	0	0
ZNF740	5.61715	34.6659	42.4778	100	0	36.0988
ZIC4	0	67.3231	58.6688	100	0	0
E2F4	8.00515	28.5624	12.9694	100	0	0
ZIC5	3.62589	19.0466	59.2918	100	0	0
ZFP161	0	30.5491	0	100	0	0
MECP2	4.5633	10.6443	22.599	100	0	0
E2F6	6.12353	16.0304	21.5301	100	0	9.94318
GLIS2	0.740315	23.8237	40.9872	100	0	0
TFAP2B	10.561	14.2537	81.1051	100	0	0
ZNF281	8.64379	12.0121	53.4736	100	0	44.1428
MYF5	0	6.37105	0	100	79.2987	0.360003
SPZ1	6.786	4.96571	72.9199	100	0	10.5811
ZNF202	0	22.2449	51.3769	100	0	0
SMAD1	0	7.47573	26.3716	100	15.7495	14.9835
HES1	0	3.12098	47.182	100	0	0
AR	0	0	79.724	100	9.42563	83.0428
LMO2	0	4.75499	0	100	36.8403	0
SOHLH2	0	0	0	100	8.92612	0
C13orf38SOHLH2	0	0	0	100	8.92612	0
SMAD2	0	12.4107	49.0629	100	0	8.06297
HIF1A	0	0	0	100	0	23.8876
MAFA	1.08441	0	53.0812	100	80.7411	77.7847
PTF1A	0	0	17.0502	100	76.9061	57.1756
ZBTB1	0	22.0159	0	100	0	0
MYC	29.4557	22.8914	12.6582	100	0	0.262274
GLIS1	30.9239	1.61753	31.0842	100	0	0
TCF12	0	4.93679	0	94.1944	100	0
ZNF350	8.75077	9.90647	100	86.3965	0	0
KLF12	0	14.6408	100	79.9179	0	44.1817
MYOG	0	7.92202	0	79.5124	100	0
SP4	100	92.1066	49.4401	71.6878	0	0
ASCL1	0	1.91297	0	71.1511	100	1.59003
REST	0	0.995327	100	70.0758	0	0
ASCL2	0	4.80033	0	69.8108	100	0
NR3C1	0	0	76.2143	67.2483	11.3641	100
ZNF219	68.4296	27.3103	5.21066	66.8336	0	100
ZFY	15.0471	23.5099	100	65.4355	0	0
EBF1	5.70312	3.92965	100	62.9463	0	0
TFCP2	14.662	2.0447	100	62.8869	0	0
HIVEP2	79.0057	0	100	61.2173	0	0
KLF8	0	36.2759	21.8059	54.6638	0	100
THAP1	18.6952	0	100	53.2771	0	3.58745
TFAP4	0	9.82716	0	52.5648	100	0
TFAP2C	8.83452	3.16506	100	51.5509	0	0
MYOD1	0	0	0	50.8079	50.2846	100
NR0B1	0	5.92941	7.12837	50.1084	0	100
RELB	47.3996	0	100	50.0924	0	0
NFIA	0.191834	0.0798053	100	48.8581	0	0
NFIX	0	0.675752	100	48.4747	0	0
NFIB	0	0	100	48.3687	0	0
NHLH2	0	3.1458	0	47.9533	100	0
TFAP2E	32.9947	0	100	46.9082	0	0
EGR1	0	7.43443	0.5413	42.3952	0	100
KLF1	100	22.8872	38.271	42.2868	0	36.9921
KLF14	100	86.0547	4.79936	41.1587	0	0
KLF11	100	86.0547	4.79936	41.1587	0	0
HIC1	0	2.35974	100	35.5633	0	0
PRDM4	15.6225	0	100	32.5775	0	0
ARNT2	0.214687	0	3.37938	32.5757	0	100
RREB1	3.41187	24.4017	16.9009	29.0126	0	100
TFCP2L1	3.72831	2.65298	100	27.285	0	0
NFKB2	100	2.17247	32.3047	26.2568	0	0
AL8445277	95.8417	91.1981	100	25.9629	0	0
AL6628245	95.8417	91.1981	100	25.9629	0	0
CR7597334	95.8417	91.1981	100	25.9629	0	0
CR3545653	95.8417	91.1981	100	25.9629	0	0
CR9368773	95.8417	91.1981	100	25.9629	0	0
YBX1	0.459038	7.36123	100	25.9335	13.586	0
ESR1	17.0967	14.1633	100	25.3393	0	0
CTCFL	0	100	2.78389	24.3882	0	0
ESR2	18.138	25.6325	100	24.2706	0	0
REL	85.1936	0	100	22.0577	0	0
RELA	84.0491	0	100	19.9086	0	0
FERD3L	0	0.906923	0	18.5832	100	69.7043
E2F8	0	0	100	17.6467	3.86407	4.04421
TP73	2.93169	0	100	17.126	0	0
TCF7L2	0	100	36.855	14.5346	6.05295	0
TCF7	0	100	34.0857	14.1977	0	0
SOX4	0	100	10.4064	13.5539	0	0
TLX1	0	0	100	13.4323	3.64944	0.174175
TLX3	0	0	100	13.4323	3.64944	0.174175
NR5A2	3.49275	0	100	13.1704	0	0
NFKB1	100	0	79.927	12.8736	0	0
MYB	22.884	7.13448	100	10.2485	0	0
SP6	100	78.3023	0	8.91525	0	0
SP5	100	78.3023	0	8.91525	0	0
MSC	0	0	0	8.43394	100	4.32701
NFIC	0	0	100	8.2903	3.96034	4.06975
HLTF	0	0	61.1906	7.42823	100	27.1499
NR1H4	28.1087	21.0847	100	6.8263	0	0
HOXA4	0	0	100	6.64683	46.0312	0
ENSG00000229544	0	0	100	5.87475	59.0482	0
EGR4	0	0.982636	0	5.67296	0	100
KLF7	100	58.8236	1.94578	5.04607	0	0
HIVEP1	56.6431	0	100	5.03829	0	0
HIVEP3	56.6431	0	100	5.03829	0	0
ZNF524	100	0	0	4.27035	0	0
HOXC5	0	0.30875	100	3.77271	40.7283	0
ZIC2	2.42668	0	4.83695	3.71035	0	100
EP300	100	0	30.7078	3.58186	0	98.8504
HESX1	0	0	100	3.42848	44.0728	0
FOXP2	0	100	14.821	3.29424	63.4472	0
ZFHX2	0	0	100	3.13418	7.95042	0
HNF4A	27.1932	11.3556	100	2.99979	0	0
EN1	0	0	100	2.73872	34.325	0
NR5A1	21.9425	0	100	2.59771	0	0
EMX1	0	0	100	2.57031	74.6446	0
LHX2	0	0	100	2.33004	48.5166	0
LMX1A	0	0	100	2.3265	11.8789	0
GBX1	0	0	100	2.10685	54.88	0
ESX1	0	0	100	2.0088	42.5809	0
GLI1	0	0	20.7684	1.97719	0	100
NR2F2	64.0609	33.0154	100	1.94992	0	0
ZFHX3	0	0	100	1.65358	59.6988	0
ATOH1	0	0	0	1.5625	0	100
PAX4	0	0	100	1.48173	28.357	0
NOTO	0	0	100	1.46159	37.5587	0
EN2	0	0	100	1.24256	30.7588	0
EGR2	0	0	0	1.11696	0	100
FOXK2	0	100	0	1.07099	4.6084	0
OTP	0	0	100	1.06978	49.5364	0
NR2C2	100	0	0	1.04117	0	0
EGR3	0	0	0	0.955166	0	100
HNF4G	37.4825	26.7168	100	0.93758	0	0
PPARD	30.0356	8.90973	100	0.717486	0	0
FOXP1	0	100	0	0.650319	3.9453	0
FOXP4	0	100	0	0.650319	3.9453	0
PRRX1	0	0	100	0.562565	17.5021	0
LHX9	0	0	100	0.562565	17.5021	0
PRRX2	0	0	100	0.562565	17.5021	0
SHOX2	0	0	100	0.562565	17.5021	0
RAX2	0	0	100	0.562565	17.5021	0
ISX	0	0	100	0.562565	17.5021	0
SHOX	0	0	100	0.562565	17.5021	0
NKX11	0	0	100	0.491053	46.9781	0
VSX1	0	0	100	0.42931	59.282	0
HOXB4	0	1.17084	100	0.369463	52.7689	0
STAT6	100	0	1.69847	0.323773	0	0
ZSCAN10	100	0	0.573363	0.277624	0	1.51048
CTCF	0	100	0	0.19784	0	0
EPAS1	0	0	0	0.147252	0	100
MIXL1	0	0	100	0.118227	13.8801	0
ETS2	100	0	0	0.0823829	0	0
NFAT5	0	0	0	0	95.2942	100
NFATC2	0	0	0	0	100	95.5506
MEF2D	0	0	0	0	94.8507	100
POU6F2	0	0	94.682	0	100	0
NOBOX	0	0	100	0	92.3625	0
HOXD3	0	0	100	0	92.2925	0
FOXP3	0	81.2484	10.1395	0	100	0
FOXD4L3	0	81.2484	10.1395	0	100	0
FOXD4L5	0	81.2484	10.1395	0	100	0
FOXD4L6	0	81.2484	10.1395	0	100	0
FOXD4L4	0	81.2484	10.1395	0	100	0
FOXD4L2	0	81.2484	10.1395	0	100	0
LHX4	0	0	66.4047	0	100	0
VSX2	0	0	82.3063	0	100	0
PDX1	0	0	77.6342	0	100	0
HOXD1	0	0	76.9915	0	100	0
MEOX1	0	0	81.671	0	100	0
LBX1	0	0	68.0838	0	100	0
EVX2	0	0	44.7663	0	100	0
BARHL1	0	0	69.9062	0	100	0
VAX2	0	0	55.4059	0	100	0
VAX1	0	0	55.4059	0	100	0
MEOX2	0	0	36.6033	0	100	0
EVX1	0	0	25.1876	0	100	0
POU2F2	0	0	0	0	100	8.12458
POU5F1B	0	0	0	0	100	0
POU2F3	0	0	0	0	100	1.17512
ZNF238	0	9.31754	0	0	100	0
ZBTB42	0	9.31754	0	0	100	0
POU2F1	0	0	0	0	100	0
NRL	18.4324	0	0	0	100	0
POU3F4	0	0	0	0	100	1.31003
DLX1	0	0	0.258616	0	100	0
MAFG	7.8539	0	0	0	100	0
CIC	10.1163	0	0	0	100	0
MYF6	0	0	0	0	100	12.6339
POU3F3	0	0	0	0	100	0
LHX8	0	0	0	0	100	0
AL7735441	0	0	0	0	100	0
CR3882292	0	0	0	0	100	0
AL6628334	0	0	0	0	100	0
CR7598154	0	0	0	0	100	0
BX0885802	0	0	0	0	100	0
CR8477943	0	0	0	0	100	0
DLX5	0	0	0	0	100	0
MAFF	2.32913	0	0	0	100	37.4757
POU1F1	0	0	0	0	100	0
POU5F1	0	0	0	0	100	0
MAFK	24.8136	0	2.21671	0	100	47.2232
GFI1B	0	0	0	0	100	0
MAFB	20.9203	0	0	0	100	2.12661
DLX6	0	0	25.1744	0	100	0
LHX6	0	0	0	0	100	0
MAF	14.8273	0	1.27182	0	100	0
ZNF333	0	0	0	0	100	0
GFI1	0	0	0	0	100	0
HDX	0	0	0	0	100	0
POU4F3	0	4.5694	0	0	100	0
POU4F2	0	0.670197	0	0	100	0
POU3F2	0	1.72486	0	0	100	0
POU4F1	0	3.07378	0	0	100	0
HOXB6	0	2.94492	0	0	100	0
DLX4	0	0	6.62199	0	100	0
TCF3	0	0	0	0	100	0
FOXE3	0	72.1481	4.98786	0	100	0
FOXD1	0	72.1481	4.98786	0	100	0
POU6F1	0	0	0	0	100	0
HOXB1	0	4.29313	0	0	100	15.6329
LBX2	0	0	2.83894	0	100	0
NFATC3	0	0	0	0	100	66.33
FEZF1	0	0	0	0	100	0
FEZF2	0	0	0	0	100	0
ENSG00000234254	0	4.51122	0	0	100	0
RFX5	0	0	93.3181	0	2.37894	100
RBPJ	0	0	91.1056	0	0	100
RFX2	0	0	72.5338	0	0	100
RFX8	0	0	47.1225	0	0	100
RFX7	0	0	41.8454	0	0	100
RFX3	0	0	15.6376	0	0.438169	100
RFX4	0	0	12.9076	0	0.178085	100
ARID2	0	0	45.1398	0	0	100
TCF21	0	0	0	0	18.4965	100
ENSG00000187728	0	0	0	0	18.4965	100
TAL1	0	0	0	0	5.96815	100
TAL2	0	0	0	0	5.96815	100
TCF15	0	0	0	0	32.6891	100
SCXB	0	0	0	0	32.6891	100
SCXA	0	0	0	0	32.6891	100
LCOR	0	0	0	0	79.0656	100
JUNB	0	0	0	0	0	100
FOS	0	0	0	0	0	100
FOSL2	0	0	0	0	0	100
JUN	0	0	0	0	0	100
JUND	0	0	0	0	0	100
SMARCC1	0	0	0	0	0	100
FOSL1	0	0	0	0	0	100
BACH1	0	0	0	0	0	100
FOSB	0	0	0	0	0	100
JDP2	0	0	0	0	0	100
BACH2	0	0	0	0	0	100
BHLHA15	0	0	0	0	0	100
TCF23	0	0	0	0	0	100
NEUROD2	0	0	0	0	0	100
NEUROD4	0	0	0	0	0	100
NEUROD6	0	0	0	0	0	100
NEUROG1	0	0	0	0	0	100
OLIG1	0	0	0	0	0	100
BHLHE23	0	0	0	0	0	100
NEUROG3	0	0	0	0	0	100
ATOH7	0	0	0	0	0	100
OLIG3	0	0	0	0	0	100
OLIG2	0	0	0	0	0	100
BHLHE22	0	0	0	0	0	100
NFE2	0	0	0	0	0.584551	100
NEUROG2	0	0	0	0	0	100
EOMES	0	0	0	0	0	100
TBX10	0	0	0	0	0	100
TWIST2	0	0	0	0	0	100
BATF	0	0	0	0	0	100
TBR1	0	0	0	0	0	100
ATOH8	0	0	0	0	1.04779	100
TEF	0	0	0	0	4.67392	100
NFE2L2	0	0	0	0	3.43752	100
GLI3	0	0	0	0	0	100
NFIL3	0	0	0	0	6.93023	100
GLI2	0	0	0	0	0	100
MGA	0	0	0	0	0	100
MEF2C	0	0	0	0	8.62685	100
DBP	0	0	0	0	3.31831	100
TBX20	0	0	0	0	0	100
KLF3	0	0	0	0	0	100
PGR	0	0	13.5085	0	7.8477	100
ZSCAN4	0	0	0	0	15.8714	100
HLF	0	0	0	0	3.44701	100
ZNF75A	0	0	0	0	0	100
ZNF75D	0	0	0	0	0	100
ZNF75C	0	0	0	0	0	100
NR3C2	0	0	0	0	32.4975	100
TBX5	0	0	0	0	0	100
TBX4	0	0	0	0	0	100
ZNF354C	0	0	0	0	16.0367	100
MEF2A	0	0	0	0	68.8116	100
TEAD1	0	0	46.0451	0	9.42178	100
TEAD4	0	0	27.2818	0	21.3359	100
TBX21	0	0	0	0	0	100
SOX9	0	100	0	0	0	0
SOX12	0	100	0	0	0	0
SOX13	0	100	0	0	0	0
SOX17	0	100	0	0	0.0731714	0
SOX11	0	100	0	0	0	0
SOX30	0	100	0	0	0	0
SRY	0	100	0	0	0	0
SOX3	0	100	0	0	0	0
SOX5	0	100	0	0	0	0
SOX6	0	100	0	0	0	0
SOX2	0	100	0	0	0	0
SOX18	0	100	0	0	3.10278	0
SOX15	0	100	0	0	0	0
FOXD4	0	100	0	0	10.149	0
FOXD4L1	0	100	0	0	10.149	0
FOXJ1	0	100	0	0	10.149	0
FOXN3	0	100	0	0	2.95092	0
FOXN2	0	100	0	0	2.95092	0
FOXL2	0	100	0	0	2.95092	0
FOXK1	0	100	0	0	8.54144	0
KIAA0415	0	100	0	0	8.54144	0
FOXJ3	0	100	0	0	0	0
SOX21	0	100	0	0	17.7377	0
SOX7	0	100	0	0	0.705272	0
SOX10	0	100	0	0	46.8502	0
CREM	0	100	0	0	0	0
ESRRA	94.9406	0	100	0	0	0
RARA	90.956	44.4405	100	0	0	0
SPIB	100	0	0	0	0	0
SPI1	100	0	0	0	0	0
SPIC	100	0	0	0	0	0
BCL11A	100	0	0	0	0	0
BCL11B	100	0	0	0	0	0
ELF5	100	0	0	0	0	0
ELF2	100	0	0	0	0	0
ELF1	100	0	0	0	0	0
ETV6	100	0	0	0	0	0
IRF1	100	0	0	0	0	0
STAT2	100	0	0	0	0	0
EHF	100	0	0	0	0	0
ELF3	100	0	0	0	0	0
ELK4	100	0	0	0	0	0
ELF4	100	0	0	0	0	0
ETV7	100	0	0	0	0	0
IRF3	100	0	0	0	0	0
GABPA	100	0	0	0	0	0
CEBPB	100	0	0	0	0	0
ERF	100	0	0	0	0	0
ETV2	100	0	0	0	0	0
IRF4	100	0	0	0	0	10.7354
IRF9	100	0	0	0	0	0
IRF8	100	0	0	0	0	0
ERG	100	0	0	0	0	0
PRDM1	100	0	1.68902	0	0	0
ZNF683	100	0	0.338609	0	0	0
FEV	100	0	0	0	0	0
ENSG00000235187	100	0	0	0	0	0
FLI1	100	0	0	0	0	0
CEBPG	100	0	0	0	0	0
ETS1	100	0	0	0	0	0
CEBPD	100	0	0	0	0	0
ELK3	100	0	0	0	0	0
ELK1	100	0	0	0	0	0
IRF2	100	0	0	0	0	0
CEBPE	100	0	0	0	0	0
CEBPA	100	0	0	0	0	0
RUNX1	100	0	0	0	0	0
NR2E1	100	13.0393	0	0	0	0
CBFB	100	0	0	0	0	0
ATF5	100	0	0	0	0	5.52944
RUNX2	100	0	0	0	0	0.25028
ENSG00000250096	100	0	0	0	0	0.25028
KLF2	100	29.2022	0	0	0	0
IRF5	100	0	0	0	0	0
ETV3	100	0	0	0	0	0
RUNX3	100	0	0	0	0	0
NR2C1	100	10.7342	61.7797	0	0	0
IRF6	100	0	0	0	0	0
ETV4	100	0	0	0	0	0
ETV1	100	0	0	0	0	0
USF1	100	53.5151	26.4536	0	0	0
IRF7	100	0	0	0	2.49461	0
USF2	100	49.0369	16.9548	0	0	0
RXRA	100	15.9183	47.8634	0	0	0
MITF	100	5.75238	0	0	18.7446	0
NR2F6	100	30.5722	54.3476	0	0	0
RARB	100	0	0	0	0	0
MYPOP	100	0	0	0	0	0
NR1I2	100	0	0	0	0	0
RXRG	100	22.4877	47.3278	0	0	0
RXRB	100	28.4066	64.6214	0	0	0
PITX2	100	0	0	0	0	0
TFEC	100	31.4958	0	0	19.7695	0
TFEB	100	46.0239	0	0	2.22409	0
ATF3	100	58.8174	0	0	0	0
NR1I3	100	0	17.5387	0	0	0
NR6A1	100	0	0	0	0	0
ETV5	100	0	0	0	0	0
TOPORS	100	0	0	0	0	0
NR1H3	100	19.692	49.4862	0	0	0
NR1H2	100	19.692	49.4862	0	0	0
ESRRG	100	0	84.2534	0	0	0
ZBTB3	100	0	0	0	0	0
TFE3	100	86.144	0	0	5.9448	0
NR2F1	71.7742	28.0674	100	0	0	0
NR4A1	82.0231	13.3304	100	0	0	0
RARG	82.6318	1.22338	100	0	0	0
NR4A3	52.7864	18.6729	100	0	0	0
GSX1	0	0	100	0	28.9952	0
GBX2	0	0	100	0	48.2685	0
NR1D2	0	0	100	0	6.58419	0
RORB	0	0	100	0	4.40545	0
HOXA1	0	0	100	0	44.8914	0
BSX	0	0	100	0	14.6585	0
GSX2	0	0	100	0	18.1786	0
VTN	0	0	100	0	26.5171	0
RORA	0	0	100	0	11.5706	0
ALX3	0	0	100	0	54.4114	0
RFX6	0	0	100	0	0	8.75839
HLX	0	0	100	0	44.8321	0
AC0125311	0	0	100	0	44.8321	0
MSX2	0	0	100	0	26.7506	0
RAX	0	0	100	0	20.5374	0
HOXB3	0	0	100	0	49.2537	0
HOXA2	0	0	100	0	46.6247	0
EMX2	0	0	100	0	84.77	0
HOXB2	0	0	100	0	65.6861	0
HOXB5	0	0	100	0	47.6058	0
MSX1	0	0	100	0	43.6159	0
NKX62	0	0	100	0	32.3369	0
STAT3	3.24731	0	100	0	6.66756	4.43761
MNX1	0	0	100	0	37.7907	0
LMX1B	0	0	100	0	28.0724	0
NKX63	0	0	100	0	85.889	0
VENTX	0	0	100	0	60.019	0
HOXA6	0	0	100	0	76.4394	0
TLX2	0	0	100	0	17.2527	0
UBP1	0	0	100	0	20.2233	24.9081
RORC	0	0	100	0	0	0
RFX1	0	0	100	0	0	26.9112
LHX5	0	1.48106	100	0	27.4659	0
LHX1	0	1.48106	100	0	27.4659	0
DLX3	0	0	100	0	32.8047	0
DLX2	0	0	100	0	32.8047	0
STAT1	25.1388	0	100	0	0	0
PPARA	57.8424	0	100	0	0	0
NR1D1	0	0	100	0	8.38152	0
NANOGP1	0	0	100	0	15.0294	0
HMX1	0	0	100	0	20.7589	0
NKX21	6.75576	0	100	0	0	0
LHX3	0	0	100	0	12.7824	0
FOXD3	0	58.4872	100	0	13.7617	0
HOXC9	0	0	100	0	51.7965	0
HMX3	0	0	100	0	70.8346	0
NFATC2	0	0	0	0	100	95.5506
TCF12	0	4.93679	0	94.1944	100	0
POU6F2	0	0	94.682	0	100	0
TFAP4	0	9.82716	0	52.5648	100	0
MYOG	0	7.92202	0	79.5124	100	0
ASCL2	0	4.80033	0	69.8108	100	0
NHLH2	0	3.1458	0	47.9533	100	0
FOXP3	0	81.2484	10.1395	0	100	0
FOXD4L3	0	81.2484	10.1395	0	100	0
FOXD4L5	0	81.2484	10.1395	0	100	0
FOXD4L6	0	81.2484	10.1395	0	100	0
FOXD4L4	0	81.2484	10.1395	0	100	0
FOXD4L2	0	81.2484	10.1395	0	100	0
LHX4	0	0	66.4047	0	100	0
VSX2	0	0	82.3063	0	100	0
PDX1	0	0	77.6342	0	100	0
HOXD1	0	0	76.9915	0	100	0
MEOX1	0	0	81.671	0	100	0
LBX1	0	0	68.0838	0	100	0
EVX2	0	0	44.7663	0	100	0
BARHL1	0	0	69.9062	0	100	0
VAX2	0	0	55.4059	0	100	0
VAX1	0	0	55.4059	0	100	0
MEOX2	0	0	36.6033	0	100	0
EVX1	0	0	25.1876	0	100	0
HLTF	0	0	61.1906	7.42823	100	27.1499
ASCL1	0	1.91297	0	71.1511	100	1.59003
MSC	0	0	0	8.43394	100	4.32701
POU2F2	0	0	0	0	100	8.12458
POU5F1B	0	0	0	0	100	0
POU2F3	0	0	0	0	100	1.17512
ZNF238	0	9.31754	0	0	100	0
ZBTB42	0	9.31754	0	0	100	0
POU2F1	0	0	0	0	100	0
NRL	18.4324	0	0	0	100	0
POU3F4	0	0	0	0	100	1.31003
DLX1	0	0	0.258616	0	100	0
MAFG	7.8539	0	0	0	100	0
CIC	10.1163	0	0	0	100	0
MYF6	0	0	0	0	100	12.6339
FERD3L	0	0.906923	0	18.5832	100	69.7043
POU3F3	0	0	0	0	100	0
LHX8	0	0	0	0	100	0
AL7735441	0	0	0	0	100	0
CR3882292	0	0	0	0	100	0
AL6628334	0	0	0	0	100	0
CR7598154	0	0	0	0	100	0
BX0885802	0	0	0	0	100	0
CR8477943	0	0	0	0	100	0
DLX5	0	0	0	0	100	0
MAFF	2.32913	0	0	0	100	37.4757
POU1F1	0	0	0	0	100	0
POU5F1	0	0	0	0	100	0
MAFK	24.8136	0	2.21671	0	100	47.2232
GFI1B	0	0	0	0	100	0
MAFB	20.9203	0	0	0	100	2.12661
DLX6	0	0	25.1744	0	100	0
LHX6	0	0	0	0	100	0
MAF	14.8273	0	1.27182	0	100	0
ZNF333	0	0	0	0	100	0
GFI1	0	0	0	0	100	0
HDX	0	0	0	0	100	0
POU4F3	0	4.5694	0	0	100	0
POU4F2	0	0.670197	0	0	100	0
POU3F2	0	1.72486	0	0	100	0
POU4F1	0	3.07378	0	0	100	0
HOXB6	0	2.94492	0	0	100	0
DLX4	0	0	6.62199	0	100	0
TCF3	0	0	0	0	100	0
FOXE3	0	72.1481	4.98786	0	100	0
FOXD1	0	72.1481	4.98786	0	100	0
POU6F1	0	0	0	0	100	0
HOXB1	0	4.29313	0	0	100	15.6329
LBX2	0	0	2.83894	0	100	0
NFATC3	0	0	0	0	100	66.33
FEZF1	0	0	0	0	100	0
FEZF2	0	0	0	0	100	0
ENSG00000234254	0	4.51122	0	0	100	0
NHLH1	0	6.4562	0	100	98.9029	0
LYL1	0	6.4562	0	100	98.9029	0
NFAT5	0	0	0	0	95.2942	100
MEF2D	0	0	0	0	94.8507	100
NOBOX	0	0	100	0	92.3625	0
HOXD3	0	0	100	0	92.2925	0
NKX63	0	0	100	0	85.889	0
EMX2	0	0	100	0	84.77	0
MAFA	1.08441	0	53.0812	100	80.7411	77.7847
MYF5	0	6.37105	0	100	79.2987	0.360003
LCOR	0	0	0	0	79.0656	100
PTF1A	0	0	17.0502	100	76.9061	57.1756
HOXA6	0	0	100	0	76.4394	0
EMX1	0	0	100	2.57031	74.6446	0
HMX3	0	0	100	0	70.8346	0
MEF2A	0	0	0	0	68.8116	100
HOXB2	0	0	100	0	65.6861	0
FOXP2	0	100	14.821	3.29424	63.4472	0
VENTX	0	0	100	0	60.019	0
ZFHX3	0	0	100	1.65358	59.6988	0
VSX1	0	0	100	0.42931	59.282	0
ENSG00000229544	0	0	100	5.87475	59.0482	0
GBX1	0	0	100	2.10685	54.88	0
ALX3	0	0	100	0	54.4114	0
HOXB4	0	1.17084	100	0.369463	52.7689	0
HOXC9	0	0	100	0	51.7965	0
MYOD1	0	0	0	50.8079	50.2846	100
OTP	0	0	100	1.06978	49.5364	0
HOXB3	0	0	100	0	49.2537	0
[truncated: 839 more rows]

## Sheet: Table_S3_legend
Supplemental Table S3: Supplemental_Table_S3.xlsx Summary of transcription factor motif enrichment scores identified within significant marker peaks for each cell type.
