# Supplementary material for: Cell type–specific gene regulatory atlas prioritizes drug targets and repurposable medicines in Alzheimer's disease
Source: HighWire-hosted journal article supplement (doi:10.1101/gr.280436.125), 2026-01-21
Supplement: Supplemental_Table_S4.xlsx [file Supplemental_Table_S4.xlsx]

## Sheet: Supplemental_Table_S4
GeneIntegrationMatrix_name	MotifMatrix_name	cor	padj	maxDelta	Stage	MotifMatrix_Newname
SPI1	SPI1_322	0.923774	7.39259737013564e-207	24.2052	NotAD	SPI1
SPI1	SPI1_322	0.959935	2.04531540829805e-274	23.7223	LowAD	SPI1
SPI1	SPI1_322	0.946575	4.97062221373359e-244	19.7789	InterAD	SPI1
SPI1	SPI1_322	0.938867	6.98879936063816e-230	17.0779	HighAD	SPI1
FOSL2	FOSL2_105	0.546289	2.33459209188214e-37	13.4112	NotAD	FOSL2
FOSL2	FOSL2_105	0.526237	4.45395776362816e-34	11.5046	LowAD	FOSL2
IRF1	IRF1_629	0.604876	2.48119032352748e-48	11.2109	NotAD	IRF1
ELF1	ELF1_329	0.724884	9.28692104418742e-80	11.1245	NotAD	ELF1
JUND	JUND_124	0.698171	2.06984969280708e-71	11.1096	HighAD	JUND
IRF1	IRF1_629	0.889236	2.1705045321416e-168	10.9984	LowAD	IRF1
JUN	JUN_143	0.570913	1.05437171371224e-41	10.9601	LowAD	JUN
FOSB	FOSB_121	0.689878	5.29742920501353e-69	10.8733	NotAD	FOSB
ETV6	ETV6_335	0.586553	1.16966970036079e-44	10.8222	NotAD	ETV6
ETV6	ETV6_335	0.79506	2.48472928528422e-107	10.444	LowAD	ETV6
SOX4	SOX4_754	0.632112	2.96089406558779e-54	10.4354	LowAD	SOX4
ELF1	ELF1_329	0.794344	5.37063852479492e-107	10.3941	LowAD	ELF1
FOSL2	FOSL2_105	0.512496	5.93469223426966e-32	10.1868	InterAD	FOSL2
ETS2	ETS2_340	0.708459	1.63651232759721e-74	9.72774	NotAD	ETS2
SOX4	SOX4_754	0.634823	7.05935083008813e-55	9.57771	HighAD	SOX4
SOX9-AS1	SOX9_756	0.532327	4.73633507164189e-35	9.54395	LowAD	SOX9
ETS2	ETS2_340	0.813721	1.51201071218419e-116	9.34378	LowAD	ETS2
FOSB	FOSB_121	0.602539	7.5112710177457e-48	9.25062	LowAD	FOSB
IRF1	IRF1_629	0.888163	2.07865389216968e-167	9.08071	InterAD	IRF1
SOX9-AS1	SOX9_756	0.656536	4.2857094093917e-60	9.07847	InterAD	SOX9
SOX13	SOX13_761	0.661105	3.01190677558116e-61	8.9575	InterAD	SOX13
SOX9-AS1	SOX9_756	0.624891	1.25424439239591e-52	8.94393	HighAD	SOX9
FOSB	FOSB_121	0.848199	1.15928500523287e-136	8.88595	HighAD	FOSB
NFIA-AS2	NFIA_742	0.782438	1.26791754338088e-101	8.86392	NotAD	NFIA
STAT2	STAT2_778	0.509288	1.80205020004827e-31	8.78285	InterAD	STAT2
SOX12	SOX12_768	0.531942	5.47263065006522e-35	8.63097	NotAD	SOX12
ETV6	ETV6_335	0.688916	9.92948228180225e-69	8.56184	InterAD	ETV6
NFIA	NFIA_742	0.786528	1.97586319108799e-103	8.54715	LowAD	NFIA
ELF4	ELF4_323	0.745401	7.13219496905199e-87	8.45532	NotAD	ELF4
ELF1	ELF1_329	0.722704	4.83751528580224e-79	8.44773	InterAD	ELF1
NFIB	NFIB_741	0.553066	1.6134725695343e-38	8.38556	LowAD	NFIB
IRF1	IRF1_629	0.856787	1.83425997845189e-142	8.34166	HighAD	IRF1
FOSB	FOSB_121	0.720998	1.74479610773849e-78	8.23324	InterAD	FOSB
ELF4	ELF4_323	0.742296	9.39153076131749e-86	8.14447	LowAD	ELF4
DBX2	DBX2_554	0.544864	4.06206596396874e-37	7.97203	NotAD	DBX2
NEUROD6	NEUROD6_821	0.690923	2.66288763502275e-69	7.89051	NotAD	NEUROD6
SOX4	SOX4_754	0.643671	5.94300360266564e-57	7.80871	InterAD	SOX4
ETV6	ETV6_335	0.704774	2.18582101057983e-73	7.75775	HighAD	ETV6
ETS2	ETS2_340	0.708515	1.56809099161439e-74	7.74946	InterAD	ETS2
IRF3	IRF3_630	0.729003	3.90924854495556e-81	7.70072	NotAD	IRF3
ELF1	ELF1_329	0.703996	3.76274316457119e-73	7.66193	HighAD	ELF1
IRF3	IRF3_630	0.788823	1.83806497918206e-104	7.58476	LowAD	IRF3
NEUROD2	NEUROD2_73	0.851016	1.59494149324544e-138	7.4825	NotAD	NEUROD2
IRF8	IRF8_633	0.806656	6.13211590493215e-113	7.42187	NotAD	IRF8
IRF8	IRF8_633	0.875382	1.95867735325696e-156	7.4138	LowAD	IRF8
MESP2	MESP2_94	0.533409	3.16920420078819e-35	7.35021	NotAD	MESP2
CEBPB	CEBPB_140	0.850523	3.40014377503392e-138	7.28225	NotAD	CEBPB
IRF9	IRF9_636	0.861854	4.58286240478615e-146	7.24015	NotAD	IRF9
SOX13	SOX13_761	0.745242	8.1368329582928e-87	7.23516	LowAD	SOX13
ATOH7	ATOH7_84	0.554319	9.78152560998793e-39	7.16111	LowAD	ATOH7
IRF9	IRF9_636	0.686487	4.83430473463739e-68	7.09224	LowAD	IRF9
CEBPB	CEBPB_140	0.926329	2.10705234227475e-210	7.06427	LowAD	CEBPB
NFIA	NFIA_742	0.76739	2.66454217732656e-95	7.05759	HighAD	NFIA
GSX2	GSX2_546	0.588272	5.40346068973799e-45	7.01544	LowAD	GSX2
NFIA	NFIA_742	0.787858	5.0016186231243e-104	7.00784	InterAD	NFIA
NEUROD6	NEUROD6_821	0.754692	2.52087688746258e-90	6.91763	LowAD	NEUROD6
ETS2	ETS2_340	0.760797	1.11650059689744e-92	6.90676	HighAD	ETS2
MSX1	MSX1_501	0.764344	4.45054193104237e-94	6.8699	LowAD	MSX1
NFIB	NFIB_741	0.517219	1.1319515202097e-32	6.83268	HighAD	NFIB
SOX13	SOX13_761	0.679655	3.80574687953244e-66	6.79375	HighAD	SOX13
BHLHE22	BHLHE22_86	0.5253	6.27259975390045e-34	6.78057	NotAD	BHLHE22
CEBPB	CEBPB_140	0.886461	7.14763258082088e-166	6.64127	InterAD	CEBPB
NR1D2	NR1D2_841	0.60047	1.99363808367449e-47	6.58588	NotAD	NR1D2
FOXP4	FOXP4_358	0.668506	3.69865264955575e-63	6.58016	NotAD	FOXP4
FOXJ3	FOXJ3_378	0.561427	5.49961364370019e-40	6.58016	NotAD	FOXJ3
VSX1	VSX1_408	0.52917	1.52223033279721e-34	6.51073	LowAD	VSX1
ELF4	ELF4_323	0.677004	2.00707420845791e-65	6.48701	InterAD	ELF4
ATOH7	ATOH7_84	0.535001	1.74227713577933e-35	6.48193	HighAD	ATOH7
RFX2	RFX2_724	0.534436	2.15902874825121e-35	6.45779	NotAD	RFX2
NEUROD6	NEUROD6_821	0.777287	2.10060760600535e-99	6.43455	HighAD	NEUROD6
VSX1	VSX1_408	0.503533	1.28692775300109e-30	6.38963	NotAD	VSX1
NEUROD2	NEUROD2_73	0.890773	8.17736555312349e-170	6.34347	LowAD	NEUROD2
IRF3	IRF3_630	0.907248	1.45122468874258e-186	6.28969	InterAD	IRF3
CEBPZ	CEBPZ_806	0.592445	8.1741372671705e-46	6.28044	NotAD	CEBPZ
EN2	EN2_506	0.61215	7.39870070131703e-50	6.27424	NotAD	EN2
STAT6	STAT6_776	0.890433	1.69792407641555e-169	6.23082	LowAD	STAT6
ELF4	ELF4_323	0.692361	1.0254067773645e-69	6.17572	HighAD	ELF4
NEUROD6	NEUROD6_821	0.731892	4.08103095024099e-82	6.09095	InterAD	NEUROD6
ETV2	ETV2_324	0.636727	2.55845188126143e-55	6.06256	InterAD	ETV2
FLI1	FLI1_337	0.55166	2.82635319659059e-38	6.05486	NotAD	FLI1
HLX-AS1	HLX_478	0.536061	1.1701879095663e-35	6.02072	HighAD	HLX
RORA	RORA_658	0.581639	1.0323742325369e-43	6.00286	NotAD	RORA
NFYA	NFYA_288	0.607214	8.10026401997392e-49	5.99335	NotAD	NFYA
EMX2	EMX2_525	0.6062	1.31787688031364e-48	5.99286	NotAD	EMX2
IRF8	IRF8_633	0.828766	9.07331390546278e-125	5.99163	InterAD	IRF8
NEUROD2	NEUROD2_73	0.854523	6.74361624153778e-141	5.98484	HighAD	NEUROD2
PBX3	PBX3_518	0.545386	3.31320328618292e-37	5.96689	LowAD	PBX3
EMX2	EMX2_525	0.664554	3.93832547035567e-62	5.93771	LowAD	EMX2
IRF2	IRF2_634	0.775986	7.4938596163086e-99	5.89002	NotAD	IRF2
HNF4G	HNF4G_688	0.535661	1.36380007361031e-35	5.86254	NotAD	HNF4G
IRF9	IRF9_636	0.833482	1.63399848583739e-127	5.82225	InterAD	IRF9
FOXP4	FOXP4_358	0.689416	7.15577944615783e-69	5.80212	HighAD	FOXP4
FOXJ3	FOXJ3_378	0.668182	4.48475756425734e-63	5.80212	HighAD	FOXJ3
CEBPB	CEBPB_140	0.872397	4.78931523526261e-154	5.77497	HighAD	CEBPB
SOX30	SOX30_747	0.599514	3.11143801486193e-47	5.75252	InterAD	SOX30
IRF2	IRF2_634	0.757729	1.73645649946562e-91	5.72898	LowAD	IRF2
RUNX1	RUNX1_733	0.669528	1.99109863746352e-63	5.72304	LowAD	RUNX1
NEUROD2	NEUROD2_73	0.856609	2.44148197541328e-142	5.71646	InterAD	NEUROD2
CEBPD	CEBPD_152	0.712345	1.0139888922889e-75	5.67624	NotAD	CEBPD
FOXP4	FOXP4_358	0.758525	8.55635059170156e-92	5.65654	LowAD	FOXP4
FOXJ3	FOXJ3_378	0.747191	1.58331773099406e-87	5.65654	LowAD	FOXJ3
CEBPD	CEBPD_152	0.798577	5.41363817452126e-109	5.64836	LowAD	CEBPD
STAT6	STAT6_776	0.795342	1.83697118601199e-107	5.64629	NotAD	STAT6
PBX3	PBX3_518	0.502462	1.84164032422537e-30	5.62501	InterAD	PBX3
GSX2	GSX2_546	0.58758	7.36286913315156e-45	5.58749	InterAD	GSX2
IRF3	IRF3_630	0.87346	6.86424435507526e-155	5.56395	HighAD	IRF3
CEBPA	CEBPA_155	0.662518	1.31554337537376e-61	5.56132	NotAD	CEBPA
NR1D2	NR1D2_841	0.548627	9.34237069705594e-38	5.52961	LowAD	NR1D2
ERF	ERF_325	0.517593	9.91711917349831e-33	5.52727	InterAD	ERF
RORA	RORA_658	0.693147	6.08771475440915e-70	5.50869	LowAD	RORA
FOXJ3	FOXJ3_378	0.760116	2.05858896081876e-92	5.50671	InterAD	FOXJ3
FOXP4	FOXP4_358	0.646246	1.43679609171703e-57	5.50671	InterAD	FOXP4
FLI1	FLI1_337	0.60133	1.32884956239668e-47	5.50608	LowAD	FLI1
IRF8	IRF8_633	0.769043	5.68413011056277e-96	5.49243	HighAD	IRF8
MESP2	MESP2_94	0.63468	7.61646180129525e-55	5.44375	InterAD	MESP2
IRF9	IRF9_636	0.785227	7.48557556640721e-103	5.41139	HighAD	IRF9
HNF4G	HNF4G_688	0.665809	1.86423175130746e-62	5.39074	LowAD	HNF4G
BHLHE22	BHLHE22_86	0.50548	6.63357650287681e-31	5.38475	HighAD	BHLHE22
CEBPA	CEBPA_155	0.837848	3.94543003959552e-130	5.37606	LowAD	CEBPA
CEBPZ	CEBPZ_806	0.741833	1.37549572420157e-85	5.33276	LowAD	CEBPZ
CEBPD	CEBPD_152	0.811681	1.72178250068444e-115	5.30951	InterAD	CEBPD
CEBPZ	CEBPZ_806	0.687472	2.54731691470899e-68	5.30725	InterAD	CEBPZ
STAT6	STAT6_776	0.864664	3.97313741434864e-148	5.27295	InterAD	STAT6
CEBPG	CEBPG_128	0.600339	2.11759764479341e-47	5.24908	LowAD	CEBPG
NFYC-AS1	NFYC_800	0.560867	6.91016641899169e-40	5.24186	LowAD	NFYC
NFYA	NFYA_288	0.534869	1.83365103141034e-35	5.23539	LowAD	NFYA
NFYA	NFYA_288	0.608412	4.53730377427238e-49	5.20976	HighAD	NFYA
ERF	ERF_325	0.515653	1.96665603934953e-32	5.204	HighAD	ERF
ELK3	ELK3_327	0.625437	9.49022179519882e-53	5.17903	LowAD	ELK3
FOXO1	FOXO1_361	0.700165	5.30726610988615e-72	5.16474	InterAD	FOXO1
FOXN2	FOXN2_854	0.750006	1.44711853115007e-88	5.13394	HighAD	FOXN2
CEBPA	CEBPA_155	0.818979	2.47288694167661e-119	5.13387	InterAD	CEBPA
NFYA	NFYA_288	0.534438	2.1521132023757e-35	5.06569	InterAD	NFYA
BHLHE22	BHLHE22_86	0.543802	6.10954190864988e-37	5.05692	InterAD	BHLHE22
NFYC-AS1	NFYC_800	0.561632	5.04379554055968e-40	5.02831	InterAD	NFYC
FOXN2	FOXN2_854	0.772633	1.89499221543685e-97	4.95023	InterAD	FOXN2
ZNF35	ZNF35_239	0.674309	1.068495080814e-64	4.82184	HighAD	ZNF35
MNX1-AS1	MNX1_466	0.653453	2.50683534740131e-59	4.7835	InterAD	MNX1
RUNX1	RUNX1_733	0.568977	2.38445895691817e-41	4.64896	InterAD	RUNX1
IRF2	IRF2_634	0.786181	2.81767392522036e-103	4.61875	InterAD	IRF2
FLI1	FLI1_337	0.503425	1.33082940663714e-30	4.60243	InterAD	FLI1
HNF4G	HNF4G_688	0.669732	1.75759343824128e-63	4.59678	HighAD	HNF4G
EMX2	EMX2_525	0.678258	9.15746048298646e-66	4.57301	InterAD	EMX2
MSX2	MSX2_449	0.502365	1.90280803465546e-30	4.56756	InterAD	MSX2
HNF4G	HNF4G_688	0.721351	1.33975377549669e-78	4.56514	InterAD	HNF4G
CEBPD	CEBPD_152	0.680777	1.87289134750817e-66	4.55899	HighAD	CEBPD
ZNF35	ZNF35_239	0.757299	2.53835073750891e-91	4.55626	InterAD	ZNF35
IRF2	IRF2_634	0.802741	5.2656156423131e-111	4.49735	HighAD	IRF2
CEBPE	CEBPE_107	0.61554	1.39138798116285e-50	4.45042	InterAD	CEBPE
NR1D2	NR1D2_841	0.701445	2.20292240057529e-72	4.42421	InterAD	NR1D2
SOX3	SOX3_759	0.646113	1.54608421895335e-57	4.42066	InterAD	SOX3
TFAP4	TFAP4_23	0.558922	1.52581032356498e-39	4.37721	HighAD	TFAP4
NR1D2	NR1D2_841	0.593426	5.20598057238183e-46	4.36652	HighAD	NR1D2
CEBPA	CEBPA_155	0.782129	1.72482950532436e-101	4.34032	HighAD	CEBPA
TCF7	TCF7_750	0.641355	2.10672909378603e-56	4.33926	InterAD	TCF7
SOX3	SOX3_759	0.716489	4.95014514575568e-77	4.28372	HighAD	SOX3
TCF7	TCF7_750	0.669107	2.56564287056827e-63	4.26865	HighAD	TCF7
TBR1	TBR1_786	0.854753	4.68950916387545e-141	4.26751	HighAD	TBR1
CEBPG	CEBPG_128	0.68055	2.16291954376743e-66	4.26567	HighAD	CEBPG

## Sheet: Table_S4_legend
Supplemental Table S4: Supplemental_Table_S4.xlsx Stage-resolved positive transcription factor regulators across AD progression, including TF–gene correlation coefficients, significance (padj), motif activity changes (maxDelta), and assigned AD stages.
