# Supplementary material for: Cell type–specific gene regulatory atlas prioritizes drug targets and repurposable medicines in Alzheimer's disease
Source: HighWire-hosted journal article supplement (doi:10.1101/gr.280436.125), 2026-01-21
Supplement: Supplemental_Table_S5.xlsx [file Supplemental_Table_S5.xlsx]

## Sheet: Supplemental_Table_S5
rsid	peaksName	nearestGene	peakType	CellType	Stage
rs10207708	chr2_127094466_127094966	BIN1	Intronic	Ast	NotAD
rs11694264	chr2_127094466_127094966	BIN1	Intronic	Ast	NotAD
rs74504435	chr7_54881344_54881844	SEC61G	Distal	Ast	NotAD
rs1727134	chr7_100215744_100216244	PVRIG	Intronic	Ast	NotAD
rs35146386	chr7_100492008_100492508	NYAP1	Intronic	Ast	NotAD
rs12539172	chr7_100493867_100494367	NYAP1	Exonic	Ast	NotAD
rs10091215	chr8_27594194_27594694	MIR6843	Distal	Ast	NotAD
rs7817366	chr8_27594194_27594694	MIR6843	Distal	Ast	NotAD
rs7821500	chr8_27594194_27594694	MIR6843	Distal	Ast	NotAD
rs146954978	chr8_27594194_27594694	MIR6843	Distal	Ast	NotAD
rs10092082	chr8_27594764_27595264	MIR6843	Distal	Ast	NotAD
rs9331931	chr8_27600102_27600602	MIR6843	Intronic	Ast	NotAD
rs9331930	chr8_27600731_27601231	MIR6843	Intronic	Ast	NotAD
rs28541694	chr8_27604360_27604860	MIR6843	Intronic	Ast	NotAD
rs9331908	chr8_27606018_27606518	MIR6843	Intronic	Ast	NotAD
rs1532276	chr8_27608624_27609124	MIR6843	Exonic	Ast	NotAD
rs1532277	chr8_27608624_27609124	MIR6843	Exonic	Ast	NotAD
rs1532278	chr8_27608624_27609124	MIR6843	Exonic	Ast	NotAD
rs867232	chr8_27609341_27609841	MIR6843	Intronic	Ast	NotAD
rs17515931	chr8_27612517_27613017	MIR6843	Intronic	Ast	NotAD
rs34109053	chr8_27613023_27613523	CLU	Intronic	Ast	NotAD
rs73231005	chr8_27613023_27613523	CLU	Intronic	Ast	NotAD
rs530324	chr8_27633602_27634102	SCARA3	Promoter	Ast	NotAD
rs138529507	chr8_27636409_27636909	SCARA3	Intronic	Ast	NotAD
rs3019173	chr8_95008341_95008841	TP53INP1	Intronic	Ast	NotAD
rs1693551	chr8_100663233_100663733	SNX31	Promoter	Ast	NotAD
rs1870142	chr10_80422093_80422593	PRXL2A	Intronic	Ast	NotAD
rs567075	chr11_86118973_86119473	PICALM	Distal	Ast	NotAD
rs60228070	chr11_121487183_121487683	SORL1	Intronic	Ast	NotAD
rs9665907	chr11_121564404_121564904	SORL1	Intronic	Ast	NotAD
rs11218343	chr11_121564404_121564904	SORL1	Intronic	Ast	NotAD
rs1784920	chr11_121566454_121566954	SORL1	Intronic	Ast	NotAD
rs12434433	chr14_105737473_105737973	MIR8071-1	Distal	Ast	NotAD
rs11858666	chr15_63233712_63234212	APH1B	Intronic	Ast	NotAD
rs35763222	chr15_63348799_63349299	CA12	Intronic	Ast	NotAD
rs11150576	chr16_29953899_29954399	TMEM219	Intronic	Ast	NotAD
rs58217768	chr16_29992327_29992827	INO80E	Exonic	Ast	NotAD
rs11642740	chr16_30049319_30049819	FAM57B	Intronic	Ast	NotAD
rs75828101	chr17_4834568_4835068	MINK1	Intronic	Ast	NotAD
rs55996632	chr17_45858152_45858652	SPPL2C	Intronic	Ast	NotAD
rs55886302	chr17_45858152_45858652	SPPL2C	Intronic	Ast	NotAD
rs77561671	chr17_45899136_45899636	MAPT-IT1	Intronic	Ast	NotAD
rs62056792	chr17_45899136_45899636	MAPT-IT1	Intronic	Ast	NotAD
rs1864325	chr17_45900419_45900919	MAPT-IT1	Intronic	Ast	NotAD
rs62056795	chr17_45900419_45900919	MAPT-IT1	Intronic	Ast	NotAD
rs62056796	chr17_45900419_45900919	MAPT-IT1	Intronic	Ast	NotAD
rs17565025	chr17_45935067_45935567	MAPT-IT1	Intronic	Ast	NotAD
rs77924424	chr17_45935067_45935567	MAPT-IT1	Intronic	Ast	NotAD
rs62062784	chr17_45946927_45947427	MAPT-IT1	Intronic	Ast	NotAD
rs62062785	chr17_45946927_45947427	MAPT-IT1	Intronic	Ast	NotAD
rs62062786	chr17_45946927_45947427	MAPT-IT1	Intronic	Ast	NotAD
rs62062787	chr17_45947452_45947952	STH	Intronic	Ast	NotAD
rs62062788	chr17_45947452_45947952	STH	Intronic	Ast	NotAD
rs62062789	chr17_45947452_45947952	STH	Intronic	Ast	NotAD
rs62062790	chr17_45947452_45947952	STH	Intronic	Ast	NotAD
rs62062791	chr17_45947452_45947952	STH	Intronic	Ast	NotAD
rs62062794	chr17_45948978_45949478	STH	Intronic	Ast	NotAD
rs242561	chr17_45948978_45949478	STH	Intronic	Ast	NotAD
rs55821155	chr17_45954874_45955374	STH	Intronic	Ast	NotAD
rs56080482	chr17_45954874_45955374	STH	Intronic	Ast	NotAD
rs62063775	chr17_45973271_45973771	STH	Exonic	Ast	NotAD
rs62063776	chr17_45973271_45973771	STH	Exonic	Ast	NotAD
rs117124984	chr17_45973800_45974300	STH	Exonic	Ast	NotAD
rs118087478	chr17_45973800_45974300	STH	Exonic	Ast	NotAD
rs77875796	chr17_45973800_45974300	STH	Exonic	Ast	NotAD
rs62063777	chr17_45975550_45976050	STH	Exonic	Ast	NotAD
rs754513	chr17_45978167_45978667	STH	Exonic	Ast	NotAD
rs754512	chr17_45978167_45978667	STH	Exonic	Ast	NotAD
rs1052551	chr17_45991458_45991958	STH	Intronic	Ast	NotAD
rs62063799	chr17_45991458_45991958	STH	Intronic	Ast	NotAD
rs62063800	chr17_45991458_45991958	STH	Intronic	Ast	NotAD
rs17651857	chr17_45992121_45992621	STH	Intronic	Ast	NotAD
rs74759276	chr17_45992121_45992621	STH	Intronic	Ast	NotAD
rs17651887	chr17_45992121_45992621	STH	Intronic	Ast	NotAD
rs78599197	chr17_45992121_45992621	STH	Intronic	Ast	NotAD
rs62064664	chr17_46003917_46004417	STH	Intronic	Ast	NotAD
rs62064665	chr17_46003917_46004417	STH	Intronic	Ast	NotAD
rs111324579	chr17_46004447_46004947	STH	Intronic	Ast	NotAD
rs113201171	chr17_46004447_46004947	STH	Intronic	Ast	NotAD
rs77768866	chr17_46044260_46044760	STH	Exonic	Ast	NotAD
rs2696590	chr17_46144136_46144636	KANSL1-AS1	Intronic	Ast	NotAD
rs4366	chr17_63497626_63498126	ACE	Exonic	Ast	NotAD
rs8100672	chr19_1021506_1022006	TMEM259	Promoter	Ast	NotAD
rs4802235	chr19_44721266_44721766	CEACAM16	Distal	Ast	NotAD
rs187010311	chr19_44774619_44775119	CBLC	Distal	Ast	NotAD
rs569705402	chr19_44784292_44784792	CBLC	Intronic	Ast	NotAD
rs574578352	chr19_44796692_44797192	BCAM	Intronic	Ast	NotAD
rs200210470	chr19_44799855_44800355	BCAM	Intronic	Ast	NotAD
rs10418198	chr19_44799855_44800355	BCAM	Intronic	Ast	NotAD
rs187556678	chr19_44799855_44800355	BCAM	Intronic	Ast	NotAD
rs73048258	chr19_44807881_44808381	BCAM	Promoter	Ast	NotAD
rs149626525	chr19_44807881_44808381	BCAM	Promoter	Ast	NotAD
rs560898656	chr19_44807881_44808381	BCAM	Promoter	Ast	NotAD
rs113748136	chr19_44809523_44810023	BCAM	Intronic	Ast	NotAD
rs77241309	chr19_44845776_44846276	NECTIN2	Promoter	Ast	NotAD
rs2927472	chr19_44845776_44846276	NECTIN2	Promoter	Ast	NotAD
rs3810143	chr19_44845776_44846276	NECTIN2	Promoter	Ast	NotAD
rs57550705	chr19_44866015_44866515	NECTIN2	Intronic	Ast	NotAD
rs34111552	chr19_44866015_44866515	NECTIN2	Intronic	Ast	NotAD
rs549854089	chr19_44903546_44904046	APOE	Promoter	Ast	NotAD
rs435380	chr19_44903546_44904046	APOE	Promoter	Ast	NotAD
rs446037	chr19_44904112_44904612	APOE	Promoter	Ast	NotAD
rs434132	chr19_44904112_44904612	APOE	Promoter	Ast	NotAD
rs439382	chr19_44904854_44905354	APOE	Promoter	Ast	NotAD
rs769448	chr19_44906322_44906822	APOE	Exonic	Ast	NotAD
rs769452	chr19_44907594_44908094	APOE	Exonic	Ast	NotAD
rs537741299	chr19_44909635_44910135	APOE	Distal	Ast	NotAD
rs1081106	chr19_44909635_44910135	APOE	Distal	Ast	NotAD
rs557223438	chr19_44913360_44913860	APOC1	Promoter	Ast	NotAD
rs72654441	chr19_44913360_44913860	APOC1	Promoter	Ast	NotAD
rs10402642	chr19_44950484_44950984	CLPTM1	Distal	Ast	NotAD
rs7248162	chr19_44951207_44951707	CLPTM1	Distal	Ast	NotAD
rs7247227	chr19_44951207_44951707	CLPTM1	Distal	Ast	NotAD
rs7247551	chr19_44951207_44951707	CLPTM1	Distal	Ast	NotAD
rs892101	chr19_44951921_44952421	CLPTM1	Distal	Ast	NotAD
rs143674704	chr19_44955042_44955542	CLPTM1	Exonic	Ast	NotAD
rs2238682	chr19_44955042_44955542	CLPTM1	Exonic	Ast	NotAD
rs11669173	chr19_44989100_44989600	RELB	Intronic	Ast	NotAD
rs10425074	chr19_45136499_45136999	NKPD1	Intronic	Ast	NotAD
rs117034857	chr19_45455615_45456115	FOSB	Intronic	Ast	NotAD
rs927174	chr20_56439962_56440462	CASS4	Intronic	Ast	NotAD
rs11585858	chr1_161185932_161186432	B4GALT3	Exonic	Mic	NotAD
rs2070901	chr1_161215006_161215506	FCER1G	Promoter	Mic	NotAD
rs2070902	chr1_161217755_161218255	FCER1G	Exonic	Mic	NotAD
rs749007	chr2_127102055_127102555	BIN1	Intronic	Mic	NotAD
rs749006	chr2_127102055_127102555	BIN1	Intronic	Mic	NotAD
rs13025717	chr2_127128410_127128910	BIN1	Distal	Mic	NotAD
rs13025765	chr2_127128410_127128910	BIN1	Distal	Mic	NotAD
rs12618593	chr2_127128410_127128910	BIN1	Distal	Mic	NotAD
rs12617835	chr2_127128410_127128910	BIN1	Distal	Mic	NotAD
rs6710467	chr2_127132295_127132795	BIN1	Distal	Mic	NotAD
rs60692476	chr2_127132295_127132795	BIN1	Distal	Mic	NotAD
rs60447541	chr2_127132295_127132795	BIN1	Distal	Mic	NotAD
rs113112754	chr2_127132798_127133298	BIN1	Distal	Mic	NotAD
rs4663104	chr2_127132798_127133298	BIN1	Distal	Mic	NotAD
rs35968837	chr2_127133306_127133806	BIN1	Distal	Mic	NotAD
rs34546266	chr2_127133306_127133806	BIN1	Distal	Mic	NotAD
rs60572885	chr2_127133306_127133806	BIN1	Distal	Mic	NotAD
rs56193035	chr2_127133306_127133806	BIN1	Distal	Mic	NotAD
rs57109420	chr2_127133306_127133806	BIN1	Distal	Mic	NotAD
rs59253801	chr2_127133884_127134384	BIN1	Distal	Mic	NotAD
rs59176034	chr2_127133884_127134384	BIN1	Distal	Mic	NotAD
rs72838284	chr2_127133884_127134384	BIN1	Distal	Mic	NotAD
rs72838285	chr2_127133884_127134384	BIN1	Distal	Mic	NotAD
rs34779859	chr2_127135116_127135616	BIN1	Distal	Mic	NotAD
rs6733839	chr2_127135116_127135616	BIN1	Distal	Mic	NotAD
rs72838287	chr2_127135116_127135616	BIN1	Distal	Mic	NotAD
rs72838288	chr2_127135116_127135616	BIN1	Distal	Mic	NotAD
rs745717	chr2_127136308_127136808	BIN1	Distal	Mic	NotAD
rs56368748	chr2_127136308_127136808	BIN1	Distal	Mic	NotAD
rs10933431	chr2_233116928_233117428	INPP5D	Intronic	Mic	NotAD
rs10933432	chr2_233116928_233117428	INPP5D	Intronic	Mic	NotAD
rs6715767	chr2_233165684_233166184	ATG16L1	Intronic	Mic	NotAD
rs61367113	chr5_86967045_86967545	LOC101929380	Promoter	Mic	NotAD
rs62375391	chr5_86997469_86997969	LOC101929380	Intronic	Mic	NotAD
rs62375397	chr5_87002547_87003047	LOC101929380	Intronic	Mic	NotAD
rs58233521	chr5_87079843_87080343	MIR4280	Intronic	Mic	NotAD
rs113706587	chr5_180200924_180201424	RASGEF1C	Intronic	Mic	NotAD
rs114841132	chr5_180207521_180208021	RASGEF1C	Intronic	Mic	NotAD
rs9268521	chr6_32413394_32413894	BTNL2	Distal	Mic	NotAD
rs9268522	chr6_32413394_32413894	BTNL2	Distal	Mic	NotAD
rs9268627	chr6_32437878_32438378	HLA-DRA	Promoter	Mic	NotAD
rs7773030	chr6_32473403_32473903	HLA-DRA	Distal	Mic	NotAD
rs679242	chr6_32602939_32603439	HLA-DRB1	Distal	Mic	NotAD
rs2760994	chr6_32606115_32606615	HLA-DRB1	Distal	Mic	NotAD
rs660895	chr6_32609202_32609702	HLA-DRB1	Distal	Mic	NotAD
rs535852	chr6_32609773_32610273	HLA-DRB1	Distal	Mic	NotAD
rs532965	chr6_32609773_32610273	HLA-DRB1	Distal	Mic	NotAD
rs9271579	chr6_32622375_32622875	HLA-DQA1	Distal	Mic	NotAD
rs9271580	chr6_32622375_32622875	HLA-DQA1	Distal	Mic	NotAD
rs9271608	chr6_32623644_32624144	HLA-DQA1	Distal	Mic	NotAD
rs9275213	chr6_32690144_32690644	HLA-DQB1	Distal	Mic	NotAD
rs9275223	chr6_32691941_32692441	HLA-DQB1	Distal	Mic	NotAD
rs9275373	chr6_32700448_32700948	HLA-DQB1	Distal	Mic	NotAD
rs2858331	chr6_32713238_32713738	HLA-DQA2	Distal	Mic	NotAD
rs7454108	chr6_32713238_32713738	HLA-DQA2	Distal	Mic	NotAD
rs143332484	chr6_41161254_41161754	TREM2	Exonic	Mic	NotAD
rs75932628	chr6_41161254_41161754	TREM2	Exonic	Mic	NotAD
rs9357347	chr6_41182642_41183142	TREML2	Distal	Mic	NotAD
rs3800342	chr6_41191517_41192017	TREML2	Exonic	Mic	NotAD
rs4714447	chr6_41271737_41272237	TREM1	Distal	Mic	NotAD
rs9648346	chr7_28120245_28120745	JAZF1-AS1	Intronic	Mic	NotAD
rs4424195	chr7_100044645_100045145	ZSCAN21	Distal	Mic	NotAD
rs2405441	chr7_100167782_100168282	GAL3ST4	Exonic	Mic	NotAD
rs13230744	chr7_100199929_100200429	PVRIG	Exonic	Mic	NotAD
rs2405442	chr7_100373212_100373712	PILRA	Exonic	Mic	NotAD
rs1859788	chr7_100373777_100374277	PILRA	Intronic	Mic	NotAD
rs10255133	chr7_100384588_100385088	PILRA	Intronic	Mic	NotAD
rs55773945	chr7_100444604_100445104	PPP1R35	Distal	Mic	NotAD
rs12703526	chr7_143410418_143410918	EPHA1	Promoter	Mic	NotAD
rs11762262	chr7_143410418_143410918	EPHA1	Promoter	Mic	NotAD
rs11769559	chr7_143413834_143414334	EPHA1	Intronic	Mic	NotAD
rs13265352	chr8_27390878_27391378	MIR6842	Intronic	Mic	NotAD
rs2279590	chr8_27598444_27598944	MIR6843	Exonic	Mic	NotAD
rs61366982	chr8_27598444_27598944	MIR6843	Exonic	Mic	NotAD
rs6982393	chr8_94968372_94968872	TP53INP1	Intronic	Mic	NotAD
rs11257227	chr10_11665906_11666406	USP6NL	Distal	Mic	NotAD
rs2486302	chr10_80316626_80317126	MAT1A	Distal	Mic	NotAD
rs4934169	chr10_80443568_80444068	TSPAN14	Distal	Mic	NotAD
rs7896832	chr10_80497700_80498200	LOC101929574	Intronic	Mic	NotAD
rs9633740	chr10_80505496_80505996	LOC101929574	Intronic	Mic	NotAD
rs1870138	chr10_80509731_80510231	LOC101929574	Intronic	Mic	NotAD
rs1870137	chr10_80509731_80510231	LOC101929574	Intronic	Mic	NotAD
rs1870148	chr10_80511338_80511838	LOC101929574	Intronic	Mic	NotAD
rs7096909	chr10_80524557_80525057	LOC101929574	Exonic	Mic	NotAD
rs10838702	chr11_47389225_47389725	SPI1	Distal	Mic	NotAD
rs1377416	chr11_47394735_47395235	MIR4487	Distal	Mic	NotAD
rs10769263	chr11_47395429_47395929	MIR4487	Distal	Mic	NotAD
rs7232	chr11_60172726_60173226	MS4A6A	Exonic	Mic	NotAD
rs632185	chr11_60183489_60183989	MS4A6A	Exonic	Mic	NotAD
rs55661415	chr11_60184703_60185203	MS4A6A	Promoter	Mic	NotAD
rs1820430	chr11_60185816_60186316	MS4A6A	Promoter	Mic	NotAD
rs718376	chr11_60235251_60235751	MIR6503	Distal	Mic	NotAD
rs34862992	chr11_60251393_60251893	MS4A4A	Distal	Mic	NotAD
rs636317	chr11_60251393_60251893	MS4A4A	Distal	Mic	NotAD
rs636341	chr11_60251393_60251893	MS4A4A	Distal	Mic	NotAD
rs5792178	chr11_60259577_60260077	MS4A4A	Distal	Mic	NotAD
rs1365247	chr11_60259577_60260077	MS4A4A	Distal	Mic	NotAD
rs7128450	chr11_60263319_60263819	MS4A4A	Distal	Mic	NotAD
rs11824773	chr11_60309369_60309869	MS4A6E	Distal	Mic	NotAD
rs7103808	chr11_60310636_60311136	MS4A6E	Distal	Mic	NotAD
rs61900467	chr11_60310636_60311136	MS4A6E	Distal	Mic	NotAD
rs12792791	chr11_60314890_60315390	MS4A6E	Distal	Mic	NotAD
rs2868118	chr11_60332678_60333178	MS4A6E	Promoter	Mic	NotAD
rs2868119	chr11_60332678_60333178	MS4A6E	Promoter	Mic	NotAD
rs2868120	chr11_60332678_60333178	MS4A6E	Promoter	Mic	NotAD
rs2868121	chr11_60332678_60333178	MS4A6E	Promoter	Mic	NotAD
rs10897049	chr11_60332678_60333178	MS4A6E	Promoter	Mic	NotAD
rs4477457	chr11_60332678_60333178	MS4A6E	Promoter	Mic	NotAD
rs10792265	chr11_60332678_60333178	MS4A6E	Promoter	Mic	NotAD
rs10750933	chr11_60333344_60333844	MS4A6E	Promoter	Mic	NotAD
rs4506675	chr11_60333991_60334491	MS4A6E	Promoter	Mic	NotAD
rs10792267	chr11_60333991_60334491	MS4A6E	Promoter	Mic	NotAD
rs7924433	chr11_60333991_60334491	MS4A6E	Promoter	Mic	NotAD
rs867611	chr11_86065046_86065546	PICALM	Intronic	Mic	NotAD
rs17817992	chr11_86067309_86067809	PICALM	Intronic	Mic	NotAD
rs36233256	chr11_86130136_86130636	PICALM	Distal	Mic	NotAD
rs4944560	chr11_86133811_86134311	PICALM	Distal	Mic	NotAD
rs10898437	chr11_86136472_86136972	PICALM	Distal	Mic	NotAD
rs11234556	chr11_86138256_86138756	PICALM	Distal	Mic	NotAD
rs3844143	chr11_86138818_86139318	PICALM	Distal	Mic	NotAD
rs10792831	chr11_86141559_86142059	PICALM	Distal	Mic	NotAD
rs61905902	chr11_86146917_86147417	PICALM	Distal	Mic	NotAD
rs10898438	chr11_86146917_86147417	PICALM	Distal	Mic	NotAD
rs12786057	chr11_86146917_86147417	PICALM	Distal	Mic	NotAD
rs10792832	chr11_86156336_86156836	PICALM	Distal	Mic	NotAD
rs10898441	chr11_86157122_86157622	EED	Distal	Mic	NotAD
rs3851179	chr11_86157122_86157622	EED	Distal	Mic	NotAD
rs11603136	chr11_86163089_86163589	EED	Distal	Mic	NotAD
rs74685827	chr11_121482027_121482527	SORL1	Intronic	Mic	NotAD
rs80256323	chr11_121562978_121563478	SORL1	Intronic	Mic	NotAD
rs75279208	chr11_121575212_121575712	SORL1	Intronic	Mic	NotAD
rs117807585	chr11_121585170_121585670	SORL1	Intronic	Mic	NotAD
rs2282647	chr11_121590620_121591120	SORL1	Exonic	Mic	NotAD
rs12588482	chr14_52844580_52845080	GNPNAT1	Distal	Mic	NotAD
rs4904918	chr14_92460774_92461274	RIN3	Intronic	Mic	NotAD
rs941648	chr14_92465335_92465835	RIN3	Intronic	Mic	NotAD
rs3993878	chr14_92465335_92465835	RIN3	Intronic	Mic	NotAD
rs10129711	chr14_92465335_92465835	RIN3	Intronic	Mic	NotAD
rs10129728	chr14_92465335_92465835	RIN3	Intronic	Mic	NotAD
rs10130041	chr14_92465335_92465835	RIN3	Intronic	Mic	NotAD
rs4900124	chr14_92466039_92466539	RIN3	Intronic	Mic	NotAD
rs4904922	chr14_92466039_92466539	RIN3	Intronic	Mic	NotAD
rs4904923	chr14_92466039_92466539	RIN3	Intronic	Mic	NotAD
rs10130373	chr14_92466039_92466539	RIN3	Intronic	Mic	NotAD
rs12881735	chr14_92466039_92466539	RIN3	Intronic	Mic	NotAD
rs12880508	chr14_92466039_92466539	RIN3	Intronic	Mic	NotAD
rs17783630	chr14_92488784_92489284	RIN3	Intronic	Mic	NotAD
rs2094473	chr14_92488784_92489284	RIN3	Intronic	Mic	NotAD
rs10147792	chr14_92488784_92489284	RIN3	Intronic	Mic	NotAD
rs10147551	chr14_92488784_92489284	RIN3	Intronic	Mic	NotAD
rs61977322	chr14_92490441_92490941	RIN3	Intronic	Mic	NotAD
rs12888354	chr14_92493484_92493984	RIN3	Exonic	Mic	NotAD
rs111340278	chr15_63283051_63283551	APH1B	Intronic	Mic	NotAD
rs9939286	chr16_31150948_31151448	PRSS36	Promoter	Mic	NotAD
rs9931998	chr16_81738809_81739309	PLCG2	Promoter	Mic	NotAD
rs12446781	chr16_81739405_81739905	PLCG2	Intronic	Mic	NotAD
rs12444183	chr16_81739405_81739905	PLCG2	Intronic	Mic	NotAD
rs12444189	chr16_81739405_81739905	PLCG2	Intronic	Mic	NotAD
rs4407053	chr16_81740087_81740587	PLCG2	Intronic	Mic	NotAD
rs4544235	chr16_81740087_81740587	PLCG2	Intronic	Mic	NotAD
rs34716007	chr17_5166231_5166731	ZNF594	Intronic	Mic	NotAD
rs55756850	chr17_5166231_5166731	ZNF594	Intronic	Mic	NotAD
rs7225151	chr17_5233519_5234019	SCIMP	Intronic	Mic	NotAD
rs75511804	chr17_5234579_5235079	SCIMP	Promoter	Mic	NotAD
rs10491140	chr17_45873593_45874093	MAPT	Intronic	Mic	NotAD
rs62055491	chr17_45873593_45874093	MAPT	Intronic	Mic	NotAD
rs34416056	chr17_45873593_45874093	MAPT	Intronic	Mic	NotAD
rs62055492	chr17_45873593_45874093	MAPT	Intronic	Mic	NotAD
rs2158257	chr17_46026545_46027045	STH	Exonic	Mic	NotAD
rs17663792	chr17_46194899_46195399	KANSL1-AS1	Intronic	Mic	NotAD
rs2732660	chr17_46194899_46195399	KANSL1-AS1	Intronic	Mic	NotAD
rs616338	chr17_49219780_49220280	GNGT2	Intronic	Mic	NotAD
rs2526377	chr17_58332343_58332843	MIR142	Promoter	Mic	NotAD
rs75364577	chr19_1027955_1028455	CNN2	Intronic	Mic	NotAD
rs144928319	chr19_1027955_1028455	CNN2	Intronic	Mic	NotAD
rs113353568	chr19_1037409_1037909	ABCA7	Exonic	Mic	NotAD
rs111525696	chr19_1037409_1037909	ABCA7	Exonic	Mic	NotAD
rs72973561	chr19_1037409_1037909	ABCA7	Exonic	Mic	NotAD
rs72618590	chr19_1037942_1038442	ABCA7	Promoter	Mic	NotAD
rs11668832	chr19_1812481_1812981	ATP8B3	Promoter	Mic	NotAD
rs12972720	chr19_1854132_1854632	REXO1	Exonic	Mic	NotAD
rs149080927	chr19_1854132_1854632	REXO1	Exonic	Mic	NotAD
rs12974664	chr19_1856017_1856517	KLF16	Intronic	Mic	NotAD
rs144928608	chr19_44636049_44636549	PVR	Intronic	Mic	NotAD
rs8104660	chr19_44687840_44688340	CEACAM16	Distal	Mic	NotAD
rs16979372	chr19_44691968_44692468	CEACAM16	Distal	Mic	NotAD
rs186719419	chr19_44722297_44722797	CEACAM16	Distal	Mic	NotAD
rs2927487	chr19_44722297_44722797	CEACAM16	Distal	Mic	NotAD
rs150820726	chr19_44723796_44724296	BCL3	Distal	Mic	NotAD
rs2965102	chr19_44732575_44733075	BCL3	Distal	Mic	NotAD
rs56978169	chr19_44732575_44733075	BCL3	Distal	Mic	NotAD
rs77775146	chr19_44736577_44737077	BCL3	Distal	Mic	NotAD
rs1531517	chr19_44738712_44739212	BCL3	Distal	Mic	NotAD
rs4803749	chr19_44743565_44744065	BCL3	Distal	Mic	NotAD
rs749005643	chr19_44747857_44748357	BCL3	Exonic	Mic	NotAD
rs531660643	chr19_44748442_44748942	BCL3	Exonic	Mic	NotAD
rs117448417	chr19_44754800_44755300	MIR8085	Intronic	Mic	NotAD
rs189358492	chr19_44762063_44762563	MIR8085	Distal	Mic	NotAD
rs10426423	chr19_44844662_44845162	NECTIN2	Promoter	Mic	NotAD
rs41289514	chr19_44856291_44856791	NECTIN2	Intronic	Mic	NotAD
rs183610051	chr19_44856291_44856791	NECTIN2	Intronic	Mic	NotAD
rs558038882	chr19_44869413_44869913	TOMM40	Intronic	Mic	NotAD
rs138235833	chr19_44912009_44912509	APOC1	Distal	Mic	NotAD
rs547648737	chr19_44912009_44912509	APOC1	Distal	Mic	NotAD
rs72654437	chr19_44912793_44913293	APOC1	Promoter	Mic	NotAD
rs182067414	chr19_44922614_44923114	APOC1	Distal	Mic	NotAD
rs157596	chr19_44922614_44923114	APOC1	Distal	Mic	NotAD
rs157598	chr19_44923164_44923664	APOC1	Distal	Mic	NotAD
rs140526515	chr19_44924094_44924594	APOC1	Distal	Mic	NotAD
rs565334527	chr19_44925395_44925895	APOC1	Distal	Mic	NotAD
rs10424663	chr19_44925395_44925895	APOC1	Distal	Mic	NotAD
rs5112	chr19_44926997_44927497	APOC1	Distal	Mic	NotAD
rs5157	chr19_44943726_44944226	APOC4-APOC2	Intronic	Mic	NotAD
rs12721109	chr19_44943726_44944226	APOC4-APOC2	Intronic	Mic	NotAD
rs1132899	chr19_44944590_44945090	APOC2	Promoter	Mic	NotAD
rs5167	chr19_44945177_44945677	APOC2	Promoter	Mic	NotAD
rs2288912	chr19_44945722_44946222	APOC2	Promoter	Mic	NotAD
rs2288911	chr19_44945722_44946222	APOC2	Promoter	Mic	NotAD
rs9304644	chr19_44946747_44947247	APOC2	Intronic	Mic	NotAD
rs9304646	chr19_44946747_44947247	APOC2	Intronic	Mic	NotAD
rs4803774	chr19_44947248_44947748	APOC2	Intronic	Mic	NotAD
rs4803775	chr19_44947248_44947748	APOC2	Intronic	Mic	NotAD
rs5120	chr19_44948358_44948858	APOC2	Intronic	Mic	NotAD
rs12709888	chr19_44948358_44948858	APOC2	Intronic	Mic	NotAD
rs35194062	chr19_45001771_45002271	RELB	Intronic	Mic	NotAD
rs76856627	chr19_45040325_45040825	CLASRP	Exonic	Mic	NotAD
rs1560725	chr19_45040325_45040825	CLASRP	Exonic	Mic	NotAD
rs117252809	chr19_45454369_45454869	FOSB	Intronic	Mic	NotAD
rs537231770	chr19_45598323_45598823	GPR4	Intronic	Mic	NotAD
rs6064392	chr20_56409470_56409970	CASS4	Distal	Mic	NotAD
rs17462136	chr20_56411790_56412290	CASS4	Promoter	Mic	NotAD
rs73156368	chr20_56412604_56413104	CASS4	Intronic	Mic	NotAD
rs6014722	chr20_56414730_56415230	CASS4	Intronic	Mic	NotAD
rs6024870	chr20_56422396_56422896	CASS4	Intronic	Mic	NotAD
rs36138569	chr2_233152470_233152970	ATG16L1	Intronic	OPC	NotAD
rs36172244	chr2_233152470_233152970	ATG16L1	Intronic	OPC	NotAD
rs145770967	chr2_233152470_233152970	ATG16L1	Intronic	OPC	NotAD
rs36148770	chr2_233152470_233152970	ATG16L1	Intronic	OPC	NotAD
rs11728636	chr4_11021344_11021844	CLNK	Distal	OPC	NotAD
rs4959098	chr6_32415370_32415870	BTNL2	Distal	OPC	NotAD
rs34213597	chr7_99993395_99993895	AZGP1	Distal	OPC	NotAD
rs6465760	chr7_99993395_99993895	AZGP1	Distal	OPC	NotAD
rs3735242	chr7_100174198_100174698	GPC2	Exonic	OPC	NotAD
rs12705074	chr7_100176641_100177141	GPC2	Promoter	OPC	NotAD
rs751141	chr8_27516221_27516721	EPHX2	Intronic	OPC	NotAD
rs62504299	chr8_27529020_27529520	EPHX2	Intronic	OPC	NotAD
rs867231	chr8_27609847_27610347	MIR6843	Intronic	OPC	NotAD
rs9331896	chr8_27609847_27610347	MIR6843	Intronic	OPC	NotAD
rs2070926	chr8_27609847_27610347	MIR6843	Intronic	OPC	NotAD
rs1320164	chr8_94948535_94949035	TP53INP1	Intronic	OPC	NotAD
rs896853	chr8_94948535_94949035	TP53INP1	Intronic	OPC	NotAD
rs896852	chr8_94948535_94949035	TP53INP1	Intronic	OPC	NotAD
rs2879813	chr8_94948535_94949035	TP53INP1	Intronic	OPC	NotAD
rs12595312	chr15_63201959_63202459	RAB8B	Intronic	OPC	NotAD
rs12912328	chr15_63201959_63202459	RAB8B	Intronic	OPC	NotAD
rs7176597	chr15_63201959_63202459	RAB8B	Intronic	OPC	NotAD
rs9928448	chr16_30061004_30061504	ALDOA	Intronic	OPC	NotAD
rs62055950	chr17_45775514_45776014	CRHR1	Intronic	OPC	NotAD
rs56043078	chr17_45775514_45776014	CRHR1	Intronic	OPC	NotAD
rs62054846	chr17_45861215_45861715	SPPL2C	Intronic	OPC	NotAD
rs55646970	chr17_45861215_45861715	SPPL2C	Intronic	OPC	NotAD
rs55673092	chr17_45861215_45861715	SPPL2C	Intronic	OPC	NotAD
rs62055461	chr17_45863751_45864251	SPPL2C	Intronic	OPC	NotAD
rs62055462	chr17_45863751_45864251	SPPL2C	Intronic	OPC	NotAD
rs62055463	chr17_45863751_45864251	SPPL2C	Intronic	OPC	NotAD
rs77652965	chr17_45863751_45864251	SPPL2C	Intronic	OPC	NotAD
rs12150516	chr17_45867145_45867645	SPPL2C	Intronic	OPC	NotAD
rs62063670	chr17_46045553_46046053	STH	Exonic	OPC	NotAD
rs62060798	chr17_46066294_46066794	STH	Exonic	OPC	NotAD
rs17576779	chr17_46100740_46101240	KANSL1-AS1	Intronic	OPC	NotAD
rs17660488	chr17_46100740_46101240	KANSL1-AS1	Intronic	OPC	NotAD
rs112102887	chr17_46102077_46102577	KANSL1-AS1	Intronic	OPC	NotAD
rs2404781	chr1_207346561_207347061	CD55	Intronic	Oli	NotAD
rs3886100	chr1_207565476_207565976	CR1	Intronic	Oli	NotAD
rs730306	chr2_127048852_127049352	BIN1	Intronic	Oli	NotAD
rs3835781	chr2_127048852_127049352	BIN1	Intronic	Oli	NotAD
rs76414720	chr2_127053059_127053559	BIN1	Exonic	Oli	NotAD
rs77696070	chr2_127054846_127055346	BIN1	Exonic	Oli	NotAD
rs934826	chr2_127068220_127068720	BIN1	Intronic	Oli	NotAD
rs114446285	chr2_127068220_127068720	BIN1	Intronic	Oli	NotAD
rs3768858	chr2_127069038_127069538	BIN1	Intronic	Oli	NotAD
rs79491468	chr2_127069038_127069538	BIN1	Intronic	Oli	NotAD
rs78146168	chr2_127069038_127069538	BIN1	Intronic	Oli	NotAD
rs80327618	chr2_127071248_127071748	BIN1	Intronic	Oli	NotAD
rs3768857	chr2_127071248_127071748	BIN1	Intronic	Oli	NotAD
rs10194375	chr2_127081972_127082472	BIN1	Intronic	Oli	NotAD
rs35589443	chr2_127090061_127090561	BIN1	Intronic	Oli	NotAD
rs35114168	chr2_127090061_127090561	BIN1	Intronic	Oli	NotAD
rs11887884	chr2_127090061_127090561	BIN1	Intronic	Oli	NotAD
rs11682186	chr2_127103468_127103968	BIN1	Intronic	Oli	NotAD
rs4663097	chr2_127104229_127104729	BIN1	Intronic	Oli	NotAD
rs72838215	chr2_127104229_127104729	BIN1	Intronic	Oli	NotAD
rs6431219	chr2_127104229_127104729	BIN1	Intronic	Oli	NotAD
rs744368	chr2_127104762_127105262	BIN1	Intronic	Oli	NotAD
rs76516995	chr2_127107037_127107537	BIN1	Promoter	Oli	NotAD
rs78710909	chr2_127107037_127107537	BIN1	Promoter	Oli	NotAD
rs13032148	chr2_127107037_127107537	BIN1	Promoter	Oli	NotAD
rs77260225	chr2_127107037_127107537	BIN1	Promoter	Oli	NotAD
rs4494685	chr2_127109782_127110282	BIN1	Distal	Oli	NotAD
rs55646068	chr2_127111647_127112147	BIN1	Distal	Oli	NotAD
rs10182292	chr2_127111647_127112147	BIN1	Distal	Oli	NotAD
rs34555108	chr2_127115360_127115860	BIN1	Distal	Oli	NotAD
rs4663098	chr2_127115360_127115860	BIN1	Distal	Oli	NotAD
rs7557280	chr2_127115360_127115860	BIN1	Distal	Oli	NotAD
rs7594230	chr2_127115942_127116442	BIN1	Distal	Oli	NotAD
rs34745987	chr2_127117375_127117875	BIN1	Distal	Oli	NotAD
rs3845674	chr2_127117375_127117875	BIN1	Distal	Oli	NotAD
rs71414738	chr2_127118325_127118825	BIN1	Distal	Oli	NotAD
rs148380751	chr2_127120407_127120907	BIN1	Distal	Oli	NotAD
rs12986964	chr2_127120407_127120907	BIN1	Distal	Oli	NotAD
rs4663099	chr2_127120407_127120907	BIN1	Distal	Oli	NotAD
rs4663100	chr2_127120407_127120907	BIN1	Distal	Oli	NotAD
rs10929009	chr2_127120945_127121445	BIN1	Distal	Oli	NotAD
rs58570929	chr2_127121571_127122071	BIN1	Distal	Oli	NotAD
rs11904144	chr2_127122194_127122694	BIN1	Distal	Oli	NotAD
rs6431220	chr2_127122802_127123302	BIN1	Distal	Oli	NotAD
rs72838225	chr2_127122802_127123302	BIN1	Distal	Oli	NotAD
rs7559175	chr2_127125843_127126343	BIN1	Distal	Oli	NotAD
rs57724183	chr2_127125843_127126343	BIN1	Distal	Oli	NotAD
rs58682665	chr2_127127623_127128123	BIN1	Distal	Oli	NotAD
rs1583647	chr2_127127623_127128123	BIN1	Distal	Oli	NotAD
rs55828408	chr2_127127623_127128123	BIN1	Distal	Oli	NotAD
rs719054	chr2_127127623_127128123	BIN1	Distal	Oli	NotAD
rs893432	chr2_127137235_127137735	BIN1	Distal	Oli	NotAD
rs72781724	chr5_87122015_87122515	MIR4280	Intronic	Oli	NotAD
rs10267212	chr7_99997450_99997950	ZKSCAN1	Distal	Oli	NotAD
rs10267231	chr7_99997450_99997950	ZKSCAN1	Distal	Oli	NotAD
rs34256128	chr7_100004246_100004746	ZKSCAN1	Distal	Oli	NotAD
rs34031156	chr7_100080182_100080682	ZNF3	Intronic	Oli	NotAD
rs3823642	chr7_100198227_100198727	PVRIG	Exonic	Oli	NotAD
rs3735241	chr7_100198227_100198727	PVRIG	Exonic	Oli	NotAD
rs1727130	chr7_100213706_100214206	PVRIG	Intronic	Oli	NotAD
rs36019559	chr7_100216587_100217087	PVRIG	Intronic	Oli	NotAD
rs2005763	chr7_100217105_100217605	PVRIG	Intronic	Oli	NotAD
rs35358918	chr7_100217105_100217605	PVRIG	Intronic	Oli	NotAD
rs66969288	chr8_27601982_27602482	MIR6843	Intronic	Oli	NotAD
rs10097617	chr8_94949146_94949646	TP53INP1	Promoter	Oli	NotAD
rs10108430	chr8_94949146_94949646	TP53INP1	Promoter	Oli	NotAD
rs7003387	chr8_94949671_94950171	TP53INP1	Promoter	Oli	NotAD
rs10838709	chr11_47425624_47426124	PSMC3	Exonic	Oli	NotAD
rs10897011	chr11_60193551_60194051	MS4A6A	Distal	Oli	NotAD
rs11230180	chr11_60193551_60194051	MS4A6A	Distal	Oli	NotAD
rs598561	chr11_85941320_85941820	CCDC83	Distal	Oli	NotAD
rs10687788	chr11_86044455_86044955	PICALM	Intronic	Oli	NotAD
rs56090012	chr11_86055083_86055583	PICALM	Intronic	Oli	NotAD
rs9804630	chr11_86055083_86055583	PICALM	Intronic	Oli	NotAD
rs586274	chr11_86102969_86103469	PICALM	Distal	Oli	NotAD
rs1237999	chr11_86103837_86104337	PICALM	Distal	Oli	NotAD
rs10792830	chr11_86127697_86128197	PICALM	Distal	Oli	NotAD
rs10501610	chr11_86133233_86133733	PICALM	Distal	Oli	NotAD
rs11234552	chr11_86134882_86135382	PICALM	Distal	Oli	NotAD
rs7110631	chr11_86144957_86145457	PICALM	Distal	Oli	NotAD
rs10751134	chr11_86147705_86148205	PICALM	Distal	Oli	NotAD
rs10898439	chr11_86148432_86148932	PICALM	Distal	Oli	NotAD
rs10898440	chr11_86148432_86148932	PICALM	Distal	Oli	NotAD
rs9787874	chr11_86149039_86149539	PICALM	Distal	Oli	NotAD
rs56295979	chr11_86150211_86150711	PICALM	Distal	Oli	NotAD
rs7480193	chr11_86150211_86150711	PICALM	Distal	Oli	NotAD
rs72962020	chr11_86151668_86152168	PICALM	Distal	Oli	NotAD
rs56157503	chr11_86151668_86152168	PICALM	Distal	Oli	NotAD
rs11234562	chr11_86152550_86153050	PICALM	Distal	Oli	NotAD
rs2009833	chr15_49901328_49901828	DTWD1	Intronic	Oli	NotAD
rs1427281	chr15_58666883_58667383	ADAM10	Intronic	Oli	NotAD
rs2250583	chr15_58758085_58758585	ADAM10	Distal	Oli	NotAD
rs77318561	chr17_5281021_5281521	RABEP1	Promoter	Oli	NotAD
rs76253980	chr17_5305952_5306452	RABEP1	Intronic	Oli	NotAD
rs4341787	chr17_45824985_45825485	SPPL2C	Intronic	Oli	NotAD
rs4523962	chr17_45824985_45825485	SPPL2C	Intronic	Oli	NotAD
rs3885074	chr17_45824985_45825485	SPPL2C	Intronic	Oli	NotAD
rs3885075	chr17_45824985_45825485	SPPL2C	Intronic	Oli	NotAD
rs41280116	chr17_45824985_45825485	SPPL2C	Intronic	Oli	NotAD
rs62057147	chr17_45825724_45826224	SPPL2C	Exonic	Oli	NotAD
rs62057148	chr17_45825724_45826224	SPPL2C	Exonic	Oli	NotAD
rs62057149	chr17_45825724_45826224	SPPL2C	Exonic	Oli	NotAD
rs62057150	chr17_45825724_45826224	SPPL2C	Exonic	Oli	NotAD
rs62057152	chr17_45826311_45826811	SPPL2C	Exonic	Oli	NotAD
rs62057153	chr17_45827038_45827538	SPPL2C	Intronic	Oli	NotAD
rs62057154	chr17_45827038_45827538	SPPL2C	Intronic	Oli	NotAD
rs62057155	chr17_45827038_45827538	SPPL2C	Intronic	Oli	NotAD
rs62057156	chr17_45827577_45828077	SPPL2C	Exonic	Oli	NotAD
rs78872653	chr17_45827577_45828077	SPPL2C	Exonic	Oli	NotAD
rs62057157	chr17_45827577_45828077	SPPL2C	Exonic	Oli	NotAD
rs56113217	chr17_45849401_45849901	SPPL2C	Intronic	Oli	NotAD
rs56269136	chr17_45849401_45849901	SPPL2C	Intronic	Oli	NotAD
rs62055465	chr17_45864533_45865033	SPPL2C	Intronic	Oli	NotAD
rs62055466	chr17_45865136_45865636	SPPL2C	Intronic	Oli	NotAD
rs62055467	chr17_45865136_45865636	SPPL2C	Intronic	Oli	NotAD
rs62055468	chr17_45865136_45865636	SPPL2C	Intronic	Oli	NotAD
rs62055469	chr17_45865960_45866460	SPPL2C	Intronic	Oli	NotAD
rs62055470	chr17_45865960_45866460	SPPL2C	Intronic	Oli	NotAD
rs62055471	chr17_45865960_45866460	SPPL2C	Intronic	Oli	NotAD
rs56327054	chr17_45866568_45867068	SPPL2C	Intronic	Oli	NotAD
rs56036719	chr17_45866568_45867068	SPPL2C	Intronic	Oli	NotAD
rs55781174	chr17_45866568_45867068	SPPL2C	Intronic	Oli	NotAD
rs12150223	chr17_45866568_45867068	SPPL2C	Intronic	Oli	NotAD
rs62055475	chr17_45867691_45868191	SPPL2C	Intronic	Oli	NotAD
rs62055476	chr17_45867691_45868191	SPPL2C	Intronic	Oli	NotAD
rs62055477	chr17_45868250_45868750	SPPL2C	Intronic	Oli	NotAD
rs78637438	chr17_45868250_45868750	SPPL2C	Intronic	Oli	NotAD
rs2316771	chr17_45868250_45868750	SPPL2C	Intronic	Oli	NotAD
rs62055478	chr17_45868250_45868750	SPPL2C	Intronic	Oli	NotAD
rs1078830	chr17_45868250_45868750	SPPL2C	Intronic	Oli	NotAD
rs56194412	chr17_45883019_45883519	MAPT	Intronic	Oli	NotAD
rs56338487	chr17_45883019_45883519	MAPT	Intronic	Oli	NotAD
rs17564020	chr17_45914309_45914809	MAPT-IT1	Intronic	Oli	NotAD
rs55682376	chr17_45914309_45914809	MAPT-IT1	Intronic	Oli	NotAD
rs62061720	chr17_45935774_45936274	MAPT-IT1	Intronic	Oli	NotAD
rs62061721	chr17_45935774_45936274	MAPT-IT1	Intronic	Oli	NotAD
rs79857651	chr17_45935774_45936274	MAPT-IT1	Intronic	Oli	NotAD
rs113756354	chr17_45935774_45936274	MAPT-IT1	Intronic	Oli	NotAD
rs62061727	chr17_45939557_45940057	MAPT-IT1	Intronic	Oli	NotAD
rs62061728	chr17_45939557_45940057	MAPT-IT1	Intronic	Oli	NotAD
rs62061729	chr17_45939557_45940057	MAPT-IT1	Intronic	Oli	NotAD
rs62061730	chr17_45939557_45940057	MAPT-IT1	Intronic	Oli	NotAD
rs62061731	chr17_45940263_45940763	MAPT-IT1	Intronic	Oli	NotAD
rs62061732	chr17_45940263_45940763	MAPT-IT1	Intronic	Oli	NotAD
rs62062768	chr17_45941732_45942232	MAPT-IT1	Intronic	Oli	NotAD
rs62062771	chr17_45942853_45943353	MAPT-IT1	Intronic	Oli	NotAD
rs62062772	chr17_45942853_45943353	MAPT-IT1	Intronic	Oli	NotAD
rs62062773	chr17_45942853_45943353	MAPT-IT1	Intronic	Oli	NotAD
rs79115768	chr17_45943461_45943961	MAPT-IT1	Intronic	Oli	NotAD
rs28416808	chr17_45943461_45943961	MAPT-IT1	Intronic	Oli	NotAD
rs2316784	chr17_45944109_45944609	MAPT-IT1	Intronic	Oli	NotAD
rs4327091	chr17_45944109_45944609	MAPT-IT1	Intronic	Oli	NotAD
rs4479290	chr17_45944109_45944609	MAPT-IT1	Intronic	Oli	NotAD
rs62062783	chr17_45946089_45946589	MAPT-IT1	Intronic	Oli	NotAD
rs74903707	chr17_45950846_45951346	STH	Intronic	Oli	NotAD
rs77017444	chr17_45951381_45951881	STH	Intronic	Oli	NotAD
rs76839282	chr17_45951381_45951881	STH	Intronic	Oli	NotAD
rs17651285	chr17_45976831_45977331	STH	Exonic	Oli	NotAD
rs17572467	chr17_45976831_45977331	STH	Exonic	Oli	NotAD
rs17572495	chr17_45976831_45977331	STH	Exonic	Oli	NotAD
rs62063779	chr17_45976831_45977331	STH	Exonic	Oli	NotAD
rs62062270	chr17_46013767_46014267	STH	Intronic	Oli	NotAD
rs1468240	chr17_46118857_46119357	KANSL1-AS1	Intronic	Oli	NotAD
rs12975656	chr19_1833542_1834042	LOC100288123	Intronic	Oli	NotAD
rs11669170	chr19_1833542_1834042	LOC100288123	Intronic	Oli	NotAD
rs7257468	chr19_44949735_44950235	APOC2	Distal	Oli	NotAD
rs7258345	chr19_44949735_44950235	APOC2	Distal	Oli	NotAD
rs7257476	chr19_44949735_44950235	APOC2	Distal	Oli	NotAD
rs12709889	chr19_44949735_44950235	APOC2	Distal	Oli	NotAD
rs117612135	chr19_45001114_45001614	RELB	Promoter	Oli	NotAD
rs112481437	chr19_45045808_45046308	CLASRP	Intronic	Oli	NotAD
rs5843211	chr21_26118523_26119023	APP	Intronic	Oli	NotAD
rs4575098	chr1_161185252_161185752	B4GALT3	Exonic	Inh	NotAD
rs143080277	chr2_105749414_105749914	NCK2	Intronic	Inh	NotAD
rs755951	chr8_27368779_27369279	PTK2B	Intronic	Inh	NotAD
rs35505579	chr8_27479033_27479533	CHRNA2	Exonic	Inh	NotAD
rs7341557	chr8_27545029_27545529	EPHX2	Exonic	Inh	NotAD
rs2640724	chr8_27557898_27558398	MIR6843	Distal	Inh	NotAD
rs1800978	chr9_104903654_104904154	ABCA1	Intronic	Inh	NotAD
rs1799777	chr9_104903654_104904154	ABCA1	Intronic	Inh	NotAD
rs7920721	chr10_11678082_11678582	ECHDC3	Distal	Inh	NotAD
rs199528	chr17_46765657_46766157	WNT3	Intronic	Inh	NotAD
rs4362	chr17_63495971_63496471	ACE	Exonic	Inh	NotAD
rs10420920	chr19_44648536_44649036	PVR	Intronic	Inh	NotAD
rs200323909	chr19_44772854_44773354	CBLC	Distal	Inh	NotAD
rs411856	chr19_44861034_44861534	NECTIN2	Intronic	Inh	NotAD
rs395683	chr19_44861034_44861534	NECTIN2	Intronic	Inh	NotAD
rs536518226	chr19_45137067_45137567	NKPD1	Intronic	Inh	NotAD
rs17014923	chr2_127084212_127084712	BIN1	Intronic	Ext	NotAD
rs58402148	chr2_127084212_127084712	BIN1	Intronic	Ext	NotAD
rs11693422	chr2_127084212_127084712	BIN1	Intronic	Ext	NotAD
rs36129046	chr2_233150743_233151243	ATG16L1	Intronic	Ext	NotAD
rs139207110	chr2_233150743_233151243	ATG16L1	Intronic	Ext	NotAD
rs142339885	chr2_233150743_233151243	ATG16L1	Intronic	Ext	NotAD
rs150521622	chr2_233150743_233151243	ATG16L1	Intronic	Ext	NotAD
rs149754149	chr2_233150743_233151243	ATG16L1	Intronic	Ext	NotAD
rs36146561	chr2_233150743_233151243	ATG16L1	Intronic	Ext	NotAD
rs4690197	chr4_960155_960655	DGKQ	Exonic	Ext	NotAD
rs3733347	chr4_960155_960655	DGKQ	Exonic	Ext	NotAD
rs143202663	chr6_40897329_40897829	TSPO2	Distal	Ext	NotAD
rs35575787	chr8_27329778_27330278	PTK2B	Intronic	Ext	NotAD
rs79145239	chr8_27461850_27462350	CHRNA2	Intronic	Ext	NotAD
rs4934083	chr10_80356490_80356990	DYDC1	Promoter	Ext	NotAD
rs7082705	chr10_80410729_80411229	PRXL2A	Intronic	Ext	NotAD
rs7086627	chr10_80460722_80461222	TSPAN14	Intronic	Ext	NotAD
rs7900536	chr10_80493536_80494036	TSPAN14	Intronic	Ext	NotAD
rs2293576	chr11_47413235_47413735	SLC39A13	Exonic	Ext	NotAD
rs2458499	chr11_85948680_85949180	CCDC83	Distal	Ext	NotAD
rs987482	chr11_121494727_121495227	SORL1	Intronic	Ext	NotAD
rs12928610	chr16_30004553_30005053	HIRIP3	Intronic	Ext	NotAD
rs12325400	chr16_30012098_30012598	DOC2A	Exonic	Ext	NotAD
rs12598856	chr16_30017948_30018448	DOC2A	Intronic	Ext	NotAD
rs11642612	chr16_30018474_30018974	DOC2A	Intronic	Ext	NotAD
rs8056564	chr16_81946259_81946759	SDR42E1	Intronic	Ext	NotAD
rs59587437	chr17_5326457_5326957	RABEP1	Intronic	Ext	NotAD
rs968028	chr17_45703336_45703836	LINC02210	Intronic	Ext	NotAD
rs62056913	chr17_45707608_45708108	LINC02210	Intronic	Ext	NotAD
rs75104593	chr17_45835988_45836488	SPPL2C	Intronic	Ext	NotAD
rs74998289	chr17_45835988_45836488	SPPL2C	Intronic	Ext	NotAD
rs80346216	chr17_45897065_45897565	MAPT-IT1	Promoter	Ext	NotAD
rs76632685	chr17_45897065_45897565	MAPT-IT1	Promoter	Ext	NotAD
rs62056783	chr17_45897065_45897565	MAPT-IT1	Promoter	Ext	NotAD
rs62056784	chr17_45897065_45897565	MAPT-IT1	Promoter	Ext	NotAD
rs62056785	chr17_45897851_45898351	MAPT-IT1	Exonic	Ext	NotAD
rs62056786	chr17_45897851_45898351	MAPT-IT1	Exonic	Ext	NotAD
rs62056789	chr17_45897851_45898351	MAPT-IT1	Exonic	Ext	NotAD
rs62056790	chr17_45897851_45898351	MAPT-IT1	Exonic	Ext	NotAD
rs62056804	chr17_45904816_45905316	MAPT-IT1	Intronic	Ext	NotAD
rs1467966	chr17_45907005_45907505	MAPT-IT1	Intronic	Ext	NotAD
rs62056808	chr17_45907005_45907505	MAPT-IT1	Intronic	Ext	NotAD
rs62056809	chr17_45907005_45907505	MAPT-IT1	Intronic	Ext	NotAD
rs62056810	chr17_45907005_45907505	MAPT-IT1	Intronic	Ext	NotAD
rs79492906	chr17_45907005_45907505	MAPT-IT1	Intronic	Ext	NotAD
rs74509629	chr17_45907911_45908411	MAPT-IT1	Intronic	Ext	NotAD
rs79290980	chr17_45907911_45908411	MAPT-IT1	Intronic	Ext	NotAD
rs1467968	chr17_45908971_45909471	MAPT-IT1	Intronic	Ext	NotAD
rs4371195	chr17_45908971_45909471	MAPT-IT1	Intronic	Ext	NotAD
rs12150125	chr17_45908971_45909471	MAPT-IT1	Intronic	Ext	NotAD
rs12150527	chr17_45908971_45909471	MAPT-IT1	Intronic	Ext	NotAD
rs7502888	chr17_45909536_45910036	MAPT-IT1	Intronic	Ext	NotAD
rs62056812	chr17_45909536_45910036	MAPT-IT1	Intronic	Ext	NotAD
rs62063276	chr17_45958981_45959481	STH	Intronic	Ext	NotAD
rs62063277	chr17_45958981_45959481	STH	Intronic	Ext	NotAD
rs17650818	chr17_45958981_45959481	STH	Intronic	Ext	NotAD
rs62063291	chr17_45965868_45966368	STH	Intronic	Ext	NotAD
rs62063292	chr17_45965868_45966368	STH	Intronic	Ext	NotAD
rs62063850	chr17_45996252_45996752	STH	Exonic	Ext	NotAD
rs1052553	chr17_45996252_45996752	STH	Exonic	Ext	NotAD
rs17652121	chr17_45996252_45996752	STH	Exonic	Ext	NotAD
rs62063852	chr17_45997168_45997668	STH	Promoter	Ext	NotAD
rs62063853	chr17_45997168_45997668	STH	Promoter	Ext	NotAD
rs62063854	chr17_45997168_45997668	STH	Promoter	Ext	NotAD
rs12150090	chr17_46038369_46038869	STH	Exonic	Ext	NotAD
rs17575423	chr17_46051843_46052343	STH	Intronic	Ext	NotAD
rs17660398	chr17_46092970_46093470	STH	Intronic	Ext	NotAD
rs12150320	chr17_46135820_46136320	KANSL1-AS1	Intronic	Ext	NotAD
rs199498	chr17_46787922_46788422	WNT3	Intronic	Ext	NotAD
rs4291	chr17_63476575_63477075	ACE	Promoter	Ext	NotAD
rs4292	chr17_63476575_63477075	ACE	Promoter	Ext	NotAD
rs4295	chr17_63478813_63479313	ACE	Exonic	Ext	NotAD
rs4351	chr17_63492158_63492658	ACE	Intronic	Ext	NotAD
rs10417824	chr19_1009364_1009864	GRIN3B	Exonic	Ext	NotAD
rs11670146	chr19_1847260_1847760	REXO1	Intronic	Ext	NotAD
rs147491548	chr19_44968083_44968583	CLPTM1	Intronic	Ext	NotAD
rs16979586	chr19_44968083_44968583	CLPTM1	Intronic	Ext	NotAD
rs59136988	chr19_44968747_44969247	CLPTM1	Intronic	Ext	NotAD
rs10408847	chr19_45131248_45131748	NKPD1	Intronic	Ext	NotAD
rs79018068	chr19_45131248_45131748	NKPD1	Intronic	Ext	NotAD
rs181779730	chr19_45146168_45146668	NKPD1	Exonic	Ext	NotAD
rs78073763	chr19_45146168_45146668	NKPD1	Exonic	Ext	NotAD
rs74846209	chr19_45146718_45147218	NKPD1	Exonic	Ext	NotAD
rs1048699	chr19_45146718_45147218	NKPD1	Exonic	Ext	NotAD
rs6069749	chr20_56446458_56446958	RTF2	Intronic	Ext	NotAD
rs10207628	chr2_127094126_127094626	BIN1	Intronic	Ast	LowAD
rs10207708	chr2_127094126_127094626	BIN1	Intronic	Ast	LowAD
rs4959098	chr6_32415373_32415873	BTNL2	Distal	Ast	LowAD
rs74504435	chr7_54881354_54881854	SEC61G	Distal	Ast	LowAD
rs12539172	chr7_100493866_100494366	NYAP1	Exonic	Ast	LowAD
rs10101779	chr8_27592839_27593339	MIR6843	Distal	Ast	LowAD
rs10088244	chr8_27593942_27594442	MIR6843	Distal	Ast	LowAD
rs10091215	chr8_27593942_27594442	MIR6843	Distal	Ast	LowAD
rs7817366	chr8_27593942_27594442	MIR6843	Distal	Ast	LowAD
rs35598594	chr8_27594722_27595222	MIR6843	Distal	Ast	LowAD
rs10092082	chr8_27594722_27595222	MIR6843	Distal	Ast	LowAD
rs9331931	chr8_27600096_27600596	MIR6843	Intronic	Ast	LowAD
rs9331930	chr8_27600760_27601260	MIR6843	Intronic	Ast	LowAD
rs66969288	chr8_27601983_27602483	MIR6843	Intronic	Ast	LowAD
rs9331928	chr8_27602840_27603340	MIR6843	Intronic	Ast	LowAD
rs28541694	chr8_27604344_27604844	MIR6843	Intronic	Ast	LowAD
rs9331908	chr8_27606087_27606587	MIR6843	Intronic	Ast	LowAD
rs9331905	chr8_27606672_27607172	MIR6843	Intronic	Ast	LowAD
rs11136000	chr8_27606672_27607172	MIR6843	Intronic	Ast	LowAD
rs1532276	chr8_27608629_27609129	MIR6843	Exonic	Ast	LowAD
rs1532277	chr8_27608629_27609129	MIR6843	Exonic	Ast	LowAD
rs1532278	chr8_27608629_27609129	MIR6843	Exonic	Ast	LowAD
rs867232	chr8_27609356_27609856	MIR6843	Intronic	Ast	LowAD
rs9331896	chr8_27609887_27610387	MIR6843	Intronic	Ast	LowAD
rs2070926	chr8_27609887_27610387	MIR6843	Intronic	Ast	LowAD
rs17515931	chr8_27612531_27613031	MIR6843	Intronic	Ast	LowAD
rs73231005	chr8_27613094_27613594	CLU	Intronic	Ast	LowAD
rs530324	chr8_27633581_27634081	SCARA3	Promoter	Ast	LowAD
rs138529507	chr8_27636427_27636927	SCARA3	Intronic	Ast	LowAD
rs896853	chr8_94948578_94949078	TP53INP1	Intronic	Ast	LowAD
rs896852	chr8_94948578_94949078	TP53INP1	Intronic	Ast	LowAD
rs2879813	chr8_94948578_94949078	TP53INP1	Intronic	Ast	LowAD
rs1693551	chr8_100663220_100663720	SNX31	Promoter	Ast	LowAD
rs567075	chr11_86119020_86119520	PICALM	Distal	Ast	LowAD
rs60228070	chr11_121487181_121487681	SORL1	Intronic	Ast	LowAD
rs1784920	chr11_121566468_121566968	SORL1	Intronic	Ast	LowAD
rs12435704	chr14_52879734_52880234	FERMT2	Intronic	Ast	LowAD
rs7149638	chr14_52879734_52880234	FERMT2	Intronic	Ast	LowAD
rs11858666	chr15_63233728_63234228	APH1B	Intronic	Ast	LowAD
rs35763222	chr15_63348881_63349381	CA12	Intronic	Ast	LowAD
rs58217768	chr16_29992336_29992836	INO80E	Exonic	Ast	LowAD
rs11642740	chr16_30049143_30049643	FAM57B	Intronic	Ast	LowAD
rs75828101	chr17_4834553_4835053	MINK1	Intronic	Ast	LowAD
rs55996632	chr17_45858185_45858685	SPPL2C	Intronic	Ast	LowAD
rs55886302	chr17_45858185_45858685	SPPL2C	Intronic	Ast	LowAD
rs1864324	chr17_45899862_45900362	MAPT-IT1	Intronic	Ast	LowAD
rs1864325	chr17_45900428_45900928	MAPT-IT1	Intronic	Ast	LowAD
rs62056795	chr17_45900428_45900928	MAPT-IT1	Intronic	Ast	LowAD
rs62056796	chr17_45900428_45900928	MAPT-IT1	Intronic	Ast	LowAD
rs79115768	chr17_45943483_45943983	MAPT-IT1	Intronic	Ast	LowAD
rs28416808	chr17_45943483_45943983	MAPT-IT1	Intronic	Ast	LowAD
rs62062784	chr17_45946917_45947417	MAPT-IT1	Intronic	Ast	LowAD
rs62062785	chr17_45946917_45947417	MAPT-IT1	Intronic	Ast	LowAD
rs62062786	chr17_45946917_45947417	MAPT-IT1	Intronic	Ast	LowAD
rs62062794	chr17_45948987_45949487	STH	Intronic	Ast	LowAD
rs242561	chr17_45948987_45949487	STH	Intronic	Ast	LowAD
rs62063775	chr17_45973249_45973749	STH	Exonic	Ast	LowAD
rs62063776	chr17_45973249_45973749	STH	Exonic	Ast	LowAD
rs117124984	chr17_45973895_45974395	STH	Exonic	Ast	LowAD
rs118087478	chr17_45973895_45974395	STH	Exonic	Ast	LowAD
rs77875796	chr17_45973895_45974395	STH	Exonic	Ast	LowAD
rs62063777	chr17_45975579_45976079	STH	Exonic	Ast	LowAD
rs1052551	chr17_45991443_45991943	STH	Intronic	Ast	LowAD
rs62063799	chr17_45991443_45991943	STH	Intronic	Ast	LowAD
rs62063800	chr17_45991443_45991943	STH	Intronic	Ast	LowAD
rs17651857	chr17_45992064_45992564	STH	Intronic	Ast	LowAD
rs74759276	chr17_45992064_45992564	STH	Intronic	Ast	LowAD
rs17651887	chr17_45992064_45992564	STH	Intronic	Ast	LowAD
rs62064664	chr17_46003906_46004406	STH	Intronic	Ast	LowAD
rs62064665	chr17_46003906_46004406	STH	Intronic	Ast	LowAD
rs111324579	chr17_46004412_46004912	STH	Intronic	Ast	LowAD
rs113201171	chr17_46004412_46004912	STH	Intronic	Ast	LowAD
rs62060785	chr17_46059257_46059757	STH	Intronic	Ast	LowAD
rs62060786	chr17_46059257_46059757	STH	Intronic	Ast	LowAD
rs62060787	chr17_46059257_46059757	STH	Intronic	Ast	LowAD
rs41384744	chr17_46059257_46059757	STH	Intronic	Ast	LowAD
rs2532308	chr17_46143538_46144038	KANSL1-AS1	Intronic	Ast	LowAD
rs2532307	chr17_46143538_46144038	KANSL1-AS1	Intronic	Ast	LowAD
rs12975656	chr19_1833529_1834029	LOC100288123	Intronic	Ast	LowAD
rs56198711	chr19_44717992_44718492	CEACAM16	Distal	Ast	LowAD
rs73037426	chr19_44719147_44719647	CEACAM16	Distal	Ast	LowAD
rs4802235	chr19_44721223_44721723	CEACAM16	Distal	Ast	LowAD
rs7257231	chr19_44748845_44749345	BCL3	Intronic	Ast	LowAD
rs187010311	chr19_44774607_44775107	CBLC	Distal	Ast	LowAD
rs569705402	chr19_44784306_44784806	CBLC	Intronic	Ast	LowAD
rs574578352	chr19_44796650_44797150	BCAM	Intronic	Ast	LowAD
rs73048258	chr19_44807881_44808381	BCAM	Promoter	Ast	LowAD
rs149626525	chr19_44807881_44808381	BCAM	Promoter	Ast	LowAD
rs560898656	chr19_44807881_44808381	BCAM	Promoter	Ast	LowAD
rs549854089	chr19_44903545_44904045	APOE	Promoter	Ast	LowAD
rs435380	chr19_44903545_44904045	APOE	Promoter	Ast	LowAD
rs446037	chr19_44904117_44904617	APOE	Promoter	Ast	LowAD
rs434132	chr19_44904117_44904617	APOE	Promoter	Ast	LowAD
rs769452	chr19_44907573_44908073	APOE	Exonic	Ast	LowAD
rs747519137	chr19_44909177_44909677	APOE	Distal	Ast	LowAD
rs537741299	chr19_44909177_44909677	APOE	Distal	Ast	LowAD
rs1081106	chr19_44909754_44910254	APOE	Distal	Ast	LowAD
rs114448690	chr19_44927720_44928220	APOC1	Distal	Ast	LowAD
rs10402642	chr19_44950455_44950955	CLPTM1	Distal	Ast	LowAD
rs7248162	chr19_44951250_44951750	CLPTM1	Distal	Ast	LowAD
rs7247227	chr19_44951250_44951750	CLPTM1	Distal	Ast	LowAD
rs7247551	chr19_44951250_44951750	CLPTM1	Distal	Ast	LowAD
rs1882752	chr19_44958019_44958519	CLPTM1	Intronic	Ast	LowAD
rs11669173	chr19_44989108_44989608	RELB	Intronic	Ast	LowAD
rs117034857	chr19_45455573_45456073	FOSB	Intronic	Ast	LowAD
rs927174	chr20_56439989_56440489	CASS4	Intronic	Ast	LowAD
rs11585858	chr1_161185955_161186455	B4GALT3	Exonic	Mic	LowAD
rs2070901	chr1_161215007_161215507	FCER1G	Promoter	Mic	LowAD
rs2070902	chr1_161217850_161218350	FCER1G	Intronic	Mic	LowAD
rs749007	chr2_127102036_127102536	BIN1	Intronic	Mic	LowAD
rs749006	chr2_127102036_127102536	BIN1	Intronic	Mic	LowAD
rs36085158	chr2_127111937_127112437	BIN1	Distal	Mic	LowAD
rs13025717	chr2_127128374_127128874	BIN1	Distal	Mic	LowAD
rs13025765	chr2_127128374_127128874	BIN1	Distal	Mic	LowAD
rs12618593	chr2_127128374_127128874	BIN1	Distal	Mic	LowAD
rs12617835	chr2_127128374_127128874	BIN1	Distal	Mic	LowAD
rs113112754	chr2_127132790_127133290	BIN1	Distal	Mic	LowAD
rs4663104	chr2_127132790_127133290	BIN1	Distal	Mic	LowAD
rs35968837	chr2_127133313_127133813	BIN1	Distal	Mic	LowAD
rs34546266	chr2_127133313_127133813	BIN1	Distal	Mic	LowAD
rs60572885	chr2_127133313_127133813	BIN1	Distal	Mic	LowAD
rs56193035	chr2_127133313_127133813	BIN1	Distal	Mic	LowAD
rs57109420	chr2_127133313_127133813	BIN1	Distal	Mic	LowAD
rs59253801	chr2_127133855_127134355	BIN1	Distal	Mic	LowAD
rs59176034	chr2_127133855_127134355	BIN1	Distal	Mic	LowAD
rs72838284	chr2_127133855_127134355	BIN1	Distal	Mic	LowAD
rs72838285	chr2_127133855_127134355	BIN1	Distal	Mic	LowAD
rs34779859	chr2_127135119_127135619	BIN1	Distal	Mic	LowAD
rs6733839	chr2_127135119_127135619	BIN1	Distal	Mic	LowAD
rs72838287	chr2_127135119_127135619	BIN1	Distal	Mic	LowAD
rs72838288	chr2_127135119_127135619	BIN1	Distal	Mic	LowAD
rs745717	chr2_127135968_127136468	BIN1	Distal	Mic	LowAD
rs56368748	chr2_127136507_127137007	BIN1	Distal	Mic	LowAD
rs730482	chr2_127136507_127137007	BIN1	Distal	Mic	LowAD
rs6705834	chr2_233113010_233113510	INPP5D	Intronic	Mic	LowAD
rs6605277	chr2_233113010_233113510	INPP5D	Intronic	Mic	LowAD
rs7569598	chr2_233116290_233116790	INPP5D	Intronic	Mic	LowAD
rs10933431	chr2_233116931_233117431	INPP5D	Intronic	Mic	LowAD
rs10933432	chr2_233116931_233117431	INPP5D	Intronic	Mic	LowAD
rs6715767	chr2_233165881_233166381	ATG16L1	Intronic	Mic	LowAD
rs61367113	chr5_86967058_86967558	LOC101929380	Promoter	Mic	LowAD
rs62375391	chr5_86997567_86998067	LOC101929380	Intronic	Mic	LowAD
rs62375397	chr5_87002382_87002882	LOC101929380	Intronic	Mic	LowAD
rs58233521	chr5_87079840_87080340	MIR4280	Intronic	Mic	LowAD
rs113706587	chr5_180200948_180201448	RASGEF1C	Intronic	Mic	LowAD
rs114841132	chr5_180207523_180208023	RASGEF1C	Intronic	Mic	LowAD
rs9268521	chr6_32413387_32413887	BTNL2	Distal	Mic	LowAD
rs9268522	chr6_32413387_32413887	BTNL2	Distal	Mic	LowAD
rs9268627	chr6_32438003_32438503	HLA-DRA	Promoter	Mic	LowAD
rs7773030	chr6_32473375_32473875	HLA-DRA	Distal	Mic	LowAD
rs614348	chr6_32606079_32606579	HLA-DRB1	Distal	Mic	LowAD
rs2760994	chr6_32606079_32606579	HLA-DRB1	Distal	Mic	LowAD
rs535852	chr6_32609769_32610269	HLA-DRB1	Distal	Mic	LowAD
rs532965	chr6_32609769_32610269	HLA-DRB1	Distal	Mic	LowAD
rs510205	chr6_32616480_32616980	HLA-DQA1	Distal	Mic	LowAD
rs9271579	chr6_32622384_32622884	HLA-DQA1	Distal	Mic	LowAD
rs9271580	chr6_32622384_32622884	HLA-DQA1	Distal	Mic	LowAD
rs9271608	chr6_32623584_32624084	HLA-DQA1	Distal	Mic	LowAD
rs9275206	chr6_32689661_32690161	HLA-DQB1	Distal	Mic	LowAD
rs9275207	chr6_32689661_32690161	HLA-DQB1	Distal	Mic	LowAD
rs9275211	chr6_32689661_32690161	HLA-DQB1	Distal	Mic	LowAD
rs9275213	chr6_32690184_32690684	HLA-DQB1	Distal	Mic	LowAD
rs9275223	chr6_32691966_32692466	HLA-DQB1	Distal	Mic	LowAD
rs2858331	chr6_32713160_32713660	HLA-DQA2	Distal	Mic	LowAD
rs143332484	chr6_41161240_41161740	TREM2	Exonic	Mic	LowAD
rs75932628	chr6_41161240_41161740	TREM2	Exonic	Mic	LowAD
rs9357347	chr6_41182783_41183283	TREML2	Distal	Mic	LowAD
rs3800342	chr6_41191538_41192038	TREML2	Exonic	Mic	LowAD
rs4714447	chr6_41271778_41272278	TREM1	Distal	Mic	LowAD
rs9381562	chr6_47461758_47462258	CD2AP	Distal	Mic	LowAD
rs9648346	chr7_28120258_28120758	JAZF1-AS1	Intronic	Mic	LowAD
rs13230744	chr7_100199904_100200404	PVRIG	Exonic	Mic	LowAD
rs2405442	chr7_100373220_100373720	PILRA	Exonic	Mic	LowAD
rs1859788	chr7_100373787_100374287	PILRA	Intronic	Mic	LowAD
rs10255133	chr7_100384595_100385095	PILRA	Intronic	Mic	LowAD
rs12703526	chr7_143410392_143410892	EPHA1	Promoter	Mic	LowAD
rs11762262	chr7_143410392_143410892	EPHA1	Promoter	Mic	LowAD
rs11769559	chr7_143414027_143414527	EPHA1	Intronic	Mic	LowAD
rs13265352	chr8_27390880_27391380	MIR6842	Intronic	Mic	LowAD
rs2279590	chr8_27598453_27598953	MIR6843	Exonic	Mic	LowAD
rs61366982	chr8_27598453_27598953	MIR6843	Exonic	Mic	LowAD
rs10097617	chr8_94949151_94949651	TP53INP1	Promoter	Mic	LowAD
rs10108430	chr8_94949151_94949651	TP53INP1	Promoter	Mic	LowAD
rs1693568	chr8_100665056_100665556	SNX31	Promoter	Mic	LowAD
rs11257238	chr10_11675134_11675634	USP6NL	Distal	Mic	LowAD
rs10761426	chr10_59980249_59980749	LINC01553	Distal	Mic	LowAD
rs2486302	chr10_80316641_80317141	MAT1A	Distal	Mic	LowAD
rs4934169	chr10_80443564_80444064	TSPAN14	Distal	Mic	LowAD
rs7896832	chr10_80497696_80498196	LOC101929574	Intronic	Mic	LowAD
rs9633740	chr10_80505490_80505990	LOC101929574	Intronic	Mic	LowAD
rs1870148	chr10_80511322_80511822	LOC101929574	Intronic	Mic	LowAD
rs7096909	chr10_80524418_80524918	LOC101929574	Exonic	Mic	LowAD
rs10838702	chr11_47389003_47389503	SPI1	Distal	Mic	LowAD
rs1377416	chr11_47394779_47395279	MIR4487	Distal	Mic	LowAD
rs10769263	chr11_47395455_47395955	MIR4487	Distal	Mic	LowAD
rs17602572	chr11_60180692_60181192	MS4A6A	Exonic	Mic	LowAD
rs632185	chr11_60183742_60184242	MS4A6A	Intronic	Mic	LowAD
rs55661415	chr11_60184429_60184929	MS4A6A	Promoter	Mic	LowAD
rs1820430	chr11_60185799_60186299	MS4A6A	Promoter	Mic	LowAD
rs10897011	chr11_60193594_60194094	MS4A6A	Distal	Mic	LowAD
rs11230180	chr11_60193594_60194094	MS4A6A	Distal	Mic	LowAD
rs718376	chr11_60235265_60235765	MIR6503	Distal	Mic	LowAD
rs34862992	chr11_60251406_60251906	MS4A4A	Distal	Mic	LowAD
rs636317	chr11_60251406_60251906	MS4A4A	Distal	Mic	LowAD
rs636341	chr11_60251406_60251906	MS4A4A	Distal	Mic	LowAD
rs672399	chr11_60252623_60253123	MS4A4A	Distal	Mic	LowAD
rs5792178	chr11_60259558_60260058	MS4A4A	Distal	Mic	LowAD
rs1365247	chr11_60259558_60260058	MS4A4A	Distal	Mic	LowAD
rs7128450	chr11_60263330_60263830	MS4A4A	Distal	Mic	LowAD
rs12421663	chr11_60267634_60268134	MS4A4A	Distal	Mic	LowAD
rs7103808	chr11_60310624_60311124	MS4A6E	Distal	Mic	LowAD
rs61900467	chr11_60310624_60311124	MS4A6E	Distal	Mic	LowAD
rs12792791	chr11_60314622_60315122	MS4A6E	Distal	Mic	LowAD
rs10897046	chr11_60332200_60332700	MS4A6E	Distal	Mic	LowAD
rs10897047	chr11_60332200_60332700	MS4A6E	Distal	Mic	LowAD
rs10897048	chr11_60332200_60332700	MS4A6E	Distal	Mic	LowAD
rs11827324	chr11_60332200_60332700	MS4A6E	Distal	Mic	LowAD
rs10750932	chr11_60332200_60332700	MS4A6E	Distal	Mic	LowAD
rs2868119	chr11_60332882_60333382	MS4A6E	Promoter	Mic	LowAD
rs2868120	chr11_60332882_60333382	MS4A6E	Promoter	Mic	LowAD
rs2868121	chr11_60332882_60333382	MS4A6E	Promoter	Mic	LowAD
rs10897049	chr11_60332882_60333382	MS4A6E	Promoter	Mic	LowAD
rs4477457	chr11_60332882_60333382	MS4A6E	Promoter	Mic	LowAD
rs10792265	chr11_60332882_60333382	MS4A6E	Promoter	Mic	LowAD
rs7116069	chr11_60332882_60333382	MS4A6E	Promoter	Mic	LowAD
rs10750935	chr11_60333966_60334466	MS4A6E	Promoter	Mic	LowAD
rs4506675	chr11_60333966_60334466	MS4A6E	Promoter	Mic	LowAD
rs10792267	chr11_60333966_60334466	MS4A6E	Promoter	Mic	LowAD
rs7924433	chr11_60333966_60334466	MS4A6E	Promoter	Mic	LowAD
rs2508696	chr11_86006767_86007267	PICALM	Intronic	Mic	LowAD
rs602222	chr11_86006767_86007267	PICALM	Intronic	Mic	LowAD
rs66494408	chr11_86064740_86065240	PICALM	Intronic	Mic	LowAD
rs867611	chr11_86065371_86065871	PICALM	Intronic	Mic	LowAD
rs10898437	chr11_86136456_86136956	PICALM	Distal	Mic	LowAD
rs11234556	chr11_86138276_86138776	PICALM	Distal	Mic	LowAD
rs3844143	chr11_86138855_86139355	PICALM	Distal	Mic	LowAD
rs2374702	chr11_86141135_86141635	PICALM	Distal	Mic	LowAD
rs10792831	chr11_86141653_86142153	PICALM	Distal	Mic	LowAD
rs7110631	chr11_86144945_86145445	PICALM	Distal	Mic	LowAD
rs72962020	chr11_86151623_86152123	PICALM	Distal	Mic	LowAD
rs56157503	chr11_86151623_86152123	PICALM	Distal	Mic	LowAD
rs10792832	chr11_86156339_86156839	PICALM	Distal	Mic	LowAD
rs10898441	chr11_86156946_86157446	PICALM	Distal	Mic	LowAD
rs7113976	chr11_86158430_86158930	EED	Distal	Mic	LowAD
rs11234564	chr11_86158430_86158930	EED	Distal	Mic	LowAD
rs11603136	chr11_86163090_86163590	EED	Distal	Mic	LowAD
rs74685827	chr11_121482034_121482534	SORL1	Intronic	Mic	LowAD
rs11218343	chr11_121564824_121565324	SORL1	Intronic	Mic	LowAD
rs3781831	chr11_121564824_121565324	SORL1	Intronic	Mic	LowAD
rs17125473	chr11_121574099_121574599	SORL1	Exonic	Mic	LowAD
rs75279208	chr11_121575211_121575711	SORL1	Intronic	Mic	LowAD
rs1620130	chr11_121575826_121576326	SORL1	Intronic	Mic	LowAD
rs3781837	chr11_121577975_121578475	SORL1	Intronic	Mic	LowAD
rs59260691	chr11_121579153_121579653	SORL1	Intronic	Mic	LowAD
rs117807585	chr11_121585169_121585669	SORL1	Intronic	Mic	LowAD
rs146197030	chr11_121585932_121586432	SORL1	Intronic	Mic	LowAD
rs2282647	chr11_121590832_121591332	SORL1	Exonic	Mic	LowAD
rs12588482	chr14_52844614_52845114	GNPNAT1	Distal	Mic	LowAD
rs4904918	chr14_92460782_92461282	RIN3	Intronic	Mic	LowAD
rs3993878	chr14_92465405_92465905	RIN3	Intronic	Mic	LowAD
rs10129711	chr14_92465405_92465905	RIN3	Intronic	Mic	LowAD
rs10129728	chr14_92465405_92465905	RIN3	Intronic	Mic	LowAD
rs10130041	chr14_92465405_92465905	RIN3	Intronic	Mic	LowAD
rs4900124	chr14_92465972_92466472	RIN3	Intronic	Mic	LowAD
rs4904922	chr14_92465972_92466472	RIN3	Intronic	Mic	LowAD
rs4904923	chr14_92465972_92466472	RIN3	Intronic	Mic	LowAD
rs10130373	chr14_92465972_92466472	RIN3	Intronic	Mic	LowAD
rs17783630	chr14_92488771_92489271	RIN3	Intronic	Mic	LowAD
rs2094473	chr14_92488771_92489271	RIN3	Intronic	Mic	LowAD
rs10147792	chr14_92488771_92489271	RIN3	Intronic	Mic	LowAD
rs10147551	chr14_92488771_92489271	RIN3	Intronic	Mic	LowAD
rs61977322	chr14_92490622_92491122	RIN3	Intronic	Mic	LowAD
rs12888354	chr14_92493527_92494027	RIN3	Exonic	Mic	LowAD
rs6565173	chr16_29962567_29963067	TAOK2	Exonic	Mic	LowAD
rs9939286	chr16_31150958_31151458	PRSS36	Promoter	Mic	LowAD
rs9931998	chr16_81738809_81739309	PLCG2	Promoter	Mic	LowAD
rs12444183	chr16_81739422_81739922	PLCG2	Intronic	Mic	LowAD
rs12444189	chr16_81739422_81739922	PLCG2	Intronic	Mic	LowAD
rs4407053	chr16_81740097_81740597	PLCG2	Intronic	Mic	LowAD
rs4544235	chr16_81740097_81740597	PLCG2	Intronic	Mic	LowAD
rs34716007	chr17_5166181_5166681	ZNF594	Intronic	Mic	LowAD
rs55756850	chr17_5166181_5166681	ZNF594	Intronic	Mic	LowAD
rs7225151	chr17_5233579_5234079	SCIMP	Exonic	Mic	LowAD
rs75511804	chr17_5234584_5235084	SCIMP	Promoter	Mic	LowAD
rs4456560	chr17_5236878_5237378	SCIMP	Intronic	Mic	LowAD
rs10491140	chr17_45873575_45874075	MAPT	Intronic	Mic	LowAD
rs62055491	chr17_45873575_45874075	MAPT	Intronic	Mic	LowAD
rs34416056	chr17_45873575_45874075	MAPT	Intronic	Mic	LowAD
rs62055492	chr17_45873575_45874075	MAPT	Intronic	Mic	LowAD
rs17652748	chr17_46026154_46026654	STH	Exonic	Mic	LowAD
rs75010486	chr17_46026154_46026654	STH	Exonic	Mic	LowAD
rs16940806	chr17_46026154_46026654	STH	Exonic	Mic	LowAD
rs616338	chr17_49219864_49220364	GNGT2	Intronic	Mic	LowAD
rs2526377	chr17_58332303_58332803	MIR142	Promoter	Mic	LowAD
rs113353568	chr19_1037321_1037821	ABCA7	Exonic	Mic	LowAD
rs111525696	chr19_1037321_1037821	ABCA7	Exonic	Mic	LowAD
rs72973561	chr19_1037321_1037821	ABCA7	Exonic	Mic	LowAD
rs11668832	chr19_1812495_1812995	ATP8B3	Promoter	Mic	LowAD
rs144928608	chr19_44636048_44636548	PVR	Intronic	Mic	LowAD
rs8104660	chr19_44687835_44688335	CEACAM16	Distal	Mic	LowAD
rs186719419	chr19_44722281_44722781	CEACAM16	Distal	Mic	LowAD
rs2927487	chr19_44722281_44722781	CEACAM16	Distal	Mic	LowAD
rs150820726	chr19_44723801_44724301	BCL3	Distal	Mic	LowAD
rs2965102	chr19_44732552_44733052	BCL3	Distal	Mic	LowAD
rs56978169	chr19_44732552_44733052	BCL3	Distal	Mic	LowAD
rs77775146	chr19_44736623_44737123	BCL3	Distal	Mic	LowAD
rs17728272	chr19_44736623_44737123	BCL3	Distal	Mic	LowAD
rs1531517	chr19_44738716_44739216	BCL3	Distal	Mic	LowAD
rs191805311	chr19_44741295_44741795	BCL3	Distal	Mic	LowAD
rs531660643	chr19_44748313_44748813	BCL3	Exonic	Mic	LowAD
rs10426423	chr19_44844683_44845183	NECTIN2	Promoter	Mic	LowAD
rs77241309	chr19_44845723_44846223	NECTIN2	Promoter	Mic	LowAD
rs2927472	chr19_44845723_44846223	NECTIN2	Promoter	Mic	LowAD
rs3810143	chr19_44845723_44846223	NECTIN2	Promoter	Mic	LowAD
rs41289514	chr19_44856230_44856730	NECTIN2	Intronic	Mic	LowAD
rs183610051	chr19_44856230_44856730	NECTIN2	Intronic	Mic	LowAD
rs769448	chr19_44906307_44906807	APOE	Exonic	Mic	LowAD
rs138235833	chr19_44911764_44912264	APOC1	Distal	Mic	LowAD
rs547648737	chr19_44911764_44912264	APOC1	Distal	Mic	LowAD
rs157596	chr19_44922774_44923274	APOC1	Distal	Mic	LowAD
rs140526515	chr19_44924081_44924581	APOC1	Distal	Mic	LowAD
rs10424663	chr19_44925433_44925933	APOC1	Distal	Mic	LowAD
rs5112	chr19_44926988_44927488	APOC1	Distal	Mic	LowAD
rs5157	chr19_44943700_44944200	APOC4-APOC2	Intronic	Mic	LowAD
rs12721109	chr19_44943700_44944200	APOC4-APOC2	Intronic	Mic	LowAD
rs1132899	chr19_44944628_44945128	APOC2	Promoter	Mic	LowAD
rs5167	chr19_44945181_44945681	APOC2	Promoter	Mic	LowAD
rs2288912	chr19_44945729_44946229	APOC2	Promoter	Mic	LowAD
rs2288911	chr19_44945729_44946229	APOC2	Promoter	Mic	LowAD
rs9304646	chr19_44946834_44947334	APOC2	Intronic	Mic	LowAD
rs7256684	chr19_44948160_44948660	APOC2	Exonic	Mic	LowAD
rs5120	chr19_44948160_44948660	APOC2	Exonic	Mic	LowAD
rs12709888	chr19_44948160_44948660	APOC2	Exonic	Mic	LowAD
rs35194062	chr19_45001782_45002282	RELB	Intronic	Mic	LowAD
rs76856627	chr19_45040342_45040842	CLASRP	Exonic	Mic	LowAD
rs1560725	chr19_45040342_45040842	CLASRP	Exonic	Mic	LowAD
rs1968449	chr19_45040963_45041463	CLASRP	Intronic	Mic	LowAD
rs117252809	chr19_45454363_45454863	FOSB	Intronic	Mic	LowAD
rs6064392	chr20_56409440_56409940	CASS4	Distal	Mic	LowAD
rs17462136	chr20_56411799_56412299	CASS4	Promoter	Mic	LowAD
rs73156368	chr20_56412583_56413083	CASS4	Intronic	Mic	LowAD
rs6014722	chr20_56414731_56415231	CASS4	Intronic	Mic	LowAD
rs6024870	chr20_56422410_56422910	CASS4	Intronic	Mic	LowAD
rs6014724	chr20_56423169_56423669	CASS4	Intronic	Mic	LowAD
rs36172244	chr2_233152508_233153008	ATG16L1	Intronic	OPC	LowAD
rs145770967	chr2_233152508_233153008	ATG16L1	Intronic	OPC	LowAD
rs36148770	chr2_233152508_233153008	ATG16L1	Intronic	OPC	LowAD
rs36149367	chr2_233152508_233153008	ATG16L1	Intronic	OPC	LowAD
rs11728636	chr4_11021350_11021850	CLNK	Distal	OPC	LowAD
rs6448450	chr4_11022067_11022567	CLNK	Distal	OPC	LowAD
rs10267212	chr7_99997431_99997931	ZKSCAN1	Distal	OPC	LowAD
rs10267231	chr7_99997431_99997931	ZKSCAN1	Distal	OPC	LowAD
rs34256128	chr7_100004288_100004788	ZKSCAN1	Distal	OPC	LowAD
rs11787077	chr8_27607491_27607991	MIR6843	Intronic	OPC	LowAD
rs3814878	chr16_30030511_30031011	C16orf92	Exonic	OPC	LowAD
rs9928448	chr16_30061184_30061684	ALDOA	Intronic	OPC	LowAD
rs62055950	chr17_45775470_45775970	CRHR1	Intronic	OPC	LowAD
rs56043078	chr17_45775470_45775970	CRHR1	Intronic	OPC	LowAD
rs76329216	chr17_45861022_45861522	SPPL2C	Intronic	OPC	LowAD
rs62054846	chr17_45861022_45861522	SPPL2C	Intronic	OPC	LowAD
rs55646970	chr17_45861022_45861522	SPPL2C	Intronic	OPC	LowAD
rs55673092	chr17_45861022_45861522	SPPL2C	Intronic	OPC	LowAD
rs75690239	chr17_45864264_45864764	SPPL2C	Intronic	OPC	LowAD
rs62055464	chr17_45864264_45864764	SPPL2C	Intronic	OPC	LowAD
rs62055465	chr17_45864264_45864764	SPPL2C	Intronic	OPC	LowAD
rs62055466	chr17_45864920_45865420	SPPL2C	Intronic	OPC	LowAD
rs62055469	chr17_45865933_45866433	SPPL2C	Intronic	OPC	LowAD
rs62055470	chr17_45865933_45866433	SPPL2C	Intronic	OPC	LowAD
rs62055471	chr17_45865933_45866433	SPPL2C	Intronic	OPC	LowAD
rs56327054	chr17_45866552_45867052	SPPL2C	Intronic	OPC	LowAD
rs56036719	chr17_45866552_45867052	SPPL2C	Intronic	OPC	LowAD
rs55781174	chr17_45866552_45867052	SPPL2C	Intronic	OPC	LowAD
rs12150223	chr17_45866552_45867052	SPPL2C	Intronic	OPC	LowAD
rs62063668	chr17_46045004_46045504	STH	Exonic	OPC	LowAD
rs62063670	chr17_46045706_46046206	STH	Exonic	OPC	LowAD
rs62060798	chr17_46066292_46066792	STH	Exonic	OPC	LowAD
rs3886100	chr1_207565482_207565982	CR1	Intronic	Oli	LowAD
rs2274566	chr1_207579957_207580457	CR1L	Intronic	Oli	LowAD
rs77696070	chr2_127054900_127055400	BIN1	Exonic	Oli	LowAD
rs2276582	chr2_127058579_127059079	BIN1	Intronic	Oli	LowAD
rs2276579	chr2_127058579_127059079	BIN1	Intronic	Oli	LowAD
rs934826	chr2_127068194_127068694	BIN1	Intronic	Oli	LowAD
rs114446285	chr2_127068194_127068694	BIN1	Intronic	Oli	LowAD
rs3768858	chr2_127068997_127069497	BIN1	Intronic	Oli	LowAD
rs79491468	chr2_127068997_127069497	BIN1	Intronic	Oli	LowAD
rs78146168	chr2_127068997_127069497	BIN1	Intronic	Oli	LowAD
rs11682128	chr2_127081872_127082372	BIN1	Intronic	Oli	LowAD
rs11690153	chr2_127081872_127082372	BIN1	Intronic	Oli	LowAD
rs10194375	chr2_127081872_127082372	BIN1	Intronic	Oli	LowAD
rs28434131	chr2_127092661_127093161	BIN1	Intronic	Oli	LowAD
rs76168490	chr2_127092661_127093161	BIN1	Intronic	Oli	LowAD
rs11682186	chr2_127103461_127103961	BIN1	Intronic	Oli	LowAD
rs4663096	chr2_127104188_127104688	BIN1	Intronic	Oli	LowAD
rs4663097	chr2_127104188_127104688	BIN1	Intronic	Oli	LowAD
rs72838215	chr2_127104188_127104688	BIN1	Intronic	Oli	LowAD
rs6431219	chr2_127104188_127104688	BIN1	Intronic	Oli	LowAD
rs35860453	chr2_127108179_127108679	BIN1	Promoter	Oli	LowAD
rs13410629	chr2_127111134_127111634	BIN1	Distal	Oli	LowAD
rs13400939	chr2_127111134_127111634	BIN1	Distal	Oli	LowAD
rs34745987	chr2_127117765_127118265	BIN1	Distal	Oli	LowAD
rs3845674	chr2_127117765_127118265	BIN1	Distal	Oli	LowAD
rs10929007	chr2_127117765_127118265	BIN1	Distal	Oli	LowAD
rs71414738	chr2_127118330_127118830	BIN1	Distal	Oli	LowAD
rs58570929	chr2_127121588_127122088	BIN1	Distal	Oli	LowAD
rs11904144	chr2_127122203_127122703	BIN1	Distal	Oli	LowAD
rs893432	chr2_127137259_127137759	BIN1	Distal	Oli	LowAD
rs72781724	chr5_87122011_87122511	MIR4280	Intronic	Oli	LowAD
rs34031156	chr7_100080027_100080527	ZNF3	Intronic	Oli	LowAD
rs3823642	chr7_100198228_100198728	PVRIG	Exonic	Oli	LowAD
rs3735241	chr7_100198228_100198728	PVRIG	Exonic	Oli	LowAD
rs2005763	chr7_100217096_100217596	PVRIG	Intronic	Oli	LowAD
rs35358918	chr7_100217096_100217596	PVRIG	Intronic	Oli	LowAD
rs7003387	chr8_94949673_94950173	TP53INP1	Promoter	Oli	LowAD
rs598561	chr11_85941307_85941807	CCDC83	Distal	Oli	LowAD
rs3016327	chr11_86068973_86069473	PICALM	Intronic	Oli	LowAD
rs1237999	chr11_86103818_86104318	PICALM	Distal	Oli	LowAD
rs11234552	chr11_86134875_86135375	PICALM	Distal	Oli	LowAD
rs10898439	chr11_86148429_86148929	PICALM	Distal	Oli	LowAD
rs10898440	chr11_86148429_86148929	PICALM	Distal	Oli	LowAD
rs9787874	chr11_86148938_86149438	PICALM	Distal	Oli	LowAD
rs1427281	chr15_58666885_58667385	ADAM10	Intronic	Oli	LowAD
rs2250583	chr15_58758075_58758575	ADAM10	Distal	Oli	LowAD
rs76253980	chr17_5305959_5306459	RABEP1	Intronic	Oli	LowAD
rs62057147	chr17_45825769_45826269	SPPL2C	Exonic	Oli	LowAD
rs62057148	chr17_45825769_45826269	SPPL2C	Exonic	Oli	LowAD
rs62057149	chr17_45825769_45826269	SPPL2C	Exonic	Oli	LowAD
rs62057150	chr17_45825769_45826269	SPPL2C	Exonic	Oli	LowAD
rs56113217	chr17_45849409_45849909	SPPL2C	Intronic	Oli	LowAD
rs56269136	chr17_45849409_45849909	SPPL2C	Intronic	Oli	LowAD
rs12150516	chr17_45867119_45867619	SPPL2C	Intronic	Oli	LowAD
rs62055475	chr17_45867670_45868170	SPPL2C	Intronic	Oli	LowAD
rs62055476	chr17_45867670_45868170	SPPL2C	Intronic	Oli	LowAD
rs62055477	chr17_45868173_45868673	SPPL2C	Intronic	Oli	LowAD
rs78637438	chr17_45868173_45868673	SPPL2C	Intronic	Oli	LowAD
rs2316771	chr17_45868173_45868673	SPPL2C	Intronic	Oli	LowAD
rs62055478	chr17_45868173_45868673	SPPL2C	Intronic	Oli	LowAD
rs2316773	chr17_45869088_45869588	SPPL2C	Intronic	Oli	LowAD
rs2316774	chr17_45869088_45869588	SPPL2C	Intronic	Oli	LowAD
rs739643	chr17_45869088_45869588	SPPL2C	Intronic	Oli	LowAD
rs739642	chr17_45869088_45869588	SPPL2C	Intronic	Oli	LowAD
rs757055	chr17_45869088_45869588	SPPL2C	Intronic	Oli	LowAD
rs62061731	chr17_45940248_45940748	MAPT-IT1	Intronic	Oli	LowAD
rs62061732	chr17_45940248_45940748	MAPT-IT1	Intronic	Oli	LowAD
rs62062768	chr17_45941648_45942148	MAPT-IT1	Intronic	Oli	LowAD
rs62062776	chr17_45944582_45945082	MAPT-IT1	Intronic	Oli	LowAD
rs75839508	chr17_45944582_45945082	MAPT-IT1	Intronic	Oli	LowAD
rs75686108	chr17_45944582_45945082	MAPT-IT1	Intronic	Oli	LowAD
rs79765413	chr17_45944582_45945082	MAPT-IT1	Intronic	Oli	LowAD
rs78834738	chr17_45944582_45945082	MAPT-IT1	Intronic	Oli	LowAD
rs77513497	chr17_45967869_45968369	STH	Intronic	Oli	LowAD
rs62062270	chr17_46013760_46014260	STH	Intronic	Oli	LowAD
rs41374248	chr17_46042900_46043400	STH	Exonic	Oli	LowAD
rs79252344	chr17_46042900_46043400	STH	Exonic	Oli	LowAD
rs62061852	chr17_46118020_46118520	KANSL1-AS1	Intronic	Oli	LowAD
rs1468240	chr17_46118843_46119343	KANSL1-AS1	Intronic	Oli	LowAD
rs71338744	chr19_45045112_45045612	CLASRP	Intronic	Oli	LowAD
rs112481437	chr19_45045795_45046295	CLASRP	Intronic	Oli	LowAD
rs5843211	chr21_26118509_26119009	APP	Intronic	Oli	LowAD
rs72843900	chr2_127045021_127045521	BIN1	Distal	Inh	LowAD
rs35505579	chr8_27479047_27479547	CHRNA2	Intronic	Inh	LowAD
rs1800978	chr9_104903624_104904124	ABCA1	Intronic	Inh	LowAD
rs1799777	chr9_104903624_104904124	ABCA1	Intronic	Inh	LowAD
rs11150584	chr16_30027873_30028373	C16orf92	Intronic	Inh	LowAD
rs62057107	chr17_45818600_45819100	SPPL2C	Intronic	Inh	LowAD
rs12150390	chr17_45818600_45819100	SPPL2C	Intronic	Inh	LowAD
rs2696590	chr17_46144141_46144641	KANSL1-AS1	Intronic	Inh	LowAD
rs200323909	chr19_44772840_44773340	CBLC	Distal	Inh	LowAD
rs2256331	chr21_26105600_26106100	APP	Intronic	Inh	LowAD
rs1135173	chr2_233146177_233146677	ATG16L1	Exonic	Ext	LowAD
rs36189208	chr2_233146177_233146677	ATG16L1	Exonic	Ext	LowAD
rs36181881	chr2_233146177_233146677	ATG16L1	Exonic	Ext	LowAD
rs36129046	chr2_233150667_233151167	ATG16L1	Intronic	Ext	LowAD
rs139207110	chr2_233150667_233151167	ATG16L1	Intronic	Ext	LowAD
rs142339885	chr2_233150667_233151167	ATG16L1	Intronic	Ext	LowAD
rs150521622	chr2_233150667_233151167	ATG16L1	Intronic	Ext	LowAD
rs149754149	chr2_233150667_233151167	ATG16L1	Intronic	Ext	LowAD
rs36073129	chr4_959432_959932	DGKQ	Exonic	Ext	LowAD
rs9275201	chr6_32688777_32689277	HLA-DQB1	Distal	Ext	LowAD
rs9275203	chr6_32688777_32689277	HLA-DQB1	Distal	Ext	LowAD
rs13235951	chr7_100489731_100490231	NYAP1	Intronic	Ext	LowAD
rs28834970	chr8_27337226_27337726	PTK2B	Intronic	Ext	LowAD
rs7817464	chr8_27353309_27353809	PTK2B	Intronic	Ext	LowAD
rs2322599	chr8_27354081_27354581	PTK2B	Intronic	Ext	LowAD
rs17057043	chr8_27362507_27363007	PTK2B	Intronic	Ext	LowAD
rs4732728	chr8_27583541_27584041	MIR6843	Distal	Ext	LowAD
rs7082102	chr10_80344768_80345268	DYDC2	Intronic	Ext	LowAD
rs7082705	chr10_80410732_80411232	PRXL2A	Intronic	Ext	LowAD
rs7086627	chr10_80460758_80461258	TSPAN14	Intronic	Ext	LowAD
rs2293576	chr11_47413257_47413757	SLC39A13	Exonic	Ext	LowAD
rs987482	chr11_121494752_121495252	SORL1	Intronic	Ext	LowAD
rs12928610	chr16_30004334_30004834	HIRIP3	Exonic	Ext	LowAD
rs12325400	chr16_30012079_30012579	DOC2A	Exonic	Ext	LowAD
rs11642612	chr16_30018529_30019029	DOC2A	Intronic	Ext	LowAD
rs8056564	chr16_81946233_81946733	SDR42E1	Intronic	Ext	LowAD
rs3213878	chr17_5135720_5136220	ZNF232	Intronic	Ext	LowAD
rs59587437	chr17_5326445_5326945	RABEP1	Intronic	Ext	LowAD
rs968028	chr17_45703331_45703831	LINC02210	Intronic	Ext	LowAD
rs10445364	chr17_45838812_45839312	SPPL2C	Intronic	Ext	LowAD
rs10445333	chr17_45838812_45839312	SPPL2C	Intronic	Ext	LowAD
rs62056804	chr17_45904820_45905320	MAPT-IT1	Intronic	Ext	LowAD
rs74509629	chr17_45907934_45908434	MAPT-IT1	Intronic	Ext	LowAD
rs79290980	chr17_45907934_45908434	MAPT-IT1	Intronic	Ext	LowAD
rs1467968	chr17_45909021_45909521	MAPT-IT1	Intronic	Ext	LowAD
rs4371195	chr17_45909021_45909521	MAPT-IT1	Intronic	Ext	LowAD
rs12150125	chr17_45909021_45909521	MAPT-IT1	Intronic	Ext	LowAD
rs12150527	chr17_45909021_45909521	MAPT-IT1	Intronic	Ext	LowAD
rs62063291	chr17_45965896_45966396	STH	Intronic	Ext	LowAD
rs62063292	chr17_45965896_45966396	STH	Intronic	Ext	LowAD
rs75242405	chr17_45971772_45972272	STH	Intronic	Ext	LowAD
rs17651093	chr17_45971772_45972272	STH	Intronic	Ext	LowAD
rs62063852	chr17_45997173_45997673	STH	Promoter	Ext	LowAD
rs62063853	chr17_45997173_45997673	STH	Promoter	Ext	LowAD
rs62063854	chr17_45997173_45997673	STH	Promoter	Ext	LowAD
rs12185243	chr17_46037766_46038266	STH	Intronic	Ext	LowAD
rs11079729	chr17_46037766_46038266	STH	Intronic	Ext	LowAD
rs12150542	chr17_46038362_46038862	STH	Exonic	Ext	LowAD
rs12150090	chr17_46038362_46038862	STH	Exonic	Ext	LowAD
rs199514	chr17_46779279_46779779	WNT3	Intronic	Ext	LowAD
rs199513	chr17_46779279_46779779	WNT3	Intronic	Ext	LowAD
rs199498	chr17_46787950_46788450	WNT3	Intronic	Ext	LowAD
rs4351	chr17_63492149_63492649	ACE	Intronic	Ext	LowAD
rs10417824	chr19_1009207_1009707	GRIN3B	Exonic	Ext	LowAD
rs11670146	chr19_1847600_1848100	REXO1	Intronic	Ext	LowAD
rs12974664	chr19_1856056_1856556	KLF16	Intronic	Ext	LowAD
rs11666480	chr19_1856056_1856556	KLF16	Intronic	Ext	LowAD
rs10426401	chr19_44644256_44644756	PVR	Intronic	Ext	LowAD
rs147491548	chr19_44968051_44968551	CLPTM1	Intronic	Ext	LowAD
rs16979586	chr19_44968051_44968551	CLPTM1	Intronic	Ext	LowAD
rs59136988	chr19_44968750_44969250	CLPTM1	Intronic	Ext	LowAD
rs7248421	chr19_45102567_45103067	PPP1R37	Intronic	Ext	LowAD
rs754366	chr19_45130070_45130570	NKPD1	Intronic	Ext	LowAD
rs2041262	chr19_45140597_45141097	NKPD1	Intronic	Ext	LowAD
rs78273125	chr19_45140597_45141097	NKPD1	Intronic	Ext	LowAD
rs181779730	chr19_45146102_45146602	NKPD1	Exonic	Ext	LowAD
rs78073763	chr19_45146102_45146602	NKPD1	Exonic	Ext	LowAD
rs74846209	chr19_45146737_45147237	NKPD1	Exonic	Ext	LowAD
rs1048699	chr19_45146737_45147237	NKPD1	Exonic	Ext	LowAD
rs6069749	chr20_56446484_56446984	RTF2	Intronic	Ext	LowAD
rs10207628	chr2_127094143_127094643	BIN1	Intronic	Ast	InterAD
rs10207708	chr2_127094143_127094643	BIN1	Intronic	Ast	InterAD
rs11694264	chr2_127094143_127094643	BIN1	Intronic	Ast	InterAD
rs74504435	chr7_54881352_54881852	SEC61G	Distal	Ast	InterAD
rs1727134	chr7_100215739_100216239	PVRIG	Intronic	Ast	InterAD
rs34183059	chr7_100481512_100482012	NYAP1	Distal	Ast	InterAD
rs12539172	chr7_100493733_100494233	NYAP1	Exonic	Ast	InterAD
rs10091215	chr8_27594173_27594673	MIR6843	Distal	Ast	InterAD
rs7817366	chr8_27594173_27594673	MIR6843	Distal	Ast	InterAD
rs7821500	chr8_27594173_27594673	MIR6843	Distal	Ast	InterAD
rs146954978	chr8_27594173_27594673	MIR6843	Distal	Ast	InterAD
rs35598594	chr8_27594686_27595186	MIR6843	Distal	Ast	InterAD
rs10092082	chr8_27594686_27595186	MIR6843	Distal	Ast	InterAD
rs9331931	chr8_27600253_27600753	MIR6843	Intronic	Ast	InterAD
rs28541694	chr8_27604003_27604503	MIR6843	Exonic	Ast	InterAD
rs1532276	chr8_27608635_27609135	MIR6843	Exonic	Ast	InterAD
rs1532277	chr8_27608635_27609135	MIR6843	Exonic	Ast	InterAD
rs1532278	chr8_27608635_27609135	MIR6843	Exonic	Ast	InterAD
rs867232	chr8_27609332_27609832	MIR6843	Intronic	Ast	InterAD
rs17515931	chr8_27612524_27613024	MIR6843	Intronic	Ast	InterAD
rs530324	chr8_27633586_27634086	SCARA3	Promoter	Ast	InterAD
rs138529507	chr8_27636427_27636927	SCARA3	Intronic	Ast	InterAD
rs1693551	chr8_100663219_100663719	SNX31	Promoter	Ast	InterAD
rs567075	chr11_86118969_86119469	PICALM	Distal	Ast	InterAD
rs60228070	chr11_121487181_121487681	SORL1	Intronic	Ast	InterAD
rs9665907	chr11_121564404_121564904	SORL1	Intronic	Ast	InterAD
rs11218343	chr11_121564404_121564904	SORL1	Intronic	Ast	InterAD
rs1784920	chr11_121566449_121566949	SORL1	Intronic	Ast	InterAD
rs2025633	chr14_52850500_52851000	GNPNAT1	Distal	Ast	InterAD
rs12434433	chr14_105737305_105737805	MIR8071-1	Distal	Ast	InterAD
rs35763222	chr15_63349022_63349522	CA12	Intronic	Ast	InterAD
rs58217768	chr16_29992332_29992832	INO80E	Exonic	Ast	InterAD
rs11642740	chr16_30049210_30049710	FAM57B	Intronic	Ast	InterAD
rs55996632	chr17_45858170_45858670	SPPL2C	Intronic	Ast	InterAD
rs55886302	chr17_45858170_45858670	SPPL2C	Intronic	Ast	InterAD
rs1864325	chr17_45900427_45900927	MAPT-IT1	Intronic	Ast	InterAD
rs62056795	chr17_45900427_45900927	MAPT-IT1	Intronic	Ast	InterAD
rs62056796	chr17_45900427_45900927	MAPT-IT1	Intronic	Ast	InterAD
rs62062769	chr17_45942236_45942736	MAPT-IT1	Intronic	Ast	InterAD
rs62062770	chr17_45942236_45942736	MAPT-IT1	Intronic	Ast	InterAD
rs62062794	chr17_45948976_45949476	STH	Intronic	Ast	InterAD
rs242561	chr17_45948976_45949476	STH	Intronic	Ast	InterAD
rs55821155	chr17_45954861_45955361	STH	Intronic	Ast	InterAD
rs56080482	chr17_45954861_45955361	STH	Intronic	Ast	InterAD
rs62063775	chr17_45973262_45973762	STH	Exonic	Ast	InterAD
rs62063776	chr17_45973262_45973762	STH	Exonic	Ast	InterAD
rs117124984	chr17_45973868_45974368	STH	Exonic	Ast	InterAD
rs118087478	chr17_45973868_45974368	STH	Exonic	Ast	InterAD
rs77875796	chr17_45973868_45974368	STH	Exonic	Ast	InterAD
rs17651243	chr17_45974879_45975379	STH	Exonic	Ast	InterAD
rs78104015	chr17_45974879_45975379	STH	Exonic	Ast	InterAD
rs62063777	chr17_45975563_45976063	STH	Exonic	Ast	InterAD
rs17651857	chr17_45992164_45992664	STH	Intronic	Ast	InterAD
rs74759276	chr17_45992164_45992664	STH	Intronic	Ast	InterAD
rs17651887	chr17_45992164_45992664	STH	Intronic	Ast	InterAD
rs78599197	chr17_45992164_45992664	STH	Intronic	Ast	InterAD
rs62064664	chr17_46003916_46004416	STH	Intronic	Ast	InterAD
rs62064665	chr17_46003916_46004416	STH	Intronic	Ast	InterAD
rs62060786	chr17_46059319_46059819	STH	Intronic	Ast	InterAD
rs62060787	chr17_46059319_46059819	STH	Intronic	Ast	InterAD
rs41384744	chr17_46059319_46059819	STH	Intronic	Ast	InterAD
rs62061809	chr17_46100977_46101477	KANSL1-AS1	Intronic	Ast	InterAD
rs2696590	chr17_46144136_46144636	KANSL1-AS1	Intronic	Ast	InterAD
rs956329	chr17_46173687_46174187	KANSL1-AS1	Intronic	Ast	InterAD
rs2696707	chr17_46186900_46187400	KANSL1-AS1	Intronic	Ast	InterAD
rs4366	chr17_63497731_63498231	ACE	Exonic	Ast	InterAD
rs4802235	chr19_44721264_44721764	CEACAM16	Distal	Ast	InterAD
rs187010311	chr19_44774563_44775063	CBLC	Distal	Ast	InterAD
rs574578352	chr19_44796798_44797298	BCAM	Intronic	Ast	InterAD
rs73048258	chr19_44807867_44808367	BCAM	Promoter	Ast	InterAD
rs149626525	chr19_44807867_44808367	BCAM	Promoter	Ast	InterAD
rs560898656	chr19_44807867_44808367	BCAM	Promoter	Ast	InterAD
rs77241309	chr19_44845771_44846271	NECTIN2	Promoter	Ast	InterAD
rs2927472	chr19_44845771_44846271	NECTIN2	Promoter	Ast	InterAD
rs3810143	chr19_44845771_44846271	NECTIN2	Promoter	Ast	InterAD
rs446037	chr19_44904099_44904599	APOE	Promoter	Ast	InterAD
rs434132	chr19_44904099_44904599	APOE	Promoter	Ast	InterAD
rs769452	chr19_44907534_44908034	APOE	Exonic	Ast	InterAD
rs1081106	chr19_44909728_44910228	APOE	Distal	Ast	InterAD
rs138235833	chr19_44911539_44912039	APOC1	Distal	Ast	InterAD
rs547648737	chr19_44911539_44912039	APOC1	Distal	Ast	InterAD
rs7257468	chr19_44949621_44950121	APOC2	Distal	Ast	InterAD
rs7258345	chr19_44949621_44950121	APOC2	Distal	Ast	InterAD
rs7257476	chr19_44949621_44950121	APOC2	Distal	Ast	InterAD
rs12709889	chr19_44949621_44950121	APOC2	Distal	Ast	InterAD
rs10402642	chr19_44950560_44951060	CLPTM1	Distal	Ast	InterAD
rs11361742	chr19_44950560_44951060	CLPTM1	Distal	Ast	InterAD
rs7248162	chr19_44951240_44951740	CLPTM1	Distal	Ast	InterAD
rs7247227	chr19_44951240_44951740	CLPTM1	Distal	Ast	InterAD
rs7247551	chr19_44951240_44951740	CLPTM1	Distal	Ast	InterAD
rs892101	chr19_44951936_44952436	CLPTM1	Distal	Ast	InterAD
rs1882752	chr19_44958028_44958528	CLPTM1	Intronic	Ast	InterAD
rs117034857	chr19_45455623_45456123	FOSB	Intronic	Ast	InterAD
rs11585858	chr1_161185951_161186451	B4GALT3	Exonic	Mic	InterAD
rs2070901	chr1_161215007_161215507	FCER1G	Promoter	Mic	InterAD
rs2070902	chr1_161217847_161218347	FCER1G	Intronic	Mic	InterAD
rs10166461	chr2_127101832_127102332	BIN1	Intronic	Mic	InterAD
rs873270	chr2_127101832_127102332	BIN1	Intronic	Mic	InterAD
rs749007	chr2_127101832_127102332	BIN1	Intronic	Mic	InterAD
rs749006	chr2_127101832_127102332	BIN1	Intronic	Mic	InterAD
rs13025717	chr2_127128404_127128904	BIN1	Distal	Mic	InterAD
rs13025765	chr2_127128404_127128904	BIN1	Distal	Mic	InterAD
rs12618593	chr2_127128404_127128904	BIN1	Distal	Mic	InterAD
rs12617835	chr2_127128404_127128904	BIN1	Distal	Mic	InterAD
rs6710467	chr2_127132160_127132660	BIN1	Distal	Mic	InterAD
rs113112754	chr2_127132780_127133280	BIN1	Distal	Mic	InterAD
rs4663104	chr2_127132780_127133280	BIN1	Distal	Mic	InterAD
rs56193035	chr2_127133583_127134083	BIN1	Distal	Mic	InterAD
rs57109420	chr2_127133583_127134083	BIN1	Distal	Mic	InterAD
rs4663105	chr2_127133583_127134083	BIN1	Distal	Mic	InterAD
rs59253801	chr2_127133583_127134083	BIN1	Distal	Mic	InterAD
rs59176034	chr2_127133583_127134083	BIN1	Distal	Mic	InterAD
rs34779859	chr2_127135112_127135612	BIN1	Distal	Mic	InterAD
rs6733839	chr2_127135112_127135612	BIN1	Distal	Mic	InterAD
rs72838287	chr2_127135112_127135612	BIN1	Distal	Mic	InterAD
rs72838288	chr2_127135112_127135612	BIN1	Distal	Mic	InterAD
rs745717	chr2_127136292_127136792	BIN1	Distal	Mic	InterAD
rs56368748	chr2_127136292_127136792	BIN1	Distal	Mic	InterAD
rs730482	chr2_127136798_127137298	BIN1	Distal	Mic	InterAD
rs744373	chr2_127136798_127137298	BIN1	Distal	Mic	InterAD
rs893434	chr2_127136798_127137298	BIN1	Distal	Mic	InterAD
rs893433	chr2_127136798_127137298	BIN1	Distal	Mic	InterAD
rs893432	chr2_127136798_127137298	BIN1	Distal	Mic	InterAD
rs6431223	chr2_127137711_127138211	BIN1	Distal	Mic	InterAD
rs10933431	chr2_233116983_233117483	INPP5D	Intronic	Mic	InterAD
rs10933432	chr2_233116983_233117483	INPP5D	Intronic	Mic	InterAD
rs6715767	chr2_233165880_233166380	ATG16L1	Intronic	Mic	InterAD
rs76100445	chr4_10983838_10984338	CLNK	Distal	Mic	InterAD
rs62375391	chr5_86997644_86998144	LOC101929380	Intronic	Mic	InterAD
rs58233521	chr5_87079873_87080373	MIR4280	Intronic	Mic	InterAD
rs113706587	chr5_180200925_180201425	RASGEF1C	Intronic	Mic	InterAD
rs114841132	chr5_180207523_180208023	RASGEF1C	Intronic	Mic	InterAD
rs9268627	chr6_32437904_32438404	HLA-DRA	Promoter	Mic	InterAD
rs7773030	chr6_32473399_32473899	HLA-DRA	Distal	Mic	InterAD
rs614348	chr6_32606094_32606594	HLA-DRB1	Distal	Mic	InterAD
rs2760994	chr6_32606094_32606594	HLA-DRB1	Distal	Mic	InterAD
rs535852	chr6_32609770_32610270	HLA-DRB1	Distal	Mic	InterAD
rs532965	chr6_32609770_32610270	HLA-DRB1	Distal	Mic	InterAD
rs33964890	chr6_32616131_32616631	HLA-DQA1	Distal	Mic	InterAD
rs33915496	chr6_32616131_32616631	HLA-DQA1	Distal	Mic	InterAD
rs9271579	chr6_32622384_32622884	HLA-DQA1	Distal	Mic	InterAD
rs9271580	chr6_32622384_32622884	HLA-DQA1	Distal	Mic	InterAD
rs9271608	chr6_32623562_32624062	HLA-DQA1	Distal	Mic	InterAD
rs9275213	chr6_32690173_32690673	HLA-DQB1	Distal	Mic	InterAD
rs2858331	chr6_32713176_32713676	HLA-DQA2	Distal	Mic	InterAD
rs9357347	chr6_41182585_41183085	TREML2	Distal	Mic	InterAD
rs3800342	chr6_41191527_41192027	TREML2	Exonic	Mic	InterAD
rs4714447	chr6_41271756_41272256	TREM1	Distal	Mic	InterAD
rs9381562	chr6_47461735_47462235	CD2AP	Distal	Mic	InterAD
rs2405441	chr7_100167809_100168309	GAL3ST4	Exonic	Mic	InterAD
rs13230744	chr7_100199889_100200389	PVRIG	Exonic	Mic	InterAD
rs2405442	chr7_100373205_100373705	PILRA	Exonic	Mic	InterAD
rs1859788	chr7_100373775_100374275	PILRA	Intronic	Mic	InterAD
rs10255133	chr7_100384569_100385069	PILRA	Intronic	Mic	InterAD
rs12703526	chr7_143410403_143410903	EPHA1	Promoter	Mic	InterAD
rs11762262	chr7_143410403_143410903	EPHA1	Promoter	Mic	InterAD
rs11769559	chr7_143414056_143414556	EPHA1	Intronic	Mic	InterAD
rs13265352	chr8_27390798_27391298	MIR6842	Intronic	Mic	InterAD
rs6982393	chr8_94968342_94968842	TP53INP1	Intronic	Mic	InterAD
rs1693568	chr8_100665073_100665573	SNX31	Promoter	Mic	InterAD
rs10761426	chr10_59980177_59980677	LINC01553	Distal	Mic	InterAD
rs2486302	chr10_80316624_80317124	MAT1A	Distal	Mic	InterAD
rs4934169	chr10_80443569_80444069	TSPAN14	Distal	Mic	InterAD
rs7896832	chr10_80497718_80498218	LOC101929574	Intronic	Mic	InterAD
rs7096909	chr10_80524416_80524916	LOC101929574	Exonic	Mic	InterAD
rs10838702	chr11_47388995_47389495	SPI1	Distal	Mic	InterAD
rs1377416	chr11_47394757_47395257	MIR4487	Distal	Mic	InterAD
rs10769263	chr11_47395486_47395986	MIR4487	Distal	Mic	InterAD
rs583791	chr11_60179625_60180125	MS4A6A	Exonic	Mic	InterAD
rs632185	chr11_60183739_60184239	MS4A6A	Intronic	Mic	InterAD
rs55661415	chr11_60184478_60184978	MS4A6A	Promoter	Mic	InterAD
rs1820430	chr11_60185807_60186307	MS4A6A	Promoter	Mic	InterAD
rs718376	chr11_60235246_60235746	MIR6503	Distal	Mic	InterAD
rs34862992	chr11_60251440_60251940	MS4A4A	Distal	Mic	InterAD
rs636317	chr11_60251440_60251940	MS4A4A	Distal	Mic	InterAD
rs636341	chr11_60251440_60251940	MS4A4A	Distal	Mic	InterAD
rs7128450	chr11_60263326_60263826	MS4A4A	Distal	Mic	InterAD
rs11824773	chr11_60309400_60309900	MS4A6E	Distal	Mic	InterAD
rs7103808	chr11_60310643_60311143	MS4A6E	Distal	Mic	InterAD
rs61900467	chr11_60310643_60311143	MS4A6E	Distal	Mic	InterAD
rs12792791	chr11_60314871_60315371	MS4A6E	Distal	Mic	InterAD
rs59224344	chr11_60316254_60316754	MS4A6E	Distal	Mic	InterAD
rs2868118	chr11_60332869_60333369	MS4A6E	Promoter	Mic	InterAD
rs2868119	chr11_60332869_60333369	MS4A6E	Promoter	Mic	InterAD
rs2868120	chr11_60332869_60333369	MS4A6E	Promoter	Mic	InterAD
rs2868121	chr11_60332869_60333369	MS4A6E	Promoter	Mic	InterAD
rs10897049	chr11_60332869_60333369	MS4A6E	Promoter	Mic	InterAD
rs4477457	chr11_60332869_60333369	MS4A6E	Promoter	Mic	InterAD
rs10792265	chr11_60332869_60333369	MS4A6E	Promoter	Mic	InterAD
rs7116069	chr11_60332869_60333369	MS4A6E	Promoter	Mic	InterAD
rs10750935	chr11_60333977_60334477	MS4A6E	Promoter	Mic	InterAD
rs4506675	chr11_60333977_60334477	MS4A6E	Promoter	Mic	InterAD
rs10792267	chr11_60333977_60334477	MS4A6E	Promoter	Mic	InterAD
rs7924433	chr11_60333977_60334477	MS4A6E	Promoter	Mic	InterAD
rs2304936	chr11_60334591_60335091	MS4A6E	Promoter	Mic	InterAD
rs2304935	chr11_60334591_60335091	MS4A6E	Promoter	Mic	InterAD
rs2304934	chr11_60334591_60335091	MS4A6E	Promoter	Mic	InterAD
rs2304933	chr11_60334591_60335091	MS4A6E	Promoter	Mic	InterAD
rs66494408	chr11_86064577_86065077	PICALM	Intronic	Mic	InterAD
rs11234552	chr11_86134749_86135249	PICALM	Distal	Mic	InterAD
rs3844143	chr11_86138850_86139350	PICALM	Distal	Mic	InterAD
rs10792831	chr11_86141594_86142094	PICALM	Distal	Mic	InterAD
rs56295979	chr11_86150208_86150708	PICALM	Distal	Mic	InterAD
rs7480193	chr11_86150208_86150708	PICALM	Distal	Mic	InterAD
rs10792832	chr11_86156790_86157290	PICALM	Distal	Mic	InterAD
rs11603136	chr11_86163077_86163577	EED	Distal	Mic	InterAD
rs74685827	chr11_121482041_121482541	SORL1	Intronic	Mic	InterAD
rs75279208	chr11_121575217_121575717	SORL1	Intronic	Mic	InterAD
rs1620130	chr11_121575815_121576315	SORL1	Intronic	Mic	InterAD
rs12588482	chr14_52844581_52845081	GNPNAT1	Distal	Mic	InterAD
rs12589020	chr14_52845135_52845635	GNPNAT1	Distal	Mic	InterAD
rs1886786	chr14_52845135_52845635	GNPNAT1	Distal	Mic	InterAD
rs4898768	chr14_52845135_52845635	GNPNAT1	Distal	Mic	InterAD
rs4901303	chr14_52845135_52845635	GNPNAT1	Distal	Mic	InterAD
rs7151643	chr14_52846853_52847353	GNPNAT1	Distal	Mic	InterAD
rs7151474	chr14_52846853_52847353	GNPNAT1	Distal	Mic	InterAD
rs7151491	chr14_52846853_52847353	GNPNAT1	Distal	Mic	InterAD
rs4904918	chr14_92460808_92461308	RIN3	Intronic	Mic	InterAD
rs941648	chr14_92465363_92465863	RIN3	Intronic	Mic	InterAD
rs3993878	chr14_92465363_92465863	RIN3	Intronic	Mic	InterAD
rs10129711	chr14_92465363_92465863	RIN3	Intronic	Mic	InterAD
rs10129728	chr14_92465363_92465863	RIN3	Intronic	Mic	InterAD
rs10130041	chr14_92465363_92465863	RIN3	Intronic	Mic	InterAD
rs4900124	chr14_92465947_92466447	RIN3	Intronic	Mic	InterAD
rs4904922	chr14_92465947_92466447	RIN3	Intronic	Mic	InterAD
rs4904923	chr14_92465947_92466447	RIN3	Intronic	Mic	InterAD
rs10130373	chr14_92465947_92466447	RIN3	Intronic	Mic	InterAD
rs17783630	chr14_92488792_92489292	RIN3	Intronic	Mic	InterAD
rs2094473	chr14_92488792_92489292	RIN3	Intronic	Mic	InterAD
rs10147792	chr14_92488792_92489292	RIN3	Intronic	Mic	InterAD
rs10147551	chr14_92488792_92489292	RIN3	Intronic	Mic	InterAD
rs61977322	chr14_92490431_92490931	RIN3	Intronic	Mic	InterAD
rs12888354	chr14_92493475_92493975	RIN3	Exonic	Mic	InterAD
rs111340278	chr15_63283069_63283569	APH1B	Intronic	Mic	InterAD
rs9939286	chr16_31150902_31151402	PRSS36	Promoter	Mic	InterAD
rs9931998	chr16_81738799_81739299	PLCG2	Promoter	Mic	InterAD
rs12444183	chr16_81739470_81739970	PLCG2	Intronic	Mic	InterAD
rs12444189	chr16_81739470_81739970	PLCG2	Intronic	Mic	InterAD
rs4407053	chr16_81740102_81740602	PLCG2	Intronic	Mic	InterAD
rs4544235	chr16_81740102_81740602	PLCG2	Intronic	Mic	InterAD
rs34716007	chr17_5166082_5166582	ZNF594	Intronic	Mic	InterAD
rs7225151	chr17_5233519_5234019	SCIMP	Intronic	Mic	InterAD
rs75511804	chr17_5234601_5235101	SCIMP	Promoter	Mic	InterAD
rs10491140	chr17_45873548_45874048	MAPT	Intronic	Mic	InterAD
rs62055491	chr17_45873548_45874048	MAPT	Intronic	Mic	InterAD
rs34416056	chr17_45873548_45874048	MAPT	Intronic	Mic	InterAD
rs62055492	chr17_45873548_45874048	MAPT	Intronic	Mic	InterAD
rs2158257	chr17_46026508_46027008	STH	Exonic	Mic	InterAD
rs2141299	chr17_46163236_46163736	KANSL1-AS1	Intronic	Mic	InterAD
rs616338	chr17_49219786_49220286	GNGT2	Intronic	Mic	InterAD
rs2526377	chr17_58332334_58332834	MIR142	Promoter	Mic	InterAD
rs75364577	chr19_1027945_1028445	CNN2	Intronic	Mic	InterAD
rs144928319	chr19_1027945_1028445	CNN2	Intronic	Mic	InterAD
rs72973561	chr19_1037573_1038073	ABCA7	Exonic	Mic	InterAD
rs72618590	chr19_1037573_1038073	ABCA7	Exonic	Mic	InterAD
rs1057874	chr19_1038280_1038780	ABCA7	Promoter	Mic	InterAD
rs112131072	chr19_1066372_1066872	ARHGAP45	Intronic	Mic	InterAD
rs11668832	chr19_1812473_1812973	ATP8B3	Promoter	Mic	InterAD
rs144928608	chr19_44635993_44636493	PVR	Intronic	Mic	InterAD
rs2965156	chr19_44685089_44685589	CEACAM16	Distal	Mic	InterAD
rs8104660	chr19_44687821_44688321	CEACAM16	Distal	Mic	InterAD
rs186719419	chr19_44722027_44722527	CEACAM16	Distal	Mic	InterAD
rs150820726	chr19_44723814_44724314	BCL3	Distal	Mic	InterAD
rs2965102	chr19_44732560_44733060	BCL3	Distal	Mic	InterAD
rs56978169	chr19_44732560_44733060	BCL3	Distal	Mic	InterAD
rs77775146	chr19_44736652_44737152	BCL3	Distal	Mic	InterAD
rs17728272	chr19_44736652_44737152	BCL3	Distal	Mic	InterAD
rs1531517	chr19_44738711_44739211	BCL3	Distal	Mic	InterAD
rs191805311	chr19_44741287_44741787	BCL3	Distal	Mic	InterAD
rs4803749	chr19_44743536_44744036	BCL3	Distal	Mic	InterAD
rs749005643	chr19_44747868_44748368	BCL3	Exonic	Mic	InterAD
rs531660643	chr19_44748456_44748956	BCL3	Exonic	Mic	InterAD
rs189358492	chr19_44762090_44762590	MIR8085	Distal	Mic	InterAD
rs10426423	chr19_44844674_44845174	NECTIN2	Promoter	Mic	InterAD
rs41289514	chr19_44856211_44856711	NECTIN2	Intronic	Mic	InterAD
rs183610051	chr19_44856211_44856711	NECTIN2	Intronic	Mic	InterAD
rs375972689	chr19_44856800_44857300	NECTIN2	Intronic	Mic	InterAD
rs157596	chr19_44922762_44923262	APOC1	Distal	Mic	InterAD
rs157598	chr19_44923506_44924006	APOC1	Distal	Mic	InterAD
rs139136389	chr19_44923506_44924006	APOC1	Distal	Mic	InterAD
rs759436949	chr19_44923506_44924006	APOC1	Distal	Mic	InterAD
rs140526515	chr19_44924094_44924594	APOC1	Distal	Mic	InterAD
rs565334527	chr19_44925408_44925908	APOC1	Distal	Mic	InterAD
rs10424663	chr19_44925408_44925908	APOC1	Distal	Mic	InterAD
rs5157	chr19_44943712_44944212	APOC4-APOC2	Intronic	Mic	InterAD
rs12721109	chr19_44943712_44944212	APOC4-APOC2	Intronic	Mic	InterAD
rs1132899	chr19_44944583_44945083	APOC2	Promoter	Mic	InterAD
rs2288912	chr19_44945692_44946192	APOC2	Promoter	Mic	InterAD
rs2288911	chr19_44945692_44946192	APOC2	Promoter	Mic	InterAD
rs9304646	chr19_44946996_44947496	APOC2	Exonic	Mic	InterAD
rs7256684	chr19_44948165_44948665	APOC2	Exonic	Mic	InterAD
rs5120	chr19_44948165_44948665	APOC2	Exonic	Mic	InterAD
rs12709888	chr19_44948165_44948665	APOC2	Exonic	Mic	InterAD
rs117612135	chr19_45001198_45001698	RELB	Promoter	Mic	InterAD
rs35194062	chr19_45001775_45002275	RELB	Intronic	Mic	InterAD
rs112170101	chr19_45002359_45002859	RELB	Intronic	Mic	InterAD
rs76856627	chr19_45040334_45040834	CLASRP	Exonic	Mic	InterAD
rs1560725	chr19_45040334_45040834	CLASRP	Exonic	Mic	InterAD
rs117252809	chr19_45454360_45454860	FOSB	Intronic	Mic	InterAD
rs6064392	chr20_56409430_56409930	CASS4	Distal	Mic	InterAD
rs17462136	chr20_56411810_56412310	CASS4	Promoter	Mic	InterAD
rs6014722	chr20_56414768_56415268	CASS4	Intronic	Mic	InterAD
rs6024870	chr20_56422405_56422905	CASS4	Intronic	Mic	InterAD
rs6014724	chr20_56423177_56423677	CASS4	Intronic	Mic	InterAD
rs36138569	chr2_233152480_233152980	ATG16L1	Intronic	OPC	InterAD
rs36172244	chr2_233152480_233152980	ATG16L1	Intronic	OPC	InterAD
rs145770967	chr2_233152480_233152980	ATG16L1	Intronic	OPC	InterAD
rs36148770	chr2_233152480_233152980	ATG16L1	Intronic	OPC	InterAD
rs11728636	chr4_11021303_11021803	CLNK	Distal	OPC	InterAD
rs10267212	chr7_99997440_99997940	ZKSCAN1	Distal	OPC	InterAD
rs10267231	chr7_99997440_99997940	ZKSCAN1	Distal	OPC	InterAD
rs1320164	chr8_94948483_94948983	TP53INP1	Intronic	OPC	InterAD
rs896853	chr8_94948483_94948983	TP53INP1	Intronic	OPC	InterAD
rs896852	chr8_94948483_94948983	TP53INP1	Intronic	OPC	InterAD
rs2879813	chr8_94948483_94948983	TP53INP1	Intronic	OPC	InterAD
rs10097617	chr8_94949159_94949659	TP53INP1	Promoter	OPC	InterAD
rs10108430	chr8_94949159_94949659	TP53INP1	Promoter	OPC	InterAD
rs7176597	chr15_63202232_63202732	RAB8B	Intronic	OPC	InterAD
rs9928448	chr16_30061163_30061663	ALDOA	Intronic	OPC	InterAD
rs56113217	chr17_45849464_45849964	SPPL2C	Intronic	OPC	InterAD
rs56269136	chr17_45849464_45849964	SPPL2C	Intronic	OPC	InterAD
rs62054846	chr17_45861177_45861677	SPPL2C	Intronic	OPC	InterAD
rs55646970	chr17_45861177_45861677	SPPL2C	Intronic	OPC	InterAD
rs55673092	chr17_45861177_45861677	SPPL2C	Intronic	OPC	InterAD
rs62055466	chr17_45864968_45865468	SPPL2C	Intronic	OPC	InterAD
rs62055467	chr17_45864968_45865468	SPPL2C	Intronic	OPC	InterAD
rs56327054	chr17_45866569_45867069	SPPL2C	Intronic	OPC	InterAD
rs56036719	chr17_45866569_45867069	SPPL2C	Intronic	OPC	InterAD
rs55781174	chr17_45866569_45867069	SPPL2C	Intronic	OPC	InterAD
rs12150223	chr17_45866569_45867069	SPPL2C	Intronic	OPC	InterAD
rs12150516	chr17_45867121_45867621	SPPL2C	Intronic	OPC	InterAD
rs62055475	chr17_45867649_45868149	SPPL2C	Intronic	OPC	InterAD
rs62055476	chr17_45867649_45868149	SPPL2C	Intronic	OPC	InterAD
rs17564493	chr17_45923887_45924387	MAPT-IT1	Intronic	OPC	InterAD
rs17649918	chr17_45923887_45924387	MAPT-IT1	Intronic	OPC	InterAD
rs17649954	chr17_45923887_45924387	MAPT-IT1	Intronic	OPC	InterAD
rs62064660	chr17_46001393_46001893	STH	Intronic	OPC	InterAD
rs62064661	chr17_46001393_46001893	STH	Intronic	OPC	InterAD
rs17573447	chr17_46001895_46002395	STH	Intronic	OPC	InterAD
rs62064662	chr17_46001895_46002395	STH	Intronic	OPC	InterAD
rs7221390	chr17_46039507_46040007	STH	Exonic	OPC	InterAD
rs34043286	chr17_46039507_46040007	STH	Exonic	OPC	InterAD
rs62063670	chr17_46045638_46046138	STH	Exonic	OPC	InterAD
rs62060798	chr17_46066290_46066790	STH	Exonic	OPC	InterAD
rs549854089	chr19_44903541_44904041	APOE	Promoter	OPC	InterAD
rs435380	chr19_44903541_44904041	APOE	Promoter	OPC	InterAD
rs3886100	chr1_207565484_207565984	CR1	Intronic	Oli	InterAD
rs4844610	chr1_207628901_207629401	CR1L	Intronic	Oli	InterAD
rs55636820	chr2_127054220_127054720	BIN1	Exonic	Oli	InterAD
rs75131076	chr2_127054220_127054720	BIN1	Exonic	Oli	InterAD
rs77696070	chr2_127054974_127055474	BIN1	Exonic	Oli	InterAD
rs2276582	chr2_127058576_127059076	BIN1	Intronic	Oli	InterAD
rs2276579	chr2_127058576_127059076	BIN1	Intronic	Oli	InterAD
rs934826	chr2_127067973_127068473	BIN1	Exonic	Oli	InterAD
rs80327618	chr2_127071099_127071599	BIN1	Intronic	Oli	InterAD
rs11682128	chr2_127081444_127081944	BIN1	Intronic	Oli	InterAD
rs10194375	chr2_127081978_127082478	BIN1	Intronic	Oli	InterAD
rs55654668	chr2_127102884_127103384	BIN1	Intronic	Oli	InterAD
rs11682186	chr2_127103474_127103974	BIN1	Intronic	Oli	InterAD
rs55646068	chr2_127111667_127112167	BIN1	Distal	Oli	InterAD
rs10182292	chr2_127111667_127112167	BIN1	Distal	Oli	InterAD
rs13029812	chr2_127114553_127115053	BIN1	Distal	Oli	InterAD
rs34745987	chr2_127117426_127117926	BIN1	Distal	Oli	InterAD
rs3845674	chr2_127117426_127117926	BIN1	Distal	Oli	InterAD
rs71414738	chr2_127118316_127118816	BIN1	Distal	Oli	InterAD
rs58570929	chr2_127121586_127122086	BIN1	Distal	Oli	InterAD
rs11904144	chr2_127122214_127122714	BIN1	Distal	Oli	InterAD
rs7559175	chr2_127125859_127126359	BIN1	Distal	Oli	InterAD
rs57724183	chr2_127125859_127126359	BIN1	Distal	Oli	InterAD
rs3823642	chr7_100198258_100198758	PVRIG	Exonic	Oli	InterAD
rs3735241	chr7_100198258_100198758	PVRIG	Exonic	Oli	InterAD
rs866500	chr7_100242523_100243023	CASTOR3	Intronic	Oli	InterAD
rs66969288	chr8_27601982_27602482	MIR6843	Intronic	Oli	InterAD
rs598561	chr11_85941327_85941827	CCDC83	Distal	Oli	InterAD
rs10687788	chr11_86044502_86045002	PICALM	Intronic	Oli	InterAD
rs1237999	chr11_86103836_86104336	PICALM	Distal	Oli	InterAD
rs4944560	chr11_86133600_86134100	PICALM	Distal	Oli	InterAD
rs7110631	chr11_86144955_86145455	PICALM	Distal	Oli	InterAD
rs10898439	chr11_86148435_86148935	PICALM	Distal	Oli	InterAD
rs10898440	chr11_86148435_86148935	PICALM	Distal	Oli	InterAD
rs72962020	chr11_86151664_86152164	PICALM	Distal	Oli	InterAD
rs56157503	chr11_86151664_86152164	PICALM	Distal	Oli	InterAD
rs1427281	chr15_58666884_58667384	ADAM10	Intronic	Oli	InterAD
rs2250583	chr15_58758091_58758591	ADAM10	Distal	Oli	InterAD
rs76253980	chr17_5305962_5306462	RABEP1	Intronic	Oli	InterAD
rs62057147	chr17_45825756_45826256	SPPL2C	Exonic	Oli	InterAD
rs62057148	chr17_45825756_45826256	SPPL2C	Exonic	Oli	InterAD
rs62057149	chr17_45825756_45826256	SPPL2C	Exonic	Oli	InterAD
rs62057150	chr17_45825756_45826256	SPPL2C	Exonic	Oli	InterAD
rs17564020	chr17_45914303_45914803	MAPT-IT1	Intronic	Oli	InterAD
rs55682376	chr17_45914303_45914803	MAPT-IT1	Intronic	Oli	InterAD
rs62062773	chr17_45943138_45943638	MAPT-IT1	Intronic	Oli	InterAD
rs28416808	chr17_45943752_45944252	MAPT-IT1	Intronic	Oli	InterAD
rs62062774	chr17_45943752_45944252	MAPT-IT1	Intronic	Oli	InterAD
rs62062776	chr17_45944394_45944894	MAPT-IT1	Intronic	Oli	InterAD
rs62062270	chr17_46013771_46014271	STH	Intronic	Oli	InterAD
rs41374248	chr17_46042889_46043389	STH	Exonic	Oli	InterAD
rs79252344	chr17_46042889_46043389	STH	Exonic	Oli	InterAD
rs1468240	chr17_46118857_46119357	KANSL1-AS1	Intronic	Oli	InterAD
rs12975656	chr19_1833424_1833924	LOC100288123	Intronic	Oli	InterAD
rs71338744	chr19_45045047_45045547	CLASRP	Intronic	Oli	InterAD
rs112481437	chr19_45045791_45046291	CLASRP	Intronic	Oli	InterAD
rs5843211	chr21_26118522_26119022	APP	Intronic	Oli	InterAD
rs755951	chr8_27368777_27369277	PTK2B	Intronic	Inh	InterAD
rs35505579	chr8_27479046_27479546	CHRNA2	Exonic	Inh	InterAD
rs1800978	chr9_104903434_104903934	ABCA1	Exonic	Inh	InterAD
rs1799777	chr9_104903434_104903934	ABCA1	Exonic	Inh	InterAD
rs592314	chr11_85961704_85962204	CCDC83	Intronic	Inh	InterAD
rs62057107	chr17_45818653_45819153	SPPL2C	Intronic	Inh	InterAD
rs12150390	chr17_45818653_45819153	SPPL2C	Intronic	Inh	InterAD
rs62057111	chr17_45819476_45819976	SPPL2C	Intronic	Inh	InterAD
rs62057112	chr17_45819476_45819976	SPPL2C	Intronic	Inh	InterAD
rs78587102	chr17_45819476_45819976	SPPL2C	Intronic	Inh	InterAD
rs199528	chr17_46765345_46765845	WNT3	Intronic	Inh	InterAD
rs200323909	chr19_44772912_44773412	CBLC	Distal	Inh	InterAD
rs536518226	chr19_45137276_45137776	NKPD1	Intronic	Inh	InterAD
rs1135173	chr2_233146188_233146688	ATG16L1	Exonic	Ext	InterAD
rs36189208	chr2_233146188_233146688	ATG16L1	Exonic	Ext	InterAD
rs36181881	chr2_233146188_233146688	ATG16L1	Exonic	Ext	InterAD
rs143202663	chr6_40897375_40897875	TSPO2	Distal	Ext	InterAD
rs28834970	chr8_27337185_27337685	PTK2B	Intronic	Ext	InterAD
rs4732728	chr8_27583562_27584062	MIR6843	Distal	Ext	InterAD
rs7082102	chr10_80344706_80345206	DYDC2	Intronic	Ext	InterAD
rs7086627	chr10_80460809_80461309	TSPAN14	Intronic	Ext	InterAD
rs2458499	chr11_85948775_85949275	CCDC83	Distal	Ext	InterAD
rs987482	chr11_121494701_121495201	SORL1	Intronic	Ext	InterAD
rs12928610	chr16_30004330_30004830	HIRIP3	Exonic	Ext	InterAD
rs12325400	chr16_30012090_30012590	DOC2A	Exonic	Ext	InterAD
rs11642612	chr16_30018547_30019047	DOC2A	Intronic	Ext	InterAD
rs5848	chr17_44352604_44353104	GRN	Exonic	Ext	InterAD
rs968028	chr17_45703271_45703771	LINC02210	Intronic	Ext	InterAD
rs62056879	chr17_45703798_45704298	LINC02210	Intronic	Ext	InterAD
rs62056811	chr17_45907674_45908174	MAPT-IT1	Intronic	Ext	InterAD
rs17650818	chr17_45959181_45959681	STH	Intronic	Ext	InterAD
rs62063278	chr17_45959181_45959681	STH	Intronic	Ext	InterAD
rs62063279	chr17_45959181_45959681	STH	Intronic	Ext	InterAD
rs62063852	chr17_45997172_45997672	STH	Promoter	Ext	InterAD
rs62063853	chr17_45997172_45997672	STH	Promoter	Ext	InterAD
rs62063854	chr17_45997172_45997672	STH	Promoter	Ext	InterAD
rs79959255	chr17_46000244_46000744	STH	Intronic	Ext	InterAD
rs56301633	chr17_46000244_46000744	STH	Intronic	Ext	InterAD
rs56108300	chr17_46000244_46000744	STH	Intronic	Ext	InterAD
rs12150090	chr17_46038381_46038881	STH	Exonic	Ext	InterAD
rs41437445	chr17_46038381_46038881	STH	Exonic	Ext	InterAD
rs12150320	chr17_46135803_46136303	KANSL1-AS1	Intronic	Ext	InterAD
rs199515	chr17_46779252_46779752	WNT3	Intronic	Ext	InterAD
rs199514	chr17_46779252_46779752	WNT3	Intronic	Ext	InterAD
rs199513	chr17_46779252_46779752	WNT3	Intronic	Ext	InterAD
rs4351	chr17_63492163_63492663	ACE	Intronic	Ext	InterAD
rs147491548	chr19_44968062_44968562	CLPTM1	Intronic	Ext	InterAD
rs16979586	chr19_44968062_44968562	CLPTM1	Intronic	Ext	InterAD
rs59136988	chr19_44968738_44969238	CLPTM1	Intronic	Ext	InterAD
rs754366	chr19_45130161_45130661	NKPD1	Intronic	Ext	InterAD
rs181779730	chr19_45146167_45146667	NKPD1	Exonic	Ext	InterAD
rs78073763	chr19_45146167_45146667	NKPD1	Exonic	Ext	InterAD
rs10207628	chr2_127094114_127094614	BIN1	Intronic	Ast	HighAD
rs10207708	chr2_127094114_127094614	BIN1	Intronic	Ast	HighAD
rs74504435	chr7_54881348_54881848	SEC61G	Distal	Ast	HighAD
rs1727134	chr7_100215760_100216260	PVRIG	Intronic	Ast	HighAD
rs34183059	chr7_100481566_100482066	NYAP1	Distal	Ast	HighAD
rs35146386	chr7_100491987_100492487	NYAP1	Intronic	Ast	HighAD
rs12539172	chr7_100493927_100494427	NYAP1	Exonic	Ast	HighAD
rs7817366	chr8_27594207_27594707	MIR6843	Distal	Ast	HighAD
rs7821500	chr8_27594207_27594707	MIR6843	Distal	Ast	HighAD
rs146954978	chr8_27594207_27594707	MIR6843	Distal	Ast	HighAD
rs35598594	chr8_27594712_27595212	MIR6843	Distal	Ast	HighAD
rs10092082	chr8_27594712_27595212	MIR6843	Distal	Ast	HighAD
rs9331908	chr8_27605939_27606439	MIR6843	Intronic	Ast	HighAD
rs9331905	chr8_27606531_27607031	MIR6843	Intronic	Ast	HighAD
rs11136000	chr8_27606531_27607031	MIR6843	Intronic	Ast	HighAD
rs1532276	chr8_27608619_27609119	MIR6843	Exonic	Ast	HighAD
rs1532277	chr8_27608619_27609119	MIR6843	Exonic	Ast	HighAD
rs1532278	chr8_27608619_27609119	MIR6843	Exonic	Ast	HighAD
rs867232	chr8_27609395_27609895	MIR6843	Intronic	Ast	HighAD
rs867231	chr8_27609395_27609895	MIR6843	Intronic	Ast	HighAD
rs17515931	chr8_27612544_27613044	MIR6843	Intronic	Ast	HighAD
rs530324	chr8_27633568_27634068	SCARA3	Promoter	Ast	HighAD
rs138529507	chr8_27636377_27636877	SCARA3	Intronic	Ast	HighAD
rs3019173	chr8_95008355_95008855	TP53INP1	Intronic	Ast	HighAD
rs1693551	chr8_100663264_100663764	SNX31	Promoter	Ast	HighAD
rs567075	chr11_86119021_86119521	PICALM	Distal	Ast	HighAD
rs1784920	chr11_121566460_121566960	SORL1	Intronic	Ast	HighAD
rs12434433	chr14_105737271_105737771	MIR8071-1	Distal	Ast	HighAD
rs28414135	chr14_105746921_105747421	MIR4539	Distal	Ast	HighAD
rs11858666	chr15_63233691_63234191	APH1B	Intronic	Ast	HighAD
rs35763222	chr15_63348799_63349299	CA12	Intronic	Ast	HighAD
rs4788201	chr16_29961197_29961697	TAOK2	Intronic	Ast	HighAD
rs58217768	chr16_29992340_29992840	INO80E	Exonic	Ast	HighAD
rs11642740	chr16_30049167_30049667	FAM57B	Intronic	Ast	HighAD
rs1864325	chr17_45900434_45900934	MAPT-IT1	Intronic	Ast	HighAD
rs62056795	chr17_45900434_45900934	MAPT-IT1	Intronic	Ast	HighAD
rs62056796	chr17_45900434_45900934	MAPT-IT1	Intronic	Ast	HighAD
rs55691306	chr17_45900434_45900934	MAPT-IT1	Intronic	Ast	HighAD
rs17650417	chr17_45935699_45936199	MAPT-IT1	Intronic	Ast	HighAD
rs62061720	chr17_45935699_45936199	MAPT-IT1	Intronic	Ast	HighAD
rs62061721	chr17_45935699_45936199	MAPT-IT1	Intronic	Ast	HighAD
rs79857651	chr17_45935699_45936199	MAPT-IT1	Intronic	Ast	HighAD
rs113756354	chr17_45935699_45936199	MAPT-IT1	Intronic	Ast	HighAD
rs12150111	chr17_45936337_45936837	MAPT-IT1	Intronic	Ast	HighAD
rs12150460	chr17_45936337_45936837	MAPT-IT1	Intronic	Ast	HighAD
rs62061731	chr17_45940189_45940689	MAPT-IT1	Intronic	Ast	HighAD
rs62061732	chr17_45940189_45940689	MAPT-IT1	Intronic	Ast	HighAD
rs28416808	chr17_45943706_45944206	MAPT-IT1	Intronic	Ast	HighAD
rs62062774	chr17_45943706_45944206	MAPT-IT1	Intronic	Ast	HighAD
rs62062784	chr17_45946922_45947422	MAPT-IT1	Intronic	Ast	HighAD
rs62062785	chr17_45946922_45947422	MAPT-IT1	Intronic	Ast	HighAD
rs62062786	chr17_45946922_45947422	MAPT-IT1	Intronic	Ast	HighAD
rs62062794	chr17_45948971_45949471	STH	Intronic	Ast	HighAD
rs242561	chr17_45948971_45949471	STH	Intronic	Ast	HighAD
rs55821155	chr17_45954871_45955371	STH	Intronic	Ast	HighAD
rs56080482	chr17_45954871_45955371	STH	Intronic	Ast	HighAD
rs17571718	chr17_45955377_45955877	STH	Intronic	Ast	HighAD
rs78555354	chr17_45955377_45955877	STH	Intronic	Ast	HighAD
rs17571739	chr17_45955377_45955877	STH	Intronic	Ast	HighAD
rs62062813	chr17_45955377_45955877	STH	Intronic	Ast	HighAD
rs62063262	chr17_45955377_45955877	STH	Intronic	Ast	HighAD
rs113520245	chr17_45955377_45955877	STH	Intronic	Ast	HighAD
rs113277432	chr17_45955377_45955877	STH	Intronic	Ast	HighAD
rs112950348	chr17_45955377_45955877	STH	Intronic	Ast	HighAD
rs62063775	chr17_45973280_45973780	STH	Exonic	Ast	HighAD
rs62063776	chr17_45973280_45973780	STH	Exonic	Ast	HighAD
rs78104015	chr17_45974957_45975457	STH	Exonic	Ast	HighAD
rs62063777	chr17_45975602_45976102	STH	Exonic	Ast	HighAD
rs2217394	chr17_45975602_45976102	STH	Exonic	Ast	HighAD
rs17651857	chr17_45992228_45992728	STH	Intronic	Ast	HighAD
rs74759276	chr17_45992228_45992728	STH	Intronic	Ast	HighAD
rs17651887	chr17_45992228_45992728	STH	Intronic	Ast	HighAD
rs78599197	chr17_45992228_45992728	STH	Intronic	Ast	HighAD
rs62064664	chr17_46003872_46004372	STH	Intronic	Ast	HighAD
rs62064665	chr17_46003872_46004372	STH	Intronic	Ast	HighAD
rs4366	chr17_63497620_63498120	ACE	Exonic	Ast	HighAD
rs12975656	chr19_1833562_1834062	LOC100288123	Intronic	Ast	HighAD
rs11669170	chr19_1833562_1834062	LOC100288123	Intronic	Ast	HighAD
rs56198711	chr19_44718022_44718522	CEACAM16	Distal	Ast	HighAD
rs79638902	chr19_44718022_44718522	CEACAM16	Distal	Ast	HighAD
rs4802235	chr19_44721266_44721766	CEACAM16	Distal	Ast	HighAD
rs187010311	chr19_44774595_44775095	CBLC	Distal	Ast	HighAD
rs569705402	chr19_44784305_44784805	CBLC	Intronic	Ast	HighAD
rs574578352	chr19_44796695_44797195	BCAM	Intronic	Ast	HighAD
rs200210470	chr19_44799854_44800354	BCAM	Intronic	Ast	HighAD
rs10418198	chr19_44799854_44800354	BCAM	Intronic	Ast	HighAD
rs187556678	chr19_44799854_44800354	BCAM	Intronic	Ast	HighAD
rs73048258	chr19_44807849_44808349	BCAM	Promoter	Ast	HighAD
rs149626525	chr19_44807849_44808349	BCAM	Promoter	Ast	HighAD
rs560898656	chr19_44807849_44808349	BCAM	Promoter	Ast	HighAD
rs1871047	chr19_44848376_44848876	NECTIN2	Intronic	Ast	HighAD
rs1871046	chr19_44848376_44848876	NECTIN2	Intronic	Ast	HighAD
rs446037	chr19_44904146_44904646	APOE	Promoter	Ast	HighAD
rs434132	chr19_44904146_44904646	APOE	Promoter	Ast	HighAD
rs769448	chr19_44906316_44906816	APOE	Exonic	Ast	HighAD
rs769452	chr19_44907552_44908052	APOE	Exonic	Ast	HighAD
rs1081106	chr19_44909750_44910250	APOE	Distal	Ast	HighAD
rs72654437	chr19_44912820_44913320	APOC1	Promoter	Ast	HighAD
rs7257468	chr19_44949790_44950290	APOC2	Distal	Ast	HighAD
rs7258345	chr19_44949790_44950290	APOC2	Distal	Ast	HighAD
rs7257476	chr19_44949790_44950290	APOC2	Distal	Ast	HighAD
rs12709889	chr19_44949790_44950290	APOC2	Distal	Ast	HighAD
rs10402642	chr19_44950443_44950943	CLPTM1	Distal	Ast	HighAD
rs7248162	chr19_44951240_44951740	CLPTM1	Distal	Ast	HighAD
rs7247227	chr19_44951240_44951740	CLPTM1	Distal	Ast	HighAD
rs7247551	chr19_44951240_44951740	CLPTM1	Distal	Ast	HighAD
rs892101	chr19_44951928_44952428	CLPTM1	Distal	Ast	HighAD
rs1882752	chr19_44958035_44958535	CLPTM1	Intronic	Ast	HighAD
rs35194062	chr19_45001766_45002266	RELB	Intronic	Ast	HighAD
rs117034857	chr19_45455620_45456120	FOSB	Intronic	Ast	HighAD
rs11585858	chr1_161185933_161186433	B4GALT3	Exonic	Mic	HighAD
rs2070901	chr1_161215008_161215508	FCER1G	Promoter	Mic	HighAD
rs2070902	chr1_161217866_161218366	FCER1G	Intronic	Mic	HighAD
rs13025717	chr2_127128335_127128835	BIN1	Distal	Mic	HighAD
rs13025765	chr2_127128335_127128835	BIN1	Distal	Mic	HighAD
rs12618593	chr2_127128335_127128835	BIN1	Distal	Mic	HighAD
rs113112754	chr2_127132774_127133274	BIN1	Distal	Mic	HighAD
rs4663104	chr2_127132774_127133274	BIN1	Distal	Mic	HighAD
rs35968837	chr2_127133303_127133803	BIN1	Distal	Mic	HighAD
rs34546266	chr2_127133303_127133803	BIN1	Distal	Mic	HighAD
rs60572885	chr2_127133303_127133803	BIN1	Distal	Mic	HighAD
rs56193035	chr2_127133303_127133803	BIN1	Distal	Mic	HighAD
rs57109420	chr2_127133303_127133803	BIN1	Distal	Mic	HighAD
rs59253801	chr2_127133870_127134370	BIN1	Distal	Mic	HighAD
rs59176034	chr2_127133870_127134370	BIN1	Distal	Mic	HighAD
rs72838284	chr2_127133870_127134370	BIN1	Distal	Mic	HighAD
rs72838285	chr2_127133870_127134370	BIN1	Distal	Mic	HighAD
rs34779859	chr2_127135117_127135617	BIN1	Distal	Mic	HighAD
rs6733839	chr2_127135117_127135617	BIN1	Distal	Mic	HighAD
rs72838287	chr2_127135117_127135617	BIN1	Distal	Mic	HighAD
rs72838288	chr2_127135117_127135617	BIN1	Distal	Mic	HighAD
rs730482	chr2_127136536_127137036	BIN1	Distal	Mic	HighAD
rs893434	chr2_127137104_127137604	BIN1	Distal	Mic	HighAD
rs893433	chr2_127137104_127137604	BIN1	Distal	Mic	HighAD
rs893432	chr2_127137104_127137604	BIN1	Distal	Mic	HighAD
rs10171658	chr2_233114656_233115156	INPP5D	Intronic	Mic	HighAD
rs10933431	chr2_233116934_233117434	INPP5D	Intronic	Mic	HighAD
rs10933432	chr2_233116934_233117434	INPP5D	Intronic	Mic	HighAD
rs6715767	chr2_233165872_233166372	ATG16L1	Intronic	Mic	HighAD
rs61367113	chr5_86967044_86967544	LOC101929380	Promoter	Mic	HighAD
rs62375391	chr5_86997330_86997830	LOC101929380	Intronic	Mic	HighAD
rs62375397	chr5_87002303_87002803	LOC101929380	Intronic	Mic	HighAD
rs113706587	chr5_180200936_180201436	RASGEF1C	Intronic	Mic	HighAD
rs9268627	chr6_32437857_32438357	HLA-DRA	Promoter	Mic	HighAD
rs7773030	chr6_32473354_32473854	HLA-DRA	Distal	Mic	HighAD
rs614348	chr6_32606088_32606588	HLA-DRB1	Distal	Mic	HighAD
rs2760994	chr6_32606088_32606588	HLA-DRB1	Distal	Mic	HighAD
rs535852	chr6_32609764_32610264	HLA-DRB1	Distal	Mic	HighAD
rs532965	chr6_32609764_32610264	HLA-DRB1	Distal	Mic	HighAD
rs9271579	chr6_32622365_32622865	HLA-DQA1	Distal	Mic	HighAD
rs9271580	chr6_32622365_32622865	HLA-DQA1	Distal	Mic	HighAD
rs9271608	chr6_32623670_32624170	HLA-DQA1	Distal	Mic	HighAD
rs9275213	chr6_32690150_32690650	HLA-DQB1	Distal	Mic	HighAD
rs9275223	chr6_32691961_32692461	HLA-DQB1	Distal	Mic	HighAD
rs9275373	chr6_32700449_32700949	HLA-DQB1	Distal	Mic	HighAD
rs2858331	chr6_32713174_32713674	HLA-DQA2	Distal	Mic	HighAD
rs143332484	chr6_41161233_41161733	TREM2	Exonic	Mic	HighAD
rs75932628	chr6_41161233_41161733	TREM2	Exonic	Mic	HighAD
rs9357347	chr6_41182551_41183051	TREML2	Distal	Mic	HighAD
rs3800342	chr6_41191546_41192046	TREML2	Exonic	Mic	HighAD
rs4714447	chr6_41271772_41272272	TREM1	Distal	Mic	HighAD
rs9648346	chr7_28120258_28120758	JAZF1-AS1	Intronic	Mic	HighAD
rs13230744	chr7_100199866_100200366	PVRIG	Intronic	Mic	HighAD
rs1859788	chr7_100373784_100374284	PILRA	Intronic	Mic	HighAD
rs10255133	chr7_100384608_100385108	PILRA	Intronic	Mic	HighAD
rs12703526	chr7_143410406_143410906	EPHA1	Promoter	Mic	HighAD
rs11762262	chr7_143410406_143410906	EPHA1	Promoter	Mic	HighAD
rs11769559	chr7_143413820_143414320	EPHA1	Intronic	Mic	HighAD
rs1320164	chr8_94948312_94948812	TP53INP1	Intronic	Mic	HighAD
rs896853	chr8_94948312_94948812	TP53INP1	Intronic	Mic	HighAD
rs896852	chr8_94948312_94948812	TP53INP1	Intronic	Mic	HighAD
rs2879813	chr8_94948312_94948812	TP53INP1	Intronic	Mic	HighAD
rs10097617	chr8_94949199_94949699	TP53INP1	Promoter	Mic	HighAD
rs10108430	chr8_94949199_94949699	TP53INP1	Promoter	Mic	HighAD
rs7003387	chr8_94949712_94950212	TP53INP1	Promoter	Mic	HighAD
rs6982393	chr8_94968343_94968843	TP53INP1	Intronic	Mic	HighAD
rs77892763	chr10_11672381_11672881	USP6NL	Distal	Mic	HighAD
rs7896832	chr10_80497705_80498205	LOC101929574	Intronic	Mic	HighAD
rs7096909	chr10_80524381_80524881	LOC101929574	Exonic	Mic	HighAD
rs10838702	chr11_47389027_47389527	SPI1	Distal	Mic	HighAD
rs1377416	chr11_47394786_47395286	MIR4487	Distal	Mic	HighAD
rs10769263	chr11_47395498_47395998	MIR4487	Distal	Mic	HighAD
rs17602572	chr11_60180663_60181163	MS4A6A	Exonic	Mic	HighAD
rs632185	chr11_60183737_60184237	MS4A6A	Intronic	Mic	HighAD
rs55661415	chr11_60184717_60185217	MS4A6A	Promoter	Mic	HighAD
rs1820430	chr11_60185815_60186315	MS4A6A	Promoter	Mic	HighAD
rs584469	chr11_60221155_60221655	MIR6503	Distal	Mic	HighAD
rs657928	chr11_60221155_60221655	MIR6503	Distal	Mic	HighAD
rs3038672	chr11_60221155_60221655	MIR6503	Distal	Mic	HighAD
rs718376	chr11_60235269_60235769	MIR6503	Distal	Mic	HighAD
rs34862992	chr11_60251405_60251905	MS4A4A	Distal	Mic	HighAD
rs636317	chr11_60251405_60251905	MS4A4A	Distal	Mic	HighAD
rs636341	chr11_60251405_60251905	MS4A4A	Distal	Mic	HighAD
rs672399	chr11_60252608_60253108	MS4A4A	Distal	Mic	HighAD
rs1365247	chr11_60259803_60260303	MS4A4A	Distal	Mic	HighAD
rs7128450	chr11_60263308_60263808	MS4A4A	Distal	Mic	HighAD
rs12421663	chr11_60267626_60268126	MS4A4A	Distal	Mic	HighAD
rs7103808	chr11_60310549_60311049	MS4A6E	Distal	Mic	HighAD
rs61900467	chr11_60310549_60311049	MS4A6E	Distal	Mic	HighAD
rs12792791	chr11_60314880_60315380	MS4A6E	Distal	Mic	HighAD
rs2868121	chr11_60332892_60333392	MS4A6E	Promoter	Mic	HighAD
rs10897049	chr11_60332892_60333392	MS4A6E	Promoter	Mic	HighAD
rs4477457	chr11_60332892_60333392	MS4A6E	Promoter	Mic	HighAD
rs10792265	chr11_60332892_60333392	MS4A6E	Promoter	Mic	HighAD
rs7116069	chr11_60332892_60333392	MS4A6E	Promoter	Mic	HighAD
rs10589376	chr11_86058169_86058669	PICALM	Intronic	Mic	HighAD
rs867611	chr11_86065130_86065630	PICALM	Intronic	Mic	HighAD
rs598726	chr11_86117321_86117821	PICALM	Distal	Mic	HighAD
rs474479	chr11_86117321_86117821	PICALM	Distal	Mic	HighAD
rs10898436	chr11_86130105_86130605	PICALM	Distal	Mic	HighAD
rs36233256	chr11_86130105_86130605	PICALM	Distal	Mic	HighAD
rs3844143	chr11_86138811_86139311	PICALM	Distal	Mic	HighAD
rs2374702	chr11_86141095_86141595	PICALM	Distal	Mic	HighAD
rs10792831	chr11_86141602_86142102	PICALM	Distal	Mic	HighAD
rs2888903	chr11_86143064_86143564	PICALM	Distal	Mic	HighAD
rs72962020	chr11_86151608_86152108	PICALM	Distal	Mic	HighAD
rs56157503	chr11_86151608_86152108	PICALM	Distal	Mic	HighAD
rs10792832	chr11_86156535_86157035	PICALM	Distal	Mic	HighAD
rs10898441	chr11_86157037_86157537	EED	Distal	Mic	HighAD
rs3901732	chr11_86162243_86162743	EED	Distal	Mic	HighAD
rs11603136	chr11_86163101_86163601	EED	Distal	Mic	HighAD
rs74685827	chr11_121481974_121482474	SORL1	Intronic	Mic	HighAD
rs75279208	chr11_121575215_121575715	SORL1	Intronic	Mic	HighAD
rs1620130	chr11_121575799_121576299	SORL1	Intronic	Mic	HighAD
rs117807585	chr11_121585193_121585693	SORL1	Intronic	Mic	HighAD
rs12588482	chr14_52844584_52845084	GNPNAT1	Distal	Mic	HighAD
rs4904918	chr14_92460743_92461243	RIN3	Intronic	Mic	HighAD
rs4900124	chr14_92466027_92466527	RIN3	Intronic	Mic	HighAD
rs4904922	chr14_92466027_92466527	RIN3	Intronic	Mic	HighAD
rs4904923	chr14_92466027_92466527	RIN3	Intronic	Mic	HighAD
rs10130373	chr14_92466027_92466527	RIN3	Intronic	Mic	HighAD
rs12881735	chr14_92466027_92466527	RIN3	Intronic	Mic	HighAD
rs12880508	chr14_92466027_92466527	RIN3	Intronic	Mic	HighAD
rs61977322	chr14_92490463_92490963	RIN3	Intronic	Mic	HighAD
rs9931998	chr16_81738797_81739297	PLCG2	Promoter	Mic	HighAD
rs12446781	chr16_81739416_81739916	PLCG2	Intronic	Mic	HighAD
rs12444183	chr16_81739416_81739916	PLCG2	Intronic	Mic	HighAD
rs12444189	chr16_81739416_81739916	PLCG2	Intronic	Mic	HighAD
rs4407053	chr16_81740099_81740599	PLCG2	Intronic	Mic	HighAD
rs4544235	chr16_81740099_81740599	PLCG2	Intronic	Mic	HighAD
rs34716007	chr17_5166099_5166599	ZNF594	Intronic	Mic	HighAD
rs75511804	chr17_5234586_5235086	SCIMP	Promoter	Mic	HighAD
rs2158257	chr17_46026567_46027067	STH	Exonic	Mic	HighAD
rs2141299	chr17_46163200_46163700	KANSL1-AS1	Intronic	Mic	HighAD
rs2526377	chr17_58332356_58332856	MIR142	Promoter	Mic	HighAD
rs1057874	chr19_1038262_1038762	ABCA7	Promoter	Mic	HighAD
rs112131072	chr19_1066173_1066673	ARHGAP45	Intronic	Mic	HighAD
rs11668832	chr19_1812494_1812994	ATP8B3	Promoter	Mic	HighAD
rs144928608	chr19_44636053_44636553	PVR	Intronic	Mic	HighAD
rs186719419	chr19_44722241_44722741	CEACAM16	Distal	Mic	HighAD
rs2927487	chr19_44722241_44722741	CEACAM16	Distal	Mic	HighAD
rs150820726	chr19_44723809_44724309	BCL3	Distal	Mic	HighAD
rs2965102	chr19_44732579_44733079	BCL3	Distal	Mic	HighAD
rs56978169	chr19_44732579_44733079	BCL3	Distal	Mic	HighAD
rs77775146	chr19_44736666_44737166	BCL3	Distal	Mic	HighAD
rs17728272	chr19_44736666_44737166	BCL3	Distal	Mic	HighAD
rs1531517	chr19_44738707_44739207	BCL3	Distal	Mic	HighAD
rs191805311	chr19_44741304_44741804	BCL3	Distal	Mic	HighAD
rs749005643	chr19_44747839_44748339	BCL3	Exonic	Mic	HighAD
rs531660643	chr19_44748482_44748982	BCL3	Exonic	Mic	HighAD
rs10426423	chr19_44844674_44845174	NECTIN2	Promoter	Mic	HighAD
rs77241309	chr19_44845731_44846231	NECTIN2	Promoter	Mic	HighAD
rs2927472	chr19_44845731_44846231	NECTIN2	Promoter	Mic	HighAD
rs3810143	chr19_44845731_44846231	NECTIN2	Promoter	Mic	HighAD
rs41289514	chr19_44856341_44856841	NECTIN2	Intronic	Mic	HighAD
rs183610051	chr19_44856341_44856841	NECTIN2	Intronic	Mic	HighAD
rs549854089	chr19_44903529_44904029	APOE	Promoter	Mic	HighAD
rs435380	chr19_44903529_44904029	APOE	Promoter	Mic	HighAD
rs140526515	chr19_44924037_44924537	APOC1	Distal	Mic	HighAD
rs565334527	chr19_44925366_44925866	APOC1	Distal	Mic	HighAD
rs10424663	chr19_44925366_44925866	APOC1	Distal	Mic	HighAD
rs5112	chr19_44926988_44927488	APOC1	Distal	Mic	HighAD
rs5157	chr19_44943729_44944229	APOC4-APOC2	Intronic	Mic	HighAD
rs12721109	chr19_44943729_44944229	APOC4-APOC2	Intronic	Mic	HighAD
rs1132899	chr19_44944747_44945247	APOC2	Promoter	Mic	HighAD
rs5167	chr19_44944747_44945247	APOC2	Promoter	Mic	HighAD
rs2288912	chr19_44945736_44946236	APOC2	Promoter	Mic	HighAD
rs2288911	chr19_44945736_44946236	APOC2	Promoter	Mic	HighAD
rs9304646	chr19_44946998_44947498	APOC2	Exonic	Mic	HighAD
rs4803774	chr19_44947586_44948086	APOC2	Intronic	Mic	HighAD
rs4803775	chr19_44947586_44948086	APOC2	Intronic	Mic	HighAD
rs563496704	chr19_44947586_44948086	APOC2	Intronic	Mic	HighAD
rs12709888	chr19_44948384_44948884	APOC2	Intronic	Mic	HighAD
rs76856627	chr19_45040395_45040895	CLASRP	Exonic	Mic	HighAD
rs1560725	chr19_45040395_45040895	CLASRP	Exonic	Mic	HighAD
rs117252809	chr19_45454399_45454899	FOSB	Intronic	Mic	HighAD
rs6064392	chr20_56409455_56409955	CASS4	Distal	Mic	HighAD
rs17462136	chr20_56411799_56412299	CASS4	Promoter	Mic	HighAD
rs6014722	chr20_56414769_56415269	CASS4	Intronic	Mic	HighAD
rs6024870	chr20_56422444_56422944	CASS4	Intronic	Mic	HighAD
rs36172244	chr2_233152531_233153031	ATG16L1	Intronic	OPC	HighAD
rs145770967	chr2_233152531_233153031	ATG16L1	Intronic	OPC	HighAD
rs36148770	chr2_233152531_233153031	ATG16L1	Intronic	OPC	HighAD
rs36149367	chr2_233152531_233153031	ATG16L1	Intronic	OPC	HighAD
rs11728636	chr4_11021231_11021731	CLNK	Distal	OPC	HighAD
rs34256128	chr7_100004311_100004811	ZKSCAN1	Distal	OPC	HighAD
rs9928448	chr16_30061160_30061660	ALDOA	Intronic	OPC	HighAD
rs62055950	chr17_45775452_45775952	CRHR1	Intronic	OPC	HighAD
rs56043078	chr17_45775452_45775952	CRHR1	Intronic	OPC	HighAD
rs62054846	chr17_45861236_45861736	SPPL2C	Intronic	OPC	HighAD
rs55646970	chr17_45861236_45861736	SPPL2C	Intronic	OPC	HighAD
rs55673092	chr17_45861236_45861736	SPPL2C	Intronic	OPC	HighAD
rs62055461	chr17_45863695_45864195	SPPL2C	Intronic	OPC	HighAD
rs62055462	chr17_45863695_45864195	SPPL2C	Intronic	OPC	HighAD
rs62055463	chr17_45863695_45864195	SPPL2C	Intronic	OPC	HighAD
rs12150516	chr17_45867151_45867651	SPPL2C	Intronic	OPC	HighAD
rs62055475	chr17_45867696_45868196	SPPL2C	Intronic	OPC	HighAD
rs62055476	chr17_45867696_45868196	SPPL2C	Intronic	OPC	HighAD
rs78637438	chr17_45868408_45868908	SPPL2C	Intronic	OPC	HighAD
rs2316771	chr17_45868408_45868908	SPPL2C	Intronic	OPC	HighAD
rs62055478	chr17_45868408_45868908	SPPL2C	Intronic	OPC	HighAD
rs1078830	chr17_45868408_45868908	SPPL2C	Intronic	OPC	HighAD
rs17573447	chr17_46001793_46002293	STH	Intronic	OPC	HighAD
rs62063670	chr17_46045584_46046084	STH	Exonic	OPC	HighAD
rs62060798	chr17_46066297_46066797	STH	Exonic	OPC	HighAD
rs3886100	chr1_207565492_207565992	CR1	Intronic	Oli	HighAD
rs10194375	chr2_127081978_127082478	BIN1	Intronic	Oli	HighAD
rs11682186	chr2_127103492_127103992	BIN1	Intronic	Oli	HighAD
rs76516995	chr2_127107062_127107562	BIN1	Promoter	Oli	HighAD
rs78710909	chr2_127107062_127107562	BIN1	Promoter	Oli	HighAD
rs13032148	chr2_127107062_127107562	BIN1	Promoter	Oli	HighAD
rs77260225	chr2_127107062_127107562	BIN1	Promoter	Oli	HighAD
rs4494685	chr2_127109837_127110337	BIN1	Distal	Oli	HighAD
rs13400939	chr2_127111176_127111676	BIN1	Distal	Oli	HighAD
rs34555108	chr2_127115302_127115802	BIN1	Distal	Oli	HighAD
rs4663098	chr2_127115302_127115802	BIN1	Distal	Oli	HighAD
rs7557280	chr2_127115302_127115802	BIN1	Distal	Oli	HighAD
rs71414738	chr2_127118333_127118833	BIN1	Distal	Oli	HighAD
rs58570929	chr2_127121555_127122055	BIN1	Distal	Oli	HighAD
rs598561	chr11_85941319_85941819	CCDC83	Distal	Oli	HighAD
rs1237999	chr11_86103813_86104313	PICALM	Distal	Oli	HighAD
rs11234552	chr11_86134903_86135403	PICALM	Distal	Oli	HighAD
rs10898439	chr11_86148407_86148907	PICALM	Distal	Oli	HighAD
rs10898440	chr11_86148407_86148907	PICALM	Distal	Oli	HighAD
rs183428733	chr15_49903549_49904049	SLC27A2	Intronic	Oli	HighAD
rs1427281	chr15_58666872_58667372	ADAM10	Intronic	Oli	HighAD
rs62057147	chr17_45825788_45826288	SPPL2C	Exonic	Oli	HighAD
rs62057148	chr17_45825788_45826288	SPPL2C	Exonic	Oli	HighAD
rs62057149	chr17_45825788_45826288	SPPL2C	Exonic	Oli	HighAD
rs62057150	chr17_45825788_45826288	SPPL2C	Exonic	Oli	HighAD
[truncated: 78 more rows]

## Sheet: Table_S5_legend
Supplemental Table S5: Supplemental_Table_S5.xlsx List of AD–associated genes obtained by integrating AD-significant SNPs with cell type– resolved candidate cis-regulatory elements (cCREs), including genomic peak locations, nearest genes, peak types, cell types, and AD stages.
