# Supplementary material for: Cell type–specific gene regulatory atlas prioritizes drug targets and repurposable medicines in Alzheimer's disease
Source: HighWire-hosted journal article supplement (doi:10.1101/gr.280436.125), 2026-01-21
Supplement: Supplemental_Table_S6.xlsx [file Supplemental_Table_S6.xlsx]

## Sheet: Supplemental_Table_S6
rsid	chr	position_b38	other_allele	effect_allele	beta	se	pval	eaf	n_cases	n_controls	N	outcome
rs2070902	1	161217875	C	T	-0.0537	0.0094	1.05E-08	0.2539	85934	401577	487511	AD_Bellenguez_2022N
rs6733839	2	127135234	C	T	0.1686	0.0084	6.48E-90	0.3891	85934	401577	487511	AD_Bellenguez_2022N
rs10933431	2	233117202	G	C	0.0852	0.0099	1.04E-17	0.7657	85665	400902	486567	AD_Bellenguez_2022N
rs62375397	5	87002714	C	T	0.0746	0.01	8.58E-14	0.2104	85934	401577	487511	AD_Bellenguez_2022N
rs113706587	5	180201150	G	A	0.0925	0.0133	3.38E-12	0.1103	85934	401577	487511	AD_Bellenguez_2022N
rs143332484	6	41161469	C	T	0.3346	0.0376	6.04E-19	0.0126	85665	400902	486567	AD_Bellenguez_2022N
rs74504435	7	54881563	G	A	0.0842	0.0141	2.05E-09	0.9065	85934	401577	487511	AD_Bellenguez_2022N
rs11769559	7	143414203	C	T	0.0695	0.0085	4.00E-16	0.5941	84196	393797	477993	AD_Bellenguez_2022N
rs1693551	8	100663356	C	T	-0.0459	0.0081	1.79E-08	0.5328	85934	401577	487511	AD_Bellenguez_2022N
rs10792832	11	86156833	G	A	-0.1056	0.0084	6.33E-36	0.3578	85934	401577	487511	AD_Bellenguez_2022N
rs74685827	11	121482368	G	T	-0.1964	0.0303	8.63E-11	0.9814	85665	400902	486567	AD_Bellenguez_2022N
rs2009833	15	49901356	G	A	-0.0478	0.0086	3.11E-08	0.3683	85934	401577	487511	AD_Bellenguez_2022N
rs12444183	16	81739604	G	A	-0.0591	0.0084	2.21E-12	0.3872	85934	401577	487511	AD_Bellenguez_2022N
rs5848	17	44352876	C	T	0.0646	0.0092	1.76E-12	0.2886	85934	401577	487511	AD_Bellenguez_2022N
rs4292	17	63476980	C	T	0.0688	0.0084	3.47E-16	0.617	85934	401577	487511	AD_Bellenguez_2022N
rs12972720	19	1854152	G	C	-0.0516	0.009	9.90E-09	0.5208	85665	400902	486567	AD_Bellenguez_2022N
rs147211387	19	44758498	G	A	0.2526	0.0406	4.88E-10	0.0156	85502	400497	485999	AD_Bellenguez_2022N
rs76856627	19	45040497	G	A	-0.2227	0.0242	3.95E-20	0.9666	85665	400902	486567	AD_Bellenguez_2022N
rs536518226	19	45137507	G	C	0.39	0.0388	1.01E-23	0.0129	85502	400497	485999	AD_Bellenguez_2022N
rs117034857	19	45456064	G	A	0.882	0.0936	4.25E-21	0.0053	71269	366205	437474	AD_Bellenguez_2022N
rs6014724	20	56423488	G	A	0.1176	0.0145	4.84E-16	0.9102	85934	401577	487511	AD_Bellenguez_2022N
rs4690197	4	960186	G	T	-0.0586	0.0102	8.39E-09	0.1997	85934	401577	487511	AD_Bellenguez_2022N
rs1800978	9	104903697	G	C	-0.0682	0.0121	1.61E-08	0.87	85934	401577	487511	AD_Bellenguez_2022N
rs11218343	11	121564878	C	T	0.1654	0.0214	1.01E-14	0.961	85934	401577	487511	AD_Bellenguez_2022N

## Sheet: Table_S6_legend
Supplemental Table S6: Supplemental_Table_S6.xlsx Summary of AD–associated lead SNPs, reporting chromosomal coordinates, effect and non-effect alleles, effect sizes (β), standard errors, p-values, effect allele frequencies (EAF), and cohort sample sizes for cases and controls.
