# Supplementary material for: Cell type–specific gene regulatory atlas prioritizes drug targets and repurposable medicines in Alzheimer's disease
Source: HighWire-hosted journal article supplement (doi:10.1101/gr.280436.125), 2026-01-21
Supplement: Supplemental_Table_S7.xlsx [file Supplemental_Table_S7.xlsx]

## Sheet: Supplemental_Table_S7
symbol	LS	Correlation	FDR	mLog10pval	TF	Stage	Cell
RALYL	16.1407	0.899137	1.64519753296548e-178	2.60921	ATOH7	High	Ext
MICAL2	35.6845	0.884014	2.06052060989467e-164	2.25927	ATOH7	High	Ext
KCNV1	39.8085	0.873131	1.89914115234186e-155	3.959	ATOH7	High	Ext
DLGAP1-AS4	33.0054	0.857757	4.14742798593688e-144	2.4666	ATOH7	High	Ext
WASF1	32.0443	0.853103	6.1505528028756e-141	2.02034	ATOH7	High	Ext
PDP1	16.6467	0.841042	3.38186306442005e-133	2.15733	ATOH7	High	Ext
PAIP1	11.4349	0.830523	5.93104752023136e-127	3.60444	ATOH7	High	Ext
ST7	11.1502	0.829071	3.98845679359417e-126	2.8571	ATOH7	High	Ext
GNB5	24.6778	0.820111	3.47433717280903e-121	2.19391	ATOH7	High	Ext
PRICKLE1	13.2543	0.818131	3.93831004631085e-120	2.08576	ATOH7	High	Ext
TMEM67	17.3067	0.817742	6.32461267708355e-120	2.87244	ATOH7	High	Ext
MYO5C	32.3658	0.81223	4.61355916549112e-117	2.05339	ATOH7	High	Ext
JAZF1-AS1	23.831	0.796791	1.58820917845896e-109	2.79344	ATOH7	High	Ext
SYBU	22.9211	0.796756	1.64897109836771e-109	3.14517	ATOH7	High	Ext
LINC02613	10.4868	0.795423	6.86613200047071e-109	2.31657	ATOH7	High	Ext
MDH1	9.50963	0.793803	3.8363030568399e-108	2.10606	ATOH7	High	Ext
CERNA1	27.1208	0.785921	1.33490652130071e-104	2.02034	ATOH7	High	Ext
RFTN1	63.459	0.785663	1.73198351650829e-104	5.12607	ATOH7	High	Ext
MIS18A	16.6133	0.785363	2.34723648516814e-104	3.60444	ATOH7	High	Ext
SLC17A6	12.1697	0.78113	1.6041599045921e-102	2.50293	ATOH7	High	Ext
DLGAP1-AS3	19.3409	0.765515	4.29669439546013e-96	2.02034	ATOH7	High	Ext
LINC00710	17.4073	0.751655	8.5449921142653e-91	2.82591	ATOH7	High	Ext
PHACTR1	36.3442	0.748424	1.30784842988901e-89	4.81039	ATOH7	High	Ext
OLFM3	22.5627	0.738144	5.90959421823656e-86	4.68501	ATOH7	High	Ext
LINC01950	8.83276	0.735209	6.07768608855686e-85	2.27532	ATOH7	High	Ext
CDC40	32.4097	0.715065	2.41201808678774e-78	2.15746	ATOH7	High	Ext
PKIG	26.2782	0.708359	2.83750974679691e-76	2.95606	ATOH7	High	Ext
GTF3C1	20.5784	0.706172	1.30431133471735e-75	2.31657	ATOH7	High	Ext
KCNK1	13.4791	0.701774	2.68526208247101e-74	2.18292	ATOH7	High	Ext
ARPP19	18.5386	0.672686	3.53360143191228e-66	2.23403	ATOH7	High	Ext
ERVMER34-1	10.0315	0.66638	1.53822443026486e-64	2.60921	ATOH7	High	Ext
PPIL6	17.0697	0.661449	2.75778385303165e-63	2.60921	ATOH7	High	Ext
LINC01793	14.3989	0.65087	1.12825007125041e-60	3.17271	ATOH7	High	Ext
SHC3	11.9075	0.643677	5.87580798808889e-59	2.08576	ATOH7	High	Ext
LINC01618	9.93034	0.605942	1.17207490537482e-50	3.00432	ATOH7	High	Ext
PTK2B	19.8337	0.598647	3.52897881305241e-49	2.13487	ATOH7	High	Ext
DDX19A	9.14833	0.59853	3.72482157603264e-49	2.27532	ATOH7	High	Ext
ZBTB21	14.0709	0.595047	1.83514841672043e-48	2.50293	ATOH7	High	Ext
BCL11A	24.6591	0.57193	4.48644916455355e-44	2.1767	ATOH7	High	Ext
SLC39A8	14.9483	0.545394	1.90154786910805e-39	4.69785	ATOH7	High	Ext
AK5	13.7361	0.540939	1.03792422665809e-38	2.15733	ATOH7	High	Ext
ADGRF5	10.7638	0.52916	8.16490754742062e-37	2.49031	ATOH7	High	Ext
PPAT	10.2652	0.52596	2.59608574160348e-36	2.50293	ATOH7	High	Ext
RALYL	20.0051	0.895857	2.84938145842549e-175	2.71216	BHLHE22	High	Ext
SH3GL2	35.1255	0.892282	7.3136142867168e-172	2.82508	BHLHE22	High	Ext
KCNV1	37.0373	0.887311	2.5981576343156e-167	2.26069	BHLHE22	High	Ext
PRKAR2B	19.2797	0.876212	6.76120392805039e-158	2.11744	BHLHE22	High	Ext
GABRB3	24.8783	0.875489	2.57585518283784e-157	2.58826	BHLHE22	High	Ext
MPP4	11.0089	0.868117	1.35682672594225e-151	2.83005	BHLHE22	High	Ext
GABRG2	16.5573	0.865522	1.16155863482806e-149	2.46718	BHLHE22	High	Ext
DLGAP1-AS4	48.8635	0.858649	9.9124356641082e-145	3.40827	BHLHE22	High	Ext
VSNL1	29.6859	0.847611	2.48775286645218e-137	2.00195	BHLHE22	High	Ext
BASP1-AS1	15.8156	0.826658	9.09331349710892e-125	2.11744	BHLHE22	High	Ext
PAIP1	10.3293	0.816729	2.16086168436909e-119	2.1762	BHLHE22	High	Ext
STX1B	12.7817	0.811835	7.3326704366874e-117	2.05385	BHLHE22	High	Ext
RFTN1	62.9416	0.801648	7.97646539618728e-112	3.88839	BHLHE22	High	Ext
SLC17A6	22.1512	0.800414	3.10452407445227e-111	2.60527	BHLHE22	High	Ext
MELTF	32.294	0.796427	2.34806290191784e-109	2.12473	BHLHE22	High	Ext
SPEF2	10.8841	0.787562	2.51451750715482e-105	2.85626	BHLHE22	High	Ext
MIS18A	11.0151	0.786371	8.45973599123059e-105	3.71109	BHLHE22	High	Ext
MDH1	10.3254	0.785514	2.01421590821923e-104	2.1762	BHLHE22	High	Ext
GLS	13.7255	0.778633	1.8543839453753e-101	2.25724	BHLHE22	High	Ext
DSN1	10.8947	0.771032	2.63180682563137e-98	2.1762	BHLHE22	High	Ext
DLGAP1-AS3	33.5038	0.75866	1.98814973967507e-93	2.91544	BHLHE22	High	Ext
LSM11	14.1784	0.756689	1.11705761663009e-92	2.96128	BHLHE22	High	Ext
CFAP221	13.2453	0.747985	1.88948936049217e-89	2.18507	BHLHE22	High	Ext
DNA2	15.209	0.740864	6.6288205818307e-87	3.27812	BHLHE22	High	Ext
LINC01950	13.3895	0.738866	3.31427131515019e-86	2.346	BHLHE22	High	Ext
OLFM3	19.0542	0.723992	3.39113167249387e-81	2.7109	BHLHE22	High	Ext
CIT	18.4019	0.711972	2.21423589770462e-77	2.30937	BHLHE22	High	Ext
ERICH3	37.1154	0.676817	2.83406935963454e-67	3.75079	BHLHE22	High	Ext
LINC01793	17.5872	0.672067	5.13952008976781e-66	4.83991	BHLHE22	High	Ext
ST6GALNAC5	24.4818	0.651262	9.07077050442086e-61	2.21376	BHLHE22	High	Ext
LINC01011	11.1246	0.64242	1.15961689022585e-58	2.03635	BHLHE22	High	Ext
GALNT17	22.8373	0.63537	4.95965480139384e-57	3.83987	BHLHE22	High	Ext
ATP2B1-AS1	18.2295	0.634593	7.456941583496e-57	2.11744	BHLHE22	High	Ext
IKZF3	10.4325	0.631025	4.78400864965694e-56	2.96128	BHLHE22	High	Ext
MIR3976HG	15.5559	0.629634	9.8091215633375e-56	2.03635	BHLHE22	High	Ext
DNAAF1	10.8452	0.611134	9.84042689101588e-52	2.11744	BHLHE22	High	Ext
TTLL11	12.5245	0.60051	1.49216331257722e-49	3.72993	BHLHE22	High	Ext
DDX19A	9.48512	0.583671	2.93100425722535e-46	2.346	BHLHE22	High	Ext
ADGRF5	15.5754	0.540596	1.18138136244518e-38	4.39585	BHLHE22	High	Ext
SLC39A8	13.6161	0.539449	1.82075385071471e-38	3.27812	BHLHE22	High	Ext
KAT8	10.8891	0.536718	5.06015857242775e-38	2.1762	BHLHE22	High	Ext
SERINC3	13.2664	0.504479	4.47903672595594e-33	2.56154	BHLHE22	High	Ext
TMEM52B	26.1024	0.840164	1.16810827225205e-132	3.07377	CEBPA	High	Mic
ANKRD22	14.5722	0.818906	1.52921172774785e-120	2.39832	CEBPA	High	Mic
NLRP3	14.9672	0.817319	1.05749459931574e-119	2.34576	CEBPA	High	Mic
STX11	20.5499	0.815836	6.32890076260899e-119	2.22884	CEBPA	High	Mic
CLEC1A	28.1042	0.813231	1.41639051977948e-117	2.96793	CEBPA	High	Mic
OLR1	29.8698	0.811547	1.02823254682405e-116	3.715	CEBPA	High	Mic
CLEC7A	28.1332	0.811148	1.63973037118436e-116	3.07377	CEBPA	High	Mic
SLA	13.7017	0.809409	1.23605853925632e-115	2.03142	CEBPA	High	Mic
RNASE6	25.1994	0.80763	9.57942433803708e-115	2.77292	CEBPA	High	Mic
RCSD1	22.5893	0.804876	2.18141870426977e-113	2.18434	CEBPA	High	Mic
TNFRSF1B	27.5969	0.804674	2.73827847508597e-113	2.22344	CEBPA	High	Mic
CD163	14.5932	0.803499	1.02125245140519e-112	2.05162	CEBPA	High	Mic
OLFML3	27.4409	0.798353	2.93940293983417e-110	2.35539	CEBPA	High	Mic
CLEC9A	27.626	0.797665	6.19033631314683e-110	2.77292	CEBPA	High	Mic
PLAC8	29.0362	0.784145	7.99355784852066e-104	2.35539	CEBPA	High	Mic
CLEC5A	13.457	0.781099	1.65298711693062e-102	2.21098	CEBPA	High	Mic
DENR	8.22151	0.774341	1.15689633095274e-99	2.12107	CEBPA	High	Mic
HPSE	27.0763	0.76474	8.68160504120307e-96	2.18434	CEBPA	High	Mic
CREG1	20.065	0.749315	6.1868977048003e-90	2.18434	CEBPA	High	Mic
CLEC19A	18.7624	0.748761	9.85973903509811e-90	3.3051	CEBPA	High	Mic
MED13L	15.4884	0.738485	4.49522246220755e-86	2.61592	CEBPA	High	Mic
ACTA2	14.6594	0.733768	1.88692832143143e-84	2.12164	CEBPA	High	Mic
IL6ST	15.2739	0.733669	2.03943571362342e-84	2.68281	CEBPA	High	Mic
ATP6V1C1	9.27669	0.732606	4.67915145726032e-84	4.02662	CEBPA	High	Mic
SYT6	25.9395	0.72921	6.47720616629189e-83	2.10581	CEBPA	High	Mic
SRGAP1	12.7678	0.719479	9.68518312774424e-80	2.26738	CEBPA	High	Mic
DEGS2	11.7126	0.712441	1.58507030477734e-77	2.89173	CEBPA	High	Mic
RPS25	11.2765	0.703229	9.93258748553359e-75	2.21098	CEBPA	High	Mic
IER5L	13.5284	0.683437	4.55382093214422e-69	3.16848	CEBPA	High	Mic
IQGAP2	12.145	0.670584	1.25599229322766e-65	2.39832	CEBPA	High	Mic
UTRN	12.474	0.663518	8.27291025127274e-64	2.61592	CEBPA	High	Mic
PAG1	10.1378	0.662093	1.89795016548176e-63	2.34576	CEBPA	High	Mic
RCC2	11.2065	0.650866	1.13064413519306e-60	2.12164	CEBPA	High	Mic
PLAGL1	9.25388	0.642778	9.55870601459004e-59	2.62453	CEBPA	High	Mic
COQ2	22.5727	0.598038	4.67080594597189e-49	2.18434	CEBPA	High	Mic
VPS8	14.3235	0.596978	7.59881293786548e-49	3.02439	CEBPA	High	Mic
PAK1IP1	10.8643	0.578112	3.25512846647486e-45	2.22884	CEBPA	High	Mic
MAGEF1	9.36336	0.54589	1.57178978794193e-39	2.02284	CEBPA	High	Mic
RSBN1	8.131	0.515395	1.08394773839887e-34	2.62453	CEBPA	High	Mic
ANKRD22	17.6375	0.908217	4.39998357878253e-188	2.79795	CEBPB	High	Mic
FGL2	25.4005	0.906292	5.67634777943683e-186	3.06348	CEBPB	High	Mic
NLRP3	17.734	0.905683	2.57928218052236e-185	2.85387	CEBPB	High	Mic
APOC1	21.3137	0.905287	6.85867552475074e-185	2.54521	CEBPB	High	Mic
OLFML3	18.8741	0.904386	6.27542022451306e-184	2.09272	CEBPB	High	Mic
PTAFR	17.7785	0.901847	2.87474187926943e-181	2.06007	CEBPB	High	Mic
APOC2	21.0788	0.901709	3.98330581470691e-181	2.54521	CEBPB	High	Mic
CPVL	31.6044	0.898964	2.44762122961113e-178	2.85387	CEBPB	High	Mic
HK2	24.7301	0.898457	7.86591993542661e-178	2.09272	CEBPB	High	Mic
COLGALT1	17.2079	0.897334	1.01928699787411e-176	2.1671	CEBPB	High	Mic
ARRDC5	16.3497	0.897265	1.19138636052664e-176	3.13386	CEBPB	High	Mic
TNFAIP3	25.3112	0.894835	2.75785535708883e-174	2.3302	CEBPB	High	Mic
CLEC5A	15.097	0.888793	1.20740273444423e-168	2.60597	CEBPB	High	Mic
IL6ST	15.1484	0.867272	5.84341012479164e-151	2.54521	CEBPB	High	Mic
GAK	11.1076	0.866603	1.8425350164919e-150	2.60597	CEBPB	High	Mic
MED13L	12.8038	0.863827	2.02464095565328e-148	2.06007	CEBPB	High	Mic
SAT1	12.7612	0.861941	4.65183096905915e-147	2.06007	CEBPB	High	Mic
ATP6V0E1	21.6334	0.850725	2.33230045558774e-139	4.33496	CEBPB	High	Mic
CXorf38	9.59571	0.846085	2.36316336095034e-136	2.1056	CEBPB	High	Mic
GEMIN7	16.5308	0.843115	1.75792141422001e-134	2.42004	CEBPB	High	Mic
PGM2	16.0852	0.83933	3.76922902378946e-132	2.3302	CEBPB	High	Mic
ACTA2	17.4358	0.831064	2.90053696177301e-127	2.62	CEBPB	High	Mic
HIPK3	10.4444	0.818406	2.81746715941843e-120	2.1056	CEBPB	High	Mic
EYA3	13.2335	0.814895	1.95714828840258e-118	2.09272	CEBPB	High	Mic
IL6R	12.7645	0.79026	1.5654082705479e-106	2.51635	CEBPB	High	Mic
CLEC19A	14.3626	0.789817	2.47499901311688e-106	2.1671	CEBPB	High	Mic
NEDD9	18.5494	0.783577	1.41128966623885e-103	2.42004	CEBPB	High	Mic
UPF1	12.8924	0.761812	1.2134249207448e-94	2.2992	CEBPB	High	Mic
NAA40	7.78242	0.746544	6.28325964907124e-89	2.3958	CEBPB	High	Mic
UBAC2	15.6284	0.731623	1.00470681635582e-83	2.62082	CEBPB	High	Mic
UTRN	9.81467	0.721415	2.31898498942627e-80	2.06007	CEBPB	High	Mic
PCM1	11.6414	0.646187	1.49680480117815e-59	3.48034	CEBPB	High	Mic
CLTA	9.89754	0.615817	1.01218704653224e-52	2.42004	CEBPB	High	Mic
MCL1	8.98158	0.577326	4.55870990020434e-45	2.06007	CEBPB	High	Mic
TDRD10	11.788	0.570009	1.0024821087853e-43	2.51635	CEBPB	High	Mic
TMEM52B	29.5217	0.880505	2.00263800522422e-161	3.35105	CEBPD	High	Mic
ARPC3	20.2296	0.865916	5.96027055581209e-150	2.30693	CEBPD	High	Mic
CLEC1A	31.569	0.864376	8.05188553214361e-149	3.24302	CEBPD	High	Mic
CLEC7A	31.6148	0.862941	8.88018024508559e-148	3.35105	CEBPD	High	Mic
RNASE6	34.2729	0.860937	2.41864765527666e-146	3.04367	CEBPD	High	Mic
OLR1	31.9748	0.860388	5.93631015972482e-146	3.14074	CEBPD	High	Mic
SLA	16.2806	0.856024	6.49503154342903e-143	2.24913	CEBPD	High	Mic
MYO1F	27.0891	0.85429	9.7978237434403e-142	2.10726	CEBPD	High	Mic
CLEC9A	31.3253	0.852553	1.43333963101157e-140	3.04367	CEBPD	High	Mic
SLC18A1	11.9755	0.851531	6.83679819443879e-140	2.05737	CEBPD	High	Mic
COLGALT1	17.6798	0.850176	5.35851279060716e-139	2.67703	CEBPD	High	Mic
CYTIP	16.0122	0.845709	4.09702165357602e-136	2.05737	CEBPD	High	Mic
NRIP1	9.34241	0.844338	3.0122538177676e-135	2.05737	CEBPD	High	Mic
CLEC5A	13.1829	0.83943	3.27782502179041e-132	2.35876	CEBPD	High	Mic
VPS29	18.9047	0.834485	2.96664003722675e-129	2.41615	CEBPD	High	Mic
PRAM1	26.3667	0.834007	5.66651934435064e-129	2.17645	CEBPD	High	Mic
IL6ST	10.8846	0.809027	1.92224644875028e-115	2.17645	CEBPD	High	Mic
ATP6V1B2	10.9722	0.805828	7.44083992528509e-114	2.05737	CEBPD	High	Mic
IL15RA	14.8329	0.803663	8.50176851203863e-113	2.77874	CEBPD	High	Mic
PTEN	11.9344	0.786333	8.79518697069729e-105	2.05737	CEBPD	High	Mic
GPN3	16.5475	0.764383	1.20019588851619e-95	2.41615	CEBPD	High	Mic
BACH1	13.7877	0.762382	7.28293773524155e-95	3.00345	CEBPD	High	Mic
UPF1	10.6985	0.741875	2.92052996260806e-87	2.05737	CEBPD	High	Mic
IQGAP2	10.5536	0.740042	1.28750666772274e-86	2.54802	CEBPD	High	Mic
DEGS2	17.2459	0.728074	1.54576767848988e-82	3.12832	CEBPD	High	Mic
ARHGAP12	16.0631	0.727289	2.81030640892762e-82	2.3256	CEBPD	High	Mic
PAQR7	10.4332	0.708494	2.58214720722937e-76	2.77617	CEBPD	High	Mic
NEDD9	15.8839	0.702215	1.98775840564332e-74	2.11265	CEBPD	High	Mic
ZNF124	7.93367	0.694491	3.57364014720349e-72	2.05737	CEBPD	High	Mic
GLB1	12.6347	0.676123	4.3412500247115e-67	2.54802	CEBPD	High	Mic
AGPAT5	9.92847	0.669783	2.03197634561918e-65	2.20613	CEBPD	High	Mic
VPS8	14.0218	0.668102	5.54074506347629e-65	3.26311	CEBPD	High	Mic
MAGEF1	9.28685	0.609767	1.89716732761456e-51	2.20613	CEBPD	High	Mic
KIF5B	7.46157	0.594297	2.57903303054828e-48	2.54802	CEBPD	High	Mic
PCM1	8.30725	0.554975	4.53249418322201e-41	2.05737	CEBPD	High	Mic
SELL	6.75781	0.530071	5.8609226939396e-37	2.19749	CEBPD	High	Mic
ITPRIPL2	13.0316	0.880572	1.7602295663685e-161	4.04853	CEBPG	High	Mic
STX11	18.977	0.87996	5.72163002816967e-161	2.91801	CEBPG	High	Mic
ANKRD22	8.33847	0.879056	3.22066851250598e-160	2.3782	CEBPG	High	Mic
HK2	20.8974	0.876642	3.0440956236787e-158	2.42125	CEBPG	High	Mic
NLRP3	11.4451	0.873559	8.76238772098361e-156	3.01022	CEBPG	High	Mic
ITM2B	11.564	0.872037	1.35546498363111e-154	2.36521	CEBPG	High	Mic
HPS3	11.9327	0.866876	1.15527266628163e-150	3.01022	CEBPG	High	Mic
RCSD1	18.9619	0.865432	1.35388070275093e-149	2.31188	CEBPG	High	Mic
EPSTI1	13.9856	0.863292	4.9453963560095e-148	2.25744	CEBPG	High	Mic
DOCK8	14.0413	0.860945	2.38568448414711e-146	3.33974	CEBPG	High	Mic
NAA20	14.9499	0.854905	3.75668099080545e-142	2.31188	CEBPG	High	Mic
ATP6V0E1	12.6867	0.847211	4.49669724312754e-137	2.60843	CEBPG	High	Mic
ASAH1	9.33747	0.842516	4.14738522204509e-134	3.99431	CEBPG	High	Mic
RB1	9.76534	0.840945	3.8804766698131e-133	2.36521	CEBPG	High	Mic
TBC1D1	7.62715	0.840406	8.31374222016648e-133	2.60843	CEBPG	High	Mic
GAK	12.5506	0.830748	4.4066341942652e-127	2.25744	CEBPG	High	Mic
PGM2	12.5135	0.820033	3.82295229332662e-121	2.60843	CEBPG	High	Mic
ACTA2	10.5229	0.817087	1.39910248996898e-119	2.83252	CEBPG	High	Mic
UBA52	15.0995	0.803488	1.03368977503894e-112	2.60843	CEBPG	High	Mic
MPZL1	13.2128	0.801507	9.32030398161692e-112	2.42125	CEBPG	High	Mic
SLC40A1	17.0576	0.801332	1.13159503453292e-111	2.15247	CEBPG	High	Mic
IKBIP	8.45741	0.781427	1.19565405658362e-102	2.15247	CEBPG	High	Mic
DNAJC15	11.4412	0.762403	7.14671200622756e-95	2.25744	CEBPG	High	Mic
CREG1	16.9817	0.757556	5.24019552136631e-93	2.31188	CEBPG	High	Mic
CLEC19A	19.2197	0.75496	5.00893794104023e-92	4.97545	CEBPG	High	Mic
MDM2	8.49649	0.735114	6.55314337537112e-85	2.91801	CEBPG	High	Mic
AKIRIN2	8.69444	0.732198	6.42732897101851e-84	2.69204	CEBPG	High	Mic
CPM	7.54106	0.73043	2.53139193295513e-83	2.83252	CEBPG	High	Mic
UTRN	9.16528	0.718205	2.46490412297148e-79	3.2195	CEBPG	High	Mic
STAT5A	10.2507	0.715966	1.25752296323718e-78	2.83252	CEBPG	High	Mic
UPF1	12.0331	0.714844	2.82825936745843e-78	2.05973	CEBPG	High	Mic
CBWD1	10.2881	0.682048	1.09348294022949e-68	3.33974	CEBPG	High	Mic
IER5L	8.32116	0.675139	7.93871338297821e-67	2.91801	CEBPG	High	Mic
PCM1	11.4448	0.662742	1.3010733070623e-63	3.47334	CEBPG	High	Mic
SLC1A3	25.7555	0.656832	3.92092080906394e-62	2.62473	CEBPG	High	Mic
SF3B5	8.20402	0.652448	4.67175257479792e-61	3.11026	CEBPG	High	Mic
PLAGL1	9.87587	0.637077	2.01538216811761e-57	4.23262	CEBPG	High	Mic
TDRD10	12.9997	0.586695	7.75772762823253e-47	2.75288	CEBPG	High	Mic
UBL3	10.8493	0.574689	1.40072482367831e-44	3.01022	CEBPG	High	Mic
RPL13	12.0877	0.839605	2.56537798527538e-132	2.60132	ELF1	High	Mic
RPL32	16.1727	0.836212	2.82767853109108e-130	2.37543	ELF1	High	Mic
RHOA	16.8977	0.835419	8.34171747256514e-130	2.01577	ELF1	High	Mic
RPL21	13.9671	0.833064	2.01568629950189e-128	2.1639	ELF1	High	Mic
SP110	21.8024	0.823332	6.26023277544023e-123	2.7271	ELF1	High	Mic
TLN1	11.1424	0.820404	2.4184718710953e-121	2.02801	ELF1	High	Mic
RPL18A	29.7207	0.816024	5.04949276400047e-119	2.2311	ELF1	High	Mic
IL12RB1	55.3395	0.81481	2.1679751414291e-118	5.00102	ELF1	High	Mic
DUSP22	12.2013	0.813167	1.52786043009126e-117	2.02801	ELF1	High	Mic
AKR1A1	14.5401	0.8098	7.86000372327509e-116	2.02801	ELF1	High	Mic
ACTR3	10.0122	0.807343	1.33128628892408e-114	2.02801	ELF1	High	Mic
RPL3	25.3507	0.805016	1.86292885037906e-113	2.34608	ELF1	High	Mic
SIPA1	41.442	0.802125	4.70440241451152e-112	2.3322	ELF1	High	Mic
MMP14	20.8902	0.801553	8.85928683756742e-112	2.12389	ELF1	High	Mic
ALDH3B1	31.4723	0.799716	6.66586799792861e-111	3.31643	ELF1	High	Mic
HNRNPH1	15.4203	0.796124	3.24591390020394e-109	3.48016	ELF1	High	Mic
FGD3	44.5109	0.792382	1.71487763713142e-107	3.61287	ELF1	High	Mic
NINJ1	39.9035	0.788207	1.29969021165529e-105	2.36873	ELF1	High	Mic
ANKMY1	20.2807	0.785732	1.61677167210926e-104	4.2974	ELF1	High	Mic
PGLS	22.1644	0.781848	7.88276336005135e-103	2.2311	ELF1	High	Mic
HNRNPF	17.9759	0.77958	7.35819924341447e-102	2.7271	ELF1	High	Mic
MFNG	48.2134	0.778654	1.81670714822845e-101	3.05599	ELF1	High	Mic
USP6NL	28.5451	0.77598	2.4131544834835e-100	2.02364	ELF1	High	Mic
CASP10	32.5554	0.775005	6.13591638274805e-100	2.02364	ELF1	High	Mic
BMF	44.1919	0.77095	2.8409472639319e-98	2.00476	ELF1	High	Mic
SASH3	31.7041	0.76971	9.0386536383224e-98	2.54679	ELF1	High	Mic
TMEM119	41.8421	0.768984	1.77432584342579e-97	2.93426	ELF1	High	Mic
TCIRG1	37.6223	0.766147	2.41322741101499e-96	3.4282	ELF1	High	Mic
TRG-AS1	26.2901	0.76592	2.96923049621665e-96	6.08318	ELF1	High	Mic
COLGALT1	43.1841	0.765817	3.2636513681101e-96	3.77646	ELF1	High	Mic
SELPLG	42.3584	0.764744	8.65109748720404e-96	2.51319	ELF1	High	Mic
SUSD3	40.9214	0.764164	1.46283335264058e-95	2.82745	ELF1	High	Mic
CLEC7A	24.7017	0.76412	1.52268842875844e-95	2.02364	ELF1	High	Mic
C3	43.1637	0.76405	1.62175319622162e-95	3.61287	ELF1	High	Mic
BISPR	30.1899	0.763961	1.75769329074255e-95	2.90571	ELF1	High	Mic
BST2	30.4355	0.76358	2.47896753085872e-95	2.74805	ELF1	High	Mic
ITGB2	29.6777	0.7616	1.46603507586769e-94	2.2311	ELF1	High	Mic
APOBEC3G	49.8726	0.760836	2.89886546272773e-94	4.47653	ELF1	High	Mic
UNC93B1	39.0131	0.759921	6.52821105454976e-94	3.4282	ELF1	High	Mic
ARHGAP45	45.9868	0.759648	8.31143436666009e-94	3.61287	ELF1	High	Mic
ITGB2-AS1	30.3957	0.759634	8.41399381914913e-94	2.2311	ELF1	High	Mic
FLI1	28.7109	0.759172	1.26533906362392e-93	2.36873	ELF1	High	Mic
PFDN5	21.4176	0.758624	2.05072566506976e-93	2.71283	ELF1	High	Mic
GPR132	24.2617	0.757642	4.85936606273082e-93	2.90571	ELF1	High	Mic
ARRDC2	38.729	0.756235	1.65872182940677e-92	2.25387	ELF1	High	Mic
OXA1L	17.5617	0.755905	2.2105044430436e-92	2.10726	ELF1	High	Mic
CASP8	33.6151	0.754962	5.00061928162306e-92	2.12389	ELF1	High	Mic
VAV1	43.7743	0.754468	7.6644539580146e-92	3.61287	ELF1	High	Mic
PLVAP	28.5687	0.754061	1.08933842442361e-91	2.74805	ELF1	High	Mic
SRCAP	34.6862	0.753188	2.3042494121585e-91	2.54679	ELF1	High	Mic
DESI2	14.1144	0.752043	6.13596306617774e-91	2.87287	ELF1	High	Mic
DEF6	28.5088	0.751384	1.07538799874546e-90	2.2311	ELF1	High	Mic
IFI30	86.7422	0.750338	2.60886641095209e-90	5.49821	ELF1	High	Mic
APOBEC3F	40.7488	0.74923	6.64473893267343e-90	5.10784	ELF1	High	Mic
SP140L	27.6649	0.749183	6.9111725428941e-90	2.7271	ELF1	High	Mic
LRRC25	82.3675	0.748309	1.44043925192316e-89	4.5072	ELF1	High	Mic
CARD11	28.2875	0.74773	2.33897668067749e-89	2.02364	ELF1	High	Mic
PDGFB	38.4629	0.746581	6.0940286976205e-89	2.1769	ELF1	High	Mic
APOBEC3C	22.4169	0.744883	2.48522987378602e-88	5.71239	ELF1	High	Mic
MCOLN1	18.5569	0.737118	1.33847330540518e-85	2.01577	ELF1	High	Mic
MED14	10.958	0.735837	3.70088456526995e-85	2.30145	ELF1	High	Mic
CD300LF	39.5864	0.734807	8.34034958405862e-85	2.3322	ELF1	High	Mic
ATP6V0E1	21.3846	0.734725	8.89813890608425e-85	2.46976	ELF1	High	Mic
ANKRD10	14.502	0.730152	3.13715293929653e-83	3.75473	ELF1	High	Mic
ZNF816	19.9552	0.727956	1.69157951701972e-82	4.32793	ELF1	High	Mic
TMSB4X	17.2499	0.720215	5.63193001973656e-80	2.38537	ELF1	High	Mic
STXBP2	34.205	0.717254	4.93255314922467e-79	2.01577	ELF1	High	Mic
CHST14	18.2114	0.715299	2.03677644019563e-78	2.38537	ELF1	High	Mic
ADGRE1	36.1025	0.71472	3.09320204748747e-78	2.96178	ELF1	High	Mic
ORAI3	37.911	0.712794	1.23152412050175e-77	3.10581	ELF1	High	Mic
DNAJA1	10.0198	0.712061	2.0778665446184e-77	2.67168	ELF1	High	Mic
SBNO2	34.2305	0.70921	1.56161045546873e-76	2.70181	ELF1	High	Mic
ORAI1	14.6821	0.705154	2.63836814801091e-75	2.23968	ELF1	High	Mic
PPP6R3	13.3915	0.704343	4.61840593220906e-75	2.02801	ELF1	High	Mic
KXD1	15.1203	0.701386	3.49798772526014e-74	2.18287	ELF1	High	Mic
MBD4	28.0202	0.699606	1.17006470132424e-73	3.18153	ELF1	High	Mic
TMEM150A	32.5969	0.699319	1.42010943781568e-73	2.08415	ELF1	High	Mic
ZNF28	12.3655	0.69825	2.91526756656424e-73	2.30145	ELF1	High	Mic
CDK13	11.1834	0.698216	2.98348705847852e-73	3.2459	ELF1	High	Mic
CBL	10.6452	0.691298	2.91383902967773e-71	2.67168	ELF1	High	Mic
SH3BP1	34.4129	0.68801	2.45928586570639e-70	3.26079	ELF1	High	Mic
CD63	20.8138	0.686623	5.99466636044997e-70	2.7271	ELF1	High	Mic
TRIM4	16.8898	0.680082	3.74574130318926e-68	2.01577	ELF1	High	Mic
SLC12A9	12.1418	0.677657	1.68880027968069e-67	2.18287	ELF1	High	Mic
FAM78A	17.397	0.673662	1.95418243620266e-66	2.6033	ELF1	High	Mic
SP140	26.7007	0.668945	3.35256874490296e-65	2.7271	ELF1	High	Mic
COPS7A	31.265	0.654442	1.52166200862271e-61	3.10581	ELF1	High	Mic
SH3BP2	31.2417	0.653228	3.01650848456927e-61	2.27014	ELF1	High	Mic
SSH1	35.6597	0.652761	3.9210492485628e-61	2.82059	ELF1	High	Mic
ORMDL2	20.6059	0.652719	4.01370460284764e-61	2.93056	ELF1	High	Mic
TMEM259	19.852	0.650404	1.46193536466505e-60	2.70181	ELF1	High	Mic
PTEN	20.5564	0.648998	3.18914740419351e-60	2.18287	ELF1	High	Mic
ZNF689	14.9643	0.646527	1.24249505079426e-59	2.01577	ELF1	High	Mic
TMEM265	15.3206	0.645582	2.08365669873069e-59	2.37543	ELF1	High	Mic
RNPEPL1	15.0753	0.639452	5.70835588731653e-58	4.14979	ELF1	High	Mic
PBX2	15.6169	0.635232	5.33377242215251e-57	2.02801	ELF1	High	Mic
HSBP1	16.7967	0.63401	1.01210072144589e-56	2.01577	ELF1	High	Mic
SLC37A4	10.0193	0.632866	1.83960787161665e-56	2.18287	ELF1	High	Mic
PLXND1	22.2794	0.626419	5.08803687425004e-55	3.95199	ELF1	High	Mic
RBM23	19.1602	0.615572	1.14129449358188e-52	2.93056	ELF1	High	Mic
NUMB	15.9661	0.61432	2.10357473314994e-52	2.37543	ELF1	High	Mic
ZNF480	10.3823	0.609359	2.30636396307035e-51	3.2459	ELF1	High	Mic
ZNF611	14.0409	0.593965	2.99799257328885e-48	4.32793	ELF1	High	Mic
POU2F2	17.5564	0.59332	4.0132530065938e-48	2.01577	ELF1	High	Mic
ZNF485	14.9297	0.592036	7.16137548250233e-48	2.18287	ELF1	High	Mic
RELA	53.7836	0.589103	2.66547852068527e-47	2.21027	ELF1	High	Mic
USP39	23.2096	0.586587	8.1376055051892e-47	2.09028	ELF1	High	Mic
ELL	34.2801	0.585621	1.24586343343789e-46	3.10581	ELF1	High	Mic
LRP10	20.8698	0.577703	3.87928451104289e-45	2.38537	ELF1	High	Mic
PPM1M	21.4429	0.576439	6.65831281893411e-45	2.2311	ELF1	High	Mic
ANKRD11	11.1093	0.574758	1.36048980761308e-44	3.65872	ELF1	High	Mic
REX1BD	19.7401	0.568663	1.75590581256878e-43	2.38537	ELF1	High	Mic
MAP3K11	42.3802	0.564406	1.01541552322911e-42	2.9632	ELF1	High	Mic
POLR2G	19.4644	0.559169	8.49884583337142e-42	2.12389	ELF1	High	Mic
CANX	11.8219	0.553533	8.01369736467351e-41	2.01577	ELF1	High	Mic
DDI2	10.7951	0.550244	2.91229261957705e-40	2.60132	ELF1	High	Mic
MUS81	36.6503	0.540534	1.20948031942704e-38	2.12389	ELF1	High	Mic
BCORL1	17.0502	0.536741	5.01659724808006e-38	4.83832	ELF1	High	Mic
PCNX3	44.0288	0.533317	1.78422963167123e-37	3.37198	ELF1	High	Mic
SNHG19	32.1763	0.532533	2.38077880523051e-37	3.95199	ELF1	High	Mic
USP4	18.6391	0.522594	8.64574399726998e-36	2.01577	ELF1	High	Mic
MRPL51	36.1936	0.519646	2.45343679791291e-35	4.14105	ELF1	High	Mic
ZNF160	21.0727	0.514384	1.53852563863441e-34	5.10881	ELF1	High	Mic
PRDM11	15.3241	0.510814	5.25287581798042e-34	2.93056	ELF1	High	Mic
RNF5	13.8201	0.504189	4.93417815289253e-33	2.02801	ELF1	High	Mic
RPL13	9.5803	0.803684	8.30471279045778e-113	2.34399	ELF4	High	Mic
RPL18A	21.1848	0.796401	2.4130561539008e-109	2.65413	ELF4	High	Mic
SEL1L	11.9803	0.795986	3.76432245709594e-109	2.34399	ELF4	High	Mic
IL12RB1	28.7096	0.781198	1.49957195805638e-102	3.91902	ELF4	High	Mic
ALDH3B1	23.4976	0.780734	2.36876849642056e-102	3.21542	ELF4	High	Mic
RPL21	8.46207	0.772688	5.54713185200179e-99	2.67769	ELF4	High	Mic
PFDN5	16.8719	0.767122	9.87684674507463e-97	2.01996	ELF4	High	Mic
SF3B1	17.2005	0.765118	6.16794450242507e-96	2.09445	ELF4	High	Mic
PET100	8.08182	0.761492	1.61445936185634e-94	2.04296	ELF4	High	Mic
ARRDC2	25.4312	0.757775	4.32343928539107e-93	2.61771	ELF4	High	Mic
OXA1L	12.9153	0.754745	6.03501906903987e-92	3.23921	ELF4	High	Mic
HAUS4	11.5907	0.747339	3.24304422466406e-89	2.00762	ELF4	High	Mic
ACIN1	6.96191	0.747172	3.72360651019446e-89	2.1829	ELF4	High	Mic
ZNF592	11.4595	0.745401	1.62088640803071e-88	2.04296	ELF4	High	Mic
MMP14	20.2445	0.743767	6.22527931245116e-88	3.43738	ELF4	High	Mic
GRAMD1A	12.2661	0.732433	5.35596074405642e-84	2.39738	ELF4	High	Mic
FMO4	7.34559	0.732057	7.17379693912718e-84	2.21404	ELF4	High	Mic
STK10	20.9765	0.724866	1.75993870950315e-81	3.10462	ELF4	High	Mic
PFDN6	8.9002	0.719367	1.05195336209534e-79	2.78999	ELF4	High	Mic
TRIM4	11.2511	0.716494	8.57605227248505e-79	2.95005	ELF4	High	Mic
ZNF816	18.6374	0.716018	1.21034657666815e-78	5.35562	ELF4	High	Mic
SMAD4	6.87255	0.71584	1.37759380677008e-78	2.04296	ELF4	High	Mic
SH3BGRL3	7.28748	0.712098	2.02362601013368e-77	2.76104	ELF4	High	Mic
CDK13	9.23753	0.708757	2.14676938290057e-76	4.01662	ELF4	High	Mic
MFNG	29.2256	0.705654	1.86697418273485e-75	2.52357	ELF4	High	Mic
APOBEC3F	19.3319	0.702518	1.61621120474174e-74	2.00762	ELF4	High	Mic
WDR1	18.2486	0.697886	3.72283367655884e-73	3.23921	ELF4	High	Mic
TRG-AS1	26.3665	0.696439	9.79672564834811e-73	7.85219	ELF4	High	Mic
SASH3	20.8244	0.69384	5.4924329535796e-72	2.64629	ELF4	High	Mic
SLC2A9	13.7178	0.690042	6.60068297938186e-71	2.28835	ELF4	High	Mic
TCIRG1	34.6634	0.689429	9.82971041700358e-71	3.97281	ELF4	High	Mic
CD300A	31.4083	0.689313	1.05912630666378e-70	2.52357	ELF4	High	Mic
ATP6V0E1	15.3753	0.68711	4.38645738369571e-70	2.86396	ELF4	High	Mic
UNC93B1	35.0746	0.683253	5.11531592907876e-69	3.97281	ELF4	High	Mic
RNASET2	17.1922	0.680136	3.62068244684931e-68	2.46882	ELF4	High	Mic
IFI30	27.4161	0.67165	6.61483766097126e-66	2.25898	ELF4	High	Mic
TMEM173	29.7615	0.67089	1.04498963675783e-65	2.64629	ELF4	High	Mic
GATAD2A	7.37704	0.669516	2.38316936848146e-65	3.04696	ELF4	High	Mic
LRRC25	32.3385	0.66645	1.47649852365132e-64	2.52357	ELF4	High	Mic
ZNF480	9.3994	0.666247	1.66429610305791e-64	4.01662	ELF4	High	Mic
LRRC8C	13.4112	0.665665	2.34579291269603e-64	2.64629	ELF4	High	Mic
RAPGEF1	23.9453	0.665438	2.68139142293108e-64	2.08574	ELF4	High	Mic
TMEM265	11.1306	0.656385	5.05905863605065e-62	2.1829	ELF4	High	Mic
RBM23	11.9795	0.645311	2.41606360081014e-59	2.95005	ELF4	High	Mic
ZNF28	11.3302	0.639436	5.75478217438424e-58	3.04696	ELF4	High	Mic
LRP10	13.589	0.60671	8.147100409333e-51	2.51613	ELF4	High	Mic
SH3BP1	18.8916	0.600073	1.82696770395274e-49	2.00762	ELF4	High	Mic
WDR4	12.3329	0.597449	6.12202556164747e-49	2.53308	ELF4	High	Mic
NPC1	12.3199	0.595564	1.45000648496789e-48	2.1829	ELF4	High	Mic
MIS18BP1	7.77884	0.589523	2.21025678830142e-47	2.21404	ELF4	High	Mic
ZNF160	19.5757	0.581527	7.45769130889585e-46	6.62141	ELF4	High	Mic
UBE2D2	16.7748	0.568752	1.6919411533725e-43	2.78999	ELF4	High	Mic
SSH1	23.7784	0.567993	2.31770070817006e-43	2.83672	ELF4	High	Mic
ZNF738	8.89726	0.566748	3.87833496073501e-43	2.53308	ELF4	High	Mic
ZNF611	8.94898	0.560887	4.25229749211319e-42	3.42975	ELF4	High	Mic
ZNF600	8.33672	0.535649	7.53051652947053e-38	3.04696	ELF4	High	Mic
RDH5	10.5999	0.517108	5.9720488089836e-35	2.53308	ELF4	High	Mic
RNASEH2C	18.2355	0.501723	1.1224276795316e-32	3.01648	ELF4	High	Mic
YES1	7.8954	0.832895	2.53049522894235e-128	2.11251	EMX2	High	Ast_Inh
ARHGAP5	8.33188	0.789398	3.81416236358696e-106	2.01998	EMX2	High	Ast_Inh
NTRK2	14.914	0.765533	4.22411703166443e-96	2.20396	EMX2	High	Ast_Inh
PITPNC1	21.1778	0.731298	1.29279048375849e-83	2.5454	EMX2	High	Ast_Inh
EFEMP1	18.1997	0.671931	5.58065731957589e-66	2.21728	EMX2	High	Ast_Inh
ABHD1	12.4068	0.617789	3.84127116994058e-53	3.73397	EMX2	High	Ast_Inh
LINC01995	10.7984	0.610941	1.07956648814197e-51	2.21728	EMX2	High	Ast_Inh
FGL1	11.0502	0.578845	2.3763844696746e-45	2.61974	EMX2	High	Ast_Inh
ASB4	11.0318	0.555597	3.54083433370293e-41	2.15559	EMX2	High	Ast_Inh
RAB11FIP2	13.0311	0.539556	1.74871028310435e-38	2.11251	EMX2	High	Ast_Inh
EMILIN1	12.5607	0.537052	4.4678092290382e-38	3.73397	EMX2	High	Ast_Inh
LEKR1	13.617	0.522477	9.0159993022683e-36	2.55001	EMX2	High	Ast_Inh
DLX1	20.3098	0.503592	6.02361972515069e-33	2.28417	EMX2	High	Ast_Inh
RPL29	13.5931	0.74398	5.22299078346614e-88	2.57008	ERF	High	Mic
GOLPH3	6.89508	0.718497	1.99185978336573e-79	2.71681	ERF	High	Mic
TRA2B	12.4834	0.717369	4.53751878799105e-79	2.5518	ERF	High	Mic
CGGBP1	7.80676	0.715526	1.72837178454278e-78	2.18112	ERF	High	Mic
RNASEK	10.3698	0.705373	2.26836824367395e-75	2.18112	ERF	High	Mic
DNAJA1	7.00828	0.704935	3.07099585458329e-75	2.18112	ERF	High	Mic
PFDN6	10.7302	0.694893	2.73928674631372e-72	3.2797	ERF	High	Mic
ELF4	10.1098	0.665886	2.05902527397736e-64	2.16678	ERF	High	Mic
TRIM4	9.86514	0.660901	3.78639654089119e-63	2.2807	ERF	High	Mic
ADA2	14.2695	0.660465	4.87431650570465e-63	2.06384	ERF	High	Mic
ZNF592	13.0125	0.656243	5.4850431476258e-62	2.40796	ERF	High	Mic
RB1	16.7609	0.649775	2.07360888334774e-60	2.15632	ERF	High	Mic
CARD8	7.83075	0.645219	2.53919841590744e-59	2.16678	ERF	High	Mic
KDM2A	7.47374	0.643538	6.33501289437333e-59	2.2807	ERF	High	Mic
RPS20	8.87062	0.639704	4.98975700464672e-58	2.06384	ERF	High	Mic
NCKAP5-AS2	8.65136	0.638377	1.01162214091948e-57	3.14175	ERF	High	Mic
ITM2B	18.8216	0.634966	6.1324447163493e-57	2.15632	ERF	High	Mic
PSTPIP2	9.12567	0.63051	6.24397626691623e-56	2.2807	ERF	High	Mic
ETV5	11.6843	0.630277	7.04153367008903e-56	2.9975	ERF	High	Mic
FGD3	16.2331	0.627489	2.94833945749527e-55	2.22763	ERF	High	Mic
SRCAP	18.0889	0.618444	2.7795538012405e-53	2.06384	ERF	High	Mic
IL17RA	15.1112	0.614562	1.86916337817486e-52	2.2807	ERF	High	Mic
MFNG	25.7628	0.606036	1.12094045001771e-50	2.37719	ERF	High	Mic
ARHGAP30	30.8865	0.60312	4.42169838274743e-50	4.15933	ERF	High	Mic
SFMBT2	10.2714	0.601398	9.87485895212412e-50	2.0888	ERF	High	Mic
PIGH	9.34793	0.596361	1.00777848010385e-48	2.06384	ERF	High	Mic
FCER1G	24.476	0.588568	3.38208228425203e-47	3.13182	ERF	High	Mic
VSIG4	18.4646	0.582709	4.4605804547698e-46	2.2807	ERF	High	Mic
CARD11	14.4837	0.572537	3.47616186391488e-44	2.15632	ERF	High	Mic
JTB	7.72012	0.571098	6.35951000849399e-44	2.71681	ERF	High	Mic
DEF6	14.5852	0.570875	6.9802723626815e-44	2.30309	ERF	High	Mic
MRPL51	18.5993	0.567149	3.2870449143802e-43	3.45688	ERF	High	Mic
USF1	11.2116	0.5566	2.37590729286195e-41	3.2797	ERF	High	Mic
CD27-AS1	19.5656	0.556581	2.39425476625397e-41	2.05317	ERF	High	Mic
NCAPD2	18.4189	0.5268	1.91805385006351e-36	3.34423	ERF	High	Mic
PIK3CD	14.8984	0.524297	4.71074615009763e-36	2.06384	ERF	High	Mic
FBXL5	10.7432	0.521025	1.50812581625272e-35	2.40796	ERF	High	Mic
ABHD14B	18.352	0.51795	4.44893595295716e-35	2.43883	ERF	High	Mic
HMBS	12.7144	0.517354	5.48034042967365e-35	2.9975	ERF	High	Mic
C8orf82	11.7116	0.516183	8.24392154511548e-35	3.6284	ERF	High	Mic
ANGEL2	7.39409	0.509804	7.41385558831145e-34	2.47225	ERF	High	Mic
C9orf78	9.33126	0.505101	3.63581539289076e-33	2.90983	ERF	High	Mic
COPS6	12.5228	0.503839	5.54694981248963e-33	2.38316	ERF	High	Mic
CASP10	50.754	0.94175	6.48196429740423e-235	2.86163	ETS2	High	Mic
FCER1G	48.6987	0.941439	2.32729292694432e-234	2.79039	ETS2	High	Mic
CASP8	51.6071	0.941373	3.04364501920115e-234	3.04427	ETS2	High	Mic
CSF3R	31.3346	0.940888	2.16888887481069e-233	2.7644	ETS2	High	Mic
SASH3	37.3211	0.940162	3.97862491843073e-232	4.66574	ETS2	High	Mic
IL4R	51.4843	0.939407	7.92220636909916e-231	2.45233	ETS2	High	Mic
CD4	82.9151	0.939019	3.63705697816212e-230	3.94912	ETS2	High	Mic
PLK3	30.8047	0.938844	7.20953026020678e-230	2.48349	ETS2	High	Mic
LPAR5	62.3565	0.938612	1.77961854043785e-229	2.81753	ETS2	High	Mic
SERPINA1	23.7226	0.93854	2.34752027855016e-229	2.83049	ETS2	High	Mic
RPL39	23.63	0.938425	3.68094027515843e-229	3.1006	ETS2	High	Mic
TLR6	42.0577	0.9372	4.02585669069252e-227	2.40598	ETS2	High	Mic
PTPN6	52.5293	0.9371	5.87484553409565e-227	2.40598	ETS2	High	Mic
NAA20	30.3011	0.93479	3.16235877366181e-223	2.11413	ETS2	High	Mic
ARRDC5	28.7704	0.934722	4.04058521174652e-223	3.06328	ETS2	High	Mic
PDGFB	53.8412	0.934368	1.46572219828293e-222	2.12575	ETS2	High	Mic
ARHGAP25	37.4713	0.933988	5.81326635312133e-222	2.25439	ETS2	High	Mic
DEF6	52.6767	0.933734	1.45193640148904e-221	2.57029	ETS2	High	Mic
LINC02381	57.6199	0.932739	5.06634760837195e-220	3.06328	ETS2	High	Mic
IL21R	52.3025	0.930042	5.85246013966714e-216	2.45233	ETS2	High	Mic
TMEM173	26.0804	0.928273	2.20235898784331e-213	2.0359	ETS2	High	Mic
APOBEC3G	53.9611	0.926166	2.13623814826366e-210	2.40598	ETS2	High	Mic
CAP1	21.3588	0.925424	2.29535426288409e-209	2.15397	ETS2	High	Mic
HSPBAP1	18.9362	0.922861	6.91076458486689e-206	2.17201	ETS2	High	Mic
LTBR	77.7833	0.9205	8.74471638909558e-203	3.45694	ETS2	High	Mic
LINC00578	32.7538	0.917133	1.57607130099362e-198	2.85665	ETS2	High	Mic
IKBKE	31.926	0.916587	7.42635003361785e-198	3.09384	ETS2	High	Mic
ZNF700	18.9742	0.912249	1.1460640987963e-192	2.4645	ETS2	High	Mic
PARP14	26.6541	0.910553	1.03268775462331e-190	3.1006	ETS2	High	Mic
OAS2	20.8055	0.906423	4.0929360022069e-186	2.17201	ETS2	High	Mic
CEBPB	42.2089	0.906059	1.01618045445142e-185	2.31814	ETS2	High	Mic
RPS28	31.8379	0.900697	4.34154789828929e-180	2.11958	ETS2	High	Mic
AKR1A1	18.7786	0.900324	1.04206078984957e-179	3.31428	ETS2	High	Mic
RPL3	30.4279	0.894199	1.12249071135396e-173	2.11958	ETS2	High	Mic
CFLAR	32.3044	0.891248	6.76549446388062e-171	2.25439	ETS2	High	Mic
DENND3	49.9941	0.890697	2.18968844116931e-170	3.44244	ETS2	High	Mic
CORO1B	57.4582	0.883938	2.39631052653575e-164	2.94426	ETS2	High	Mic
RPS8	19.6713	0.882416	4.84768272091782e-163	2.17201	ETS2	High	Mic
UBA52	31.3272	0.876627	3.12971073311015e-158	2.27829	ETS2	High	Mic
MOB3A	38.5854	0.864938	3.12597065259099e-149	2.25317	ETS2	High	Mic
SSH1	34.6428	0.862503	1.83737302132075e-147	2.12575	ETS2	High	Mic
ATRN	26.8188	0.861389	1.15396267596774e-146	2.4645	ETS2	High	Mic
DTX3L	26.0836	0.856831	1.81131962030412e-143	3.1006	ETS2	High	Mic
ZNF433-AS1	14.8794	0.855288	2.06208005033349e-142	2.16494	ETS2	High	Mic
APOBEC3F	48.8123	0.854684	5.30421328104702e-142	2.94418	ETS2	High	Mic
LDLRAD4	14.6738	0.852255	2.26394201980048e-140	2.17201	ETS2	High	Mic
TNFRSF1A	56.502	0.847859	1.7206339429713e-137	2.66581	ETS2	High	Mic
MBD4	36.1445	0.845721	4.02467855801628e-136	2.53559	ETS2	High	Mic
KDM2A	29.8422	0.843024	2.00367620563275e-134	3.38041	ETS2	High	Mic
POLD4	48.6165	0.838706	9.01231733360859e-132	4.81446	ETS2	High	Mic
LINC02015	20.8291	0.836521	1.85077580818954e-130	2.4645	ETS2	High	Mic
FLVCR1-DT	23.0816	0.808265	4.6267901911414e-115	4.21589	ETS2	High	Mic
PPM1M	37.2846	0.793668	4.42715519552147e-108	4.81446	ETS2	High	Mic
BTBD19	21.8017	0.77293	4.41694004514594e-99	2.24372	ETS2	High	Mic
IFFO1	64.2577	0.772072	9.90883900240226e-99	4.02214	ETS2	High	Mic
SH3BP2	34.7868	0.765769	3.4077933348248e-96	2.25317	ETS2	High	Mic
C20orf27	22.0127	0.763918	1.82695667262082e-95	2.4645	ETS2	High	Mic
APOBEC3C	21.5882	0.75395	1.19840655178503e-91	2.0359	ETS2	High	Mic
MARCH2	39.1276	0.752714	3.45946543088115e-91	2.12575	ETS2	High	Mic
PARP9	23.4215	0.74253	1.7125714376675e-87	3.51575	ETS2	High	Mic
KLF16	30.8613	0.73242	5.40752007929172e-84	2.55206	ETS2	High	Mic
ELL	38.7389	0.728126	1.48546707098215e-82	2.74901	ETS2	High	Mic
PLXND1	26.1875	0.727821	1.87510872247762e-82	2.74901	ETS2	High	Mic
NOP2	60.7235	0.724965	1.63279596031888e-81	3.1963	ETS2	High	Mic
MCFD2	20.8419	0.694068	4.72485279858137e-72	2.55206	ETS2	High	Mic
EMG1	17.7577	0.66962	2.23959467238487e-65	2.24372	ETS2	High	Mic
TNIP2	28.8308	0.654136	1.80906679398188e-61	2.69256	ETS2	High	Mic
BCORL1	16.8611	0.631004	4.83655870088222e-56	3.06328	ETS2	High	Mic
AGPAT2	19.763	0.619095	2.0142013631969e-53	2.15397	ETS2	High	Mic
C1RL	27.7548	0.600629	1.41176076169871e-49	5.11221	ETS2	High	Mic
ZNF740	17.44	0.594206	2.68726848986141e-48	2.45233	ETS2	High	Mic
C11orf24	21.0185	0.579985	1.45373490065758e-45	2.0359	ETS2	High	Mic
GLMP	15.5089	0.558986	9.14631538658159e-42	2.48349	ETS2	High	Mic
VAMP1	15.6622	0.557645	1.56551547960048e-41	3.06328	ETS2	High	Mic
TICAM1	25.0783	0.54125	9.22692429497493e-39	6.32345	ETS2	High	Mic
ZNF763	31.9274	0.524247	4.795419734623e-36	2.48349	ETS2	High	Mic
RPL21	9.14381	0.895277	1.03344235500442e-174	2.16089	ETV6	High	Mic
ANKRD44	20.8311	0.894159	1.22482522816077e-173	2.23885	ETV6	High	Mic
RPL27A	11.9008	0.881692	2.00347043079163e-162	2.02378	ETV6	High	Mic
C14orf119	14.1876	0.877425	7.03997626908408e-159	3.15613	ETV6	High	Mic
FAU	10.3129	0.875057	5.70331000183668e-157	2.23323	ETV6	High	Mic
MMP14	18.5986	0.872636	4.63035173576908e-155	2.11664	ETV6	High	Mic
H2AFJ	14.3716	0.87119	6.13698600433676e-154	2.37883	ETV6	High	Mic
ANKRD44-IT1	22.382	0.869534	1.14541443473325e-152	2.81864	ETV6	High	Mic
RPL3	26.4268	0.86597	5.43229259485741e-150	2.33861	ETV6	High	Mic
ARHGAP30	20.7913	0.864182	1.11522535316832e-148	2.37883	ETV6	High	Mic
LST1	49.7799	0.862131	3.40102268625083e-147	4.351	ETV6	High	Mic
RGS10	31.4638	0.860309	6.75319350696742e-146	2.46466	ETV6	High	Mic
NOD2	17.135	0.85955	2.31420431284298e-145	2.01048	ETV6	High	Mic
FCER1G	21.4782	0.85941	2.900786836695e-145	2.54013	ETV6	High	Mic
AIF1	50.455	0.858731	8.69684871060601e-145	4.49319	ETV6	High	Mic
CAP1	32.8735	0.858179	2.1105562003354e-144	2.8978	ETV6	High	Mic
IL13RA1	20.4247	0.857491	6.33697423884274e-144	2.01048	ETV6	High	Mic
VSIG4	21.5786	0.856902	1.6165364832204e-143	2.01048	ETV6	High	Mic
SRGN	47.7686	0.856056	6.17188505705312e-143	2.6931	ETV6	High	Mic
CIITA	27.5718	0.855418	1.68222048886784e-142	2.57536	ETV6	High	Mic
APOC2	29.5255	0.854996	3.25578759820573e-142	2.26188	ETV6	High	Mic
GIMAP7	31.8723	0.854593	6.11352130502213e-142	2.22374	ETV6	High	Mic
APOC1	29.8743	0.85453	6.74474784790627e-142	2.26188	ETV6	High	Mic
PARVG	14.0331	0.853452	3.59061136686491e-141	2.36993	ETV6	High	Mic
CLIC1	51.5514	0.851947	3.62497923591016e-140	4.79857	ETV6	High	Mic
PELI1	27.9182	0.851719	5.13775234591447e-140	2.54013	ETV6	High	Mic
RASGRP4	12.2793	0.851148	1.22476704685011e-139	2.01048	ETV6	High	Mic
UNC13D	11.6461	0.85104	1.44459106403104e-139	2.23323	ETV6	High	Mic
VAV1	37.2486	0.850784	2.13108938632561e-139	2.11664	ETV6	High	Mic
PLK3	22.3644	0.850679	2.4989455503173e-139	2.01048	ETV6	High	Mic
APOBEC3G	36.1792	0.849625	1.22953271983409e-138	2.81864	ETV6	High	Mic
WDR26	10.826	0.849333	1.90572553404304e-138	2.59571	ETV6	High	Mic
LINC01091	24.2285	0.846754	8.84169421109823e-137	3.25163	ETV6	High	Mic
SLC37A2	32.408	0.846327	1.65538564108478e-136	3.15613	ETV6	High	Mic
TNFRSF13C	14.379	0.846196	2.00785566020722e-136	2.17748	ETV6	High	Mic
SERPINB1	22.4194	0.845389	6.54658638373025e-136	2.01649	ETV6	High	Mic
PDGFB	37.9367	0.841279	2.41571573399776e-133	2.81088	ETV6	High	Mic
LINC00996	26.0704	0.839762	2.05694774770151e-132	2.10093	ETV6	High	Mic
PIAS1	14.0373	0.839202	4.50629416062596e-132	2.01048	ETV6	High	Mic
PPT1	31.4792	0.838327	1.52760175701084e-131	2.23323	ETV6	High	Mic
SNX20	16.9014	0.837765	3.33455466007178e-131	2.01048	ETV6	High	Mic
GRB2	19.8758	0.836114	3.23000379583874e-130	2.22374	ETV6	High	Mic
LINC01176	16.3427	0.833032	2.10450672870807e-128	2.23323	ETV6	High	Mic
RYR1	10.8587	0.832421	4.76698223935933e-128	2.17748	ETV6	High	Mic
NAGA	12.5316	0.831162	2.5467095386973e-127	2.17748	ETV6	High	Mic
TMEM255B	8.84593	0.829651	1.8647861196063e-126	2.36993	ETV6	High	Mic
RPL38	11.1633	0.822643	1.48765003815043e-122	3.15613	ETV6	High	Mic
CALHM6	22.1604	0.820799	1.48382186353042e-121	2.37883	ETV6	High	Mic
NUBP1	16.3347	0.817328	1.0453967157715e-119	2.33861	ETV6	High	Mic
APOBEC3F	29.1257	0.809272	1.44780479328421e-115	2.46219	ETV6	High	Mic
FRAT1	10.8451	0.806999	1.96961200592484e-114	2.29713	ETV6	High	Mic
DDX21	40.1017	0.797347	8.71534122327224e-110	3.09676	ETV6	High	Mic
DDX39B	23.8613	0.792543	1.44831711476472e-107	3.79961	ETV6	High	Mic
ORAI3	29.0758	0.787091	4.06879812629493e-105	3.94135	ETV6	High	Mic
MICB	43.0311	0.782187	5.63893754372889e-103	3.52148	ETV6	High	Mic
FBXW11	12.2723	0.778165	2.92498584217632e-101	2.01048	ETV6	High	Mic
OAZ1	20.361	0.777912	3.73991982703559e-101	2.10093	ETV6	High	Mic
MOB3A	30.7391	0.773189	3.45434543300226e-99	2.26188	ETV6	High	Mic
PTEN	17.9462	0.762352	7.47677874435957e-95	2.17748	ETV6	High	Mic
ACIN1	15.76	0.761536	1.55196436636304e-94	3.42629	ETV6	High	Mic
OXA1L	15.0209	0.757256	6.8109888392897e-93	2.10093	ETV6	High	Mic
LSM7	23.4201	0.751284	1.17112419838651e-90	2.74025	ETV6	High	Mic
STAT6	24.9738	0.750855	1.68520774793122e-90	2.46466	ETV6	High	Mic
EIF5	10.8345	0.748728	1.01373082754144e-89	2.54013	ETV6	High	Mic
FRAT2	12.7671	0.743899	5.58339390169022e-88	2.02378	ETV6	High	Mic
DDAH2	33.385	0.738033	6.45387014363774e-86	4.42878	ETV6	High	Mic
RAB12	15.2685	0.724136	3.04378216460835e-81	2.17748	ETV6	High	Mic
STYX	12.5852	0.717377	4.51054568265911e-79	3.6528	ETV6	High	Mic
HSPA1A	17.4117	0.715095	2.36098294955769e-78	3.44961	ETV6	High	Mic
SH3BP2	25.8031	0.713122	9.7376471969594e-78	3.65672	ETV6	High	Mic
ANKHD1	18.3581	0.71213	1.97855248335966e-77	2.26188	ETV6	High	Mic
MSH5	26.9453	0.701819	2.60515820343445e-74	4.42878	ETV6	High	Mic
ARF6	15.0722	0.677606	1.74174285935727e-67	3.26057	ETV6	High	Mic
IFFO1	26.0864	0.665814	2.14906508505671e-64	2.17197	ETV6	High	Mic
HSPA1B	13.2609	0.656403	5.00875788779149e-62	2.33861	ETV6	High	Mic
FAM219B	12.0719	0.648945	3.28309095143586e-60	2.23323	ETV6	High	Mic
TMEM265	9.89032	0.645333	2.38683430683769e-59	2.36993	ETV6	High	Mic
N4BP1	9.78185	0.644685	3.3984762368004e-59	2.36993	ETV6	High	Mic
CSNK2B	10.6757	0.63992	4.44453273035231e-58	3.26057	ETV6	High	Mic
CSNK1D	12.2962	0.639291	6.21770996173032e-58	2.37883	ETV6	High	Mic
PFDN6	12.5054	0.634037	9.97719214883149e-57	2.72034	ETV6	High	Mic
BAG6	11.322	0.615518	1.17228458914659e-52	2.10093	ETV6	High	Mic
PRDM11	22.2086	0.605125	1.72399533000647e-50	2.92369	ETV6	High	Mic
TNIP2	18.1913	0.602471	5.98752670986467e-50	2.57536	ETV6	High	Mic
SPRY1	13.1721	0.602394	6.20674700564199e-50	3.41893	ETV6	High	Mic
LSM2	10.9209	0.590308	1.55576122013515e-47	2.23323	ETV6	High	Mic
NFIC	12.2992	0.590114	1.69743958499231e-47	2.23323	ETV6	High	Mic
NEU1	14.7199	0.587469	5.50875731258503e-47	2.46219	ETV6	High	Mic
SMYD4	18.4179	0.586202	9.64702086166434e-47	2.22374	ETV6	High	Mic
NOP2	26.6834	0.575049	1.20243208480372e-44	2.03573	ETV6	High	Mic
MRPS7	9.59904	0.567558	2.77537656894605e-43	2.01048	ETV6	High	Mic
BCKDK	10.2396	0.537159	4.29335487406286e-38	2.36993	ETV6	High	Mic
FBXL4	8.52498	0.531067	4.07541676573925e-37	2.01048	ETV6	High	Mic
HCP5	22.8579	0.527879	1.29907161624534e-36	2.46466	ETV6	High	Mic
SUFU	8.51887	0.509182	9.1602145943624e-34	2.01048	ETV6	High	Mic
LZTFL1	22.0814	0.894982	1.99025457238208e-174	2.17702	FOSB	High	Ext
C1QL3	27.3754	0.892633	3.42684493552741e-172	3.13049	FOSB	High	Ext
YWHAZ	34.0337	0.889192	5.23140690714112e-169	3.07993	FOSB	High	Ext
EPB41L4B	28.5873	0.885843	5.20404428294483e-166	2.30286	FOSB	High	Ext
MINDY3	17.917	0.880976	8.05216625740158e-162	2.51135	FOSB	High	Ext
DUSP5	26.0627	0.87116	6.47602348161901e-154	3.50313	FOSB	High	Ext
ADAMTS3	22.7986	0.842815	2.70657802569105e-134	2.27807	FOSB	High	Ext
FBXO33	16.1721	0.824725	1.0747322844889e-123	2.29287	FOSB	High	Ext
ZDHHC23	19.1019	0.812331	4.09299759036182e-117	3.05746	FOSB	High	Ext
ARL14EP	17.4228	0.812115	5.2813941591637e-117	2.27484	FOSB	High	Ext
SV2B	56.9658	0.809975	6.41624615519643e-116	3.44315	FOSB	High	Ext
NDFIP2	19.9438	0.797909	4.75221471647037e-110	2.48189	FOSB	High	Ext
LDB2	50.8957	0.784905	3.72489053601724e-104	2.83251	FOSB	High	Ext
DACH2	9.60853	0.783338	1.79234248861909e-103	2.3097	FOSB	High	Ext
CCDC158	18.7765	0.777748	4.38205143812389e-101	3.49344	FOSB	High	Ext
GALNTL5	30.7255	0.765514	4.29777003968455e-96	2.66609	FOSB	High	Ext
KCNA4	19.7206	0.762406	7.12583586626507e-95	2.59392	FOSB	High	Ext
DNMT3A	13.5872	0.760145	5.35115514152482e-94	3.50313	FOSB	High	Ext
TNNC2	15.3656	0.741027	5.8098469418872e-87	2.06983	FOSB	High	Ext
ATP2B1-AS1	23.0627	0.740996	5.95386894738658e-87	3.70954	FOSB	High	Ext
KALRN	24.6244	0.739779	1.59131691039708e-86	3.07993	FOSB	High	Ext
PEX26	24.2773	0.734061	1.49927303370644e-84	2.48189	FOSB	High	Ext
DSP	9.31264	0.728003	1.63146273892412e-82	2.88596	FOSB	High	Ext
GLS	14.0498	0.727457	2.47511076679442e-82	2.29287	FOSB	High	Ext
GTF3C1	15.1933	0.716889	6.43643502709161e-79	2.55573	FOSB	High	Ext
VPS37B	17.0082	0.714778	2.96609941698351e-78	2.55573	FOSB	High	Ext
APBA2	17.217	0.698876	1.91364196630435e-73	2.09716	FOSB	High	Ext
MAP4K3-DT	24.0103	0.698311	2.79822736806703e-73	2.09716	FOSB	High	Ext
AK5	15.397	0.696505	9.37731926601842e-73	3.13037	FOSB	High	Ext
KCNH1	36.9408	0.687193	4.15887622863355e-70	3.46999	FOSB	High	Ext
SNX31	20.427	0.686692	5.73292247538904e-70	3.13037	FOSB	High	Ext
C9orf16	31.6232	0.682421	8.64250431705406e-69	2.25522	FOSB	High	Ext
PTPRN	28.9975	0.678703	8.83091456912315e-68	2.6973	FOSB	High	Ext
LINC01205	11.4789	0.66731	8.86787934784159e-65	2.51135	FOSB	High	Ext
CNGB1	15.2154	0.653926	2.03686962936877e-61	2.55573	FOSB	High	Ext
SPEF1	16.9219	0.653757	2.23997604458076e-61	2.8423	FOSB	High	Ext
TPMT	11.765	0.653185	3.09005320457744e-61	2.27484	FOSB	High	Ext
SLC6A20	13.0469	0.647574	6.99432659229159e-60	3.05746	FOSB	High	Ext
GGCT	10.1032	0.647543	7.1129900785677e-60	2.64365	FOSB	High	Ext
ACOT8	12.8881	0.639608	5.25093300359722e-58	2.41859	FOSB	High	Ext
PAK1	14.4186	0.628813	1.4961909206348e-55	2.17702	FOSB	High	Ext
SMAD3	15.5936	0.622261	4.15644989978846e-54	2.06983	FOSB	High	Ext
FAM207A	14.7983	0.62169	5.53240279886954e-54	2.41859	FOSB	High	Ext
MICAL3	11.2076	0.620556	9.7439379362129e-54	2.17702	FOSB	High	Ext
KATNAL1	15.0587	0.616842	6.12060936383471e-53	2.8423	FOSB	High	Ext
LINC-PINT	15.0124	0.61274	4.53048973742955e-52	3.40046	FOSB	High	Ext
RGS6	16.7026	0.592119	6.89921549760944e-48	2.41859	FOSB	High	Ext
TMEM196	9.31346	0.569903	1.04777955291058e-43	2.01367	FOSB	High	Ext
LINC00607	13.0168	0.555062	4.37915249400986e-41	2.01367	FOSB	High	Ext
RASA2	10.0941	0.539289	1.93324442322639e-38	2.4465	FOSB	High	Ext
PPP1CB	10.5382	0.529004	8.64230782351053e-37	2.3097	FOSB	High	Ext
DNAH2	9.09473	0.509975	6.9929935824992e-34	2.4465	FOSB	High	Ext
RFX3	12.1825	0.507356	1.70132877593377e-33	3.9456	FOSB	High	Ext
DTD2	13.8422	0.865834	6.84582178261868e-150	2.67679	FOXJ3	High	Oli
ERBIN	22.354	0.863429	3.93502880705246e-148	3.0372	FOXJ3	High	Oli
SLIRP	11.4052	0.858067	2.52662993645207e-144	2.18175	FOXJ3	High	Oli
HBP1	7.22414	0.843324	1.30342441553578e-134	2.02371	FOXJ3	High	Oli
PHLPP1	14.9432	0.836243	2.7075680299857e-130	2.5175	FOXJ3	High	Oli
DAAM2	23.5077	0.828552	7.83943307238484e-126	2.11308	FOXJ3	High	Oli
SCD5	18.5382	0.822625	1.52188362076209e-122	2.26902	FOXJ3	High	Oli
SLC9B1	9.29435	0.814008	5.63061399306419e-118	2.48605	FOXJ3	High	Oli
FRYL	23.3625	0.809513	1.09581739320204e-115	4.41147	FOXJ3	High	Oli
SGK1	23.2287	0.803198	1.42773291012005e-112	2.77775	FOXJ3	High	Oli
TXNDC5	10.0249	0.802108	4.79673519186811e-112	2.05674	FOXJ3	High	Oli
NINJ2	17.8259	0.777242	7.14801678025679e-101	2.09898	FOXJ3	High	Oli
SH3BP4	32.0353	0.772873	4.65823247392337e-99	3.41599	FOXJ3	High	Oli
EVI2A	16.9684	0.769938	7.30435095761208e-98	2.1818	FOXJ3	High	Oli
NUBPL	9.07089	0.757237	6.924700418144e-93	3.57846	FOXJ3	High	Oli
KBTBD3	15.6989	0.755177	4.15149033378769e-92	3.52766	FOXJ3	High	Oli
YARS2	10.8564	0.733632	2.09800493524155e-84	2.4677	FOXJ3	High	Oli
MSANTD4	10.9893	0.730899	1.76053504103049e-83	2.32332	FOXJ3	High	Oli
TRAPPC13	12.2475	0.72784	1.84772044997599e-82	2.68642	FOXJ3	High	Oli
USP34	11.2405	0.705552	2.00395252033702e-75	2.32332	FOXJ3	High	Oli
FAM114A1	20.0685	0.698927	1.84923494659983e-73	2.70331	FOXJ3	High	Oli
DRAP1	13.4828	0.69635	1.03980484562437e-72	2.05674	FOXJ3	High	Oli
ASB4	18.6166	0.693943	5.13173987072406e-72	2.43945	FOXJ3	High	Oli
NCOA7-AS1	25.5525	0.676009	4.65617273586716e-67	2.26902	FOXJ3	High	Oli
PDK4	25.3514	0.637131	1.958548665694e-57	2.16232	FOXJ3	High	Oli
PON3	23.2046	0.631837	3.1411518883924e-56	2.85038	FOXJ3	High	Oli
RTTN	9.38485	0.606738	8.03831196118193e-51	2.09898	FOXJ3	High	Oli
SEMA6A-AS1	10.413	0.606079	1.09854596951984e-50	2.09898	FOXJ3	High	Oli
PON2	25.0835	0.56169	3.07184207695934e-42	2.63411	FOXJ3	High	Oli
REV3L	23.5296	0.55866	1.04252896872971e-41	3.83453	FOXJ3	High	Oli
ANO4	10.6274	0.547159	9.63929732210942e-40	2.69895	FOXJ3	High	Oli
SASH1	22.6532	0.542629	5.46707246210569e-39	3.50058	FOXJ3	High	Oli
ZFAND5	11.0742	0.54034	1.30125443236983e-38	2.32332	FOXJ3	High	Oli
HINT3	16.3836	0.53594	6.7581903559757e-38	2.29442	FOXJ3	High	Oli
TRAF3IP2	24.634	0.53222	2.67125612086542e-37	2.56753	FOXJ3	High	Oli
FOXO3	9.85815	0.514907	1.28392053561374e-34	2.90641	FOXJ3	High	Oli
OCIAD1	7.58853	0.512105	3.37438426925794e-34	2.32332	FOXJ3	High	Oli
WNK1	9.47786	0.50291	7.56264094219301e-33	2.36535	FOXJ3	High	Oli
ZNF608	45.6532	0.918259	6.23877482926852e-200	2.82157	FOXN2	High	Oli
GTF2IRD2	10.5402	0.845482	5.7115061724765e-136	2.30836	FOXN2	High	Oli
C21orf62-AS1	18.6757	0.838132	2.00259635219667e-131	2.75041	FOXN2	High	Oli
ERBIN	22.0695	0.837646	3.93185425703674e-131	2.30799	FOXN2	High	Oli
PAXBP1	16.2573	0.834112	4.91395456018123e-129	2.62907	FOXN2	High	Oli
TMEM87A	13.7244	0.825097	6.70600381168071e-124	2.30836	FOXN2	High	Oli
PAQR8	12.1652	0.803025	1.73214505487513e-112	2.11708	FOXN2	High	Oli
C21orf62	26.7967	0.792405	1.67461189500308e-107	2.37313	FOXN2	High	Oli
AGMO	14.0235	0.791103	6.5223565885044e-107	2.35962	FOXN2	High	Oli
FRYL	23.906	0.788413	1.05205005840003e-105	3.69633	FOXN2	High	Oli
SGK1	23.7617	0.788225	1.27525980050688e-105	2.06966	FOXN2	High	Oli
URI1	9.31678	0.781106	1.64163663796356e-102	2.23266	FOXN2	High	Oli
SLC9B1	9.87085	0.780897	2.01807332781604e-102	2.1223	FOXN2	High	Oli
CLCC1	10.198	0.777305	6.72589867969794e-101	2.01123	FOXN2	High	Oli
DST	9.21092	0.764116	1.52737039144454e-95	2.35962	FOXN2	High	Oli
SH3BP4	38.6554	0.759288	1.14174865105028e-93	2.66012	FOXN2	High	Oli
TMEM161B	12.5476	0.752691	3.52909207032368e-91	2.13447	FOXN2	High	Oli
ERMN	22.6066	0.749311	6.20828423997108e-90	2.05281	FOXN2	High	Oli
GPR37	27.4789	0.742983	1.18306688330697e-87	2.07262	FOXN2	High	Oli
RNF141	15.8081	0.741033	5.7797573621358e-87	2.01123	FOXN2	High	Oli
CDK19	10.8851	0.735714	4.07785166371813e-85	2.01123	FOXN2	High	Oli
KBTBD3	15.5395	0.729354	5.79615572101994e-83	3.03648	FOXN2	High	Oli
GANC	8.09827	0.718381	2.16817191023071e-79	2.81614	FOXN2	High	Oli
TRAPPC13	12.4845	0.712631	1.38375508342909e-77	2.13447	FOXN2	High	Oli
LPGAT1	24.0081	0.705203	2.55092550127921e-75	3.40509	FOXN2	High	Oli
ZFHX4	33.3301	0.669179	2.91452944215764e-65	2.04617	FOXN2	High	Oli
FAM114A1	25.2239	0.668558	4.22231790029407e-65	2.73934	FOXN2	High	Oli
APCDD1	22.8746	0.657875	2.16176236775767e-62	3.20208	FOXN2	High	Oli
MRPS22	8.12353	0.646769	1.08858517402898e-59	2.1223	FOXN2	High	Oli
PON3	26.189	0.610965	1.06724036486615e-51	2.90826	FOXN2	High	Oli
ARHGAP31	26.7062	0.598272	4.19411439124452e-49	2.35962	FOXN2	High	Oli
REV3L	23.3261	0.560936	4.16766134041809e-42	2.89803	FOXN2	High	Oli
ANO4	10.5866	0.553844	7.08979211918003e-41	2.23266	FOXN2	High	Oli
PON2	28.0591	0.540833	1.08034440564152e-38	2.66012	FOXN2	High	Oli
ATIC	12.8029	0.540011	1.47346252718755e-38	2.50011	FOXN2	High	Oli
FN1	15.0138	0.528783	9.36170190274821e-37	2.65695	FOXN2	High	Oli
TRAF3IP2	28.1603	0.512904	2.5648526944939e-34	2.58407	FOXN2	High	Oli
INTS6	8.06582	0.506678	2.13934063067775e-33	2.30836	FOXN2	High	Oli
DTD2	14.5855	0.865834	6.84582178261868e-150	2.67679	FOXP4	High	Oli
ERBIN	23.7688	0.863429	3.93502880705246e-148	3.0372	FOXP4	High	Oli
SLIRP	12.4319	0.858067	2.52662993645207e-144	2.18175	FOXP4	High	Oli
HBP1	7.9421	0.843324	1.30342441553578e-134	2.02371	FOXP4	High	Oli
PHLPP1	16.4803	0.836243	2.7075680299857e-130	2.5175	FOXP4	High	Oli
DAAM2	24.7699	0.828552	7.83943307238484e-126	2.11308	FOXP4	High	Oli
SCD5	19.816	0.822625	1.52188362076209e-122	2.26902	FOXP4	High	Oli
SLC9B1	10.1846	0.814008	5.63061399306419e-118	2.48605	FOXP4	High	Oli
FRYL	25.2734	0.809513	1.09581739320204e-115	4.41147	FOXP4	High	Oli
SGK1	25.8094	0.803198	1.42773291012005e-112	2.77775	FOXP4	High	Oli
TXNDC5	10.5631	0.802108	4.79673519186811e-112	2.05674	FOXP4	High	Oli
NINJ2	19.4432	0.777242	7.14801678025679e-101	2.09898	FOXP4	High	Oli
SH3BP4	34.2965	0.772873	4.65823247392337e-99	3.41599	FOXP4	High	Oli
EVI2A	18.0269	0.769938	7.30435095761208e-98	2.1818	FOXP4	High	Oli
NUBPL	9.55793	0.757237	6.924700418144e-93	3.57846	FOXP4	High	Oli
KBTBD3	17.1914	0.755177	4.15149033378769e-92	3.52766	FOXP4	High	Oli
YARS2	11.6708	0.733632	2.09800493524155e-84	2.4677	FOXP4	High	Oli
MSANTD4	11.8692	0.730899	1.76053504103049e-83	2.32332	FOXP4	High	Oli
TRAPPC13	13.2532	0.72784	1.84772044997599e-82	2.68642	FOXP4	High	Oli
USP34	12.1376	0.705552	2.00395252033702e-75	2.32332	FOXP4	High	Oli
FAM114A1	21.7339	0.698927	1.84923494659983e-73	2.70331	FOXP4	High	Oli
DRAP1	14.6874	0.69635	1.03980484562437e-72	2.05674	FOXP4	High	Oli
ASB4	20.1695	0.693943	5.13173987072406e-72	2.43945	FOXP4	High	Oli
NCOA7-AS1	28.429	0.676009	4.65617273586716e-67	2.26902	FOXP4	High	Oli
PDK4	27.3382	0.637131	1.958548665694e-57	2.16232	FOXP4	High	Oli
PON3	25.1979	0.631837	3.1411518883924e-56	2.85038	FOXP4	High	Oli
RTTN	10.3884	0.606738	8.03831196118193e-51	2.09898	FOXP4	High	Oli
SEMA6A-AS1	11.5178	0.606079	1.09854596951984e-50	2.09898	FOXP4	High	Oli
PON2	27.1784	0.56169	3.07184207695934e-42	2.63411	FOXP4	High	Oli
REV3L	25.3512	0.55866	1.04252896872971e-41	3.83453	FOXP4	High	Oli
ANO4	11.6828	0.547159	9.63929732210942e-40	2.69895	FOXP4	High	Oli
SASH1	24.324	0.542629	5.46707246210569e-39	3.50058	FOXP4	High	Oli
ZFAND5	12.1292	0.54034	1.30125443236983e-38	2.32332	FOXP4	High	Oli
HINT3	18.1414	0.53594	6.7581903559757e-38	2.29442	FOXP4	High	Oli
TRAF3IP2	26.7695	0.53222	2.67125612086542e-37	2.56753	FOXP4	High	Oli
FOXO3	10.8555	0.514907	1.28392053561374e-34	2.90641	FOXP4	High	Oli
OCIAD1	8.20434	0.512105	3.37438426925794e-34	2.32332	FOXP4	High	Oli
WNK1	10.319	0.50291	7.56264094219301e-33	2.36535	FOXP4	High	Oli
GNG12	6.41948	0.816526	2.75752212594475e-119	2.89284	HLX	High	Ast_Inh
SOX2	14.3111	0.806469	3.59568904273926e-114	2.77006	HLX	High	Ast_Inh
GNG12-AS1	8.01448	0.771675	1.43897462211023e-98	3.8607	HLX	High	Ast_Inh
FAT1	10.1591	0.763365	3.00884881851716e-95	2.41154	HLX	High	Ast_Inh
PDE3A	6.76005	0.742949	1.21595533900876e-87	2.5516	HLX	High	Ast_Inh
TNIK	8.77079	0.736103	2.99795362113608e-85	2.33089	HLX	High	Ast_Inh
ZFHX4	22.2048	0.73374	1.92916542980408e-84	3.18546	HLX	High	Ast_Inh
NTM	10.8504	0.717195	5.15094260949116e-79	2.05696	HLX	High	Ast_Inh
GRAMD1C	5.27021	0.698005	3.43817538668117e-73	3.44895	HLX	High	Ast_Inh
TGFBR3	10.4006	0.694501	3.54928080078486e-72	3.41511	HLX	High	Ast_Inh
STK17B	5.19322	0.68462	2.15105121933857e-69	2.77979	HLX	High	Ast_Inh
YARS2	6.33617	0.677183	2.2616721900261e-67	3.26883	HLX	High	Ast_Inh
P2RY1	6.07669	0.672201	4.74098653505027e-66	3.15475	HLX	High	Ast_Inh
MXI1	8.04886	0.666338	1.57757148590437e-64	2.33089	HLX	High	Ast_Inh
ZFHX4-AS1	24.202	0.657311	2.98380496695775e-62	3.53984	HLX	High	Ast_Inh
FAM160B1	14.2691	0.656754	4.0994365720368e-62	3.24964	HLX	High	Ast_Inh
SLCO1C1	10.9136	0.655601	7.8997933925222e-62	3.60016	HLX	High	Ast_Inh
GJA1	9.82167	0.654078	1.86879958341469e-61	4.40871	HLX	High	Ast_Inh
LRTOMT	4.36198	0.653062	3.31009827771799e-61	2.06082	HLX	High	Ast_Inh
ABLIM1	13.4869	0.630949	4.97580600915627e-56	3.60698	HLX	High	Ast_Inh
SMO	8.00659	0.629377	1.11939954741095e-55	3.94447	HLX	High	Ast_Inh
ERBB4	6.66168	0.609554	2.10121004592131e-51	3.26883	HLX	High	Ast_Inh
NADK2	7.73932	0.602257	6.6178961439837e-50	2.25438	HLX	High	Ast_Inh
IL33	5.11521	0.600247	1.68515129815781e-49	3.06593	HLX	High	Ast_Inh
CASP7	9.15117	0.600216	1.70994632839593e-49	2.53963	HLX	High	Ast_Inh
ZNF280D	5.65678	0.599719	2.152562990914e-49	2.42064	HLX	High	Ast_Inh
PEX2	11.3791	0.598111	4.51606363324499e-49	2.31138	HLX	High	Ast_Inh
AHCYL2	7.9804	0.592755	5.17952561512882e-48	3.94447	HLX	High	Ast_Inh
LEKR1	7.38294	0.581883	6.39012382683586e-46	3.8607	HLX	High	Ast_Inh
MSANTD4	8.8103	0.566302	4.66173808109034e-43	2.20098	HLX	High	Ast_Inh
DNAH7	4.24649	0.539553	1.75081323216872e-38	2.77979	HLX	High	Ast_Inh
POLM	15.2577	0.774709	8.14265940135353e-100	2.1666	HNF4G	High	Unknow
RBM5	26.3072	0.736476	2.22992052277561e-85	2.08057	HNF4G	High	Unknow
MCM7	16.551	0.734601	9.80977317923068e-85	2.01209	HNF4G	High	Unknow
DDO	21.4939	0.732327	5.81280466376292e-84	2.01209	HNF4G	High	Unknow
POLD2	17.5555	0.718013	2.83621031862756e-79	2.1666	HNF4G	High	Unknow
TRIM4	21.0489	0.691621	2.35854829625442e-71	3.49932	HNF4G	High	Unknow
ZHX2	34.5817	0.679021	7.24966381093947e-68	2.34189	HNF4G	High	Unknow
RGS3	23.3741	0.67567	5.73444208344585e-67	2.49158	HNF4G	High	Unknow
ZKSCAN1	30.891	0.66069	4.28009345269016e-63	2.59121	HNF4G	High	Unknow
PLCG1-AS1	20.9588	0.657613	2.51155062226865e-62	2.16635	HNF4G	High	Unknow
CSRP1	42.1057	0.656274	5.39022537883229e-62	2.35203	HNF4G	High	Unknow
COPS6	26.6314	0.648648	3.86909979083674e-60	2.59121	HNF4G	High	Unknow
DGLUCY	14.2854	0.645731	1.92074465967084e-59	2.54391	HNF4G	High	Unknow
ALDOC	16.02	0.637642	1.49402971230848e-57	2.1666	HNF4G	High	Unknow
HNRNPF	18.0108	0.634557	7.60095515723648e-57	3.23729	HNF4G	High	Unknow
GPC2	19.8529	0.59043	1.47318562310616e-47	2.45452	HNF4G	High	Unknow
PIPOX	23.6594	0.590397	1.49533841309601e-47	2.03989	HNF4G	High	Unknow
VSX1	38.9573	0.576805	5.6940066973707e-45	2.25434	HNF4G	High	Unknow
ZNF3	25.6145	0.575877	8.4582223484517e-45	2.89894	HNF4G	High	Unknow
SORCS2	37.1205	0.575619	9.43936203085308e-45	3.48981	HNF4G	High	Unknow
ALAD	32.6796	0.55866	1.04271891376506e-41	2.20897	HNF4G	High	Unknow
RAB34	26.6978	0.531872	3.03404178340349e-37	2.45452	HNF4G	High	Unknow
LCNL1	23.2496	0.518893	3.19636459247615e-35	2.45452	HNF4G	High	Unknow
RBMS3-AS3	11.5135	0.515645	9.94022729258493e-35	2.05213	HNF4G	High	Unknow
TEP1	108.751	0.956	2.81645234716689e-264	3.58211	IRF1	High	Mic
TRIB1	77.0482	0.952277	9.58623331571235e-256	2.07789	IRF1	High	Mic
CFLAR	142.577	0.94737	1.70230766199874e-245	3.69689	IRF1	High	Mic
DTX3L	55.2562	0.947017	8.46021478417005e-245	4.07242	IRF1	High	Mic
SP110	69.1968	0.942897	5.58880896229395e-237	2.64593	IRF1	High	Mic
PARP14	54.243	0.938089	1.34866421118869e-228	2.95643	IRF1	High	Mic
APOL3	61.4865	0.936329	1.06566302950388e-225	2.47334	IRF1	High	Mic
ENTPD1	148.491	0.929053	1.64958909773052e-214	3.47851	IRF1	High	Mic
PARP9	49.1541	0.928397	1.46008915160909e-213	3.50654	IRF1	High	Mic
IL6ST	128.398	0.927606	1.97842320662888e-212	2.74466	IRF1	High	Mic
TAB2	180.601	0.921922	1.21208853457512e-204	3.078	IRF1	High	Mic
NMI	62.9894	0.920925	2.45889787197148e-203	2.46053	IRF1	High	Mic
PNP	104.518	0.920376	1.26086608006518e-202	3.21195	IRF1	High	Mic
APOBEC3G	99.3974	0.917811	2.26194636332401e-199	2.66148	IRF1	High	Mic
HLA-B	142.145	0.916032	3.55374456640116e-197	2.47334	IRF1	High	Mic
CLEC2D	64.6465	0.914349	3.82142970596982e-195	2.76616	IRF1	High	Mic
ZFHX3	122.714	0.908719	1.21104424246737e-188	2.48492	IRF1	High	Mic
MAML2	55.6242	0.903622	4.05469665996576e-183	3.03772	IRF1	High	Mic
NAA20	64.4706	0.902649	4.23339540685347e-182	2.80754	IRF1	High	Mic
PAK1IP1	81.5058	0.90145	7.36068057282128e-181	4.06697	IRF1	High	Mic
TLR3	53.3644	0.900173	1.48323474633439e-179	2.47334	IRF1	High	Mic
SLC16A13	91.9164	0.898665	4.87542534439956e-178	4.13861	IRF1	High	Mic
EDNRB-AS1	50.7336	0.898013	2.17635922297881e-177	2.44552	IRF1	High	Mic
SOAT1	50.2477	0.895441	7.18718254733609e-175	2.06835	IRF1	High	Mic
GPCPD1	89.2825	0.892947	1.73219996787857e-172	3.01887	IRF1	High	Mic
RUBCNL	84.5273	0.892582	3.82715665363145e-172	2.19885	IRF1	High	Mic
GDI2	190.099	0.88191	1.30880375770054e-162	5.05357	IRF1	High	Mic
TNFAIP3	140.538	0.877833	3.26995965414501e-159	4.22572	IRF1	High	Mic
HSPA6	98.3556	0.87724	9.96939817836095e-159	2.06995	IRF1	High	Mic
TNFSF10	60.4051	0.876244	6.37613650486932e-158	2.64593	IRF1	High	Mic
CASP10	214.142	0.87614	7.72708231563442e-158	3.69689	IRF1	High	Mic
MRPS28	45.4564	0.87569	1.77583381135117e-157	2.06995	IRF1	High	Mic
LGALS9	66.9224	0.874231	2.58384149383528e-156	2.06995	IRF1	High	Mic
LENG9	182.238	0.873339	1.30670977418213e-155	2.08363	IRF1	High	Mic
FPR3	133.427	0.871713	2.41564142113695e-154	2.8926	IRF1	High	Mic
LAIR1	206.103	0.869085	2.51401600641931e-152	2.20262	IRF1	High	Mic
ADPRH	89.6468	0.869085	2.51536824801979e-152	2.21901	IRF1	High	Mic
EPSTI1	57.8866	0.868967	3.08873929308053e-152	3.50654	IRF1	High	Mic
TLR6	166.874	0.86879	4.20296607872753e-152	3.29056	IRF1	High	Mic
CASP8	219.451	0.868709	4.84715575809716e-152	3.9944	IRF1	High	Mic
CLEC9A	154.872	0.867679	2.9014758554503e-151	2.95299	IRF1	High	Mic
LILRB1	163.545	0.867268	5.88912338241792e-151	2.59716	IRF1	High	Mic
TLR1	165.892	0.867159	7.10551110831652e-151	2.22683	IRF1	High	Mic
CLEC1A	156.528	0.86704	8.71434530438811e-151	3.42645	IRF1	High	Mic
COLGALT1	164.973	0.866951	1.01618095915716e-150	2.89604	IRF1	High	Mic
MNDA	54.0732	0.866425	2.50060075445866e-150	2.44552	IRF1	High	Mic
CLEC2B	80.0739	0.866359	2.79559010589492e-150	2.66148	IRF1	High	Mic
TLR7	72.1946	0.866122	4.1939240214392e-150	2.36726	IRF1	High	Mic
BACH1	49.2891	0.865943	5.69156446108586e-150	2.36726	IRF1	High	Mic
CD163	95.6824	0.86589	6.22429603045817e-150	2.06835	IRF1	High	Mic
CLEC7A	137.163	0.865344	1.57098723297175e-149	3.03772	IRF1	High	Mic
HNRNPA3	50.3723	0.864925	3.19493966438972e-149	2.64593	IRF1	High	Mic
SP100	187.243	0.864787	4.03347084787424e-149	2.36726	IRF1	High	Mic
TMEM156	139.521	0.864465	6.93485860124029e-149	2.47334	IRF1	High	Mic
LPAR6	61.6821	0.864342	8.53082123399877e-149	2.29914	IRF1	High	Mic
TGFBR2	190.958	0.863629	2.81933250175185e-148	3.46275	IRF1	High	Mic
LHFPL2	111.566	0.863541	3.2636646497139e-148	2.25493	IRF1	High	Mic
CCR1	229.731	0.86327	5.13186418888849e-148	2.4821	IRF1	High	Mic
CHD1	80.9875	0.863145	6.3195212327779e-148	2.44552	IRF1	High	Mic
ALPK1	90.9034	0.863122	6.56245381088504e-148	2.3956	IRF1	High	Mic
GPR183	127.316	0.862817	1.09182408012372e-147	2.20177	IRF1	High	Mic
CLDN7	122.841	0.862454	1.99388506304895e-147	3.66998	IRF1	High	Mic
FCGR2B	87.5184	0.862218	2.94660836307765e-147	2.06995	IRF1	High	Mic
CLECL1	67.7172	0.861831	5.57950459245256e-147	2.76616	IRF1	High	Mic
FCGR3A	97.6076	0.860957	2.33873818183028e-146	2.06995	IRF1	High	Mic
VSIG4	51.8438	0.860769	3.18410032658084e-146	2.19885	IRF1	High	Mic
SP140L	69.7859	0.858926	6.349091657064e-145	2.64593	IRF1	High	Mic
FPR1	138.874	0.857273	8.96286007417376e-144	2.8926	IRF1	High	Mic
FAM149A	53.7723	0.856576	2.71514472914826e-143	2.47334	IRF1	High	Mic
ST6GAL1	149.302	0.856185	5.03959113968662e-143	2.55248	IRF1	High	Mic
CC2D2B	79.1294	0.854702	5.15926961048482e-142	2.94698	IRF1	High	Mic
OLR1	156.613	0.854568	6.36400073634186e-142	3.82643	IRF1	High	Mic
FGF20	78.8351	0.853431	3.71048697596991e-141	2.19885	IRF1	High	Mic
IL15RA	313.921	0.853401	3.88467233128733e-141	4.69028	IRF1	High	Mic
RCSD1	205.56	0.853312	4.45260791943196e-141	2.25493	IRF1	High	Mic
RHOA	67.5087	0.853085	6.32037049366937e-141	2.19885	IRF1	High	Mic
CD69	66.3379	0.852226	2.36344723836575e-140	2.76616	IRF1	High	Mic
RPL39	43.4508	0.852076	2.97465161575871e-140	2.06835	IRF1	High	Mic
TMEM14C	61.6647	0.851145	1.23186783738107e-139	3.10781	IRF1	High	Mic
TMEM52B	130.633	0.850528	3.14265775376682e-139	3.69689	IRF1	High	Mic
LILRA2	201.721	0.847824	1.81253918090168e-137	2.84633	IRF1	High	Mic
LILRA1	189.278	0.846743	8.97326501180488e-137	2.66815	IRF1	High	Mic
CTSB	152.072	0.845366	6.77150170488323e-136	2.89604	IRF1	High	Mic
LARP4	43.9746	0.843049	1.93355363660294e-134	3.07568	IRF1	High	Mic
RCBTB2	52.4803	0.841848	1.07649952215732e-133	2.1483	IRF1	High	Mic
SEMA6A-AS1	56.4763	0.838931	6.58685767625573e-132	3.15589	IRF1	High	Mic
STXBP2	57.2231	0.838765	8.30069509431586e-132	2.19885	IRF1	High	Mic
NLRP3	70.2016	0.838705	9.0291514834942e-132	2.06995	IRF1	High	Mic
PDGFB	87.3505	0.835003	1.46905186075128e-129	2.06331	IRF1	High	Mic
SLC25A19	186.707	0.822466	1.85540912991148e-122	2.29914	IRF1	High	Mic
SP140	105.178	0.822256	2.41434997956535e-122	3.5138	IRF1	High	Mic
HIST1H2BD	104.278	0.821131	9.81711092606623e-122	2.33468	IRF1	High	Mic
LINC02611	46.5923	0.818017	4.52416917018678e-120	2.21901	IRF1	High	Mic
PGLS	86.7269	0.816909	1.73723660628644e-119	2.29914	IRF1	High	Mic
GNB4	46.873	0.8094	1.24914326154473e-115	4.64335	IRF1	High	Mic
LPP	58.1967	0.806312	4.30082738153726e-114	3.32555	IRF1	High	Mic
BTN3A2	123.172	0.798085	3.92932810926532e-110	2.44552	IRF1	High	Mic
DNAJC15	54.8288	0.793868	3.58300468195159e-108	3.50654	IRF1	High	Mic
DDX54	43.7032	0.78946	3.57923605660801e-106	2.61353	IRF1	High	Mic
UGCG	160.752	0.784128	8.12782450324087e-104	2.76616	IRF1	High	Mic
HECA	66.9367	0.782878	2.83513020884094e-103	4.0189	IRF1	High	Mic
ETV5	49.4613	0.781048	1.73864427060891e-102	2.76616	IRF1	High	Mic
HIST1H1D	148.087	0.765285	5.29817179076471e-96	2.1483	IRF1	High	Mic
BTN3A1	59.5599	0.76089	2.76134645076035e-94	2.94698	IRF1	High	Mic
MEMO1	80.3551	0.758892	1.6195689782831e-93	2.46053	IRF1	High	Mic
FBH1	116.368	0.752177	5.47316504341696e-91	3.47851	IRF1	High	Mic
TMCC3	202.371	0.744694	2.90534565299642e-88	2.48935	IRF1	High	Mic
GNLY	129.029	0.739278	2.3809302979793e-86	2.05761	IRF1	High	Mic
RAC1	91.2272	0.721503	2.17178998071836e-80	2.06995	IRF1	High	Mic
USP4	72.0956	0.712307	1.74383781614895e-77	2.19885	IRF1	High	Mic
RBM17	110.258	0.707461	5.31823470104184e-76	2.51474	IRF1	High	Mic
MGAT5	47.5524	0.698736	2.10329657771183e-73	2.53614	IRF1	High	Mic
CDKN2AIP	78.4399	0.691855	2.02393088588113e-71	3.50654	IRF1	High	Mic
CLTC	60.0615	0.681767	1.30427647917925e-68	2.06835	IRF1	High	Mic
GGA3	189.254	0.675335	7.03915594228831e-67	2.1044	IRF1	High	Mic
LINC01356	88.8251	0.667712	6.98577540120285e-65	2.44552	IRF1	High	Mic
GPD2	55.4699	0.643832	5.401608133357e-59	2.06995	IRF1	High	Mic
LRMP	108.179	0.642683	1.006243688479e-58	4.22572	IRF1	High	Mic
LEKR1	54.8447	0.62559	7.752380073711e-55	2.1483	IRF1	High	Mic
TBC1D9	54.7084	0.608061	4.2876895952257e-51	2.21901	IRF1	High	Mic
HCP5	130.654	0.607534	5.50983378977887e-51	2.07789	IRF1	High	Mic
TET3	115.426	0.603844	3.14870020213228e-50	2.64593	IRF1	High	Mic
KLHL5	54.5955	0.553651	7.65173306431924e-41	3.15589	IRF1	High	Mic
TIFA	75.4825	0.553504	8.10787707180712e-41	2.44552	IRF1	High	Mic
GCH1	67.3218	0.505982	2.70437659935596e-33	2.06995	IRF1	High	Mic
SP110	24.8146	0.908012	7.41191419509269e-188	4.10665	IRF2	High	Mic
BRD2	35.4121	0.894073	1.47940133407249e-173	2.21672	IRF2	High	Mic
PSMB9	40.6577	0.875629	1.98581684044987e-157	2.2971	IRF2	High	Mic
TENT5A	20.4018	0.87351	9.5898041050611e-156	2.26343	IRF2	High	Mic
RAB20	22.7733	0.857961	2.99163861735488e-144	2.21672	IRF2	High	Mic
IL6ST	20.2859	0.846831	7.88359100848285e-137	2.66083	IRF2	High	Mic
BTN2A1	9.75162	0.838174	1.88782737599315e-131	2.00484	IRF2	High	Mic
TGIF2	16.0823	0.81782	5.75223412675049e-120	2.00484	IRF2	High	Mic
COX17	12.1831	0.815405	1.06341213914091e-118	2.16364	IRF2	High	Mic
BTN3A1	8.92266	0.812099	5.3808366714006e-117	3.13821	IRF2	High	Mic
ATL3	16.01	0.811808	7.57417730143671e-117	2.54178	IRF2	High	Mic
HIST1H2BD	13.6482	0.799961	5.09814893265024e-111	2.85803	IRF2	High	Mic
TRIM34	14.9563	0.79052	1.19674497351261e-106	2.00484	IRF2	High	Mic
CASP4	15.8927	0.777552	5.29662010733886e-101	2.26343	IRF2	High	Mic
TNFAIP3	27.0963	0.777471	5.72815166491295e-101	2.82583	IRF2	High	Mic
TNFSF10	16.4302	0.771608	1.53299252189518e-98	3.04294	IRF2	High	Mic
FPR3	25.0359	0.770412	4.7008703090346e-98	2.40484	IRF2	High	Mic
ADPRH	29.5395	0.767443	7.35925243067932e-97	3.2759	IRF2	High	Mic
BTBD1	9.34044	0.767364	7.91280024831082e-97	2.00484	IRF2	High	Mic
HIST1H2BH	20.1416	0.765799	3.31615194106385e-96	2.54178	IRF2	High	Mic
MAP3K1	8.77692	0.764936	7.27449902537777e-96	2.40484	IRF2	High	Mic
HIST1H2BF	22.0484	0.761713	1.32566005412265e-94	2.2793	IRF2	High	Mic
XAF1	12.0935	0.76007	5.71778839341455e-94	2.26343	IRF2	High	Mic
CD163	24.0125	0.754448	7.79853092208264e-92	2.63188	IRF2	High	Mic
SP140L	27.6674	0.753658	1.5408627495851e-91	3.04294	IRF2	High	Mic
PCED1B-AS1	32.4656	0.751637	8.67826908505742e-91	3.86204	IRF2	High	Mic
SP100	27.9546	0.749647	4.67669613632859e-90	2.16364	IRF2	High	Mic
FGF20	18.0637	0.745393	1.63187663973706e-88	2.26343	IRF2	High	Mic
SCIN	16.204	0.745144	2.00491463000976e-88	2.8622	IRF2	High	Mic
ITGB3	20.5353	0.744474	3.4800381614784e-88	2.11208	IRF2	High	Mic
DOCK2	9.65733	0.742246	2.15945956340723e-87	2.22456	IRF2	High	Mic
FPR1	26.2195	0.741603	3.64235365320281e-87	2.40484	IRF2	High	Mic
DENND4B	8.47474	0.738749	3.64140658605902e-86	2.00484	IRF2	High	Mic
ST6GAL1	18.8784	0.738025	6.49915359383766e-86	2.56288	IRF2	High	Mic
OR52K1	11.2465	0.737026	1.44056325810577e-85	2.22456	IRF2	High	Mic
SNRPG	10.3463	0.733726	1.95064173948956e-84	2.43491	IRF2	High	Mic
LTV1	8.66471	0.72465	2.06934576587539e-81	2.22456	IRF2	High	Mic
PCED1B	18.7901	0.71527	2.0793827982518e-78	2.96405	IRF2	High	Mic
PARP15	11.2853	0.707768	4.29099440327648e-76	2.00484	IRF2	High	Mic
SP140	28.9835	0.704041	5.68728926724402e-75	4.10665	IRF2	High	Mic
TMA16	9.49452	0.696392	1.01115526188136e-72	2.11208	IRF2	High	Mic
TCF12	12.2808	0.6926	1.2420269430183e-71	2.05664	IRF2	High	Mic
TRIM22	16.0385	0.688231	2.1325279289202e-70	2.8622	IRF2	High	Mic
ZSWIM6	9.61923	0.680789	2.40741048465002e-68	2.43491	IRF2	High	Mic
LINC00926	10.407	0.671764	6.17411674514364e-66	2.43491	IRF2	High	Mic
GPD2	10.7443	0.669848	1.95388218338183e-65	2.69203	IRF2	High	Mic
TAP2	19.0321	0.656028	6.19618268970723e-62	2.05664	IRF2	High	Mic
NBR1	9.44902	0.651574	7.61949610227969e-61	2.00484	IRF2	High	Mic
HIST1H1D	18.7483	0.651215	9.30846647401818e-61	2.05664	IRF2	High	Mic
ZNF280D	12.4159	0.646621	1.18009901741421e-59	2.54178	IRF2	High	Mic
TIA1	9.78543	0.638049	1.20397102210848e-57	3.48111	IRF2	High	Mic
TAP1	12.8624	0.635869	3.81398934116624e-57	2.50217	IRF2	High	Mic
FCAR	20.8078	0.63317	1.56988393514618e-56	2.43491	IRF2	High	Mic
CD163L1	19.9721	0.600906	1.2411383258124e-49	2.43491	IRF2	High	Mic
BATF3	18.9663	0.586478	8.538763867687e-47	2.85803	IRF2	High	Mic
PLAGL1	9.14115	0.58024	1.30193774716916e-45	2.22456	IRF2	High	Mic
CA8	14.0739	0.528129	1.1865351123561e-36	2.11208	IRF2	High	Mic
PARP14	32.9849	0.917923	1.6424470000105e-199	2.11537	IRF3	High	Mic
FAM111A	16.2986	0.914503	2.50278140732723e-195	2.33584	IRF3	High	Mic
DAP	17.1851	0.91341	4.98098723715734e-194	3.09706	IRF3	High	Mic
DTX3L	32.7336	0.911028	2.95813958849893e-191	2.11537	IRF3	High	Mic
APOL3	28.7982	0.908999	5.88681243714903e-189	2.70025	IRF3	High	Mic
SP110	26.3876	0.907615	2.03325148358873e-187	2.40782	IRF3	High	Mic
HLA-B	40.3399	0.905982	1.22899335356265e-185	3.57103	IRF3	High	Mic
SLC16A13	39.0166	0.896574	5.69771066704035e-176	4.04852	IRF3	High	Mic
RNF213	14.9491	0.895572	5.38172810425724e-175	2.40782	IRF3	High	Mic
TNFAIP3	31.6981	0.888533	2.07599263225661e-168	2.11463	IRF3	High	Mic
EPSTI1	24.8786	0.886599	1.1172651635014e-166	3.41267	IRF3	High	Mic
CARD16	35.0955	0.885364	1.37357742365012e-165	2.23312	IRF3	High	Mic
LGALS9	14.9646	0.882271	6.45630866692051e-163	2.07729	IRF3	High	Mic
CASP1	36.0273	0.87562	2.01978589443444e-157	2.23312	IRF3	High	Mic
CLDN7	51.5981	0.875608	2.06740478352019e-157	4.2857	IRF3	High	Mic
TLR7	13.0984	0.875153	4.7765697726089e-157	2.24246	IRF3	High	Mic
SP100	47.3769	0.873942	4.37115027637061e-156	3.83222	IRF3	High	Mic
PARP9	31.1081	0.870621	1.68454661307928e-153	2.33584	IRF3	High	Mic
SP140L	39.0481	0.869431	1.37043476846299e-152	3.32172	IRF3	High	Mic
CASP5	33.87	0.865645	9.43645536629312e-150	2.23312	IRF3	High	Mic
ST6GAL1	27.4351	0.865538	1.13186511321344e-149	2.36731	IRF3	High	Mic
HSPBAP1	24.7551	0.865095	2.39819572632996e-149	2.11537	IRF3	High	Mic
FGF20	17.093	0.863642	2.75651894221942e-148	2.60564	IRF3	High	Mic
SLA	23.5961	0.855034	3.06815571382057e-142	2.58923	IRF3	High	Mic
NCMAP	14.5241	0.855011	3.18197105187323e-142	2.11537	IRF3	High	Mic
RPL21	10.6839	0.850949	1.65902849963512e-139	2.02013	IRF3	High	Mic
RPS25	10.6608	0.841319	2.28263268061174e-133	2.33584	IRF3	High	Mic
SP140	37.5169	0.837969	2.51000869032059e-131	3.32172	IRF3	High	Mic
DNAJC15	22.8219	0.83035	7.44421321458081e-127	3.41267	IRF3	High	Mic
OAS2	38.9217	0.82381	3.42520578956796e-123	2.11537	IRF3	High	Mic
SLC15A2	18.0748	0.819697	5.78744161054924e-121	2.18245	IRF3	High	Mic
HLA-F	15.5593	0.817501	8.47879709115226e-120	3.88993	IRF3	High	Mic
GNB4	15.0825	0.813783	7.3625921681282e-118	2.83251	IRF3	High	Mic
BTN3A2	11.4067	0.808919	2.17921463517912e-115	2.33584	IRF3	High	Mic
DENND4C	10.8725	0.804682	2.71387954781917e-113	2.93482	IRF3	High	Mic
GLDN	14.3677	0.763848	1.94630998288972e-95	2.11463	IRF3	High	Mic
PARP12	23.9924	0.761636	1.42027883935592e-94	2.53337	IRF3	High	Mic
GABPB1-IT1	25.523	0.761544	1.5411215551864e-94	2.11537	IRF3	High	Mic
BATF3	31.9694	0.731397	1.19732903005722e-83	2.23312	IRF3	High	Mic
AGPS	11.1101	0.72021	5.65389530611282e-80	2.09615	IRF3	High	Mic
KDM7A	14.8763	0.715985	1.23990293030475e-78	2.40782	IRF3	High	Mic
RAB12	23.9697	0.704399	4.44252700329371e-75	2.83251	IRF3	High	Mic
HCP5	37.9694	0.637138	1.95146110862841e-57	2.71043	IRF3	High	Mic
CMIP	13.413	0.62896	1.3871076907956e-55	2.60564	IRF3	High	Mic
ECT2	10.1458	0.62141	6.36428499536415e-54	2.09615	IRF3	High	Mic
EEF1AKNMT	12.3833	0.593043	4.54784521900683e-48	3.41267	IRF3	High	Mic
GPD2	15.6794	0.583118	3.73132938883743e-46	2.07729	IRF3	High	Mic
GCH1	13.0644	0.534657	1.08807916310657e-37	2.07729	IRF3	High	Mic
LAP3	10.6084	0.931415	5.23813522447381e-218	2.06551	IRF8	High	Mic
RNF213	16.671	0.926493	7.41938108407339e-211	2.51257	IRF8	High	Mic
PATL2	12.344	0.926405	9.88375165977838e-211	2.54312	IRF8	High	Mic
APOBEC3F	22.9381	0.92383	3.44443689149828e-207	2.53129	IRF8	High	Mic
TNFRSF10B	20.2305	0.923034	4.0501662298425e-206	2.7656	IRF8	High	Mic
GAA	21.7683	0.916143	2.59775021278274e-197	3.0494	IRF8	High	Mic
PARP9	20.334	0.912346	8.8429923697412e-193	2.13185	IRF8	High	Mic
APOL3	21.5464	0.906483	3.52572479789466e-186	2.12909	IRF8	High	Mic
ADA2	20.8801	0.903852	2.3169136144465e-183	2.37193	IRF8	High	Mic
APOBEC3G	30.2819	0.901691	4.15418421931325e-181	3.03722	IRF8	High	Mic
LINC01909	18.9027	0.900253	1.22911816817878e-179	2.32777	IRF8	High	Mic
TNFRSF10C	22.5384	0.89032	4.87686788390875e-170	2.53129	IRF8	High	Mic
TLR3	18.2291	0.884988	2.93024246000238e-165	2.12909	IRF8	High	Mic
ATP7A	7.9227	0.876471	4.18289050089183e-158	2.06551	IRF8	High	Mic
SOCS6	19.1751	0.876388	4.88182001315731e-158	2.2355	IRF8	High	Mic
CHD1	12.5803	0.876134	7.82228557851319e-158	2.13185	IRF8	High	Mic
HFE	9.99601	0.87499	6.44361424731657e-157	2.13185	IRF8	High	Mic
MAX	19.433	0.872546	5.44881648099107e-155	2.53129	IRF8	High	Mic
ITM2B	14.1019	0.870675	1.53201137122344e-153	2.14873	IRF8	High	Mic
XBP1	8.63785	0.86727	5.86489999771134e-151	2.31805	IRF8	High	Mic
EPSTI1	18.5422	0.864828	3.76462677134331e-149	4.62907	IRF8	High	Mic
CASP4	18.7615	0.863975	1.5802424027078e-148	2.66957	IRF8	High	Mic
FPR3	21.5107	0.860643	3.91364424155101e-146	2.02309	IRF8	High	Mic
TNFRSF10A	18.1279	0.860071	9.95314314200983e-146	2.02309	IRF8	High	Mic
IL17RA	24.2999	0.856759	2.03145176744534e-143	2.66957	IRF8	High	Mic
CASP5	17.7055	0.854753	4.76611655657224e-142	2.37193	IRF8	High	Mic
IFI44	12.0478	0.854295	9.72548287632272e-142	2.82612	IRF8	High	Mic
CARD16	18.5142	0.853702	2.44028329668274e-141	2.37193	IRF8	High	Mic
CXorf21	11.6773	0.85198	3.44229657421348e-140	2.13185	IRF8	High	Mic
TNFRSF10D	22.1627	0.851867	4.0970105692629e-140	2.53129	IRF8	High	Mic
HIST1H2BF	18.9632	0.84944	1.62238020833741e-138	2.7656	IRF8	High	Mic
RGS19	16.3459	0.848705	4.878815691458e-138	2.02309	IRF8	High	Mic
CASP1	19.2113	0.847515	2.86781120757517e-137	2.37193	IRF8	High	Mic
PCED1B-AS1	30.0924	0.847062	5.60543163974494e-137	2.64411	IRF8	High	Mic
HIST1H2BH	18.6205	0.846949	6.62879864552663e-137	3.03983	IRF8	High	Mic
LPAR6	20.4992	0.845047	1.07756804856523e-135	2.32777	IRF8	High	Mic
STX11	24.2548	0.842318	5.50848651444351e-134	2.12909	IRF8	High	Mic
FPR1	22.5299	0.840916	4.04260413873473e-133	2.02309	IRF8	High	Mic
FAM149A	18.2918	0.839159	4.78383610186636e-132	2.12909	IRF8	High	Mic
FAU	10.9932	0.835149	1.20461710001755e-129	2.12909	IRF8	High	Mic
ITGB3	17.9849	0.834123	4.84169867987723e-129	2.51257	IRF8	High	Mic
HIST1H2BD	12.1133	0.831495	1.63719315038765e-127	2.37193	IRF8	High	Mic
MBNL1	8.03836	0.831332	2.03059521170882e-127	2.13185	IRF8	High	Mic
ARHGAP25	21.6576	0.831141	2.62053984638186e-127	2.14873	IRF8	High	Mic
RPS25	10.6065	0.83057	5.57547416725682e-127	2.13185	IRF8	High	Mic
OR52K1	9.22196	0.828246	1.167339225188e-125	2.54312	IRF8	High	Mic
PLXDC2	9.39311	0.813327	1.26371275267063e-117	2.24482	IRF8	High	Mic
HLA-F	13.2175	0.804774	2.44694086934874e-113	2.84672	IRF8	High	Mic
PARP15	11.3777	0.799046	1.38401635140482e-110	2.31805	IRF8	High	Mic
SLC15A2	13.9369	0.79521	8.61866013854234e-109	2.06691	IRF8	High	Mic
DDX60	8.91642	0.79418	2.57375383061539e-108	2.06551	IRF8	High	Mic
LTV1	11.969	0.785776	1.54609891530068e-104	2.54312	IRF8	High	Mic
HIST1H2BG	18.3276	0.780615	2.66450187182033e-102	3.36792	IRF8	High	Mic
DNAJC15	16.8019	0.77532	4.54243095536386e-100	4.62907	IRF8	High	Mic
SF3B5	11.1397	0.752495	4.17129187003059e-91	2.37193	IRF8	High	Mic
MIS18BP1	8.17519	0.744947	2.35794396668273e-88	2.06551	IRF8	High	Mic
HIST1H1D	21.2054	0.740731	7.38298999967346e-87	3.41518	IRF8	High	Mic
NRL	7.61853	0.738078	6.22638050980862e-86	2.13185	IRF8	High	Mic
CCDC40	18.6631	0.724496	2.32399102911106e-81	2.66957	IRF8	High	Mic
NANS	16.9671	0.710795	5.10614083801707e-77	2.24482	IRF8	High	Mic
POLA2	9.10002	0.68256	7.92135868820937e-69	2.12909	IRF8	High	Mic
RAB12	10.684	0.658179	1.81573306127253e-62	2.84672	IRF8	High	Mic
PLAGL1	9.99427	0.656734	4.14787978098195e-62	2.54312	IRF8	High	Mic
RAB5A	19.2617	0.639784	4.77965688197715e-58	3.15509	IRF8	High	Mic
GPRC5D-AS1	8.31407	0.595098	1.79283369878183e-48	2.31805	IRF8	High	Mic
GPC5-AS1	8.92275	0.592268	6.45033190479855e-48	2.52655	IRF8	High	Mic
DNAJC5	10.2987	0.589879	1.88491372261261e-47	2.02309	IRF8	High	Mic
MAP4K4	16.8006	0.588016	4.32174468106019e-47	2.32777	IRF8	High	Mic
TAP1	8.39151	0.554057	6.51735753322567e-41	2.82612	IRF8	High	Mic
CUL1	9.95512	0.528236	1.14159472806181e-36	3.20598	IRF8	High	Mic
HDHD5	9.91541	0.521182	1.42680936691762e-35	3.28545	IRF8	High	Mic
LAP3	15.5559	0.928119	3.67219643732734e-213	2.14487	IRF9	High	Mic
NLRC5	13.1848	0.927841	9.15732952565262e-213	2.3186	IRF9	High	Mic
RNF213	12.2541	0.922761	9.38643121855806e-206	3.74811	IRF9	High	Mic
DAP	8.25068	0.922161	5.8486595972402e-205	2.08513	IRF9	High	Mic
FAM111A	8.02755	0.916091	3.01113322323114e-197	2.24495	IRF9	High	Mic
PATL2	8.74559	0.910306	1.97546176076285e-190	2.65944	IRF9	High	Mic
TNFRSF10B	12.9884	0.909053	5.1175217146757e-189	2.06482	IRF9	High	Mic
GAA	12.8909	0.901571	5.52812444673753e-181	3.20232	IRF9	High	Mic
HLA-C	7.49107	0.897915	2.72348447967036e-177	2.08513	IRF9	High	Mic
HLA-B	13.9231	0.892328	6.62524621025973e-172	2.27178	IRF9	High	Mic
APOBEC3G	15.0254	0.880257	3.22951679222088e-161	2.40712	IRF9	High	Mic
CHD1	9.34162	0.858036	2.65444857027373e-144	2.24495	IRF9	High	Mic
SOAT1	10.5617	0.857969	2.95298300748307e-144	3.20232	IRF9	High	Mic
ITM2B	12.4185	0.852397	1.81829757823622e-140	2.3186	IRF9	High	Mic
HERPUD1	15.9414	0.851931	3.71394570092999e-140	2.70816	IRF9	High	Mic
TNFAIP3	13.5837	0.845291	7.54641527470464e-136	2.70816	IRF9	High	Mic
EPSTI1	12.1379	0.844186	3.75610607754063e-135	3.4401	IRF9	High	Mic
NCMAP	18.5078	0.829616	1.95436090684711e-126	3.20232	IRF9	High	Mic
HIST1H2BH	13.706	0.823929	2.94643086548362e-123	2.27178	IRF9	High	Mic
MBNL1	6.35074	0.823653	4.1793301157866e-123	2.24495	IRF9	High	Mic
SUMO4	17.7472	0.823183	7.56034434066136e-123	2.03305	IRF9	High	Mic
P2RY13	15.7982	0.823014	9.3441950610458e-123	2.23505	IRF9	High	Mic
LPAR6	19.3693	0.822419	1.9698834751963e-122	2.50113	IRF9	High	Mic
RPS25	7.82047	0.820204	3.09984400052036e-121	2.24495	IRF9	High	Mic
STX11	14.0619	0.818679	2.01710180313185e-120	2.27178	IRF9	High	Mic
RCSD1	16.1286	0.808842	2.37920534066509e-115	2.23505	IRF9	High	Mic
DDX60	8.95152	0.806156	5.13211312154404e-114	2.14487	IRF9	High	Mic
ARHGAP27	12.5615	0.797876	4.92900568773585e-110	2.40712	IRF9	High	Mic
STX7	8.00457	0.787584	2.45985973442567e-105	2.43276	IRF9	High	Mic
ERICH1	8.69334	0.775523	3.73944851488633e-100	2.08513	IRF9	High	Mic
SF3B5	6.23817	0.75982	7.134538805207e-94	2.518	IRF9	High	Mic
RPS3A	8.15658	0.744423	3.63057866890364e-88	2.60736	IRF9	High	Mic
DNAJC15	11.4966	0.742119	2.39418024426494e-87	3.4401	IRF9	High	Mic
FMNL1	11.4428	0.728971	7.78284862593276e-83	2.50113	IRF9	High	Mic
HIST1H1D	16.068	0.716673	7.52869117637198e-79	2.70816	IRF9	High	Mic
MIS18BP1	7.01729	0.711382	3.36795748242216e-77	2.14487	IRF9	High	Mic
ZC3H12D	14.3578	0.709593	1.19274262645256e-76	2.23505	IRF9	High	Mic
ST8SIA4	14.4686	0.684218	2.77783991907106e-69	2.27178	IRF9	High	Mic
EEF1AKNMT	6.82981	0.68138	1.66335857875743e-68	3.4401	IRF9	High	Mic
CREG1	16.3974	0.678146	1.24790310526982e-67	3.03093	IRF9	High	Mic
PLAGL1	5.64134	0.636539	2.67817630410511e-57	2.65944	IRF9	High	Mic
ARPC2	13.5396	0.628035	2.23028494462553e-55	2.23505	IRF9	High	Mic
MAP4K4	8.75827	0.618527	2.66786325257548e-53	2.50113	IRF9	High	Mic
TAP1	6.78746	0.586953	6.9214388753822e-47	2.94406	IRF9	High	Mic
CUL1	6.91748	0.506555	2.22958423617981e-33	3.32555	IRF9	High	Mic
HDHD5	7.01954	0.50574	2.9338088472373e-33	2.24495	IRF9	High	Mic
LNX1	52.1458	0.924754	1.91245971917348e-208	3.2878	JUND	High	Ext
C1QL3	50.8101	0.893127	1.16887461816997e-172	2.19166	JUND	High	Ext
OPN3	42.6123	0.892993	1.56684913895593e-172	3.2878	JUND	High	Ext
LZTFL1	30.2677	0.892243	7.96018090943419e-172	2.78348	JUND	High	Ext
MINDY3	31.8127	0.881682	2.04222241808546e-162	2.4022	JUND	High	Ext
HTT	41.2587	0.878773	5.51858110436078e-160	2.36886	JUND	High	Ext
CAMK2N1	36.0127	0.878766	5.59318597616968e-160	2.09528	JUND	High	Ext
LAMB1	41.9948	0.877277	9.30015221985613e-159	2.6475	JUND	High	Ext
YWHAZ	38.4131	0.875474	2.64507993689917e-157	2.19182	JUND	High	Ext
B9D1	39.8291	0.873335	1.31432661673805e-155	3.82942	JUND	High	Ext
IQCJ	23.9441	0.870972	9.04298405836309e-154	3.4588	JUND	High	Ext
EPHX4	20.7762	0.870923	9.85652783202412e-154	2.39061	JUND	High	Ext
ADAMTS8	26.5651	0.867637	3.12038481401298e-151	2.0046	JUND	High	Ext
CREG2	48.1267	0.861254	1.43857948898596e-146	3.03433	JUND	High	Ext
BHLHE40-AS1	39.9989	0.859304	3.44479078259212e-145	2.56562	JUND	High	Ext
DSTN	26.9727	0.843659	8.04252624968651e-135	2.52137	JUND	High	Ext
SLC25A21	26.0578	0.841577	1.58146562550282e-133	2.77463	JUND	High	Ext
CFAP73	24.0926	0.836958	1.0164898306943e-130	3.26597	JUND	High	Ext
CRHR1	52.8399	0.833604	9.74644056435257e-129	4.94344	JUND	High	Ext
ZMIZ1-AS1	29.8674	0.830079	1.0649292186275e-126	2.19166	JUND	High	Ext
FBXO33	27.7977	0.823465	5.29770413408931e-123	2.13244	JUND	High	Ext
WDR64	29.7012	0.823228	7.13756743932966e-123	3.26597	JUND	High	Ext
IQCJ-SCHIP1	19.1559	0.81726	1.13549629066345e-119	2.53869	JUND	High	Ext
CHML	43.3419	0.808851	2.35722899725153e-115	3.66691	JUND	High	Ext
MAFK	21.0334	0.792451	1.59470761975139e-107	2.39061	JUND	High	Ext
MICAL2	76.4731	0.786758	5.70951164661461e-105	4.37194	JUND	High	Ext
SYT13	59.7137	0.783474	1.56427829522276e-103	2.24115	JUND	High	Ext
TUBA8	46.2202	0.780187	4.0570507232288e-102	2.56323	JUND	High	Ext
LINC00276	33.5349	0.775353	4.40193820739877e-100	2.25583	JUND	High	Ext
RCAN2	19.3881	0.77055	4.13120220626759e-98	2.25583	JUND	High	Ext
ICMT	33.2981	0.760884	2.77735362865599e-94	2.78325	JUND	High	Ext
C7orf50	34.2702	0.758926	1.57203946495897e-93	2.63876	JUND	High	Ext
RUNDC3A	56.323	0.757234	6.94181240582677e-93	2.52137	JUND	High	Ext
KCNA4	47.2149	0.757049	8.15729857535663e-93	3.17117	JUND	High	Ext
ATP2B1-AS1	24.5371	0.744524	3.34178014706656e-88	2.6475	JUND	High	Ext
TG	25.4636	0.741875	2.92003676119409e-87	2.78348	JUND	High	Ext
KCNMA1	29.239	0.735567	4.58309129457087e-85	2.27807	JUND	High	Ext
PEA15	18.3352	0.732553	4.87515032457741e-84	2.39061	JUND	High	Ext
VPS37B	27.3751	0.726491	5.15582987739065e-82	2.39061	JUND	High	Ext
KDM5B	25.612	0.724759	1.90737819339183e-81	2.39061	JUND	High	Ext
IPO5	28.3081	0.722538	1.00556767363937e-80	2.88522	JUND	High	Ext
DSP	14.5842	0.720758	3.77356378945514e-80	2.77463	JUND	High	Ext
LINC01616	38.1387	0.711289	3.59697065267116e-77	2.52137	JUND	High	Ext
ARNTL2	21.3105	0.709048	1.75022004071751e-76	2.19166	JUND	High	Ext
PEX26	32.9104	0.707775	4.27066700704742e-76	2.29432	JUND	High	Ext
HNRNPLL	22.4575	0.695578	1.73778074460969e-72	2.40396	JUND	High	Ext
PRAG1	37.28	0.694959	2.62131700893507e-72	2.78348	JUND	High	Ext
DNAAF5	48.3064	0.688289	2.0539107664713e-70	2.74739	JUND	High	Ext
APBA2	31.9522	0.688223	2.14316948780777e-70	2.56562	JUND	High	Ext
C9orf16	58.9506	0.672795	3.3078961581778e-66	3.08749	JUND	High	Ext
SNX31	20.7356	0.660939	3.70544320190219e-63	2.13244	JUND	High	Ext
SLC6A20	19.922	0.651014	1.0412058044515e-60	3.91249	JUND	High	Ext
FGFR1OP	14.6521	0.649977	1.85403567486316e-60	2.53869	JUND	High	Ext
PTPRR	19.2668	0.64767	6.63590851667335e-60	2.39061	JUND	High	Ext
ATF7IP2	23.5708	0.643793	5.51764951065355e-59	2.53869	JUND	High	Ext
PTPRN	36.0678	0.642519	1.09942587131958e-58	2.46111	JUND	High	Ext
ARPC1A	16.2467	0.629603	9.96660217075553e-56	2.50391	JUND	High	Ext
TMEM26	16.5044	0.624516	1.33567469843609e-54	3.006	JUND	High	Ext
SLFN5	15.9592	0.620335	1.08777799062318e-53	2.77463	JUND	High	Ext
TMEM26-AS1	15.7434	0.619998	1.2864142138644e-53	2.73212	JUND	High	Ext
SNPH	25.9101	0.619761	1.44733178278671e-53	2.73393	JUND	High	Ext
LINC-PINT	14.9361	0.615793	1.02453425408162e-52	2.40396	JUND	High	Ext
RNF115	17.1988	0.60108	1.14530164744251e-49	3.35108	JUND	High	Ext
PRKAR1B	43.9266	0.60019	1.7302166508447e-49	2.14472	JUND	High	Ext
MICAL3	15.4272	0.595172	1.7337049843959e-48	2.01892	JUND	High	Ext
CALN1	16.798	0.588407	3.63261666191336e-47	2.39061	JUND	High	Ext
PSMD9	27.1062	0.587536	5.34699814622539e-47	2.50391	JUND	High	Ext
CAMTA2	16.149	0.575108	1.17283789436282e-44	2.50391	JUND	High	Ext
RGS6	29.5883	0.568248	2.08520485284849e-43	3.09083	JUND	High	Ext
LNX1-AS1	18.1753	0.56802	2.29240508766279e-43	2.13965	JUND	High	Ext
RNF112	21.38	0.555073	4.35977399993185e-41	3.32609	JUND	High	Ext
AP3B2	24.1431	0.551109	2.07679535803069e-40	2.29432	JUND	High	Ext
PKM	18.1292	0.538499	2.60069323141731e-38	2.30904	JUND	High	Ext
DNAH5	17.1042	0.519111	2.96013131870826e-35	2.4022	JUND	High	Ext
LINC00683	17.411	0.516465	7.47335020908695e-35	3.35108	JUND	High	Ext
ARHGAP44	13.9809	0.513518	2.07576927939937e-34	2.39061	JUND	High	Ext
PTK2	17.6373	0.513128	2.37394928854568e-34	2.88522	JUND	High	Ext
RASAL1	21.806	0.505688	2.98565403253125e-33	3.32609	JUND	High	Ext
RALYL	18.7629	0.894765	3.21792774827791e-174	3.09419	NEUROD2	High	Ext
SH3GL2	27.4639	0.894241	1.02174037241683e-173	2.4649	NEUROD2	High	Ext
CFAP52	29.3836	0.883278	8.87263952564864e-164	2.50643	NEUROD2	High	Ext
KCNV1	33.6786	0.871078	7.48195548319354e-154	2.73523	NEUROD2	High	Ext
DLGAP1-AS4	32.7179	0.861512	9.41914178675009e-147	3.32419	NEUROD2	High	Ext
PAIP1	13.0686	0.824042	2.55631164123575e-123	4.10434	NEUROD2	High	Ext
LNX1	24.7571	0.814323	3.87358322279131e-118	2.09393	NEUROD2	High	Ext
STX1B	12.9724	0.803503	1.01685982030429e-112	2.42112	NEUROD2	High	Ext
PRICKLE1	12.6367	0.786828	5.31620522240949e-105	2.55601	NEUROD2	High	Ext
RFTN1	45.7915	0.786736	5.83684881371454e-105	3.26513	NEUROD2	High	Ext
CFAP221	12.4015	0.784828	4.02713026331492e-104	2.55601	NEUROD2	High	Ext
GSG1L2	26.16	0.779214	1.05265168880637e-101	2.24757	NEUROD2	High	Ext
LINC01361	12.2884	0.775426	4.10277456800969e-100	2.17358	NEUROD2	High	Ext
DLGAP1-AS3	22.7534	0.770407	4.7192031651577e-98	2.72999	NEUROD2	High	Ext
DSN1	10.3613	0.766217	2.26416812647108e-96	2.43541	NEUROD2	High	Ext
PRSS53	24.0216	0.747955	1.93690475769865e-89	2.24526	NEUROD2	High	Ext
OLFM3	17.504	0.745966	1.01531790753477e-88	3.20105	NEUROD2	High	Ext
DNA2	15.7126	0.735322	5.55975730432855e-85	3.66761	NEUROD2	High	Ext
TMEM183A	17.1804	0.727646	2.14332562675644e-82	2.30081	NEUROD2	High	Ext
PHACTR1	19.8347	0.720085	6.20112755396838e-80	2.99792	NEUROD2	High	Ext
USP43	20.7992	0.714899	2.71843157441704e-78	2.50643	NEUROD2	High	Ext
CDC40	31.6713	0.700453	6.59142318774809e-74	2.04769	NEUROD2	High	Ext
PKIG	22.5382	0.691024	3.48348495042073e-71	2.42112	NEUROD2	High	Ext
GTF3C1	19.9929	0.685996	8.95127006745438e-70	2.79416	NEUROD2	High	Ext
CIT	20.6989	0.671903	5.67600012149639e-66	3.83581	NEUROD2	High	Ext
TBCE	11.8187	0.631201	4.36829221276559e-56	2.06905	NEUROD2	High	Ext
ERICH3	30.7253	0.623769	1.94727217860372e-54	3.20105	NEUROD2	High	Ext
LINC01793	16.5986	0.623252	2.52687328575856e-54	5.36382	NEUROD2	High	Ext
GALNT17	18.4773	0.615248	1.33755552299925e-52	2.19242	NEUROD2	High	Ext
DDX19A	9.7402	0.566748	3.8791604854211e-43	2.60687	NEUROD2	High	Ext
ADAMTS3	23.6662	0.558386	1.16360977301379e-41	2.19242	NEUROD2	High	Ext
OPRM1	12.3262	0.532612	2.31292014553361e-37	3.66761	NEUROD2	High	Ext
ADGRF5	11.6727	0.529229	7.96228798203528e-37	2.82408	NEUROD2	High	Ext
CHRM3	13.2633	0.52351	6.24018027725152e-36	2.19242	NEUROD2	High	Ext
RALYL	19.4956	0.900059	1.93579463597482e-179	2.78895	NEUROD6	High	Ext
SH3GL2	28.9696	0.895718	3.88931845511528e-175	2.09379	NEUROD6	High	Ext
PPFIA4	31.9187	0.882998	1.54298834972574e-163	2.21264	NEUROD6	High	Ext
KCNV1	37.1292	0.870185	3.63589541087225e-153	3.28447	NEUROD6	High	Ext
DLGAP1-AS4	46.3284	0.85153	6.85328069312552e-140	3.5693	NEUROD6	High	Ext
WASF1	34.9418	0.843601	8.74844022023052e-135	2.27866	NEUROD6	High	Ext
PDP1	15.7444	0.839533	2.83480750227711e-132	2.33193	NEUROD6	High	Ext
VSNL1	25.5012	0.830123	1.00491513147997e-126	2.09379	NEUROD6	High	Ext
STX1B	16.3732	0.827854	1.94205802706669e-125	3.19048	NEUROD6	High	Ext
RTKN2	13.8065	0.824932	8.26232356245235e-124	2.94974	NEUROD6	High	Ext
TMEM67	14.1435	0.824686	1.13012982449696e-123	2.06691	NEUROD6	High	Ext
PAIP1	9.61971	0.821942	3.57267872460695e-122	2.22842	NEUROD6	High	Ext
MELTF	30.373	0.810951	2.06249407214724e-116	2.21789	NEUROD6	High	Ext
LINC02613	10.1894	0.792986	9.09056523542212e-108	2.49322	NEUROD6	High	Ext
SPEF2	11.8018	0.788634	8.38456622994916e-106	2.90963	NEUROD6	High	Ext
RFTN1	57.9451	0.777499	5.58038541495525e-101	3.34662	NEUROD6	High	Ext
MIS18A	13.6726	0.776044	2.27028626709875e-100	3.79044	NEUROD6	High	Ext
SLC17A6	21.8473	0.773895	1.76781017767036e-99	3.97193	NEUROD6	High	Ext
DLGAP1-AS3	31.5167	0.768305	3.32498658893777e-97	3.05308	NEUROD6	High	Ext
CFAP221	12.9675	0.766991	1.11365819556703e-96	2.25934	NEUROD6	High	Ext
PRSS53	29.8376	0.76478	8.3773339281644e-96	2.94974	NEUROD6	High	Ext
DSN1	10.8355	0.756992	8.57450141292864e-93	2.22842	NEUROD6	High	Ext
DNA2	15.141	0.749084	7.51416289752253e-90	3.35661	NEUROD6	High	Ext
TMEM183A	17.5044	0.747385	3.11866071954707e-89	2.0098	NEUROD6	High	Ext
LINC00710	18.7383	0.745355	1.68410871637223e-88	2.21789	NEUROD6	High	Ext
LINC01950	11.0622	0.733779	1.87092901347424e-84	2.3986	NEUROD6	High	Ext
GTF3C1	23.1088	0.709337	1.42802503275571e-76	2.49322	NEUROD6	High	Ext
CDC40	35.0848	0.699161	1.57917953368148e-73	2.4202	NEUROD6	High	Ext
HNRNPLL	17.689	0.698658	2.21661123223213e-73	2.06691	NEUROD6	High	Ext
PKIG	23.8054	0.698232	2.95055675733528e-73	2.12728	NEUROD6	High	Ext
CIT	17.6885	0.68523	1.45894663245697e-69	2.40428	NEUROD6	High	Ext
LINC01011	10.0264	0.670938	1.01557344705509e-65	2.0882	NEUROD6	High	Ext
ERICH3	29.6864	0.665357	2.81333628398818e-64	2.80891	NEUROD6	High	Ext
ADGRB2	14.0086	0.652079	5.74635473423313e-61	2.09379	NEUROD6	High	Ext
IKZF3	10.1295	0.645128	2.66876757818169e-59	3.03892	NEUROD6	High	Ext
LINC01793	16.7739	0.641426	1.98236146799628e-58	4.9456	NEUROD6	High	Ext
TRIM72	22.7035	0.641242	2.18794815272957e-58	3.10577	NEUROD6	High	Ext
MIR3976HG	14.9282	0.636253	3.11485175534031e-57	2.0882	NEUROD6	High	Ext
DDX19A	9.67035	0.600155	1.75877630414177e-49	2.3986	NEUROD6	High	Ext
KLRD1	10.8381	0.590797	1.25007347894632e-47	3.3808	NEUROD6	High	Ext
PTK2B	13.8943	0.579244	2.00130067880668e-45	2.35516	NEUROD6	High	Ext
SLC39A8	13.0472	0.563755	1.3251307578886e-42	3.35661	NEUROD6	High	Ext
OPRM1	12.29	0.546492	1.24684792586455e-39	3.35661	NEUROD6	High	Ext
KAT8	12.5512	0.536244	6.03595905761601e-38	2.22842	NEUROD6	High	Ext
ADGRF5	11.544	0.520788	1.63995986429257e-35	2.61453	NEUROD6	High	Ext
CELF1	13.608	0.50553	3.14825555913519e-33	2.0098	NEUROD6	High	Ext
PPARA	36.5076	0.854851	4.08899116246534e-142	2.27188	NFIA	High	Ast_OPC
RGS3	32.8381	0.805172	1.5614272602155e-113	2.06013	NFIA	High	Ast_OPC
EPHX1	15.531	0.803828	7.07136034496802e-113	2.52154	NFIA	High	Ast_OPC
ATP1B2	28.0107	0.790791	9.02541059892938e-107	2.44296	NFIA	High	Ast_OPC
PLCB3	17.4477	0.789851	2.3907670238874e-106	2.25961	NFIA	High	Ast_OPC
SLC35C2	17.8252	0.78763	2.34677103458229e-105	2.09579	NFIA	High	Ast_OPC
RHOB	25.1455	0.78287	2.85921321596771e-103	2.35587	NFIA	High	Ast_OPC
PC	20.482	0.782438	4.39475248648536e-103	3.02185	NFIA	High	Ast_OPC
CCDC9B	22.3549	0.771102	2.46387959108796e-98	2.67151	NFIA	High	Ast_OPC
CIB1	21.5171	0.770469	4.45476342909145e-98	2.0375	NFIA	High	Ast_OPC
SEMA4B	26.0374	0.768567	2.60936962279245e-97	3.42825	NFIA	High	Ast_OPC
MTX1	21.913	0.760865	2.82521490611884e-94	3.02185	NFIA	High	Ast_OPC
CYP4F11	34.3467	0.760254	4.85468781753773e-94	3.12057	NFIA	High	Ast_OPC
SHC1	57.9241	0.757048	8.16637182600697e-93	3.02701	NFIA	High	Ast_OPC
ZBTB7B	39.6551	0.751125	1.34088671240042e-90	2.92697	NFIA	High	Ast_OPC
PBXIP1	66.4408	0.745616	1.35708864098814e-88	3.31478	NFIA	High	Ast_OPC
HES5	36.7189	0.743497	7.76227718717009e-88	2.67151	NFIA	High	Ast_OPC
IL7	11.9188	0.733112	3.15290326324775e-84	2.29411	NFIA	High	Ast_OPC
RGMA	27.0694	0.72721	2.98486212881407e-82	2.04226	NFIA	High	Ast_OPC
WNT7B	33.3618	0.717791	3.33518465193001e-79	2.06013	NFIA	High	Ast_OPC
FAM181A-AS1	41.6425	0.704704	3.60209629629751e-75	2.84483	NFIA	High	Ast_OPC
FAM181A	41.812	0.699444	1.30468008322918e-73	2.84483	NFIA	High	Ast_OPC
SLC2A4	21.3888	0.699155	1.58586899504122e-73	2.24687	NFIA	High	Ast_OPC
MUC1	37.5554	0.68754	3.32684350387678e-70	2.0375	NFIA	High	Ast_OPC
AAMDC	24.0225	0.682055	1.08843616420875e-68	2.48883	NFIA	High	Ast_OPC
HDHD3	27.3543	0.676228	4.07038257380148e-67	3.42825	NFIA	High	Ast_OPC
PMF1	26.5378	0.664084	5.94022830155144e-64	2.06013	NFIA	High	Ast_OPC
TMEM79	29.1504	0.661069	3.43729481688175e-63	2.24009	NFIA	High	Ast_OPC
FAM151A	21.5994	0.643373	6.92827221323184e-59	2.38487	NFIA	High	Ast_OPC
ACOT11	18.5859	0.638534	9.30821810774603e-58	2.80193	NFIA	High	Ast_OPC
RUSC1-AS1	14.6891	0.634691	7.08549595269141e-57	2.84483	NFIA	High	Ast_OPC
KHDC4	18.7076	0.626863	4.05691996311722e-55	2.61478	NFIA	High	Ast_OPC
YTHDF1	11.8915	0.625165	9.61907594578667e-55	2.21147	NFIA	High	Ast_OPC
SMG5	33.3184	0.619432	1.70366526480206e-53	2.44407	NFIA	High	Ast_OPC
LMNA	47.1801	0.608012	4.38835978913583e-51	2.5368	NFIA	High	Ast_OPC
CYP7B1	15.002	0.598018	4.71445835233141e-49	2.09579	NFIA	High	Ast_OPC
MIRLET7BHG	35.111	0.5918	7.96422679829994e-48	2.11997	NFIA	High	Ast_OPC
BMP1	18.5162	0.577216	4.77824357769871e-45	2.38487	NFIA	High	Ast_OPC
TSTD2	20.8576	0.544832	2.35849081145112e-39	3.46319	NFIA	High	Ast_OPC
PADI2	20.1328	0.532052	2.84098182158105e-37	2.44407	NFIA	High	Ast_OPC
NACC2	21.9653	0.865696	8.65581321499494e-150	2.37488	NFIB	High	Ast_OPC
FGF11	29.9641	0.840433	8.0025290045977e-133	2.43898	NFIB	High	Ast_OPC
EPHX1	15.5801	0.804863	2.21243568784976e-113	2.44539	NFIB	High	Ast_OPC
ATP1B2	31.3126	0.795882	4.20716415993525e-109	3.10953	NFIB	High	Ast_OPC
PC	20.6986	0.781103	1.64739557924492e-102	2.94245	NFIB	High	Ast_OPC
SLC35C2	18.1331	0.779626	7.03592331819047e-102	2.03449	NFIB	High	Ast_OPC
SEMA4B	28.6028	0.776838	1.05634100406617e-100	3.33393	NFIB	High	Ast_OPC
PLCB3	17.4073	0.775039	5.9373727213329e-100	2.18562	NFIB	High	Ast_OPC
CHRNB1	23.3109	0.767623	6.235751007798e-97	2.15576	NFIB	High	Ast_OPC
CYP4F11	34.083	0.766189	2.32225131234718e-96	3.05404	NFIB	High	Ast_OPC
MTX1	22.164	0.764722	8.82804445067097e-96	2.94245	NFIB	High	Ast_OPC
SHC1	55.9184	0.761207	2.08341227697202e-94	3.56671	NFIB	High	Ast_OPC
PBXIP1	64.0686	0.752662	3.61739147875425e-91	3.83729	NFIB	High	Ast_OPC
HES5	36.0946	0.750276	2.75059545021834e-90	2.59429	NFIB	High	Ast_OPC
CCDC9B	22.3335	0.74855	1.17682730830143e-89	2.59429	NFIB	High	Ast_OPC
RGMA	31.2426	0.741014	5.87208692546427e-87	2.53915	NFIB	High	Ast_OPC
ZBTB7B	33.586	0.73862	4.03601192953327e-86	2.1774	NFIB	High	Ast_OPC
PAPLN	32.067	0.738124	6.00509817213651e-86	2.18454	NFIB	High	Ast_OPC
IL7	11.635	0.73283	3.92805755544918e-84	2.25924	NFIB	High	Ast_OPC
SLC2A4	22.198	0.707705	4.4851413234639e-76	3.14916	NFIB	High	Ast_OPC
ACADVL	19.1098	0.701872	2.512500718531e-74	2.44539	NFIB	High	Ast_OPC
KCNN3	43.0836	0.697373	5.24916477919635e-73	2.45526	NFIB	High	Ast_OPC
HDHD3	27.3298	0.683678	3.91043608676571e-69	3.33393	NFIB	High	Ast_OPC
AAMDC	21.4792	0.661208	3.17132817100297e-63	2.43853	NFIB	High	Ast_OPC
FAM151A	19.236	0.656831	3.92450207424765e-62	2.30981	NFIB	High	Ast_OPC
ACOT11	16.8942	0.654038	1.9117790828833e-61	2.71209	NFIB	High	Ast_OPC
CSNK1E	17.1614	0.628678	1.60325760319487e-55	2.0713	NFIB	High	Ast_OPC
RUSC1-AS1	15.1016	0.6248	1.15701516579416e-54	2.77936	NFIB	High	Ast_OPC
YTHDF1	11.714	0.604403	2.42198997813481e-50	2.16216	NFIB	High	Ast_OPC
KHDC4	18.3989	0.601736	8.43579604983836e-50	2.55036	NFIB	High	Ast_OPC
CYP7B1	15.3066	0.588803	3.04605943592106e-47	2.03449	NFIB	High	Ast_OPC
DHRS3	26.3962	0.578423	2.8490632613383e-45	2.43898	NFIB	High	Ast_OPC
TSTD2	18.4771	0.519413	2.66241430417538e-35	2.16216	NFIB	High	Ast_OPC
PADI2	16.4865	0.500233	1.83738323000407e-32	2.34736	NFIB	High	Ast_OPC
CUTA	16.1524	0.731123	1.48047711404245e-83	4.6592	NFYA	High	Ast_OPC
UQCC3	18.3247	0.728911	8.14612825399129e-83	3.0811	NFYA	High	Ast_OPC
CBX5	13.0977	0.72395	3.49827992351997e-81	2.4023	NFYA	High	Ast_OPC
HIST1H4C	8.2873	0.718608	1.83515967652258e-79	2.62857	NFYA	High	Ast_OPC
C4orf48	8.91981	0.716338	9.60296630255675e-79	2.4023	NFYA	High	Ast_OPC
C6orf47	14.0969	0.711398	3.33014605743369e-77	2.4023	NFYA	High	Ast_OPC
POLR2G	19.4978	0.707142	6.64191612602509e-76	3.19333	NFYA	High	Ast_OPC
TMEM50B	14.5626	0.705511	2.06238594760142e-75	2.21491	NFYA	High	Ast_OPC
SPPL3	22.3092	0.705072	2.79234584156255e-75	2.62106	NFYA	High	Ast_OPC
HIGD1C	16.2904	0.703673	7.32475892954863e-75	2.95776	NFYA	High	Ast_OPC
BAG6	26.8239	0.701893	2.47647422962964e-74	2.12654	NFYA	High	Ast_OPC
TRIM62	13.297	0.699184	1.55532909619984e-73	2.03715	NFYA	High	Ast_OPC
KRBA2	11.1762	0.695527	1.79781264803831e-72	2.05549	NFYA	High	Ast_OPC
TUBA1A	22.1268	0.69204	1.79426711881342e-71	2.66105	NFYA	High	Ast_OPC
COPZ1	12.5846	0.680466	2.94697651119695e-68	2.4023	NFYA	High	Ast_OPC
HIST1H1E	10.8074	0.670693	1.17678536603386e-65	4.03211	NFYA	High	Ast_OPC
IRF2BP1	12.6444	0.660033	6.25533324381513e-63	2.2338	NFYA	High	Ast_OPC
GIPR	18.5263	0.659698	7.588409166217e-63	2.12654	NFYA	High	Ast_OPC
LINC01978	28.389	0.655773	7.16192242328654e-62	3.0811	NFYA	High	Ast_OPC
PFDN6	12.4776	0.652338	4.96870195740097e-61	3.69782	NFYA	High	Ast_OPC
VPS52	8.70883	0.651028	1.03313736253165e-60	2.77932	NFYA	High	Ast_OPC
TMEM54	8.18924	0.650605	1.30729262519379e-60	2.4023	NFYA	High	Ast_OPC
HNRNPA1	12.5901	0.649263	2.75327820848426e-60	2.02769	NFYA	High	Ast_OPC
CARHSP1	9.94683	0.645192	2.57784780713108e-59	2.05549	NFYA	High	Ast_OPC
SLC39A7	10.9013	0.64412	4.62152479939721e-59	3.17487	NFYA	High	Ast_OPC
ILKAP	29.4676	0.628587	1.68035713976706e-55	3.43959	NFYA	High	Ast_OPC
ATP5F1D	12.8598	0.621885	5.01920465549937e-54	2.02769	NFYA	High	Ast_OPC
TMEM259	24.5512	0.619906	1.34680922264304e-53	2.27329	NFYA	High	Ast_OPC
KARS	7.63387	0.616008	9.22082248164691e-53	2.21491	NFYA	High	Ast_OPC
LINC02610	17.9959	0.603546	3.62172543939848e-50	2.35077	NFYA	High	Ast_OPC
LSM2	25.4175	0.601011	1.18233150268195e-49	2.2338	NFYA	High	Ast_OPC
GPANK1	12.6282	0.598282	4.17455560025824e-49	2.21491	NFYA	High	Ast_OPC
RANGRF	7.80814	0.59579	1.30759270605288e-48	2.91278	NFYA	High	Ast_OPC
SON	8.8997	0.594612	2.23553159690622e-48	2.12382	NFYA	High	Ast_OPC
PPP1R3F	9.54251	0.587406	5.66378985347799e-47	2.05549	NFYA	High	Ast_OPC
CCZ1	19.3034	0.586228	9.53535677770186e-47	2.47915	NFYA	High	Ast_OPC
SYMPK	12.1413	0.573935	1.92757502524646e-44	2.2338	NFYA	High	Ast_OPC
TMEM170A	13.1766	0.560863	4.29310223300453e-42	2.36136	NFYA	High	Ast_OPC
CCNG1	10.7137	0.556562	2.41236628808039e-41	2.12382	NFYA	High	Ast_OPC
SMARCA5	10.8377	0.551027	2.14506185505014e-40	3.03071	NFYA	High	Ast_OPC
ACIN1	13.4381	0.540297	1.32287050722038e-38	2.05549	NFYA	High	Ast_OPC
MAP4	11.3154	0.532673	2.26128054877237e-37	2.05549	NFYA	High	Ast_OPC
PSMB9	26.6782	0.531237	3.82892942798877e-37	3.10236	NFYA	High	Ast_OPC
C12orf10	13.6578	0.529192	8.072104967807e-37	2.2338	NFYA	High	Ast_OPC
TMBIM4	9.61418	0.515663	9.87605746864369e-35	2.47915	NFYA	High	Ast_OPC
SLC11A2	10.2358	0.512714	2.73769805148211e-34	2.2338	NFYA	High	Ast_OPC
CUTA	16.509	0.74441	3.6685248379499e-88	2.14092	NFYC	High	Unknow
SLC25A1	13.5989	0.740058	1.27116744418076e-86	2.80596	NFYC	High	Unknow
THUMPD3-AS1	12.9052	0.730334	2.72703992813367e-83	2.35757	NFYC	High	Unknow
STAT5B	13.2676	0.728863	8.45351392037414e-83	2.27848	NFYC	High	Unknow
CBX5	15.0138	0.718073	2.71420194987985e-79	2.13544	NFYC	High	Unknow
ZNF708	11.2512	0.717753	3.43023856538855e-79	3.03888	NFYC	High	Unknow
TMEM50B	17.2868	0.717413	4.39391634031022e-79	3.03888	NFYC	High	Unknow
ISCA2	9.5493	0.716794	6.89805217872963e-79	2.35757	NFYC	High	Unknow
SNAPC5	10.2472	0.712032	2.12169262976881e-77	3.01451	NFYC	High	Unknow
HSD17B1	25.0995	0.707917	3.8676937363385e-76	2.25292	NFYC	High	Unknow
MID1IP1	15.6053	0.705755	1.74158256969374e-75	2.13544	NFYC	High	Unknow
GPR146	29.0061	0.701784	2.66651555347485e-74	3.39338	NFYC	High	Unknow
COPZ1	14.2164	0.69713	6.17693540206473e-73	2.13544	NFYC	High	Unknow
INSIG1	20.055	0.696924	7.08726149570501e-73	2.27848	NFYC	High	Unknow
CENPX	32.9299	0.686045	8.67349271285015e-70	3.07021	NFYC	High	Unknow
SLC25A13	16.7449	0.68186	1.23021484759034e-68	2.43238	NFYC	High	Unknow
LAMTOR2	20.3223	0.679038	7.17588128426459e-68	2.22196	NFYC	High	Unknow
KCNJ2	18.6863	0.675195	7.66985912592861e-67	2.60642	NFYC	High	Unknow
PPP2R3A	12.3616	0.67314	2.68444357504105e-66	2.13544	NFYC	High	Unknow
KCNJ2-AS1	17.7629	0.666876	1.14730249197457e-64	2.80596	NFYC	High	Unknow
SLCO1A2	19.8137	0.665168	3.14410161069855e-64	2.01688	NFYC	High	Unknow
ADGRE5	14.7161	0.656817	3.95455021533191e-62	2.27848	NFYC	High	Unknow
ZNF738	12.0302	0.656442	4.89820477604727e-62	3.31749	NFYC	High	Unknow
MSL2	10.3475	0.647893	5.86904107292609e-60	2.14092	NFYC	High	Unknow
LDLRAP1	14.7632	0.643441	6.67778980527211e-59	2.60642	NFYC	High	Unknow
DHPS	10.6918	0.637913	1.29387707900185e-57	2.63762	NFYC	High	Unknow
ARHGDIA	26.4708	0.628528	1.73239340102083e-55	3.46859	NFYC	High	Unknow
SLC52A2	12.6275	0.617327	4.82199063173326e-53	3.03888	NFYC	High	Unknow
SON	11.7645	0.616372	7.7141013562954e-53	3.59544	NFYC	High	Unknow
LMAN2	14.8134	0.611167	9.68238456165731e-52	2.13544	NFYC	High	Unknow
ZNF20	10.9227	0.609558	2.09674654184116e-51	4.11761	NFYC	High	Unknow
PRKCSH	11.6428	0.604271	2.57709668093704e-50	2.27848	NFYC	High	Unknow
GPS1	24.2108	0.601557	9.17013938833342e-50	3.07021	NFYC	High	Unknow
EIF5	9.72084	0.598857	3.20386645423654e-49	2.14092	NFYC	High	Unknow
CCZ1	21.7839	0.59064	1.34080544984634e-47	3.07021	NFYC	High	Unknow
COASY	11.6274	0.573966	1.90276410233904e-44	2.80596	NFYC	High	Unknow
ZNF44	12.9194	0.56266	2.07079043268888e-42	2.35757	NFYC	High	Unknow
DCXR	10.0372	0.561022	4.02562725170803e-42	2.01688	NFYC	High	Unknow
RING1	12.3297	0.546702	1.14999370610432e-39	2.01688	NFYC	High	Unknow
APOL6	10.5087	0.510559	5.72969463725652e-34	2.63762	NFYC	High	Unknow
ZNF680	8.99405	0.693718	5.9513331805977e-72	2.05373	NR1D2	High	Ast_Inh
TNIK	11.6374	0.581743	6.79129189093576e-46	2.58422	NR1D2	High	Ast_Inh
POU3F2	12.8173	0.572283	3.86735454711334e-44	2.10453	NR1D2	High	Ast_Inh
LINC00472	22.3885	0.533516	1.65793023402794e-37	3.54088	NR1D2	High	Ast_Inh
TRAF3IP2	26.7726	0.522237	9.81511337145741e-36	2.64459	NR1D2	High	Ast_Inh
SLC39A12	14.2254	0.504001	5.25427839131255e-33	2.52998	NR1D2	High	Ast_Inh
FZD3	22.1778	0.736823	1.69258587283967e-85	2.26001	RFX2	High	Ext_Ast
RTL6	25.513	0.685406	1.30429425242868e-69	2.35996	RFX2	High	Ext_Ast
SLC2A1-AS1	13.3206	0.6503	1.54906764145973e-60	2.5557	RFX2	High	Ext_Ast
DBN1	51.3541	0.628679	1.60248206367138e-55	2.23246	RFX2	High	Ext_Ast
CELF5	75.0438	0.61764	4.13270605820047e-53	2.26817	RFX2	High	Ext_Ast
BAIAP3	33.7694	0.593847	3.16196877635585e-48	3.39173	RFX2	High	Ext_Ast
SYBU	55.6538	0.582028	6.00085401710535e-46	2.22787	RFX2	High	Ext_Ast
PLEKHG5	31.1852	0.576832	5.62840345775293e-45	2.03067	RFX2	High	Ext_Ast
CALM3	71.5188	0.571301	5.84200394950931e-44	2.26817	RFX2	High	Ext_Ast
CELF6	42.0473	0.568255	2.07978069090663e-43	2.78479	RFX2	High	Ext_Ast
SSBP4	62.9475	0.560184	5.64616870203155e-42	2.04382	RFX2	High	Ext_Ast
GRIN2B	58.8684	0.557267	1.82049106355874e-41	2.55958	RFX2	High	Ext_Ast
LINC01829	12.7203	0.542796	5.13051378822879e-39	2.26213	RFX2	High	Ext_Ast
PRKAR2B	19.8048	0.534244	1.26735213291487e-37	2.71952	RFX2	High	Ext_Ast
GALNT18	33.4243	0.528473	1.04760357683733e-36	2.62927	RFX2	High	Ext_Ast
ACOT7	57.2445	0.526548	2.10086178672713e-36	2.94874	RFX2	High	Ext_Ast
TNFRSF25	40.9291	0.524741	4.01945178208747e-36	2.2935	RFX2	High	Ext_Ast
PNMA8A	44.1249	0.513597	2.01960268260491e-34	2.16625	RFX2	High	Ext_Ast
DAGLB	37.3372	0.676912	2.67320473674137e-67	2.52597	RUNX1	High	Mic
RAC1	38.2514	0.623736	1.97998292643236e-54	2.34522	RUNX1	High	Mic
SLA	65.5356	0.564973	8.05168620624368e-43	2.37711	RUNX1	High	Mic
DENND1C	51.4303	0.562027	2.67882622954938e-42	2.67041	RUNX1	High	Mic
VAV1	100.788	0.548049	6.834362735927e-40	3.35017	RUNX1	High	Mic
CX3CR1	63.171	0.542581	5.56686282022515e-39	2.05087	RUNX1	High	Mic
GPR183	87.0451	0.539582	1.73179189814774e-38	2.51248	RUNX1	High	Mic
SP100	49.1734	0.537039	4.49056956752412e-38	3.20174	RUNX1	High	Mic
CELF1	26.2939	0.536077	6.42386012903317e-38	2.16018	RUNX1	High	Mic
C3	93.076	0.535272	8.6624557798142e-38	2.71822	RUNX1	High	Mic
AOAH	33.3238	0.532672	2.2625505679933e-37	2.26336	RUNX1	High	Mic
RNASEH2B-AS1	44.3768	0.528309	1.11185121948098e-36	2.06866	RUNX1	High	Mic
UBAC2	50.6098	0.522126	1.02132439547712e-35	2.37711	RUNX1	High	Mic
LINC00320	7.34149	0.935326	4.422199254087e-224	2.31615	SOX13	High	Oli
LINC01010	13.1074	0.928627	6.82022331268804e-214	2.16436	SOX13	High	Oli
ITGA2	18.0439	0.926303	1.37395572518034e-210	3.65	SOX13	High	Oli
PLP1	30.2048	0.916178	2.35573659460025e-197	6.43626	SOX13	High	Oli
PCCB	5.7467	0.915454	1.80082526268769e-196	2.00844	SOX13	High	Oli
WHRN	10.0251	0.914018	9.48904103437374e-195	2.1835	SOX13	High	Oli
EVA1C	13.9834	0.900643	4.9281895683203e-180	2.2478	SOX13	High	Oli
DPH7	7.76452	0.895367	8.46848633056576e-175	2.12776	SOX13	High	Oli
GACAT3	15.2029	0.884533	7.29461195276746e-165	2.01097	SOX13	High	Oli
MAFF	17.3116	0.880232	3.38942371899562e-161	2.05757	SOX13	High	Oli
RBP7	19.7386	0.879198	2.45680650564132e-160	2.63715	SOX13	High	Oli
UBE4B	18.4461	0.868721	4.74052233290872e-152	2.58169	SOX13	High	Oli
TMEM31	24.984	0.855478	1.5321246535716e-142	6.43626	SOX13	High	Oli
MORF4L2-AS1	25.3528	0.850345	4.1472627619188e-139	6.25447	SOX13	High	Oli
PEX1	11.8606	0.843879	5.85490325384834e-135	2.12282	SOX13	High	Oli
ARRDC1-AS1	7.1725	0.838908	6.80093899899283e-132	2.00844	SOX13	High	Oli
ZBTB8A	7.18936	0.824373	1.68160557649108e-123	2.12776	SOX13	High	Oli
TMEM229A	9.22349	0.823997	2.70569917127835e-123	2.31615	SOX13	High	Oli
ZMYND19	6.49555	0.793569	4.91601754428911e-108	2.43871	SOX13	High	Oli
YWHAQ	11.446	0.792314	1.8418188746898e-107	2.64155	SOX13	High	Oli
CPSF3	11.5416	0.76542	4.68416807150936e-96	2.2478	SOX13	High	Oli
TMTC2	9.92756	0.71634	9.59143320692398e-79	2.81809	SOX13	High	Oli
LDLRAD3	9.74517	0.699717	1.08540020262786e-73	2.84759	SOX13	High	Oli
LINC02226	5.79207	0.683442	4.53880531303006e-69	2.95028	SOX13	High	Oli
VAMP5	11.1025	0.678348	1.10098704392113e-67	2.16436	SOX13	High	Oli
GAMT	7.79706	0.64874	3.67850102998252e-60	2.46707	SOX13	High	Oli
LZIC	8.8856	0.623588	2.13361338568858e-54	3.26712	SOX13	High	Oli
RFX3-AS1	6.07244	0.584313	2.21351772051328e-46	2.43871	SOX13	High	Oli
CDK6	6.12724	0.526206	2.37563553462143e-36	2.12282	SOX13	High	Oli
NIPBL	13.3185	0.520757	1.65831555052676e-35	3.3773	SOX13	High	Oli
C19orf25	6.40542	0.512655	2.7934059267921e-34	2.2478	SOX13	High	Oli
KIF2A	6.39505	0.918083	1.03619872323648e-199	2.67141	SOX3	High	Oli
PDE4B	9.88393	0.91718	1.38160474509056e-198	2.84195	SOX3	High	Oli
FEZ1	7.47513	0.904555	4.14704780345506e-184	2.94826	SOX3	High	Oli
DICER1	11.3986	0.902927	2.16746207836314e-182	2.17955	SOX3	High	Oli
HEY2	22.3614	0.901191	1.35849539473511e-180	2.56161	SOX3	High	Oli
ERBIN	10.3733	0.892241	7.99446401279763e-172	2.28829	SOX3	High	Oli
NTM-AS1	21.7192	0.886941	5.55084677987839e-167	2.51913	SOX3	High	Oli
TMEM144	14.4535	0.8793	2.02082264623958e-160	3.55123	SOX3	High	Oli
DCAF17	6.33201	0.87733	8.41135517642186e-159	2.16085	SOX3	High	Oli
LINC01010	14.7894	0.873917	4.57793577041466e-156	2.99338	SOX3	High	Oli
AGMO	10.1489	0.870437	2.33072477753256e-153	2.80306	SOX3	High	Oli
SH3BP4	17.7263	0.869046	2.69122021709761e-152	2.59652	SOX3	High	Oli
LINC01608	6.02359	0.866272	3.2467409636197e-150	2.44065	SOX3	High	Oli
KBTBD3	5.2892	0.864883	3.43340380923251e-149	2.30219	SOX3	High	Oli
MND1	16.2588	0.861466	1.01548374482172e-146	2.40486	SOX3	High	Oli
ANKIB1	6.46875	0.856634	2.47430622772919e-143	2.03608	SOX3	High	Oli
SGK1	14.7952	0.848169	1.08449418706679e-137	2.73499	SOX3	High	Oli
LINC00486	9.28088	0.84789	1.64454666911901e-137	3.49887	SOX3	High	Oli
PCDHB4	4.26418	0.821203	8.9815275304013e-122	2.29799	SOX3	High	Oli
PRKCQ-AS1	17.2089	0.817394	9.64999567683268e-120	2.97149	SOX3	High	Oli
ACAD8	10.151	0.809888	7.09457541046122e-116	2.15549	SOX3	High	Oli
CALD1	6.84665	0.807619	9.70807573095105e-115	2.55116	SOX3	High	Oli
PRKCQ	16.4511	0.805583	9.81664287148434e-114	2.89001	SOX3	High	Oli
CNKSR3	13.8015	0.80318	1.45781256143602e-112	3.05489	SOX3	High	Oli
SPATA13	16.1791	0.799911	5.38705177000825e-111	3.12283	SOX3	High	Oli
B3GAT1	6.37561	0.799664	7.05163635822014e-111	2.24379	SOX3	High	Oli
PKD2L2	6.7141	0.797863	4.99523121909937e-110	2.15549	SOX3	High	Oli
PSME4	8.91994	0.777969	3.53945943671633e-101	3.49887	SOX3	High	Oli
DST	4.62442	0.775267	4.77653433845217e-100	2.80306	SOX3	High	Oli
ARAP2	7.15126	0.774495	9.98897333764273e-100	2.19554	SOX3	High	Oli
NCOA7-AS1	18.6233	0.770824	3.19747529643463e-98	2.92555	SOX3	High	Oli
LINC02293	4.10308	0.738266	5.36029392994101e-86	2.46469	SOX3	High	Oli
DMTF1	5.97126	0.736468	2.2433113574102e-85	2.80306	SOX3	High	Oli
ZBTB20	7.98143	0.733793	1.84951310477952e-84	2.19554	SOX3	High	Oli
ANGEL1	7.32317	0.732016	7.40793978524304e-84	2.24379	SOX3	High	Oli
BUB3	5.79143	0.693397	7.35747144596509e-72	2.03608	SOX3	High	Oli
ANGEL2	5.37427	0.691898	1.96858856237033e-71	2.29799	SOX3	High	Oli
NSMCE2	7.66587	0.667131	9.86244438835508e-65	2.03608	SOX3	High	Oli
SGMS1-AS1	5.15457	0.643309	7.17201981395813e-59	2.24379	SOX3	High	Oli
SOX2	20.0231	0.634333	8.54354324444043e-57	3.05878	SOX3	High	Oli
HINT3	13.9977	0.632085	2.76243493946229e-56	3.05672	SOX3	High	Oli
NCOA7	7.79622	0.632012	2.86896737652631e-56	3.43483	SOX3	High	Oli
POP4	4.84567	0.628097	2.1604145331933e-55	2.16085	SOX3	High	Oli
ERGIC2	5.30745	0.627036	3.7157780083285e-55	2.29799	SOX3	High	Oli
ACYP2	4.08592	0.603974	2.9630687373932e-50	2.65519	SOX3	High	Oli
DUSP10	14.663	0.599278	2.63888979177869e-49	3.37082	SOX3	High	Oli
ZNF775	28.1163	0.932455	1.3833096657502e-219	2.14832	SOX4	High	Oli
LINC01170	57.7773	0.929234	8.97394189948144e-215	3.04245	SOX4	High	Oli
C9orf85	15.3815	0.921515	4.16473707096249e-204	2.05005	SOX4	High	Oli
ABHD17B	18.7224	0.918811	1.25680114571411e-200	2.77089	SOX4	High	Oli
REPIN1	25.1004	0.91625	1.92372071454994e-197	2.14832	SOX4	High	Oli
LINC01877	26.2862	0.913389	5.27159276136089e-194	2.39449	SOX4	High	Oli
BLID	46.7464	0.912825	2.43700290596095e-193	3.12625	SOX4	High	Oli
CNP	38.6221	0.910657	7.85519163428602e-191	2.27882	SOX4	High	Oli
UGT8	38.2238	0.909998	4.41834127865623e-190	2.30657	SOX4	High	Oli
ILKAP	37.4837	0.90661	2.55961984453299e-186	2.39449	SOX4	High	Oli
TMTC4	35.4979	0.902879	2.4361980949333e-182	2.07308	SOX4	High	Oli
RYBP	50.6146	0.892738	2.72574662083511e-172	2.17441	SOX4	High	Oli
ERMN	43.6205	0.889271	4.43688564006347e-169	3.38236	SOX4	High	Oli
WDR61	27.2375	0.884994	2.89494053297929e-165	2.28141	SOX4	High	Oli
DSEL	14.5969	0.884602	6.34983987353845e-165	2.28141	SOX4	High	Oli
TMEM123	31.9893	0.881319	4.13405856885753e-162	2.17091	SOX4	High	Oli
PLP1	38.4046	0.879369	1.77494243921876e-160	2.95693	SOX4	High	Oli
PCA3	36.3536	0.876672	2.87961534051029e-158	2.88461	SOX4	High	Oli
MUSK	26.2889	0.871637	2.76480587913419e-154	2.28141	SOX4	High	Oli
LINC00862	27.5863	0.870003	5.01469242197563e-153	2.42779	SOX4	High	Oli
ZNF281	24.4331	0.866283	3.18682067562681e-150	2.42779	SOX4	High	Oli
PRKCQ	30.9524	0.862072	3.74690057797774e-147	2.67205	SOX4	High	Oli
LINC00877	59.0308	0.861982	4.34380034468242e-147	2.65373	SOX4	High	Oli
LINC00706	38.1266	0.859243	3.80257564050818e-145	2.63964	SOX4	High	Oli
TMEM229A	22.5721	0.857057	1.26454072703888e-143	2.65311	SOX4	High	Oli
MORF4L2-AS1	32.4577	0.857051	1.27727878841695e-143	2.79856	SOX4	High	Oli
PRKCQ-AS1	30.6808	0.846146	2.16027040962436e-136	2.14076	SOX4	High	Oli
FMNL2	28.5517	0.838763	8.3276739392006e-132	2.99799	SOX4	High	Oli
TNKS	28.4527	0.832987	2.23547190197933e-128	3.16441	SOX4	High	Oli
TMEM31	31.3584	0.83198	8.58961030056922e-128	2.95693	SOX4	High	Oli
DAZAP1	30.1764	0.830698	4.70653122467175e-127	2.67205	SOX4	High	Oli
PRRC1	23.9324	0.822922	1.04877588942435e-122	2.05625	SOX4	High	Oli
PRUNE2	29.3314	0.815215	1.33606385852189e-118	2.17091	SOX4	High	Oli
BTBD3	22.6074	0.812743	2.51941181678827e-117	2.42302	SOX4	High	Oli
ZBTB20-AS5	25.8444	0.807277	1.43566857659308e-114	2.27882	SOX4	High	Oli
FAM13C	15.4377	0.801629	8.1469425291895e-112	2.02661	SOX4	High	Oli
LINC00222	22.5647	0.799028	1.41162893987479e-110	3.32135	SOX4	High	Oli
KANK1	38.4578	0.798553	2.36647042457915e-110	2.03106	SOX4	High	Oli
ZFHX4-AS1	44.1873	0.795404	7.0057626106084e-109	2.14384	SOX4	High	Oli
CARHSP1	11.2532	0.793669	4.41973911470227e-108	2.41103	SOX4	High	Oli
LINC02610	18.7103	0.789111	5.12928727278026e-106	2.42779	SOX4	High	Oli
PEX2	16.5055	0.785222	2.70587871104684e-104	2.14832	SOX4	High	Oli
DAPK2	25.6216	0.781425	1.19773482487663e-102	2.06997	SOX4	High	Oli
LINC02240	18.335	0.773535	2.48747850428881e-99	3.32011	SOX4	High	Oli
MIR100HG	19.9167	0.764106	1.54117905596187e-95	2.27882	SOX4	High	Oli
BTD	11.5422	0.755034	4.69872397281226e-92	2.05005	SOX4	High	Oli
ZNF532	15.5406	0.753006	2.69496884011327e-91	3.69701	SOX4	High	Oli
HDDC2	10.9217	0.742085	2.46099216313628e-87	2.21781	SOX4	High	Oli
NSUN7	11.9175	0.736644	1.95087661449865e-85	2.41103	SOX4	High	Oli
BUB3	12.9363	0.735259	5.84069824053051e-85	2.05005	SOX4	High	Oli
FGFR2	33.9291	0.732633	4.58041857421195e-84	2.03106	SOX4	High	Oli
GNE	17.949	0.722427	1.09236349524049e-80	2.14832	SOX4	High	Oli
SRP14	11.9606	0.713286	8.66217487308809e-78	2.63758	SOX4	High	Oli
ZFHX4	40.6386	0.704597	3.87745758558459e-75	2.44799	SOX4	High	Oli
FADS2	25.9282	0.703014	1.15132675396848e-74	3.01965	SOX4	High	Oli
BIRC2	20.0773	0.693224	8.24241260907333e-72	2.28141	SOX4	High	Oli
LINC00870	26.6785	0.671147	8.95321686744588e-66	2.91864	SOX4	High	Oli
SETD7	16.5062	0.658944	1.17102490180153e-62	2.97505	SOX4	High	Oli
ATP5F1D	16.5086	0.65667	4.30073499743788e-62	2.79856	SOX4	High	Oli
COL15A1	15.6485	0.645751	1.89990996048432e-59	2.77089	SOX4	High	Oli
LZIC	13.9571	0.643815	5.45279406145732e-59	2.39449	SOX4	High	Oli
SYNJ2	30.5321	0.633851	1.09996483177186e-56	2.72869	SOX4	High	Oli
SAMHD1	14.7525	0.615922	9.61810733108441e-53	2.02661	SOX4	High	Oli
DHX15	12.9999	0.614076	2.36931491661531e-52	2.21781	SOX4	High	Oli
C19orf25	20.5574	0.578967	2.25474078696442e-45	2.51887	SOX4	High	Oli
UBE2G1	11.7328	0.510676	5.50550344065214e-34	2.41103	SOX4	High	Oli
DHCR7	23.6776	0.949337	1.76584794371184e-249	2.66515	SOX9	High	Oli
RDX	26.9361	0.948694	3.64583425016174e-248	2.23046	SOX9	High	Oli
LINC01170	31.0825	0.947285	2.49971611478522e-245	2.10769	SOX9	High	Oli
KIF2A	11.8029	0.934175	2.9627420532364e-222	2.24056	SOX9	High	Oli
TMEM87A	11.0262	0.930709	6.01119054437762e-217	2.31466	SOX9	High	Oli
UGT8	24.4929	0.925287	3.54238194877319e-209	2.01896	SOX9	High	Oli
ADIPOR2	25.5909	0.922913	5.88866929236491e-206	2.14373	SOX9	High	Oli
ENPP6	27.0671	0.922374	3.05649572452092e-205	3.14876	SOX9	High	Oli
LANCL1-AS1	18.0543	0.91942	2.11506238518606e-201	2.24056	SOX9	High	Oli
CPB1	20.3516	0.910025	4.11516594518792e-190	2.24056	SOX9	High	Oli
ERBIN	26.3892	0.909955	4.93385647608329e-190	2.32009	SOX9	High	Oli
RFFL	19.2148	0.90589	1.54587430658485e-185	2.24056	SOX9	High	Oli
LINC01608	17.7162	0.905611	3.0866448472697e-185	2.01894	SOX9	High	Oli
GATM	19.0247	0.905075	1.15749702681835e-184	2.42097	SOX9	High	Oli
N6AMT1	8.55697	0.899113	1.736453963764e-178	2.12851	SOX9	High	Oli
PLP1	35.2105	0.898861	3.10744777313408e-178	3.87693	SOX9	High	Oli
WHRN	20.9853	0.897728	4.16830074909385e-177	2.42097	SOX9	High	Oli
SH3BP4	55.4233	0.887513	1.71599398879833e-167	4.18433	SOX9	High	Oli
THAP9	24.2955	0.881186	5.35663740216497e-162	3.01151	SOX9	High	Oli
LINC00706	32.6987	0.88098	8.00012406893533e-162	2.45306	SOX9	High	Oli
PHYHIPL	27.8855	0.870772	1.29032332895299e-153	3.19316	SOX9	High	Oli
SCD5	33.8653	0.864201	1.08062306226636e-148	4.35375	SOX9	High	Oli
PRKCQ-AS1	30.6281	0.863372	4.33136792176879e-148	3.10604	SOX9	High	Oli
BTBD3	26.0296	0.854167	1.18412479701476e-141	2.62332	SOX9	High	Oli
PRKCQ	29.1321	0.851368	8.77156716012144e-140	3.01151	SOX9	High	Oli
C1orf198	31.2215	0.847486	2.9908410792088e-137	2.19651	SOX9	High	Oli
MORF4L2-AS1	29.9661	0.844658	1.89594519402284e-135	3.70849	SOX9	High	Oli
TMEM31	29.3943	0.840088	1.30108834282359e-132	3.87693	SOX9	High	Oli
CALD1	11.3122	0.836283	2.56266543019645e-130	2.12489	SOX9	High	Oli
GATAD1	21.5866	0.835306	9.73798621825443e-130	3.55299	SOX9	High	Oli
ATOX1	11.9196	0.832496	4.31737137594457e-128	2.12851	SOX9	High	Oli
NHLRC3	16.0659	0.831508	1.60833291978407e-127	2.76028	SOX9	High	Oli
PEX1	22.1137	0.830938	3.42855753025221e-127	2.32267	SOX9	High	Oli
SPATA5L1	19.5067	0.830905	3.58193058532801e-127	3.27438	SOX9	High	Oli
FAM133B	23.0168	0.827765	2.17762384775856e-125	2.62332	SOX9	High	Oli
AGO3	8.61764	0.827648	2.53550439904436e-125	2.12851	SOX9	High	Oli
ENO4	27.7984	0.827117	5.03103340179534e-125	2.62332	SOX9	High	Oli
SPATA13	34.214	0.817634	7.21002277281039e-120	2.37392	SOX9	High	Oli
PSME4	21.4178	0.808937	2.13348558657002e-115	3.04487	SOX9	High	Oli
TGFB3	13.2234	0.800658	2.37545278925925e-111	2.24056	SOX9	High	Oli
NADSYN1	15.8055	0.800556	2.65697791667962e-111	2.66515	SOX9	High	Oli
LINC02603	10.1911	0.799737	6.51590232980178e-111	2.82263	SOX9	High	Oli
ZNF830	16.5162	0.785275	2.56282150318262e-104	2.24056	SOX9	High	Oli
GPM6B	20.7993	0.783937	9.84752005332578e-104	2.76028	SOX9	High	Oli
CYP51A1	10.3129	0.776055	2.24704462099553e-100	2.53967	SOX9	High	Oli
DST	8.91087	0.773894	1.76897532099311e-99	2.36762	SOX9	High	Oli
LINC02362	16.5986	0.756248	1.64064868227207e-92	2.14373	SOX9	High	Oli
KIF1B	10.2406	0.742169	2.29854948645317e-87	2.01894	SOX9	High	Oli
KIAA0586	11.3421	0.728227	1.37531178714656e-82	2.52415	SOX9	High	Oli
IRF2	18.5414	0.714086	4.88038832808641e-78	2.45014	SOX9	High	Oli
CAPN9	21.5855	0.713904	5.56051632565405e-78	2.52343	SOX9	High	Oli
KANK1	34.5993	0.711931	2.27943035854031e-77	2.10769	SOX9	High	Oli
SYNJ2	20.3774	0.684644	2.11892214140687e-69	2.52343	SOX9	High	Oli
SHTN1	26.9554	0.681094	1.98934797693006e-68	2.97209	SOX9	High	Oli
FGFR2	33.0482	0.65881	1.26499712848694e-62	2.66503	SOX9	High	Oli
MMS22L	9.92682	0.657335	2.94366838478702e-62	2.36762	SOX9	High	Oli
ADCK1	10.9459	0.649655	2.21639539658894e-60	2.36762	SOX9	High	Oli
CDK17	9.04158	0.637986	1.2447165540326e-57	2.06316	SOX9	High	Oli
LZIC	14.7154	0.629753	9.22733663488034e-56	2.42097	SOX9	High	Oli
ASB4	18.0885	0.612128	6.09073282785602e-52	3.41857	SOX9	High	Oli
ACYP2	10.2501	0.59644	9.71822844052312e-49	2.31466	SOX9	High	Oli
SEMA6A-AS1	14.6945	0.584095	2.43521460599511e-46	2.42097	SOX9	High	Oli
SRPK2	10.5342	0.543489	3.93979382072282e-39	2.53967	SOX9	High	Oli
PDK4	17.8489	0.540252	1.34533351267562e-38	2.29316	SOX9	High	Oli
PON3	24.6256	0.53668	5.13246786595257e-38	3.69444	SOX9	High	Oli
NIPBL	17.8845	0.533872	1.4542968861106e-37	2.0831	SOX9	High	Oli
MAX	20.6881	0.504237	4.85545898451187e-33	3.40874	SOX9	High	Oli
SAMSN1	78.4195	0.979325	0	2.36681	SPI1	High	Mic
CLIC1	160.216	0.979059	0	3.84023	SPI1	High	Mic
RUNX1	97.2573	0.978562	0	3.78358	SPI1	High	Mic
DOCK8	99.9807	0.978017	0	2.69368	SPI1	High	Mic
SLCO2B1	89.2455	0.977789	0	2.99495	SPI1	High	Mic
LTC4S	29.8981	0.977701	0	2.19715	SPI1	High	Mic
CASP8	92.3629	0.977465	0	2.8228	SPI1	High	Mic
TBXAS1	77.2683	0.977332	0	4.61872	SPI1	High	Mic
ST6GAL1	73.4632	0.977081	0	2.59609	SPI1	High	Mic
LNCAROD	28.7473	0.976934	0	2.8475	SPI1	High	Mic
FYB1	61.3586	0.9769	0	3.3063	SPI1	High	Mic
FOLR2	62.1983	0.97669	0	2.25186	SPI1	High	Mic
LY86	136.728	0.976444	0	2.40313	SPI1	High	Mic
RNASET2	92.3646	0.97639	0	3.85823	SPI1	High	Mic
P2RY13	98.6944	0.976194	0	4.25695	SPI1	High	Mic
LAPTM5	47.9418	0.976177	0	2.42254	SPI1	High	Mic
HCLS1	32.1634	0.97603	0	2.17979	SPI1	High	Mic
IKZF1	123.487	0.975715	0	2.29219	SPI1	High	Mic
CYBB	33.6307	0.975663	0	2.8475	SPI1	High	Mic
TMEM156	66.6409	0.975605	0	2.82375	SPI1	High	Mic
AIF1	157.937	0.975417	0	3.93852	SPI1	High	Mic
RCSD1	82.6843	0.975384	0	2.92793	SPI1	High	Mic
BLNK	47.8113	0.975328	0	2.66314	SPI1	High	Mic
CCR1	189.201	0.975324	0	3.69094	SPI1	High	Mic
P2RY12	100.643	0.975251	0	4.25695	SPI1	High	Mic
ARRB2	90.6007	0.975227	0	2.91676	SPI1	High	Mic
MS4A6A	122.549	0.975214	0	3.55693	SPI1	High	Mic
NCKAP1L	98.3629	0.975164	0	3.46832	SPI1	High	Mic
LGALS9	63.8932	0.975151	0	3.18048	SPI1	High	Mic
HACD4	61.0459	0.974918	0	4.11931	SPI1	High	Mic
ITGAM	144.864	0.974895	0	3.3555	SPI1	High	Mic
ARHGAP15	37.338	0.974811	0	3.14015	SPI1	High	Mic
RGS10	77.2043	0.974784	0	2.69459	SPI1	High	Mic
LYN	92.0058	0.974643	0	3.9387	SPI1	High	Mic
SP100	125.029	0.974537	0	4.98956	SPI1	High	Mic
MS4A4A	139.227	0.974477	0	3.9387	SPI1	High	Mic
IL18	47.7694	0.974219	0	3.41703	SPI1	High	Mic
TNFRSF1B	114.928	0.973968	1.43427256987714e-319	2.17671	SPI1	High	Mic
LPAR6	115.292	0.973931	1.78797416573489e-319	4.56411	SPI1	High	Mic
MRC1	75.0553	0.973881	2.82990920624949e-319	4.11931	SPI1	High	Mic
MGAT4A	70.7925	0.973847	4.22213678966554e-319	2.13533	SPI1	High	Mic
SIRPD	76.7419	0.97333	4.67167279291276e-317	2.82375	SPI1	High	Mic
CPVL	62.3211	0.973283	7.15310811190315e-317	2.42254	SPI1	High	Mic
CD300LF	160.666	0.973267	8.23630109230502e-317	6.42614	SPI1	High	Mic
CD300A	158.59	0.973174	1.89946062219117e-316	4.57399	SPI1	High	Mic
FCER1G	113.739	0.973156	2.22313616892795e-316	2.75101	SPI1	High	Mic
SRGN	133.063	0.973106	3.4782706639688e-316	2.58352	SPI1	High	Mic
CD86	147.71	0.973066	4.99140979654059e-316	3.74356	SPI1	High	Mic
WDFY4	78.3637	0.973023	7.4003173656659e-316	2.05183	SPI1	High	Mic
SIRPB2	73.2177	0.972917	1.92087730569725e-315	2.82375	SPI1	High	Mic
LINC01480	134.772	0.972746	8.87197621892849e-315	3.84023	SPI1	High	Mic
MYO1F	116.825	0.972641	2.24662241486803e-314	2.59609	SPI1	High	Mic
IL10RA	139.94	0.972449	1.22044210997466e-313	3.93852	SPI1	High	Mic
MS4A7	137.85	0.972009	5.78330316164875e-312	3.9387	SPI1	High	Mic
GPR183	95.0868	0.971974	7.82111547098484e-312	3.13862	SPI1	High	Mic
LAIR1	195.177	0.971872	1.88587393801516e-311	5.87565	SPI1	High	Mic
IL4R	98.8102	0.971799	3.52203945302941e-311	2.01866	SPI1	High	Mic
CYBA	88.3251	0.971732	6.30537656099011e-311	2.47258	SPI1	High	Mic
CD68	51.9022	0.971394	1.13889811299372e-309	2.25569	SPI1	High	Mic
CTSS	51.3783	0.971303	2.45429447452668e-309	2.69368	SPI1	High	Mic
ADCY7	72.688	0.971193	6.25416794353436e-309	2.25186	SPI1	High	Mic
PDGFB	101.39	0.971072	1.73207699071048e-308	2.59609	SPI1	High	Mic
HLA-DPA1	141.96	0.970845	1.16009701516603e-307	3.55693	SPI1	High	Mic
ALOX5AP	98.2741	0.970773	2.10277883369554e-307	3.66076	SPI1	High	Mic
DEF6	114.102	0.970495	2.07450611553202e-306	3.78358	SPI1	High	Mic
SUSD6	80.9303	0.970469	2.56441693461082e-306	3.66076	SPI1	High	Mic
RIN3	175.959	0.97036	6.28905322282822e-306	3.60828	SPI1	High	Mic
TNFSF8	77.4451	0.970158	3.27605612081843e-305	3.14369	SPI1	High	Mic
ITGAX	131.696	0.970105	5.05031529572825e-305	2.71	SPI1	High	Mic
CYTH4	116.444	0.970045	8.22286059772281e-305	3.28342	SPI1	High	Mic
MAP3K8	85.0105	0.969684	1.50332605387902e-303	3.62037	SPI1	High	Mic
LST1	160.271	0.969365	1.91811098633531e-302	4.29652	SPI1	High	Mic
LILRB4	116.19	0.96936	2.00064972808079e-302	2.47258	SPI1	High	Mic
LILRB2	144.634	0.969221	5.99344456113598e-302	5.96297	SPI1	High	Mic
PTGS1	43.4063	0.969198	7.19127649102988e-302	3.20024	SPI1	High	Mic
ARHGDIB	63.7818	0.969065	2.03933919452956e-301	2.69368	SPI1	High	Mic
CEACAM21	132.924	0.96902	2.88913556897729e-301	3.84023	SPI1	High	Mic
TBC1D22A	56.9817	0.968838	1.20171152216122e-300	2.51773	SPI1	High	Mic
CLDN7	153.017	0.968281	8.93821145281095e-299	3.23703	SPI1	High	Mic
AOAH	60.9583	0.968257	1.07453052399373e-298	2.33377	SPI1	High	Mic
SP140L	108.49	0.968197	1.69754040759185e-298	4.11931	SPI1	High	Mic
PGM5	31.7983	0.968154	2.3516885473994e-298	2.17979	SPI1	High	Mic
HAVCR1	51.4106	0.968024	6.35794386206884e-298	2.25569	SPI1	High	Mic
LILRB1	136.553	0.967912	1.48798182330645e-297	4.66369	SPI1	High	Mic
LINC02611	72.632	0.967813	3.14111281384202e-297	2.51773	SPI1	High	Mic
RHOH	70.4354	0.967346	1.04410760971504e-295	2.42254	SPI1	High	Mic
CASS4	37.3264	0.967282	1.67910625849173e-295	2.27799	SPI1	High	Mic
IL21R	100.689	0.967279	1.71619310077806e-295	2.01866	SPI1	High	Mic
CASP10	90.2204	0.967189	3.34113501885805e-295	2.58352	SPI1	High	Mic
HLA-DPB1	143.844	0.966959	1.8286837370606e-294	3.9387	SPI1	High	Mic
SOAT1	45.16	0.966931	2.25100039632487e-294	2.66314	SPI1	High	Mic
ECHDC3	160.361	0.966911	2.60236890216306e-294	6.36335	SPI1	High	Mic
TLR1	91.9197	0.966613	2.31636168461483e-293	2.8057	SPI1	High	Mic
TM6SF1	37.7424	0.966591	2.70834963946877e-293	2.19715	SPI1	High	Mic
IFNGR1	77.5515	0.96653	4.20693177480539e-293	3.38423	SPI1	High	Mic
ATG16L2	107.635	0.966191	4.88700775056221e-292	5.43737	SPI1	High	Mic
HPGDS	33.9614	0.96618	5.2923461076526e-292	2.17979	SPI1	High	Mic
TNFAIP2	46.4165	0.966148	6.60850350110494e-292	2.68598	SPI1	High	Mic
TGFBR1	81.9944	0.965766	1.00699902430931e-290	2.92793	SPI1	High	Mic
OTULINL	110.754	0.965713	1.46246445466447e-290	3.46832	SPI1	High	Mic
LINC01091	66.0603	0.965468	8.22387716934599e-290	2.99495	SPI1	High	Mic
LPAR5	117.624	0.965446	9.60669162879323e-290	2.28685	SPI1	High	Mic
CD4	138.543	0.965076	1.28531307627129e-288	2.74806	SPI1	High	Mic
IFNGR2	114.434	0.964794	9.10974916833461e-288	4.40667	SPI1	High	Mic
MFNG	134.863	0.96475	1.23425169853899e-287	3.93852	SPI1	High	Mic
GPR65	57.2017	0.964598	3.48372047793214e-287	2.25569	SPI1	High	Mic
TLR6	92.5072	0.96451	6.3634737344797e-287	4.19194	SPI1	High	Mic
GRB2	83.1243	0.964022	1.76396351954922e-285	2.47258	SPI1	High	Mic
ADAP2	102.668	0.963472	7.0965557912981e-284	4.98956	SPI1	High	Mic
REL	97.1807	0.963365	1.43991573785157e-283	3.60372	SPI1	High	Mic
SP140	100.892	0.963121	7.25151894599392e-283	4.11931	SPI1	High	Mic
TGFB1	162.367	0.963118	7.3897718754989e-283	2.97542	SPI1	High	Mic
CAB39	68.4072	0.963113	7.60253308810477e-283	3.3063	SPI1	High	Mic
MS4A6E	141.665	0.962771	7.16275579495199e-282	3.9387	SPI1	High	Mic
TMEM236	74.3918	0.962738	8.86697631851832e-282	4.11931	SPI1	High	Mic
TNFAIP3	89.527	0.962647	1.6033964788541e-281	3.71676	SPI1	High	Mic
BHLHE41	82.7185	0.962151	3.9515582054519e-280	2.71897	SPI1	High	Mic
ARHGAP30	132.747	0.961964	1.31094023140253e-279	3.18048	SPI1	High	Mic
RGS1	71.2658	0.961526	2.10901090132171e-278	2.82375	SPI1	High	Mic
RAPGEF1	93.5892	0.961515	2.25750749366866e-278	2.59609	SPI1	High	Mic
MS4A14	136.231	0.960898	1.07570187790755e-276	3.9387	SPI1	High	Mic
LINC02432	47.1964	0.96075	2.70415706140445e-276	2.75101	SPI1	High	Mic
CD93	81.4392	0.960519	1.1247181511811e-275	2.10806	SPI1	High	Mic
SLC18A1	75.09	0.960047	2.005684964682e-274	2.25569	SPI1	High	Mic
RYR1	46.1945	0.959711	1.52983242843044e-273	3.14015	SPI1	High	Mic
HLA-DMB	165.86	0.95958	3.34570821143559e-273	4.79742	SPI1	High	Mic
CARD11	93.3297	0.959233	2.66998818084678e-272	6.36335	SPI1	High	Mic
UGCG	67.9646	0.958802	3.43319991959257e-271	3.18048	SPI1	High	Mic
EML4	76.1276	0.958697	6.33796119749144e-271	2.01866	SPI1	High	Mic
ARRDC5	50.2232	0.95859	1.1821361288799e-270	4.11931	SPI1	High	Mic
KCNK6	50.2987	0.95837	4.26413919339561e-270	3.20024	SPI1	High	Mic
IKBKE	67.2512	0.958207	1.10122658870384e-269	2.82375	SPI1	High	Mic
LILRA4	154.408	0.958189	1.22168353770682e-269	5.03498	SPI1	High	Mic
ADPRH	74.663	0.957841	9.06967678060888e-269	2.51773	SPI1	High	Mic
TMEM71	34.3801	0.95782	1.02640045471838e-268	2.25569	SPI1	High	Mic
BMP2K	93.8049	0.95752	5.70387746025666e-268	2.36652	SPI1	High	Mic
ELK3	74.6468	0.957406	1.09503059294015e-267	2.14276	SPI1	High	Mic
VNN1	36.4587	0.957381	1.25602967757815e-267	2.25569	SPI1	High	Mic
PLA2G4A	40.648	0.957109	5.84725968386198e-267	2.68598	SPI1	High	Mic
TAB2	155.062	0.956722	5.16008271156102e-266	3.38553	SPI1	High	Mic
LINC01907	79.7951	0.955908	4.69238253518375e-264	3.3063	SPI1	High	Mic
LILRA2	169.344	0.955885	5.32556272242339e-264	5.26373	SPI1	High	Mic
FGD3	69.194	0.955297	1.31545523291644e-262	2.25136	SPI1	High	Mic
PRAM1	113.466	0.955012	6.11381722746584e-262	2.8057	SPI1	High	Mic
PILRA	87.5956	0.954976	7.39571051674683e-262	2.51773	SPI1	High	Mic
LRRC74A	160.574	0.954657	4.10363190210978e-261	6.83371	SPI1	High	Mic
ADRB2	63.0595	0.95464	4.492388765605e-261	2.25186	SPI1	High	Mic
CEBPB	140.694	0.954593	5.74907254982906e-261	2.97542	SPI1	High	Mic
ITGA5	96.2299	0.954207	4.45257629341248e-260	3.18464	SPI1	High	Mic
ITM2B	85.418	0.953895	2.28810709018448e-259	3.18464	SPI1	High	Mic
CXorf21	47.4307	0.953736	5.24998244664931e-259	2.19715	SPI1	High	Mic
STX7	34.5989	0.953516	1.65956581694649e-258	2.68598	SPI1	High	Mic
PLA2G15	92.1621	0.953221	7.67033488850633e-258	3.0882	SPI1	High	Mic
CXCL16	98.1476	0.952951	3.09033068373209e-257	2.34137	SPI1	High	Mic
CALHM6	52.2963	0.952522	2.7787135146541e-256	3.18048	SPI1	High	Mic
RAC2	119.881	0.952487	3.31481550411607e-256	3.9387	SPI1	High	Mic
LINC01146	55.9841	0.952359	6.35215299918309e-256	2.25569	SPI1	High	Mic
HLA-DOA	162.828	0.950765	1.78635455557572e-252	4.79742	SPI1	High	Mic
IL15RA	93.7201	0.950746	1.95554896832025e-252	2.13533	SPI1	High	Mic
OSCAR	106.93	0.950333	1.4671325237327e-251	4.19194	SPI1	High	Mic
ST14	88.4431	0.949823	1.72990084423982e-250	2.75101	SPI1	High	Mic
ZFP36L2	229.81	0.949595	5.16206476040524e-250	3.29757	SPI1	High	Mic
CORO1A	53.1617	0.949105	5.26975268260344e-249	2.17979	SPI1	High	Mic
PELI1	56.3574	0.94862	5.15442071849975e-248	3.60372	SPI1	High	Mic
PDCD1LG2	56.9938	0.94806	7.09241362926012e-247	2.25186	SPI1	High	Mic
HLA-DMA	160.138	0.947928	1.30950887705949e-246	4.79742	SPI1	High	Mic
STAT6	143.203	0.947616	5.51008734970489e-246	2.16979	SPI1	High	Mic
CCDC69	71.3872	0.947616	5.51206446585835e-246	2.36194	SPI1	High	Mic
RASGRP4	52.2431	0.947511	8.94798696324522e-246	2.69368	SPI1	High	Mic
SLC16A5	96.9731	0.947407	1.44036773208535e-245	2.58352	SPI1	High	Mic
LINC01426	66.2358	0.947263	2.75836893927463e-245	2.14276	SPI1	High	Mic
RCBTB2	102.268	0.946096	5.38814132108088e-243	4.53463	SPI1	High	Mic
APMAP	79.2023	0.9459	1.28844434497124e-242	3.55693	SPI1	High	Mic
SMIM35	141.561	0.945767	2.32176337793726e-242	5.5448	SPI1	High	Mic
RNF166	75.6664	0.945555	5.93850421879205e-242	2.13533	SPI1	High	Mic
ZNF710	110.486	0.945097	4.44957848994314e-241	2.05183	SPI1	High	Mic
ENG	72.8783	0.944415	8.62376437095255e-240	2.36194	SPI1	High	Mic
GPCPD1	50.782	0.944225	1.95782901071857e-239	2.69368	SPI1	High	Mic
SAT1	35.3957	0.944043	4.2860348539098e-239	3.14369	SPI1	High	Mic
PIK3CD	57.4012	0.943952	6.3190930232247e-239	2.03539	SPI1	High	Mic
MAML3	70.676	0.943892	8.17353710199388e-239	2.14276	SPI1	High	Mic
DOK3	75.9994	0.942928	4.905689265796e-237	3.18048	SPI1	High	Mic
CYP2S1	111.258	0.942822	7.6398407616866e-237	2.40313	SPI1	High	Mic
CAPG	104.029	0.94231	6.45180605054358e-236	2.63366	SPI1	High	Mic
SDCBP	36.1041	0.942037	1.9891816941923e-235	2.66314	SPI1	High	Mic
LINC00968	47.6249	0.941349	3.35493928161204e-234	2.68598	SPI1	High	Mic
USP6NL	134.857	0.941014	1.30506637491254e-233	5.44085	SPI1	High	Mic
HECA	46.8431	0.94034	1.95274504385046e-232	2.75101	SPI1	High	Mic
RNF135	99.6612	0.940318	2.13607168539737e-232	4.98956	SPI1	High	Mic
BMF	81.228	0.938918	5.39479317954931e-230	2.2251	SPI1	High	Mic
DENND2D	57.2831	0.938867	6.59044423055256e-230	3.14369	SPI1	High	Mic
LCP2	134.441	0.938472	3.05975797974179e-229	3.08845	SPI1	High	Mic
TLR10	93.6388	0.938074	1.42663382128656e-228	2.8057	SPI1	High	Mic
MICB	128.602	0.937958	2.22704826717144e-228	3.74356	SPI1	High	Mic
PLAG1	35.4475	0.937851	3.34877257994345e-228	2.17979	SPI1	High	Mic
SIRPB1	100.469	0.936949	1.03868649779163e-226	5.43737	SPI1	High	Mic
SH2B3	95.0524	0.936565	4.40592827339867e-226	2.33377	SPI1	High	Mic
LINC01094	97.6478	0.936155	2.04728319107013e-225	2.63366	SPI1	High	Mic
GPR160	38.9871	0.93591	5.10177455666445e-225	3.20024	SPI1	High	Mic
HLA-B	51.1096	0.935902	5.24094354334659e-225	2.14276	SPI1	High	Mic
LILRB3	136.726	0.935433	2.98083144365042e-224	5.59962	SPI1	High	Mic
RPL39	55.0794	0.935258	5.6953474733305e-224	2.66314	SPI1	High	Mic
GNLY	147.663	0.935165	8.02138095002871e-224	4.03811	SPI1	High	Mic
BTBD1	31.3279	0.933641	2.02467538270006e-221	2.68598	SPI1	High	Mic
RAB20	101.317	0.933096	1.42550093635879e-220	3.3555	SPI1	High	Mic
KCNMB1	134.349	0.932624	7.63090520810314e-220	3.47044	SPI1	High	Mic
PSMB8-AS1	171.989	0.932474	1.29699308828632e-219	3.7969	SPI1	High	Mic
GRK2	49.353	0.932351	1.99917106033074e-219	2.01866	SPI1	High	Mic
VASH1	136.607	0.931074	1.70959377964871e-217	5.89774	SPI1	High	Mic
NFKBIE	66.1518	0.93036	1.9843175731471e-216	3.62606	SPI1	High	Mic
HERPUD1	81.1246	0.928885	2.88419150823977e-214	4.53463	SPI1	High	Mic
ZC3H12D	95.8244	0.925233	4.20738791758761e-209	2.36681	SPI1	High	Mic
LTBR	140.191	0.925092	6.57621117655099e-209	3.60828	SPI1	High	Mic
RB1	78.1193	0.924328	7.27919308239924e-208	3.85823	SPI1	High	Mic
ZDHHC3	63.9415	0.923264	1.99739121252511e-206	2.617	SPI1	High	Mic
FERMT3	66.3469	0.921016	1.87319497279437e-203	2.75101	SPI1	High	Mic
LILRA1	160.214	0.9204	1.17544128875793e-202	4.95213	SPI1	High	Mic
NCK2	51.7999	0.920209	2.07366137177456e-202	3.71676	SPI1	High	Mic
TIMD4	49.0776	0.91953	1.53467313194136e-201	2.25569	SPI1	High	Mic
DAB2	62.0169	0.918425	3.85550510612758e-200	3.3063	SPI1	High	Mic
SCAMP2	88.1239	0.918343	4.89187478103588e-200	4.25695	SPI1	High	Mic
[truncated: 8,495 more rows]

## Sheet: Table_S7_legend
Supplemental Table S7: Supplemental_Table_S7.xlsx Putative downstream target genes of positive transcription factor regulators, with regulatory scores, correlation coefficients, FDR values, −log10 p-values, corresponding TFs, AD stage, and cell type.
