# Supplementary material for: Cell type–specific gene regulatory atlas prioritizes drug targets and repurposable medicines in Alzheimer's disease
Source: HighWire-hosted journal article supplement (doi:10.1101/gr.280436.125), 2026-01-21
Supplement: Supplemental_Table_S8.xlsx [file Supplemental_Table_S8.xlsx]

## Sheet: Supplemental_Table_S8
DrugID	Dis	Z_score	Pvalue	NAME	GROUPS	ATC_CODES	ATC.1st.level	CellType.x	Significance.x	Instance	Name	Dose	CL	ES	P	rank	FDR	CellType.y	Significance.y
DB00619	1.72	-2.04	0.02	Imatinib	[approved]	[L01XE01]	Antineoplastic and immnunomodulating agents	Inh	*	483	imatinib	1e-05	PC3	0.952529	0	43	0	Mic	***
DB00619	1.696	-2.543	0.024	Imatinib	[approved]	[L01XE01]	Antineoplastic and immnunomodulating agents	Ast	*	483	imatinib	1e-05	PC3	0.952529	0	43	0	Mic	***
DB00674	1.97	-2.617	0.009	Galantamine	[approved]	[N06DA04]	Nervous system	Inh	**	4772	galantamine	1.08e-05	MCF7	0.848738	0	43	0	Ast	***
DB00674	1.97	-2.617	0.009	Galantamine	[approved]	[N06DA04]	Nervous system	Inh	**	2131	galantamine	1.08e-05	HL60	1.03856	0	18	0	Inh	***
DB00721	1.972	-2.032	0.026	Procaine	[approved	investigational	vet_approved]	[N01BA52	C05AD05	S01HA05	N01BA02]	Nervous system	Inh	*	1838	procaine	1.46e-05	HL60	1.31379	0	31	0	Mic	***
DB00746	1.889	-2.035	0.013	Deferoxamine	[approved	investigational]	[V03AC01]	Various	Ext	*	3936	deferoxamine	6e-06	MCF7	1.22048	0	67	0	Mic	***
DB00746	1.889	-2.035	0.013	Deferoxamine	[approved	investigational]	[V03AC01]	Various	Ext	*	3936	deferoxamine	6e-06	MCF7	1.12048	0	9	0	Mic	***
DB00746	1.889	-2.035	0.013	Deferoxamine	[approved	investigational]	[V03AC01]	Various	Ext	*	3842	deferoxamine	6e-06	MCF7	1.08607	0	87	0	Mic	***
DB00746	1.889	-2.035	0.013	Deferoxamine	[approved	investigational]	[V03AC01]	Various	Ext	*	3842	deferoxamine	6e-06	MCF7	1.08856	0	13	0	Mic	***
DB00746	1.739	-2.605	0.005	Deferoxamine	[approved	investigational]	[V03AC01]	Various	Oli	**	3936	deferoxamine	6e-06	MCF7	1.22048	0	67	0	Mic	***
DB00746	1.739	-2.605	0.005	Deferoxamine	[approved	investigational]	[V03AC01]	Various	Oli	**	3936	deferoxamine	6e-06	MCF7	1.12048	0	9	0	Mic	***
DB00746	1.739	-2.605	0.005	Deferoxamine	[approved	investigational]	[V03AC01]	Various	Oli	**	3842	deferoxamine	6e-06	MCF7	1.08607	0	87	0	Mic	***
DB00746	1.739	-2.605	0.005	Deferoxamine	[approved	investigational]	[V03AC01]	Various	Oli	**	3842	deferoxamine	6e-06	MCF7	1.08856	0	13	0	Mic	***
DB00746	1.833	-2.486	0.006	Deferoxamine	[approved	investigational]	[V03AC01]	Various	Ast	**	3936	deferoxamine	6e-06	MCF7	1.22048	0	67	0	Mic	***
DB00746	1.833	-2.486	0.006	Deferoxamine	[approved	investigational]	[V03AC01]	Various	Ast	**	3936	deferoxamine	6e-06	MCF7	1.12048	0	9	0	Mic	***
DB00746	1.833	-2.486	0.006	Deferoxamine	[approved	investigational]	[V03AC01]	Various	Ast	**	3842	deferoxamine	6e-06	MCF7	1.08607	0	87	0	Mic	***
DB00746	1.833	-2.486	0.006	Deferoxamine	[approved	investigational]	[V03AC01]	Various	Ast	**	3842	deferoxamine	6e-06	MCF7	1.08856	0	13	0	Mic	***
DB00746	1.882	-2.066	0.01	Deferoxamine	[approved	investigational]	[V03AC01]	Various	Inh	*	3936	deferoxamine	6e-06	MCF7	1.22048	0	67	0	Mic	***
DB00746	1.882	-2.066	0.01	Deferoxamine	[approved	investigational]	[V03AC01]	Various	Inh	*	3936	deferoxamine	6e-06	MCF7	1.12048	0	9	0	Mic	***
DB00746	1.882	-2.066	0.01	Deferoxamine	[approved	investigational]	[V03AC01]	Various	Inh	*	3842	deferoxamine	6e-06	MCF7	1.08607	0	87	0	Mic	***
DB00746	1.882	-2.066	0.01	Deferoxamine	[approved	investigational]	[V03AC01]	Various	Inh	*	3842	deferoxamine	6e-06	MCF7	1.08856	0	13	0	Mic	***
DB01197	1.958	-2.222	0.013	Captopril	[approved]	[C09AA01	C09BA01]	Cardiovascular system	Inh	*	1907	captopril	1.72e-05	PC3	1.57934	0	40	0	Mic	***
DB01599	2.05	-2.269	0.012	Probucol	[approved	investigational]	[C10AX02]	Cardiovascular system	Inh	*	5261	probucol	7.8e-06	MCF7	0.925753	0	34	0	Ast	***
DB02010	1.781	-2.109	0.019	Staurosporine	[experimental]	[]		Ast	*	423	staurosporine	1e-07	MCF7	1.06102	0	32	0	Ast	***
DB02010	1.781	-2.109	0.019	Staurosporine	[experimental]	[]		Ast	*	423	staurosporine	1e-07	MCF7	1	0	30	0	Ast	***
DB02010	1.756	-3.19	0.002	Staurosporine	[experimental]	[]		Ext	**	423	staurosporine	1e-07	MCF7	1.06102	0	32	0	Ast	***
DB02010	1.756	-3.19	0.002	Staurosporine	[experimental]	[]		Ext	**	423	staurosporine	1e-07	MCF7	1	0	30	0	Ast	***
DB02010	1.636	-3.503	0.005	Staurosporine	[experimental]	[]		Inh	**	423	staurosporine	1e-07	MCF7	1.06102	0	32	0	Ast	***
DB02010	1.636	-3.503	0.005	Staurosporine	[experimental]	[]		Inh	**	423	staurosporine	1e-07	MCF7	1	0	30	0	Ast	***
DB02010	1.593	-3.567	0.006	Staurosporine	[experimental]	[]		Oli	**	423	staurosporine	1e-07	MCF7	1.06102	0	32	0	Ast	***
DB02010	1.593	-3.567	0.006	Staurosporine	[experimental]	[]		Oli	**	423	staurosporine	1e-07	MCF7	1	0	30	0	Ast	***
DB02709	1.681	-2.64	0.019	Resveratrol	[investigational]	[]		Ast	*	958	resveratrol	1e-05	MCF7	1	0	78	0	Inh	***
DB02709	1.644	-2.283	0.022	Resveratrol	[investigational]	[]		Oli	*	958	resveratrol	1e-05	MCF7	1	0	78	0	Inh	***
DB04216	1.585	-2.555	0.008	Quercetin	[experimental	investigational]	[]		Inh	**	2499	quercetin	1.18e-05	HL60	1.07149	0	50	0	Ast	***

## Sheet: Table_S8_legend
Supplemental Table S8: Supplemental_Table_S8.xlsx Summary of drug candidates prioritized by network proximity and GSEA methods, reporting Z-scores, enrichment p-values, drug classifications, dose/instance information, enrichment scores (ES), cell-type associations, and statistical significance.
