# Supplementary material for: Cell type–specific gene regulatory atlas prioritizes drug targets and repurposable medicines in Alzheimer's disease
Source: HighWire-hosted journal article supplement (doi:10.1101/gr.280436.125), 2026-01-21
Supplement: Supplemental_Table_S9.xlsx [file Supplemental_Table_S9.xlsx]

## Sheet: S_Table_S9_drug4stage_byGSEA
Instance	DB.ID	Name	Dose	CL	ES	P	rank	FDR	CellType	Stage
7004	DB14081	asiaticoside	4.2e-06	MCF7	0.979454	0	19	0	Ast	High
4471	DB00637	astemizole	8.8e-06	PC3	0.898794	0	36	0	Ast	High
2182	DB09018	bromopride	1.16e-05	HL60	1.15539	0	4	0	Ast	High
3686	DB01327	cefazolin	8.4e-06	PC3	1	0	28	0	Ast	High
2263	DB00356	chlorzoxazone	2.36e-05	MCF7	0.894513	0	64	0	Ast	High
6139	DB00260	cycloserine	3.92e-05	HL60	0.98059	0	57	0	Ast	High
6782	DB00260	cycloserine	3.92e-05	MCF7	0.947638	0	27	0	Ast	High
6816	DB00851	dacarbazine	2.2e-05	MCF7	0.96023	0	41	0	Ast	High
5751	DB11512	dihydrostreptomycin	2.8e-06	PC3	1.07202	0	35	0	Ast	High
1494	DB13720	diphemanil metilsulfate	1.02e-05	MCF7	1	0	61	0	Ast	High
4610	DB00997	doxorubicin	6.8e-06	PC3	0.899946	0	17	0	Ast	High
5255	DB02187	equilin	1.5e-05	MCF7	1.08905	0	6	0	Ast	High
6140	DB04573	estriol	1.38e-05	HL60	1.02081	0	62	0	Ast	High
6023	DB00180	flunisolide	9.2e-06	MCF7	0.883057	0	25	0	Ast	High
5269	DB00712	flurbiprofen	1.64e-05	MCF7	1.15178	0	12	0	Ast	High
5588	DB02424	geldanamycin	1e-06	MCF7	1	0	60	0	Ast	High
2185	DB06786	halcinonide	8.8e-06	HL60	1.22923	0	9	0	Ast	High
1628	DB00502	haloperidol	1e-05	MCF7	1	0	48	0	Ast	High
4282	DB01275	hydralazine	2.04e-05	PC3	1.16176	0	34	0	Ast	High
2271	DB00424	hyoscyamine	1.38e-05	MCF7	1.02852	0	15	0	Ast	High
3522	DB14075	imidurea	1.04e-05	MCF7	1	0	20	0	Ast	High
4286	DB01009	ketoprofen	1.58e-05	PC3	1.21171	0	14	0	Ast	High
6048	DB13467	lanatoside C	4e-06	MCF7	0.989182	0	44	0	Ast	High
1641	DB02656	LY-294002	1e-07	MCF7	1	0	55	0	Ast	High
3008	DB01357	mestranol	1.28e-05	HL60	1.06173	0	11	0	Ast	High
4285	DB01233	metoclopramide	1.18e-05	PC3	0.84198	0	16	0	Ast	High
4359	DB01173	orphenadrine	1.3e-05	MCF7	1.06298	0	24	0	Ast	High
3568	DB01580	oxprenolol	1.32e-05	MCF7	1	0	23	0	Ast	High
6770	DB01062	oxybutynin	1.02e-05	MCF7	1.13147	0	45	0	Ast	High
4393	DB01337	pancuronium bromide	5.4e-06	MCF7	1	0	40	0	Ast	High
2473	DB00738	pentamidine	6.8e-06	HL60	1.07792	0	59	0	Ast	High
1956	DB00850	perphenazine	1e-05	PC3	1	0	52	0	Ast	High
5248	DB00925	phenoxybenzamine	1.18e-05	MCF7	1	0	5	0	Ast	High
4652	DB00925	phenoxybenzamine	1.18e-05	PC3	1	0	54	0	Ast	High
5416	DB00457	prazosin	9.6e-06	MCF7	1.21631	0	65	0	Ast	High
4771	DB01032	probenecid	1.4e-05	MCF7	0.961009	0	37	0	Ast	High
6028	DB00420	promazine	1.24e-05	MCF7	0.973383	0	30	0	Ast	High
3100	DB01069	promethazine	1.24e-05	HL60	1.09349	0	51	0	Ast	High
7171	DB00165	pyridoxine	1.94e-05	MCF7	1	0	47	0	Ast	High
2499	DB04216	quercetin	1.18e-05	HL60	1.07149	0	50	0	Ast	High
3793	DB01325	quinethazone	1.38e-05	PC3	1.12572	0	56	0	Ast	High
4351	DB01325	quinethazone	1.38e-05	MCF7	1.09482	0	3	0	Ast	High
4485	DB00140	riboflavin	1.06e-05	PC3	0.937723	0	39	0	Ast	High
369	DB00412	rosiglitazone	1e-05	HL60	0.986738	0	22	0	Ast	High
1001	DB00877	sirolimus	1e-07	MCF7	1	0	42	0	Ast	High
423	DB02010	staurosporine	1e-07	MCF7	1.06102	0	32	0	Ast	High
2931	DB01056	tocainide	1.74e-05	HL60	1.00472	0	1	0	Ast	High
2120	DB09216	tolfenamic acid	1.52e-05	PC3	1	0	33	0	Ast	High
1211	DB00755	tretinoin	1e-06	PC3	1	0	7	0	Ast	High
5569	DB00313	valproic acid	0.001	MCF7	1.03038	0	31	0	Ast	High
1808	DB00819	acetazolamide	1.8e-05	PC3	1.77695	0	31	0	Ext	Inter
7484	DB01426	ajmaline	1.22e-05	MCF7	1.34407	0	25	0	Ext	High
4806	DB00915	amantadine	9.6e-06	MCF7	1.6255	0	22	0	Ext	Inter
5319	DB06742	ambroxol	9.6e-06	MCF7	1.82333	0	35	0	Ext	Inter
4109	DB00594	amiloride	1.32e-05	MCF7	1	0	14	0	Ext	High
1823	DB00321	amitriptyline	1.28e-05	PC3	1.86404	0	3	0	Ext	Inter
1530	DB00415	ampicillin	1e-05	MCF7	1.68893	0	33	0	Ext	Inter
1991	DB09088	amylocaine	1.48e-05	HL60	1.26533	0	50	0	Ext	High
6517	DB09009	articaine	1.24e-05	MCF7	1.43871	0	34	0	Ext	High
3143	DB07402	azapropazone	1.34e-05	HL60	1.76955	0	10	0	Ext	Inter
4196	DB12867	benperidol	1.04e-05	PC3	1.45147	0	19	0	Ext	High
641	DB12783	benserazide	1e-05	MCF7	1.67087	0	44	0	Ext	Inter
5322	DB12783	benserazide	1.36e-05	MCF7	1	0	37	0	Ext	High
3577	DB01053	benzylpenicillin	1.12e-05	MCF7	1.39303	0	33	0	Ext	High
5114	DB01019	bethanechol	2.04e-05	PC3	1.47079	0	13	0	Ext	High
5279	DB00810	biperiden	1.14e-05	MCF7	1.44635	0	22	0	Ext	High
5090	DB13346	bufexamac	1.8e-05	PC3	1.22617	0	14	0	Ext	High
2141	DB01833	canavanine	1.36e-05	HL60	1.15984	0	9	0	Ext	High
1683	DB00564	carbamazepine	1.7e-05	MCF7	1	0	44	0	Ext	High
7186	DB00493	cefotaxime	8.4e-06	MCF7	1.81578	0	26	0	Ext	Inter
2279	DB00856	chlorphenesin	1.62e-05	MCF7	1.24509	0	7	0	Ext	High
7456	DB00356	chlorzoxazone	2.36e-05	MCF7	1	0	10	0	Ext	High
1464	DB00501	cimetidine	1.58e-05	MCF7	1.87968	0	21	0	Ext	Inter
3252	DB00115	cyanocobalamin	3e-06	MCF7	1.82606	0	20	0	Ext	Inter
7455	DB09357	dexpanthenol	1.94e-05	MCF7	1.47015	0	59	0	Ext	High
3423	DB00266	dicoumarol	1.18e-05	MCF7	1	0	23	0	Ext	High
4077	DB00223	diflorasone	8e-06	PC3	1.67095	0	45	0	Ext	Inter
4158	DB00223	diflorasone	8e-06	MCF7	1.32625	0	40	0	Ext	High
4210	DB00861	diflunisal	1.6e-05	PC3	1.38096	0	3	0	Ext	High
4591	DB13720	diphemanil metilsulfate	1.02e-05	PC3	1.29411	0	48	0	Ext	High
5063	DB00651	diprophylline	1.58e-05	PC3	1.39334	0	42	0	Ext	High
5690	DB00450	droperidol	1.06e-05	MCF7	1.0589	0	24	0	Ext	High
7305	DB01127	econazole	9e-06	PC3	1.68612	0	29	0	Ext	Inter
387	DB00783	estradiol	1e-08	HL60	1.1625	0	7	0	Ext	High
6448	DB00655	estrone	1.48e-05	MCF7	1.33366	0	24	0	Ext	High
4736	DB00573	fenoprofen	7.2e-06	MCF7	1.37295	0	51	0	Ext	High
3412	DB00573	fenoprofen	7.2e-06	MCF7	1	0	12	0	Ext	High
3128	DB00301	flucloxacillin	8.4e-06	HL60	1.93463	0	11	0	Ext	Inter
3410	DB00663	flumetasone	9.8e-06	MCF7	1	0	4	0	Ext	High
3370	DB01095	fluvastatin	9.2e-06	MCF7	1.31878	0	57	0	Ext	High
7333	DB00176	fluvoxamine	9.2e-06	MCF7	1.70628	0	34	0	Ext	Inter
5588	DB02424	geldanamycin	1e-06	MCF7	1.28897	0	43	0	Ext	High
268	DB01645	genistein	1e-06	MCF7	1.39451	0	17	0	Ext	High
3126	DB01251	gliquidone	7.6e-06	HL60	1.84077	0	12	0	Ext	Inter
1807	DB00458	imipramine	1.26e-05	PC3	1.71936	0	30	0	Ext	Inter
1685	DB00458	imipramine	1.26e-05	MCF7	1.05391	0	5	0	Ext	High
3859	DB00808	indapamide	1.06e-05	MCF7	1.31747	0	28	0	Ext	High
6726	DB09134	ioversol	5e-06	PC3	1.34905	0	60	0	Ext	High
3528	DB09313	ioxaglic acid	3.2e-06	MCF7	1.22727	0	38	0	Ext	High
1820	DB08942	isoxicam	1.2e-05	PC3	1.81897	0	19	0	Ext	Inter
2213	DB00602	ivermectin	4.6e-06	MCF7	1.28267	0	12	0	Ext	High
4985	DB11423	lasalocid	6.6e-06	MCF7	1.61896	0	24	0	Ext	Inter
3701	DB01403	levomepromazine	9e-06	PC3	1.82543	0	1	0	Ext	Inter
1227	DB02656	LY-294002	1e-05	PC3	1.53405	0	16	0	Ext	Inter
4211	DB13808	mebhydrolin	4.8e-06	PC3	1.3567	0	4	0	Ext	High
1821	DB00784	mefenamic acid	1.66e-05	PC3	1.8652	0	17	0	Ext	Inter
3584	DB00244	mesalazine	2.62e-05	MCF7	1.3903	0	29	0	Ext	High
6106	DB00264	metoprolol	5.8e-06	MCF7	1.21241	0	10	0	Ext	High
1797	DB11473	metrifonate	1.56e-05	PC3	1.73157	0	28	0	Ext	Inter
4156	DB01578	metrizamide	5e-06	MCF7	1.21669	0	39	0	Ext	High
614	DB04331	monastrol	2e-05	MCF7	1.91945	0	51	0	Ext	Inter
2959	DB00680	moracizine	8.6e-06	HL60	1.69896	0	37	0	Ext	Inter
5457	DB00788	naproxen	1.74e-05	MCF7	1.68418	0	8	0	Ext	Inter
3548	DB00826	natamycin	6e-06	MCF7	1.37863	0	36	0	Ext	High
1814	DB01115	nifedipine	1.16e-05	PC3	1.85532	0	32	0	Ext	Inter
3320	DB00336	nitrofural	2.02e-05	MCF7	1.46899	0	45	0	Ext	High
4697	DB00698	nitrofurantoin	1.68e-05	MCF7	1.29029	0	47	0	Ext	High
6182	DB00179	nordihydroguaiaretic acid	1e-06	HL60	1.70978	0	42	0	Ext	Inter
7300	DB00540	nortriptyline	1.34e-05	PC3	1.42011	0	55	0	Ext	High
3801	DB01173	orphenadrine	1.3e-05	PC3	1.1747	0	11	0	Ext	High
6720	DB01229	paclitaxel	4.6e-06	PC3	1.60207	0	40	0	Ext	Inter
7271	DB01186	pergolide	9.8e-06	PC3	1.84403	0	38	0	Ext	Inter
6105	DB13337	pheneticillin	1e-05	MCF7	1.42822	0	15	0	Ext	High
4283	DB00914	phenformin	1.66e-05	PC3	1.44898	0	9	0	Ext	High
5613	DB00925	phenoxybenzamine	1.18e-05	MCF7	1	0	13	0	Ext	High
3521	DB00832	phensuximide	2.12e-05	MCF7	1.40688	0	21	0	Ext	High
6741	DB01085	pilocarpine	1.48e-05	PC3	1.46829	0	53	0	Ext	High
6519	DB09244	pirlindole	1.24e-05	MCF7	1.49156	0	35	0	Ext	High
6103	DB01179	podophyllotoxin	9.6e-06	MCF7	1.31034	0	16	0	Ext	High
5119	DB01130	prednicarbate	8.2e-06	PC3	1.36921	0	1	0	Ext	High
265	DB00860	prednisolone	1e-06	MCF7	1.4335	0	31	0	Ext	High
6792	DB00178	ramipril	9.6e-06	MCF7	1.15898	0	6	0	Ext	High
6765	DB03615	ribostamycin	7.2e-06	MCF7	1.80629	0	43	0	Ext	Inter
6449	DB01954	rolipram	1.46e-05	MCF7	1.34018	0	27	0	Ext	High
3511	DB11458	roxarsone	1.52e-05	MCF7	1	0	18	0	Ext	High
4219	DB00747	scopolamine	1.18e-05	PC3	1.08111	0	5	0	Ext	High
6958	DB00877	sirolimus	1e-07	MCF7	1.76006	0	13	0	Ext	Inter
1242	DB00877	sirolimus	1e-07	PC3	1.65857	0	15	0	Ext	Inter
5602	DB00877	sirolimus	1e-07	MCF7	1.63328	0	14	0	Ext	Inter
7193	DB00428	streptozocin	1.5e-05	MCF7	1.83368	0	25	0	Ext	Inter
2159	DB09355	sulfabenzamide	1.44e-05	HL60	1.84435	0	27	0	Ext	Inter
1064	DB05134	tanespimycin	1e-06	MCF7	1	0	25	0	Ext	High
2844	DB00251	terconazole	7.6e-06	MCF7	1.08668	0	20	0	Ext	High
6473	DB13399	terguride	8.8e-06	MCF7	1.42914	0	30	0	Ext	High
1486	DB00679	thioridazine	9.8e-06	MCF7	1.42587	0	49	0	Ext	High
1655	DB00679	thioridazine	1e-05	MCF7	1.38626	0	32	0	Ext	High
4686	DB13025	tiapride	1.1e-05	MCF7	1.38968	0	46	0	Ext	High
2692	DB00197	troglitazone	1e-05	HL60	1.73897	0	48	0	Ext	Inter
1222	DB00313	valproic acid	5e-05	PC3	1.63631	0	18	0	Ext	Inter
2858	DB00512	vancomycin	2.6e-06	MCF7	1.69935	0	49	0	Ext	Inter
4147	DB11477	xylazine	1.82e-05	MCF7	1.19749	0	15	0	Ext	High
7352	DB00943	zalcitabine	1.9e-05	MCF7	1.77866	0	9	0	Ext	Inter
4793	DB02918	zardaverine	1.5e-05	MCF7	1.3352	0	52	0	Ext	High
6559	DB03444	6-bromoindirubin-3'-oxime	5e-07	PC3	1	0	90	0	Inh	High
7461	DB00819	acetazolamide	1.8e-05	MCF7	1	0	37	0	Inh	High
5364	DB07374	anisomycin	1.5e-05	MCF7	1.08858	0	49	0	Inh	High
2005	DB00714	apomorphine	6.4e-06	HL60	1	0	3	0	Inh	High
6807	DB00637	astemizole	8.8e-06	MCF7	1.12865	0	2	0	Inh	High
4471	DB00637	astemizole	8.8e-06	PC3	0.935832	0	62	0	Inh	High
6070	DB11125	benzethonium chloride	9e-06	MCF7	1	0	65	0	Inh	High
4224	DB01086	benzocaine	2.42e-05	PC3	1.20725	0	91	0	Inh	High
3577	DB01053	benzylpenicillin	1.12e-05	MCF7	1.2414	0	33	0	Inh	High
4999	DB01393	bezafibrate	1.1e-05	MCF7	1	0	15	0	Inh	High
4604	DB01200	bromocriptine	5.4e-06	PC3	0.999073	0	55	0	Inh	High
7457	DB12401	bromperidol	9.6e-06	MCF7	1	0	36	0	Inh	High
3271	DB00835	brompheniramine	9.2e-06	MCF7	1	0	23	0	Inh	High
2437	DB00389	carbimazole	2.14e-05	HL60	1.06894	0	81	0	Inh	High
3893	DB08936	chlorcyclizine	1.18e-05	MCF7	1.08914	0	12	0	Inh	High
7456	DB00356	chlorzoxazone	2.36e-05	MCF7	1	0	31	0	Inh	High
2456	DB01188	ciclopirox	1.5e-05	HL60	1.17647	0	60	0	Inh	High
4071	DB01049	co-dergocrine mesilate	6.4e-06	PC3	1.15587	0	82	0	Inh	High
4628	DB00265	crotamiton	1.96e-05	PC3	1.19382	0	4	0	Inh	High
7507	DB00694	daunorubicin	1e-06	MCF7	1.20505	0	13	0	Inh	High
4405	DB00804	dicycloverine	1.16e-05	MCF7	1.16394	0	1	0	Inh	High
7284	DB09167	dosulepin	1.2e-05	PC3	1	0	58	0	Inh	High
1681	DB08991	epirizole	1.7e-05	MCF7	1	0	30	0	Inh	High
1633	DB00783	estradiol	1e-07	MCF7	1	0	41	0	Inh	High
5318	DB00783	estradiol	1.46e-05	MCF7	1	0	34	0	Inh	High
4639	DB07477	felbinac	1.88e-05	PC3	1.26799	0	19	0	Inh	High
3190	DB08980	fendiline	1.14e-05	MCF7	1.29046	0	63	0	Inh	High
6463	DB04842	fluspirilene	8.4e-06	MCF7	1.24899	0	86	0	Inh	High
1238	DB00947	fulvestrant	1e-08	PC3	1.18231	0	40	0	Inh	High
5964	DB00947	fulvestrant	1e-06	MCF7	1	0	28	0	Inh	High
3197	DB00695	furosemide	1.2e-05	MCF7	1.07713	0	59	0	Inh	High
2131	DB00674	galantamine	1.08e-05	HL60	1.03856	0	18	0	Inh	High
1235	DB01645	genistein	1e-05	PC3	0.995551	0	54	0	Inh	High
4642	DB00629	guanabenz	1.38e-05	PC3	1.22778	0	56	0	Inh	High
4427	DB00502	haloperidol	1e-05	PC3	1.45747	0	76	0	Inh	High
1244	DB00502	haloperidol	1e-05	PC3	1.23619	0	24	0	Inh	High
6077	DB07931	hexestrol	1.48e-05	MCF7	1	0	79	0	Inh	High
4630	DB14061	hycanthone	1.12e-05	PC3	1.20643	0	7	0	Inh	High
2083	DB00951	isoniazid	2.92e-05	PC3	1.07665	0	11	0	Inh	High
4394	DB01235	levodopa	2.02e-05	MCF7	0.94999	0	9	0	Inh	High
1227	DB02656	LY-294002	1e-05	PC3	1.03732	0	88	0	Inh	High
1216	DB02656	LY-294002	1e-07	PC3	0.888889	0	80	0	Inh	High
3405	DB13758	meclofenoxate	1.36e-05	MCF7	1	0	25	0	Inh	High
2210	DB00358	mefloquine	9.6e-06	MCF7	1.02022	0	87	0	Inh	High
6024	DB04843	mepenzolate bromide	9.6e-06	MCF7	0.987937	0	71	0	Inh	High
7321	DB00931	metacycline	8.4e-06	MCF7	1	0	84	0	Inh	High
6248	DB06709	methacholine chloride	2.04e-05	MCF7	1	0	16	0	Inh	High
3862	DB00379	mexiletine	1.86e-05	MCF7	1.10212	0	6	0	Inh	High
6362	DB11636	nomegestrol	1.08e-05	PC3	1.12765	0	92	0	Inh	High
1223	DB00179	nordihydroguaiaretic acid	1e-06	PC3	1.10819	0	83	0	Inh	High
6491	DB13251	octopamine	2.1e-05	MCF7	1	0	66	0	Inh	High
6680	DB01092	ouabain	5.4e-06	PC3	1.09786	0	22	0	Inh	High
1956	DB00850	perphenazine	1e-05	PC3	1	0	52	0	Inh	High
3521	DB00832	phensuximide	2.12e-05	MCF7	1.22205	0	53	0	Inh	High
3178	DB01100	pimozide	8.6e-06	MCF7	0.987295	0	69	0	Inh	High
5526	DB00860	prednisolone	1.1e-05	MCF7	1	0	21	0	Inh	High
3861	DB13431	proglumide	1.2e-05	MCF7	1.09198	0	5	0	Inh	High
3048	DB00818	propofol	2.24e-05	HL60	1.06753	0	85	0	Inh	High
6494	DB13449	proxyphylline	1.68e-05	MCF7	1	0	73	0	Inh	High
958	DB02709	resveratrol	1e-05	MCF7	1	0	78	0	Inh	High
3516	DB00896	rimexolone	1.08e-05	MCF7	1.1408	0	43	0	Inh	High
5218	DB00877	sirolimus	1e-07	MCF7	1	0	45	0	Inh	High
1817	DB00634	sulfacetamide	1.58e-05	PC3	1.27788	0	39	0	Inh	High
2882	DB00795	sulfasalazine	1e-05	MCF7	1	0	20	0	Inh	High
7014	DB13814	talampicillin	7.8e-06	MCF7	1	0	42	0	Inh	High
1010	DB00679	thioridazine	1e-05	MCF7	1.12627	0	67	0	Inh	High
3896	DB00911	tinidazole	1.62e-05	MCF7	1.0065	0	14	0	Inh	High
2841	DB00684	tobramycin	8.6e-06	MCF7	1	0	57	0	Inh	High
1004	DB00831	trifluoperazine	1e-05	MCF7	0.888889	0	68	0	Inh	High
3559	DB00432	trifluridine	1.36e-05	MCF7	1.15503	0	35	0	Inh	High
462	DB00197	troglitazone	1e-05	PC3	1.07387	0	44	0	Inh	High
2309	DB00809	tropicamide	1.4e-05	MCF7	0.888889	0	70	0	Inh	High
6133	DB00460	verteporfin	2.8e-06	HL60	1.00854	0	26	0	Inh	High
1791	DB01667	8-azaguanine	2.62e-05	PC3	0.637464	0	267	0	Mic	High
1833	DB01667	8-azaguanine	2.62e-05	HL60	0.541387	0	337	0	Mic	High
1670	DB01667	8-azaguanine	2.62e-05	MCF7	0.529915	0.01	2037	0.029946	Mic	High
2769	DB01614	acepromazine	9e-06	MCF7	0.540953	0	786	0	Mic	High
6832	DB01614	acepromazine	9e-06	MCF7	0.508246	0	862	0	Mic	High
4494	DB01614	acepromazine	9e-06	PC3	0.426445	0	572	0	Mic	High
6924	DB00945	acetylsalicylic acid	1e-04	MCF7	0.512108	0	871	0	Mic	High
5564	DB00945	acetylsalicylic acid	1e-04	MCF7	0.491022	0	454	0	Mic	High
6094	DB00240	alclometasone	7.6e-06	MCF7	1.03063	0	52	0	Mic	High
1586	DB00346	alfuzosin	9.4e-06	HL60	0.585972	0.01	2000	0.0305	Mic	High
1426	DB01616	alverine	8.4e-06	HL60	0.487125	0	1380	0	Mic	High
1051	DB12442	alvespimycin	1e-07	MCF7	0.712006	0	9	0	Mic	Low
4222	DB00915	amantadine	9.6e-06	PC3	1.00868	0	144	0	Mic	High
6294	DB00345	aminohippuric acid	2.06e-05	PC3	0.395213	0.01	1444	0.0422438	Mic	High
6818	DB01424	aminophenazone	1.72e-05	MCF7	0.389099	0.01	1743	0.0349971	Mic	High
6295	DB01223	aminophylline	9.6e-06	PC3	0.458509	0.01	1443	0.042273	Mic	High
5618	DB01118	amiodarone	5.8e-06	MCF7	0.428499	0	460	0	Mic	High
5747	DB00613	amodiaquine	8.6e-06	PC3	0.472934	0.01	1618	0.0377009	Mic	High
3186	DB00613	amodiaquine	8.6e-06	MCF7	0.390882	0.01	1562	0.0390525	Mic	High
4578	DB07352	apigenin	1.48e-05	PC3	0.436715	0.02	2609	0.0467612	Mic	High
6322	DB04365	arecoline	1.7e-05	PC3	1.20224	0	75	0	Mic	High
7244	DB14081	asiaticoside	4.2e-06	PC3	0.864086	0	64	0	Mic	Low
4786	DB01117	atovaquone	1.1e-05	MCF7	0.418456	0	619	0	Mic	High
3573	DB11376	azaperone	1.22e-05	MCF7	0.491453	0	678	0	Mic	High
338	DB00993	azathioprine	1e-04	MCF7	0.335133	0.01	1517	0.0402109	Mic	High
4196	DB12867	benperidol	1.04e-05	PC3	0.90675	0	12	0	Mic	Low
2836	DB12867	benperidol	1.04e-05	MCF7	0.590834	0	735	0	Mic	High
4781	DB12867	benperidol	1.04e-05	MCF7	0.464303	0.01	1980	0.0308081	Mic	High
4196	DB12867	benperidol	1.04e-05	PC3	0.452279	0.01	1584	0.0385101	Mic	High
6334	DB00868	benzonatate	6.6e-06	PC3	0.446794	0.01	1688	0.0361374	Mic	High
6607	DB00562	benzthiazide	9.2e-06	PC3	0.51532	0	888	0	Mic	High
3577	DB01053	benzylpenicillin	1.12e-05	MCF7	0.47534	0.01	1678	0.0363528	Mic	High
6839	DB01053	benzylpenicillin	1.12e-05	MCF7	0.463585	0	863	0	Mic	High
2629	DB01244	bepridil	1e-05	MCF7	0.381766	0.01	1435	0.0425087	Mic	High
4956	DB06698	betahistine	1.72e-05	MCF7	0.567917	0	593	0	Mic	High
4608	DB00195	betaxolol	1.16e-05	PC3	0.430981	0.01	2103	0.0290062	Mic	High
6344	DB00272	betazole	2.7e-05	PC3	1.36656	0	95	0	Mic	High
3281	DB12480	betulinic acid	8.8e-06	MCF7	0.807996	0	33	0	Mic	Low
3057	DB01158	bretylium tosilate	9.6e-06	HL60	0.670886	0	25	0	Mic	Inter
5665	DB01200	bromocriptine	5.4e-06	MCF7	0.634921	0	26	0	Mic	Inter
1507	DB01200	bromocriptine	5.4e-06	MCF7	0.511396	0	1253	0	Mic	High
3617	DB09018	bromopride	1.16e-05	MCF7	0.556966	0	529	0	Mic	High
4278	DB09018	bromopride	1.16e-05	PC3	0.482164	0	642	0	Mic	High
2872	DB12401	bromperidol	9.6e-06	MCF7	0.526701	0	696	0	Mic	High
3271	DB00835	brompheniramine	9.2e-06	MCF7	0.515196	0	879	0	Mic	High
6330	DB01222	budesonide	9.2e-06	PC3	0.552062	0	564	0	Mic	High
5515	DB13346	bufexamac	1.8e-05	MCF7	0.551997	0	480	0	Mic	High
2382	DB13346	bufexamac	1.8e-05	HL60	0.50926	0	215	0	Mic	High
4840	DB13510	buflomedil	1.16e-05	MCF7	1.12325	0	109	0	Mic	High
3288	DB00639	butoconazole	8.4e-06	MCF7	1.1656	0	22	0	Mic	High
3288	DB00639	butoconazole	8.4e-06	MCF7	0.511396	0.01	1622	0.0376079	Mic	High
6288	DB00639	butoconazole	8.4e-06	PC3	0.472222	0.01	1408	0.0433239	Mic	High
4647	DB14084	butyl hydroxybenzoate	2.06e-05	PC3	0.440704	0.01	1921	0.0317543	Mic	High
6783	DB09015	canrenoic acid	1e-05	MCF7	0.429058	0.01	1608	0.0379353	Mic	High
483	DB00619	imatinib	1e-05	PC3	0.952529	0	43	0	Mic	High
3372	DB06774	capsaicin	1.3e-05	MCF7	0.838559	0	17	0	Mic	Low
5673	DB06774	capsaicin	1.3e-05	MCF7	0.809997	0	2	0	Mic	Low
1907	DB01197	captopril	1.72e-05	PC3	1.57934	0	40	0	Mic	High
6742	DB00411	carbachol	2.18e-05	PC3	0.451574	0	898	0	Mic	High
835	DB00564	carbamazepine	1e-07	MCF7	0.643162	0	990	0	Mic	High
4654	DB00567	cefalexin	1.1e-05	PC3	0.434157	0.01	1937	0.031492	Mic	High
5250	DB00567	cefalexin	1.1e-05	MCF7	0.430511	0.01	1489	0.0409671	Mic	High
6819	DB00456	cefalotin	9.6e-06	MCF7	0.466579	0.01	1742	0.0350172	Mic	High
3426	DB01327	cefazolin	8.4e-06	MCF7	0.567994	0	820	0	Mic	High
7385	DB01327	cefazolin	8.4e-06	PC3	0.493176	0	1363	0	Mic	High
2524	DB00274	cefmetazole	8.2e-06	HL60	1.00448	0	24	0	Mic	High
1627	DB01329	cefoperazone	5.8e-06	HL60	0.589517	0	1265	0	Mic	High
1389	DB00493	cefotaxime	8.4e-06	HL60	0.726426	0	31	0	Mic	Inter
3328	DB13499	cefsulodin	7.2e-06	MCF7	1.18055	0	10	0	Mic	High
4345	DB00291	chlorambucil	1.32e-05	MCF7	0.39886	0.02	2504	0.048722	Mic	High
3893	DB08936	chlorcyclizine	1.18e-05	MCF7	1.35433	0	57	0	Mic	High
3282	DB12029	chlorogenic acid	1.12e-05	MCF7	1.07189	0	74	0	Mic	High
2055	DB01114	chlorphenamine	1.02e-05	PC3	0.566044	0	96	0	Mic	High
6977	DB00477	chlorpromazine	1e-06	MCF7	0.641738	0	755	0	Mic	High
5577	DB00477	chlorpromazine	1e-06	MCF7	0.4843	0	456	0	Mic	High
1217	DB00477	chlorpromazine	1e-06	PC3	0.435185	0	1092	0	Mic	High
1864	DB00477	chlorpromazine	1.12e-05	HL60	0.400036	0	400	0	Mic	High
5291	DB01239	chlorprothixene	1.14e-05	MCF7	1.08605	0	27	0	Mic	Low
2042	DB09093	chlortetracycline	7.8e-06	HL60	0.354962	0.01	1845	0.0330623	Mic	High
4358	DB01000	ciclacillin	1.18e-05	MCF7	0.439153	0	659	0	Mic	High
2456	DB01188	ciclopirox	1.5e-05	HL60	0.529692	0.01	2079	0.029341	Mic	High
1884	DB00501	cimetidine	1.58e-05	PC3	1.10371	0	33	0	Mic	High
4144	DB00501	cimetidine	1.58e-05	MCF7	0.429044	0.01	1612	0.0378412	Mic	High
3305	DB00604	cisapride	8.6e-06	MCF7	1.23744	0	19	0	Mic	High
2176	DB13442	citiolone	2.52e-05	HL60	0.364112	0.02	2586	0.0471771	Mic	High
5266	DB01407	clenbuterol	1.28e-05	MCF7	0.509743	0.01	1534	0.0397653	Mic	High
1373	DB01190	clindamycin	8.6e-06	HL60	0.603221	0	8	0	Mic	Inter
5258	DB04815	clioquinol	1.3e-05	MCF7	0.536965	0.01	1509	0.0404241	Mic	High
4663	DB04815	clioquinol	1.3e-05	PC3	0.476223	0	598	0	Mic	High
3084	DB04815	clioquinol	1.3e-05	HL60	0.458871	0.01	1673	0.0364614	Mic	High
6095	DB11750	clobetasol	8.6e-06	MCF7	0.427996	0	545	0	Mic	High
1624	DB00845	clofazimine	8.4e-06	HL60	1.16172	0	142	0	Mic	High
263	DB00636	clofibrate	0.00015	MCF7	1.12755	0	128	0	Mic	High
4994	DB00882	clomifene	6.6e-06	MCF7	1.15502	0	108	0	Mic	High
2624	DB00882	clomifene	6.6e-06	MCF7	0.541261	0	162	0	Mic	High
4994	DB00882	clomifene	6.6e-06	MCF7	0.538711	0	577	0	Mic	High
6825	DB01242	clomipramine	1.14e-05	MCF7	1.2435	0	115	0	Mic	High
1566	DB01242	clomipramine	1.14e-05	HL60	0.616405	0	1293	0	Mic	High
6825	DB01242	clomipramine	1.14e-05	MCF7	0.549143	0	858	0	Mic	High
1555	DB00575	clonidine	1.5e-05	HL60	0.597202	0	1326	0	Mic	High
6814	DB00575	clonidine	1.5e-05	MCF7	0.452524	0	855	0	Mic	High
4732	DB09002	cloperastine	1.1e-05	MCF7	0.507602	0	597	0	Mic	High
3710	DB09002	cloperastine	1.1e-05	PC3	0.425985	0.01	1499	0.0406938	Mic	High
5726	DB00257	clotrimazole	1.16e-05	PC3	0.418091	0.01	1635	0.0373089	Mic	High
4453	DB00363	clozapine	1e-05	PC3	0.607493	0	585	0	Mic	High
1229	DB00363	clozapine	1e-05	PC3	0.495014	0	1187	0	Mic	High
5675	DB01394	colchicine	1e-05	MCF7	1.09337	0	39	0	Mic	High
4614	DB01394	colchicine	1e-05	PC3	0.530119	0.01	2009	0.0303634	Mic	High
2385	DB14681	cortisone	1.1e-05	HL60	0.500802	0	214	0	Mic	High
4572	DB00115	cyanocobalamin	3e-06	PC3	0.445485	0.02	2570	0.0474708	Mic	High
4813	DB13532	cyclopenthiazide	1.06e-05	MCF7	0.620565	0	22	0	Mic	Inter
3555	DB00979	cyclopentolate	1.22e-05	MCF7	1.16793	0	140	0	Mic	High
3555	DB00979	cyclopentolate	1.22e-05	MCF7	0.432622	0	822	0	Mic	High
1938	DB00434	cyproheptadine	1.24e-05	PC3	1.4556	0	25	0	Mic	High
2754	DB00851	dacarbazine	2.2e-05	MCF7	0.586407	0	736	0	Mic	High
6816	DB00851	dacarbazine	2.2e-05	MCF7	0.458044	0	856	0	Mic	High
2369	DB01219	dantrolene	1.18e-05	HL60	0.41436	0.01	1801	0.0338701	Mic	High
5078	DB00250	dapsone	1.62e-05	PC3	0.377493	0.01	1975	0.0308861	Mic	High
3936	DB00746	deferoxamine	6e-06	MCF7	1.22048	0	67	0	Mic	High
3842	DB00746	deferoxamine	6e-06	MCF7	1.08607	0	87	0	Mic	High
3604	DB00618	demeclocycline	8e-06	MCF7	0.430348	0	532	0	Mic	High
1103	DB13318	demecolcine	1.17e-05	MCF7	1.04922	0	26	0	Mic	Low
6296	DB04209	dequalinium chloride	7.6e-06	PC3	0.498106	0	524	0	Mic	High
2631	DB04209	dequalinium chloride	7.6e-06	MCF7	0.402866	0.02	2481	0.0491737	Mic	High
6712	DB09213	dexibuprofen	1.94e-05	PC3	0.440509	0.01	1568	0.0389031	Mic	High
1844	DB09357	dexpanthenol	1.94e-05	HL60	0.612748	0	414	0	Mic	High
2636	DB00514	dextromethorphan	1.08e-05	MCF7	0.385446	0.02	2484	0.0491143	Mic	High
1483	DB00804	dicycloverine	1.16e-05	MCF7	0.535698	0	1339	0	Mic	High
3448	DB00890	dienestrol	1.5e-05	MCF7	0.494302	0	840	0	Mic	High
2567	DB00255	diethylstilbestrol	1.5e-05	HL60	0.778591	0	4	0	Mic	Low
4369	DB00255	diethylstilbestrol	1.5e-05	MCF7	0.534354	0	657	0	Mic	High
2374	DB01231	difenidol	1.16e-05	HL60	0.740387	0	1	0	Mic	Inter
7447	DB01231	difenidol	1.16e-05	MCF7	0.620142	0	950	0	Mic	High
4158	DB00223	diflorasone	8e-06	MCF7	0.433883	0.01	1570	0.0388535	Mic	High
4210	DB00861	diflunisal	1.6e-05	PC3	0.431962	0.01	1609	0.0379117	Mic	High
1745	DB13345	dihydroergocristine	5.6e-06	HL60	1.29167	0	118	0	Mic	High
3665	DB13715	dilazep	6e-06	PC3	0.440416	0	534	0	Mic	High
5699	DB11221	dioxybenzone	1.64e-05	MCF7	1.22911	0	135	0	Mic	High
4299	DB01146	diphenylpyraline	1.26e-05	PC3	0.438683	0	630	0	Mic	High
1517	DB00975	dipyridamole	8e-06	MCF7	0.470845	0	1330	0	Mic	High
4656	DB00975	dipyridamole	8e-06	PC3	0.435897	0.01	1818	0.0335534	Mic	High
1589	DB00841	dobutamine	1.18e-05	HL60	0.510391	0	1317	0	Mic	High
6286	DB00841	dobutamine	1.18e-05	PC3	0.434126	0.01	1553	0.0392788	Mic	High
2864	DB09167	dosulepin	1.2e-05	MCF7	0.756311	0	38	0	Mic	Low
6642	DB00590	doxazosin	7.4e-06	PC3	0.507835	0	891	0	Mic	High
7415	DB01142	doxepin	1.26e-05	MCF7	0.947213	0	55	0	Mic	Low
6337	DB01142	doxepin	1.26e-05	PC3	0.499538	0.01	1764	0.0345805	Mic	High
1973	DB00366	doxylamine	1.02e-05	HL60	0.771853	0	9	0	Mic	Inter
2398	DB13785	dropropizine	1.7e-05	HL60	0.322506	0.01	1880	0.0324468	Mic	High
2811	DB00378	dydrogesterone	1.28e-05	MCF7	1.17853	0	148	0	Mic	High
2811	DB00378	dydrogesterone	1.28e-05	MCF7	0.517911	0	773	0	Mic	High
5001	DB01010	edrophonium chloride	1.98e-05	MCF7	0.527066	0	581	0	Mic	High
2801	DB13393	emetine	7.2e-06	MCF7	0.564778	0	780	0	Mic	High
4827	DB13393	emetine	7.2e-06	MCF7	0.45471	0	613	0	Mic	High
7428	DB00584	enalapril	8.2e-06	MCF7	1.03585	0	16	0	Mic	Low
2397	DB00584	enalapril	8.2e-06	HL60	0.442694	0.01	1877	0.0324987	Mic	High
4655	DB00467	enoxacin	1.24e-05	PC3	0.523832	0.01	1945	0.0313625	Mic	High
7292	DB08991	epirizole	1.7e-05	PC3	1.08748	0	97	0	Mic	High
1681	DB08991	epirizole	1.7e-05	MCF7	0.581551	0	299	0	Mic	High
3304	DB00153	ergocalciferol	1e-05	MCF7	0.58547	0	813	0	Mic	High
6729	DB00199	erythromycin	5.4e-06	PC3	0.434885	0	896	0	Mic	High
5960	DB00783	estradiol	1e-08	PC3	1.12809	0	26	0	Mic	High
373	DB00783	estradiol	1e-08	ssMCF7	0.818182	0	13	0	Mic	Low
1149	DB00783	estradiol	1e-07	HL60	0.58517	0	1105	0	Mic	High
4993	DB00655	estrone	1.48e-05	MCF7	0.461682	0	576	0	Mic	High
5742	DB00903	etacrynic acid	1.32e-05	PC3	0.442368	0.01	1624	0.0375616	Mic	High
1730	DB08989	etamivan	1.8e-05	HL60	1.17446	0	129	0	Mic	High
2116	DB00593	ethosuximide	2.84e-05	PC3	0.5992	0	8	0	Mic	High
6052	DB00754	ethotoin	1.96e-05	MCF7	0.424856	0	543	0	Mic	High
4564	DB01077	etidronic acid	1.6e-05	PC3	0.457921	0.01	1908	0.0319706	Mic	High
2930	DB08985	etilefrine	1.84e-05	HL60	0.45007	0.01	1708	0.0357143	Mic	High
3989	DB08984	etofenamate	1.08e-05	PC3	0.522928	0	475	0	Mic	High
1626	DB00773	etoposide	6.8e-06	HL60	0.561747	0	1266	0	Mic	High
848	DB01023	felodipine	1e-05	MCF7	0.553905	0.01	1665	0.0366366	Mic	High
2360	DB11410	fenbendazole	1.34e-05	HL60	0.40824	0	220	0	Mic	High
3190	DB08980	fendiline	1.14e-05	MCF7	0.483556	0.02	2632	0.0463526	Mic	High
3412	DB00573	fenoprofen	7.2e-06	MCF7	1.23549	0	27	0	Mic	High
3714	DB00573	fenoprofen	7.2e-06	PC3	0.410406	0.01	1497	0.0407482	Mic	High
5427	DB01148	flavoxate	9.4e-06	MCF7	1.42422	0	65	0	Mic	High
7405	DB01148	flavoxate	9.4e-06	MCF7	0.544051	0	1336	0	Mic	High
6460	DB11413	florfenicol	1.12e-05	MCF7	0.407022	0.01	1645	0.0370821	Mic	High
316	DB02266	flufenamic acid	1e-05	MCF7	0.587298	0	15	0	Mic	Inter
5059	DB02266	flufenamic acid	1.42e-05	PC3	0.484016	0.01	2001	0.0304848	Mic	High
4272	DB00663	flumetasone	9.8e-06	PC3	0.501568	0	676	0	Mic	High
6023	DB00180	flunisolide	9.2e-06	MCF7	0.636616	0	17	0	Mic	Inter
4273	DB11518	flunixin	8.2e-06	PC3	0.48915	0	566	0	Mic	High
2697	DB00623	fluphenazine	1e-05	HL60	1.32321	0	28	0	Mic	High
1662	DB00623	fluphenazine	1e-05	MCF7	0.619124	0	1373	0	Mic	High
6463	DB04842	fluspirilene	8.4e-06	MCF7	0.443384	0.01	1649	0.0369921	Mic	High
4361	DB00499	flutamide	1.44e-05	MCF7	0.453704	0.02	2463	0.0495331	Mic	High
6955	DB00947	fulvestrant	1e-08	MCF7	1.23664	0	44	0	Mic	High
6965	DB00947	fulvestrant	1e-06	MCF7	0.578773	0	748	0	Mic	High
5202	DB00947	fulvestrant	1e-06	MCF7	0.517975	0	622	0	Mic	High
5598	DB00947	fulvestrant	1e-08	MCF7	0.509972	0.01	1669	0.0365488	Mic	High
1293	DB02703	fusidic acid	7.4e-06	HL60	0.545682	0	977	0	Mic	High
6754	DB02703	fusidic acid	7.4e-06	PC3	0.416024	0.02	2614	0.0466718	Mic	High
3472	DB00996	gabapentin	2.34e-05	MCF7	0.829142	0	29	0	Mic	Low
4772	DB00674	galantamine	1.08e-05	MCF7	0.50449	0	603	0	Mic	High
1066	DB02424	geldanamycin	1e-06	MCF7	0.97187	0	31	0	Mic	Low
4002	DB06743	ginkgolide A	9.8e-06	PC3	0.358265	0.01	1661	0.0367249	Mic	High
7202	DB01016	glibenclamide	8e-06	MCF7	0.467463	0	184	0	Mic	High
1546	DB01016	glibenclamide	8e-06	HL60	0.403863	0	1313	0	Mic	High
2870	DB01120	gliclazide	1.24e-05	MCF7	0.569988	0	697	0	Mic	High
5514	DB01120	gliclazide	1.24e-05	MCF7	0.547009	0.01	1573	0.0387794	Mic	High
5089	DB01120	gliclazide	1.24e-05	PC3	0.437831	0	592	0	Mic	High
4973	DB00222	glimepiride	8.2e-06	MCF7	0.827467	0	45	0	Mic	Low
2154	DB00222	glimepiride	8.2e-06	HL60	0.557107	0	29	0	Mic	High
6058	DB13044	gossypol	7.8e-06	MCF7	1.03831	0	92	0	Mic	High
1554	DB01170	guanethidine	1.34e-05	HL60	1.36134	0	124	0	Mic	High
5731	DB01170	guanethidine	1.34e-05	PC3	0.451291	0	467	0	Mic	High
5256	DB01018	guanfacine	1.42e-05	MCF7	0.492165	0	663	0	Mic	High
2634	DB01018	guanfacine	1.42e-05	MCF7	0.433761	0.01	1447	0.0421562	Mic	High
6040	DB06786	halcinonide	8.8e-06	MCF7	0.393875	0.01	1768	0.0345023	Mic	High
6509	DB01218	halofantrine	7.4e-06	MCF7	1.09577	0	4	0	Mic	High
492	DB00502	haloperidol	1e-05	MCF7	1.19596	0	18	0	Mic	High
1628	DB00502	haloperidol	1e-05	MCF7	0.867538	0	7	0	Mic	Low
6963	DB00502	haloperidol	1e-05	MCF7	0.59168	0	746	0	Mic	High
5200	DB00502	haloperidol	1e-05	MCF7	0.52575	0	621	0	Mic	High
6203	DB00502	haloperidol	1e-05	HL60	0.453727	0.01	1423	0.0428672	Mic	High
4468	DB00502	haloperidol	1e-05	PC3	0.422783	0.02	2510	0.0486056	Mic	High
2515	DB07931	hexestrol	1.48e-05	HL60	1.02977	0	78	0	Mic	High
3318	DB08958	hexetidine	1.18e-05	MCF7	1.23905	0	17	0	Mic	High
5477	DB11181	homatropine	1.12e-05	MCF7	0.435897	0.02	2599	0.0469411	Mic	High
4355	DB11064	homosalate	1.52e-05	MCF7	0.493159	0	660	0	Mic	High
3621	DB01275	hydralazine	2.04e-05	MCF7	0.448107	0.01	1705	0.0357771	Mic	High
4746	DB01275	hydralazine	2.04e-05	MCF7	0.434997	0.01	1887	0.0323264	Mic	High
2311	DB01275	hydralazine	2.04e-05	MCF7	0.396356	0	179	0	Mic	High
5284	DB00741	hydrocortisone	1.1e-05	MCF7	1	0	94	0	Mic	High
5789	DB13718	hydroquinine	9.4e-06	PC3	1.1003	0	141	0	Mic	High
2767	DB13718	hydroquinine	9.4e-06	MCF7	0.532385	0	788	0	Mic	High
6660	DB00557	hydroxyzine	9e-06	PC3	0.419516	0.01	1575	0.0387302	Mic	High
5684	DB07118	hymecromone	2.28e-05	MCF7	1.27463	0	36	0	Mic	High
2108	DB00424	hyoscyamine	1.38e-05	PC3	0.450142	0	14	0	Mic	High
1899	DB00249	idoxuridine	1.12e-05	PC3	1.34773	0	37	0	Mic	High
4785	DB00249	idoxuridine	1.12e-05	MCF7	0.492877	0	607	0	Mic	High
5062	DB14075	imidurea	1.04e-05	PC3	0.469097	0.02	2522	0.0483743	Mic	High
5440	DB00458	imipramine	1.26e-05	MCF7	0.388423	0.01	1610	0.0378882	Mic	High
503	DB00328	indometacin	1e-04	SKMEL5	0.603622	0	21	0	Mic	Inter
5049	DB00328	indometacin	1.12e-05	PC3	0.482684	0	587	0	Mic	High
1729	DB06704	iobenguane	1.08e-05	HL60	1.47085	0	131	0	Mic	High
4848	DB01249	iodixanol	2.6e-06	MCF7	0.855166	0	51	0	Mic	Low
2461	DB01362	iohexol	4.8e-06	HL60	0.471839	0.02	2501	0.0487805	Mic	High
6348	DB08946	iopanoic acid	7e-06	PC3	0.458345	0.01	1777	0.0343275	Mic	High
3365	DB09134	ioversol	5e-06	MCF7	0.701761	0	5	0	Mic	Inter
3528	DB09313	ioxaglic acid	3.2e-06	MCF7	1.15835	0	104	0	Mic	High
2762	DB00332	ipratropium bromide	9.8e-06	MCF7	0.440846	0.01	1482	0.0411606	Mic	High
2562	DB01247	isocarboxazid	1.72e-05	HL60	0.416902	0.02	2487	0.0490551	Mic	High
5857	DB08943	isoconazole	9.6e-06	PC3	0.577356	0	479	0	Mic	High
2246	DB00951	isoniazid	2.92e-05	MCF7	0.495341	0	192	0	Mic	High
5447	DB00270	isradipine	1.08e-05	MCF7	1.2203	0	63	0	Mic	High
2213	DB00602	ivermectin	4.6e-06	MCF7	1.21813	0	98	0	Mic	High
5686	DB01172	kanamycin	6.8e-06	MCF7	0.492165	0	464	0	Mic	High
1593	DB12465	ketanserin	7e-06	HL60	1.42011	0	145	0	Mic	High
1593	DB12465	ketanserin	7e-06	HL60	0.712582	0	1312	0	Mic	High
5685	DB01026	ketoconazole	7.6e-06	MCF7	0.452666	0	463	0	Mic	High
3729	DB01009	ketoprofen	1.58e-05	PC3	1.05391	0	2	0	Mic	High
4286	DB01009	ketoprofen	1.58e-05	PC3	0.481691	0	636	0	Mic	High
5988	DB00465	ketorolac	1.06e-05	MCF7	1.22404	0	3	0	Mic	High
3021	DB11423	lasalocid	6.6e-06	HL60	1.33604	0	86	0	Mic	High
4269	DB00367	levonorgestrel	1.28e-05	PC3	0.433898	0	563	0	Mic	High
2547	DB00367	levonorgestrel	1.28e-05	HL60	0.412036	0.01	2052	0.0297271	Mic	High
4069	DB00451	levothyroxine sodium	5.2e-06	PC3	0.447084	0.01	1628	0.0374693	Mic	High
4947	DB00279	liothyronine	6.2e-06	MCF7	1.20094	0	110	0	Mic	High
6602	DB00279	liothyronine	6.2e-06	PC3	0.433761	0.01	1648	0.0370146	Mic	High
1962	DB00589	lisuride	1.18e-05	PC3	0.72452	0	18	0	Mic	Inter
2763	DB05137	lobeline	1.06e-05	MCF7	0.547209	0	763	0	Mic	High
4745	DB00978	lomefloxacin	1.04e-05	MCF7	0.415242	0.01	1902	0.0320715	Mic	High
7094	DB01206	lomustine	1e-04	PC3	1.07477	0	14	0	Mic	Low
7089	DB01206	lomustine	1e-04	MCF7	0.967666	0	50	0	Mic	Low
7050	DB01206	lomustine	1e-04	PC3	0.80138	0	65	0	Mic	Low
7050	DB01206	lomustine	1e-04	PC3	0.509972	0	166	0	Mic	High
1516	DB00408	loxapine	9e-06	MCF7	0.48147	0.01	1831	0.0333151	Mic	High
5576	DB02656	LY-294002	1e-07	MCF7	0.462008	0	455	0	Mic	High
4440	DB02656	LY-294002	1e-07	PC3	0.449117	0.01	2113	0.0288689	Mic	High
5355	DB12474	lynestrenol	1.4e-05	MCF7	0.657217	0	502	0	Mic	High
2124	DB06795	mafenide	1.8e-05	PC3	1.32538	0	80	0	Mic	High
5079	DB06795	mafenide	1.8e-05	PC3	0.37715	0.01	2013	0.030303	Mic	High
2300	DB00643	mebendazole	1.36e-05	MCF7	0.492681	0.01	1959	0.0311383	Mic	High
6795	DB12554	mebeverine	8.6e-06	MCF7	0.469221	0.02	2587	0.0471589	Mic	High
4795	DB13808	mebhydrolin	4.8e-06	MCF7	0.458689	0.02	2551	0.0478244	Mic	High
1333	DB13808	mebhydrolin	4.8e-06	HL60	0.430656	0	1039	0	Mic	High
3403	DB00253	medrysone	1.16e-05	MCF7	1.24185	0	30	0	Mic	High
3705	DB00253	medrysone	1.16e-05	PC3	0.497044	0	513	0	Mic	High
4266	DB00253	medrysone	1.16e-05	PC3	0.404795	0	483	0	Mic	High
2210	DB00358	mefloquine	9.6e-06	MCF7	0.869138	0	54	0	Mic	Low
2210	DB00358	mefloquine	9.6e-06	MCF7	0.454873	0	36	0	Mic	High
2048	DB00358	mefloquine	9.6e-06	PC3	0.433761	0.01	1848	0.0330087	Mic	High
4304	DB04843	mepenzolate bromide	9.6e-06	PC3	0.504274	0	627	0	Mic	High
6024	DB04843	mepenzolate bromide	9.6e-06	MCF7	0.499139	0	540	0	Mic	High
4707	DB01365	mephentermine	9.4e-06	MCF7	1.1053	0	46	0	Mic	Low
6158	DB00532	mephenytoin	1.84e-05	HL60	1.14987	0	69	0	Mic	High
6158	DB00532	mephenytoin	1.84e-05	HL60	0.460742	0.01	1555	0.0392283	Mic	High
1568	DB06691	mepyramine	1e-05	HL60	0.632956	0	1299	0	Mic	High
4722	DB13392	merbromin	5e-06	MCF7	0.468448	0.01	2095	0.0291169	Mic	High
2577	DB13392	merbromin	5e-06	HL60	0.395294	0	164	0	Mic	High
2874	DB00933	mesoridazine	7.4e-06	MCF7	0.484948	0	694	0	Mic	High
2901	DB00931	metacycline	8.4e-06	HL60	1.07191	0	111	0	Mic	High
7321	DB00931	metacycline	8.4e-06	MCF7	0.529126	0.01	1927	0.0316554	Mic	High
4310	DB04817	metamizole sodium	1.2e-05	PC3	0.466524	0	624	0	Mic	High
4692	DB00610	metaraminol	8.6e-06	MCF7	0.686027	0	3	0	Mic	Inter
2298	DB00610	metaraminol	8.6e-06	MCF7	0.413878	0.01	1957	0.0311702	Mic	High
5344	DB13520	metergoline	1e-05	MCF7	0.55057	0.02	2549	0.0478619	Mic	High
6744	DB13520	metergoline	1e-05	PC3	0.441935	0.02	2620	0.0465649	Mic	High
3	DB00331	metformin	1e-07	MCF7	0.49359	0	1311	0	Mic	High
1858	DB00331	metformin	2.42e-05	HL60	0.489683	0.01	1843	0.0330982	Mic	High
5773	DB06709	methacholine chloride	2.04e-05	PC3	0.470948	0	471	0	Mic	High
6644	DB04819	methapyrilene	1.34e-05	PC3	0.435846	0	892	0	Mic	High
5000	DB00563	methotrexate	8.8e-06	MCF7	0.496138	0	580	0	Mic	High
5007	DB00553	methoxsalen	1.86e-05	MCF7	0.431624	0	584	0	Mic	High
1619	DB00968	methyldopa	1.9e-05	HL60	1.11822	0	146	0	Mic	High
1607	DB00353	methylergometrine	8.8e-06	HL60	0.49603	0	1242	0	Mic	High
1567	DB00959	methylprednisolone	1.06e-05	HL60	1.15667	0	132	0	Mic	High
6785	DB00959	methylprednisolone	1.06e-05	MCF7	0.490028	0.01	1606	0.0379826	Mic	High
7282	DB13284	meticrane	1.46e-05	PC3	0.501005	0	44	0	Mic	High
6672	DB00340	metixene	1.16e-05	PC3	0.737328	0	6	0	Mic	Low
2353	DB01233	metoclopramide	1.18e-05	HL60	1.11624	0	66	0	Mic	High
6292	DB00524	metolazone	1.1e-05	PC3	0.435185	0.01	1463	0.0416951	Mic	High
2543	DB00264	metoprolol	5.8e-06	HL60	0.387132	0.02	2451	0.0497756	Mic	High
4606	DB01011	metyrapone	1.76e-05	PC3	0.39866	0.01	2090	0.0291866	Mic	High
1477	DB01110	miconazole	9.6e-06	MCF7	1.175	0	99	0	Mic	High
1477	DB01110	miconazole	9.6e-06	MCF7	0.5349	0	1361	0	Mic	High
4960	DB01110	miconazole	9.6e-06	MCF7	0.517177	0	568	0	Mic	High
6615	DB01110	miconazole	9.6e-06	PC3	0.468343	0	890	0	Mic	High
6745	DB13456	midecamycin	5e-06	PC3	0.395026	0.01	1561	0.0390775	Mic	High
5827	DB00834	mifepristone	9.4e-06	PC3	1.2952	0	126	0	Mic	High
4814	DB00805	minaprine	1.08e-05	MCF7	0.508547	0	610	0	Mic	High
1996	DB00350	minoxidil	1.92e-05	HL60	1.32049	0	6	0	Mic	High
2896	DB00764	mometasone	7.6e-06	MCF7	0.918468	0	30	0	Mic	Low
627	DB04331	monastrol	1e-04	MCF7	1.08434	0	1	0	Mic	Low
2580	DB11430	monensin	5.8e-06	HL60	1.53076	0	8	0	Mic	High
2580	DB11430	monensin	5.8e-06	HL60	0.467533	0.01	1978	0.0308392	Mic	High
1846	DB09205	moxisylyte	1.26e-05	HL60	0.975535	0	53	0	Mic	Low
7084	DB11841	MS-275	1e-05	PC3	0.495014	0	123	0	Mic	High
7074	DB11841	MS-275	1e-05	PC3	0.464211	0.02	2456	0.0496743	Mic	High
6327	DB00461	nabumetone	1.76e-05	PC3	0.516602	0.01	1724	0.0353828	Mic	High
3323	DB00607	nafcillin	8.8e-06	MCF7	0.961242	0	16	0	Mic	High
7177	DB00844	nalbuphine	1.02e-05	MCF7	0.510408	0	175	0	Mic	High
2297	DB00779	nalidixic acid	1.46e-05	MCF7	0.545314	0	195	0	Mic	High
1869	DB00788	naproxen	1.74e-05	HL60	0.954062	0	15	0	Mic	Low
1916	DB06803	niclosamide	1.22e-05	PC3	1.25269	0	43	0	Mic	High
5682	DB13661	niridazole	1.86e-05	MCF7	0.480723	0	462	0	Mic	High
3087	DB01054	nitrendipine	1.1e-05	HL60	0.504372	0.01	1585	0.0384858	Mic	High
7283	DB01059	norfloxacin	1.26e-05	PC3	0.447683	0	45	0	Mic	High
2391	DB00540	nortriptyline	1.34e-05	HL60	0.480409	0.01	1872	0.0325855	Mic	High
6003	DB00540	nortriptyline	1.34e-05	MCF7	0.430017	0.01	1781	0.0342504	Mic	High
2828	DB00338	omeprazole	1.16e-05	MCF7	1.17867	0	139	0	Mic	High
4951	DB00338	omeprazole	1.16e-05	MCF7	0.508847	0.01	1891	0.0322581	Mic	High
5064	DB13026	ornidazole	1.82e-05	PC3	0.471973	0	590	0	Mic	High
1302	DB01092	ouabain	5.4e-06	HL60	0.561266	0.01	1802	0.0338513	Mic	High
6738	DB13670	oxantel	6.6e-06	PC3	0.381766	0.02	2631	0.0463702	Mic	High
4352	DB00991	oxaprozin	1.36e-05	MCF7	1.01813	0	12	0	Mic	High
4352	DB00991	oxaprozin	1.36e-05	MCF7	0.53496	0	662	0	Mic	High
5519	DB13627	oxolinic acid	1.54e-05	MCF7	0.542208	0	465	0	Mic	High
3568	DB01580	oxprenolol	1.32e-05	MCF7	1.25091	0	122	0	Mic	High
5871	DB01580	oxprenolol	1.32e-05	PC3	0.673295	0	16	0	Mic	Inter
5871	DB01580	oxprenolol	1.32e-05	PC3	0.510186	0	538	0	Mic	High
3996	DB00892	oxybuprocaine	1.16e-05	PC3	0.458636	0	474	0	Mic	High
3168	DB01062	oxybutynin	1.02e-05	MCF7	1.2796	0	58	0	Mic	High
4506	DB03585	oxyphenbutazone	1.24e-05	PC3	0.850941	0	18	0	Mic	Low
1553	DB00595	oxytetracycline	8e-06	HL60	1.23066	0	125	0	Mic	High
1553	DB00595	oxytetracycline	8e-06	HL60	0.517161	0	1323	0	Mic	High
5983	DB12017	ozagrel	1.52e-05	MCF7	0.474359	0.01	1784	0.0341928	Mic	High
5320	DB01229	paclitaxel	4.6e-06	MCF7	0.840894	0	22	0	Mic	Low
640	DB01229	paclitaxel	1e-07	MCF7	0.49325	0	1259	0	Mic	High
4556	DB00715	paroxetine	1e-06	PC3	0.587371	0	616	0	Mic	High
5105	DB13063	parthenolide	1.62e-05	PC3	0.859516	0	5	0	Mic	Low
2885	DB13063	parthenolide	1.62e-05	MCF7	0.402599	0.01	1427	0.042747	Mic	High
2410	DB01074	perhexiline	1.02e-05	HL60	1.3826	0	62	0	Mic	High
2319	DB00780	phenelzine	1.7e-05	MCF7	0.454416	0.01	1934	0.0315408	Mic	High
3779	DB00692	phentolamine	1.26e-05	PC3	0.497242	0.01	1413	0.0431706	Mic	High
3971	DB00692	phentolamine	1.26e-05	MCF7	0.396708	0	477	0	Mic	High
5249	DB13248	phthalylsulfathiazole	1e-05	MCF7	0.391738	0.02	2494	0.0489174	Mic	High
3178	DB01100	pimozide	8.6e-06	MCF7	1.38446	0	55	0	Mic	High
3178	DB01100	pimozide	8.6e-06	MCF7	0.542697	0	900	0	Mic	High
3093	DB13823	pipemidic acid	1.32e-05	HL60	1.29138	0	100	0	Mic	High
6752	DB13823	pipemidic acid	1.32e-05	PC3	0.47792	0	899	0	Mic	High
3093	DB13823	pipemidic acid	1.32e-05	HL60	0.361906	0.01	1590	0.0383648	Mic	High
4320	DB00319	piperacillin	7.4e-06	PC3	0.775478	0	24	0	Mic	Low
3763	DB00319	piperacillin	7.4e-06	PC3	0.474832	0	550	0	Mic	High
6772	DB13351	piperidolate	1.12e-05	MCF7	0.511421	0	902	0	Mic	High
1327	DB12582	piperine	1.4e-05	HL60	0.556245	0	927	0	Mic	High
4830	DB12582	piperine	1.4e-05	MCF7	0.408003	0.02	2563	0.0476005	Mic	High
1710	DB09210	piracetam	2.82e-05	HL60	1.28545	0	120	0	Mic	High
6828	DB02925	piretanide	1.1e-05	MCF7	0.513951	0	859	0	Mic	High
5497	DB09244	pirlindole	1.24e-05	MCF7	0.722705	0	58	0	Mic	Low
5046	DB01604	pivampicillin	8.6e-06	PC3	0.529238	0	586	0	Mic	High
2540	DB01179	podophyllotoxin	9.6e-06	HL60	0.439129	0.02	2454	0.0497148	Mic	High
5664	DB01297	practolol	1.5e-05	MCF7	0.444403	0.01	1626	0.0375154	Mic	High
6443	DB00733	pralidoxime	2.32e-05	MCF7	0.451006	0.01	1593	0.0382925	Mic	High
6474	DB01708	prasterone	1.22e-05	MCF7	1.04574	0	21	0	Mic	High
1572	DB01058	praziquantel	1.28e-05	HL60	1.24459	0	117	0	Mic	High
1737	DB04825	prenylamine	9.6e-06	HL60	1.25674	0	127	0	Mic	High
2886	DB04825	prenylamine	9.6e-06	MCF7	1.19743	0	130	0	Mic	High
2886	DB04825	prenylamine	9.6e-06	MCF7	0.51842	0.01	1428	0.0427171	Mic	High
5489	DB04825	prenylamine	9.6e-06	MCF7	0.438746	0.02	2651	0.0460204	Mic	High
5860	DB13642	pridinol	1.02e-05	PC3	0.403867	0	508	0	Mic	High
3279	DB01087	primaquine	8.8e-06	MCF7	0.59928	0	903	0	Mic	High
4845	DB01087	primaquine	8.8e-06	MCF7	0.469373	0	617	0	Mic	High
5323	DB00794	primidone	1.84e-05	MCF7	1.29083	0	54	0	Mic	High
4771	DB01032	probenecid	1.4e-05	MCF7	0.514609	0	602	0	Mic	High
1608	DB01599	probucol	7.8e-06	HL60	0.619445	0	1240	0	Mic	High
5663	DB01035	procainamide	1.48e-05	MCF7	1.11587	0	46	0	Mic	High
5663	DB01035	procainamide	1.48e-05	MCF7	0.674603	0	19	0	Mic	Inter
1838	DB00721	procaine	1.46e-05	HL60	1.31379	0	31	0	Mic	High
1838	DB00721	procaine	1.46e-05	HL60	0.476863	0	419	0	Mic	High
3533	DB01168	procarbazine	1.56e-05	MCF7	1.0166	0	149	0	Mic	High
4992	DB00396	progesterone	1.28e-05	MCF7	0.448663	0	575	0	Mic	High
6028	DB00420	promazine	1.24e-05	MCF7	1.13534	0	20	0	Mic	High
6028	DB00420	promazine	1.24e-05	MCF7	0.538061	0	541	0	Mic	High
5317	DB01069	promethazine	1.24e-05	MCF7	0.692288	0	637	0	Mic	High
2871	DB01182	propafenone	1.06e-05	MCF7	0.475947	0.01	1426	0.042777	Mic	High
3583	DB09342	propoxycaine	1.2e-05	MCF7	0.424141	0	533	0	Mic	High
4157	DB00550	propylthiouracil	2.34e-05	MCF7	0.360825	0.02	2636	0.0462822	Mic	High
2920	DB13307	proscillaridin	7.6e-06	HL60	1.03806	0	49	0	Mic	High
7290	DB13449	proxyphylline	1.68e-05	PC3	0.513276	0	52	0	Mic	High
3310	DB08437	puromycin	7.4e-06	MCF7	0.497151	0	812	0	Mic	High
1759	DB00165	pyridoxine	1.94e-05	HL60	0.907762	0	19	0	Mic	Low
2751	DB00165	pyridoxine	1.94e-05	MCF7	0.527818	0	737	0	Mic	High
6339	DB06816	pyrvinium	3.4e-06	PC3	0.564371	0	821	0	Mic	High
3191	DB00908	quinidine	1.06e-05	MCF7	0.469373	0	897	0	Mic	High
6235	DB00481	raloxifene	7.8e-06	MCF7	1.23393	0	60	0	Mic	High
3572	DB00178	ramipril	9.6e-06	MCF7	1.01033	0	66	0	Mic	Low
6324	DB00863	ranitidine	1.14e-05	PC3	0.511396	0	531	0	Mic	High
1404	DB00863	ranitidine	1.14e-05	HL60	0.490108	0.01	1829	0.0333516	Mic	High
6342	DB00409	remoxipride	9.8e-06	PC3	0.527066	0	823	0	Mic	High
3124	DB00409	remoxipride	9.8e-06	HL60	0.453731	0.01	1604	0.0380299	Mic	High
3558	DB00912	repaglinide	8.8e-06	MCF7	1.27634	0	1	0	Mic	High
5862	DB00912	repaglinide	8.8e-06	PC3	0.566639	0	509	0	Mic	High
3558	DB00912	repaglinide	8.8e-06	MCF7	0.47151	0	679	0	Mic	High
2130	DB01180	rescinnamine	6.4e-06	HL60	1.20608	0	82	0	Mic	High
2130	DB01180	rescinnamine	6.4e-06	HL60	0.497999	0	3	0	Mic	High
2865	DB02709	resveratrol	1.76e-05	MCF7	0.421586	0	699	0	Mic	High
1767	DB00140	riboflavin	1.06e-05	HL60	1.11908	0	107	0	Mic	High
4485	DB00140	riboflavin	1.06e-05	PC3	0.54416	0	573	0	Mic	High
2760	DB00140	riboflavin	1.06e-05	MCF7	0.415954	0.02	2497	0.0488586	Mic	High
6822	DB00140	riboflavin	1.06e-05	MCF7	0.413195	0	857	0	Mic	High
6512	DB11738	rilmenidine	8.4e-06	MCF7	0.532764	0	806	0	Mic	High
5092	DB00896	rimexolone	1.08e-05	PC3	0.456426	0.02	2457	0.049654	Mic	High
5920	DB11457	rotenone	1e-06	PC3	1.05866	0	42	0	Mic	High
3511	DB11458	roxarsone	1.52e-05	MCF7	0.504308	0	828	0	Mic	High
5051	DB11458	roxarsone	1.52e-05	PC3	0.502502	0	588	0	Mic	High
3677	DB01001	salbutamol	1.68e-05	PC3	1.06076	0	29	0	Mic	High
5770	DB01232	saquinavir	5.2e-06	PC3	0.416642	0.01	1617	0.0377242	Mic	High
6127	DB01232	saquinavir	5.2e-06	HL60	0.416273	0.01	1685	0.0362018	Mic	High
2826	DB01037	selegiline	1.78e-05	MCF7	0.52408	0	768	0	Mic	High
4673	DB08839	serotonin	1.88e-05	PC3	0.866124	0	57	0	Mic	Low
6167	DB00877	sirolimus	1e-07	HL60	1.30139	0	23	0	Mic	High
1148	DB00877	sirolimus	1e-07	HL60	1.20241	0	90	0	Mic	High
5218	DB00877	sirolimus	1e-07	MCF7	0.419825	0.01	1450	0.042069	Mic	High
4773	DB00919	spectinomycin	9.8e-06	MCF7	0.56783	0	604	0	Mic	High
3938	DB06145	spiramycin	4.8e-06	MCF7	1.35715	0	68	0	Mic	High
6255	DB00421	spironolactone	9.6e-06	MCF7	0.569249	0	512	0	Mic	High
5781	DB00421	spironolactone	9.6e-06	PC3	0.527778	0	472	0	Mic	High
2166	DB13580	succinylsulfathiazole	1.12e-05	HL60	1.35232	0	91	0	Mic	High
2166	DB13580	succinylsulfathiazole	1.12e-05	HL60	0.367777	0.02	2578	0.0473235	Mic	High
4998	DB06820	sulconazole	8.6e-06	MCF7	0.561742	0	579	0	Mic	High
1852	DB00359	sulfadiazine	1.6e-05	HL60	0.94635	0	52	0	Mic	Low
5098	DB00359	sulfadiazine	1.6e-05	PC3	0.488167	0	620	0	Mic	High
2560	DB01582	sulfadimidine	1.34e-05	HL60	0.422954	0.01	2040	0.029902	Mic	High
5257	DB00263	sulfafurazole	1.5e-05	MCF7	0.469789	0.01	1473	0.0414121	Mic	High
1495	DB13726	sulfaguanidine	1.86e-05	MCF7	0.967829	0	49	0	Mic	Low
4839	DB13726	sulfaguanidine	1.86e-05	MCF7	0.492585	0	615	0	Mic	High
4740	DB01581	sulfamerazine	1.52e-05	MCF7	0.430912	0	599	0	Mic	High
6272	DB00576	sulfamethizole	1.48e-05	MCF7	0.566239	0	518	0	Mic	High
5732	DB06821	sulfametoxydiazine	1.42e-05	PC3	0.511161	0.01	1631	0.0374004	Mic	High
204	DB00795	sulfasalazine	1e-04	MCF7	1.08187	0	114	0	Mic	High
2882	DB00795	sulfasalazine	1e-05	MCF7	0.47105	0	689	0	Mic	High
4769	DB06147	sulfathiazole	1.56e-05	MCF7	1.4285	0	116	0	Mic	High
4769	DB06147	sulfathiazole	1.56e-05	MCF7	0.52679	0.01	1914	0.0318704	Mic	High
5528	DB00605	sulindac	1.12e-05	MCF7	0.714158	0	8	0	Mic	Low
1297	DB13340	suloctidil	1.18e-05	HL60	1.29899	0	7	0	Mic	High
5021	DB13340	suloctidil	1.18e-05	MCF7	1.27065	0	112	0	Mic	High
6675	DB13340	suloctidil	1.18e-05	PC3	1.11959	0	123	0	Mic	High
6675	DB13340	suloctidil	1.18e-05	PC3	0.521447	0	895	0	Mic	High
1297	DB13340	suloctidil	1.18e-05	HL60	0.452968	0	970	0	Mic	High
3343	DB00870	suprofen	1.54e-05	MCF7	0.524929	0	809	0	Mic	High
169	DB00864	tacrolimus	1e-06	MCF7	0.891976	0	43	0	Mic	Low
2050	DB00675	tamoxifen	7e-06	PC3	0.674673	0	98	0	Mic	High
1063	DB05134	tanespimycin	1e-06	MCF7	1.02682	0	34	0	Mic	Low
1005	DB05134	tanespimycin	1e-06	MCF7	0.991007	0	44	0	Mic	Low
1044	DB05134	tanespimycin	1e-06	MCF7	0.964624	0	10	0	Mic	Low
6944	DB05134	tanespimycin	1e-06	MCF7	0.860188	0	42	0	Mic	Low
428	DB05134	tanespimycin	1e-06	MCF7	0.833253	0	61	0	Mic	Low
5203	DB05134	tanespimycin	1e-06	MCF7	0.804931	0	20	0	Mic	Low
221	DB05134	tanespimycin	1e-07	MCF7	0.770453	0	60	0	Mic	Low
5914	DB05134	tanespimycin	1e-06	MCF7	0.761744	0	36	0	Mic	Low
1006	DB05134	tanespimycin	1e-06	MCF7	0.756608	0	13	0	Mic	Inter
4450	DB05134	tanespimycin	1e-06	PC3	0.622708	0	23	0	Mic	Inter
1044	DB05134	tanespimycin	1e-06	MCF7	0.607684	0	12	0	Mic	Inter
5578	DB05134	tanespimycin	1e-06	MCF7	0.599595	0	32	0	Mic	Inter
5203	DB05134	tanespimycin	1e-06	MCF7	0.521613	0	651	0	Mic	High
5585	DB05134	tanespimycin	1e-06	MCF7	0.467949	0	457	0	Mic	High
2227	DB00342	terfenadine	8.4e-06	MCF7	1.11384	0	73	0	Mic	High
1381	DB00342	terfenadine	8.4e-06	HL60	0.54152	0	1023	0	Mic	High
6082	DB14066	tetrandrine	6.4e-06	MCF7	0.474586	0	544	0	Mic	High
2520	DB14066	tetrandrine	6.4e-06	HL60	0.449867	0.02	2466	0.0494728	Mic	High
1411	DB01041	thalidomide	1.54e-05	HL60	0.958958	0	41	0	Mic	Low
3326	DB00277	theophylline	2.02e-05	MCF7	1.2632	0	14	0	Mic	High
3326	DB00277	theophylline	2.02e-05	MCF7	0.489316	0.01	1641	0.0371725	Mic	High
7479	DB00152	thiamine	1.18e-05	MCF7	1.27649	0	105	0	Mic	High
1867	DB08621	thiamphenicol	1.12e-05	HL60	0.46071	0	398	0	Mic	High
1726	DB11582	thiocolchicoside	7e-06	HL60	1.35021	0	101	0	Mic	High
5095	DB11582	thiocolchicoside	7e-06	PC3	0.447713	0.01	2044	0.0298434	Mic	High
1171	DB00679	thioridazine	1e-05	HL60	1.30779	0	85	0	Mic	High
1068	DB00679	thioridazine	1e-05	MCF7	1.24031	0	76	0	Mic	High
4164	DB00679	thioridazine	9.8e-06	MCF7	1.21145	0	113	0	Mic	High
1010	DB00679	thioridazine	1e-05	MCF7	0.873533	0	40	0	Mic	Low
1230	DB00679	thioridazine	1e-05	PC3	0.52663	0	1202	0	Mic	High
5227	DB00679	thioridazine	1e-05	MCF7	0.471027	0	655	0	Mic	High
1171	DB00679	thioridazine	1e-05	HL60	0.452449	0.01	2053	0.0297126	Mic	High
7362	DB13025	tiapride	1.1e-05	PC3	0.431671	0.01	1719	0.0354857	Mic	High
2568	DB00911	tinidazole	1.62e-05	HL60	0.311053	0.02	2491	0.0489763	Mic	High
2841	DB00684	tobramycin	8.6e-06	MCF7	0.53633	0	733	0	Mic	High
1918	DB00797	tolazoline	2.04e-05	PC3	1.15993	0	45	0	Mic	High
2359	DB01124	tolbutamide	1.48e-05	HL60	0.487873	0	221	0	Mic	High
6354	DB09216	tolfenamic acid	1.52e-05	PC3	1.20988	0	89	0	Mic	High
7452	DB00656	trazodone	9.8e-06	MCF7	0.582137	0	955	0	Mic	High
6243	DB00755	tretinoin	1.34e-05	MCF7	0.604395	0	535	0	Mic	High
6971	DB00755	tretinoin	1e-06	MCF7	0.578687	0	752	0	Mic	High
1548	DB00755	tretinoin	1.34e-05	HL60	0.529172	0	1316	0	Mic	High
6931	DB00755	tretinoin	1e-06	MCF7	0.527778	0	683	0	Mic	High
1152	DB00755	tretinoin	1e-06	HL60	0.486875	0	1107	0	Mic	High
6170	DB00755	tretinoin	1e-06	HL60	0.485482	0.01	1430	0.0426573	Mic	High
447	DB00755	tretinoin	1e-06	PC3	0.359907	0	1353	0	Mic	High
6328	DB13227	tribenoside	8.4e-06	PC3	0.514245	0.01	1727	0.0353214	Mic	High
1004	DB00831	trifluoperazine	1e-05	MCF7	0.530627	0.01	1462	0.0417237	Mic	High
2684	DB00831	trifluoperazine	1e-05	HL60	0.49865	0.01	1466	0.0416098	Mic	High
5221	DB00831	trifluoperazine	1e-05	MCF7	0.438263	0.01	1405	0.0434164	Mic	High
6183	DB00831	trifluoperazine	1e-05	HL60	0.429764	0.01	1429	0.0426872	Mic	High
7466	DB00508	triflupromazine	1.02e-05	MCF7	1.09866	0	48	0	Mic	Low
6136	DB00432	trifluridine	1.36e-05	HL60	1.27908	0	59	0	Mic	High
2876	DB09069	trimetazidine	1.18e-05	MCF7	0.505038	0	704	0	Mic	High
2307	DB00440	trimethoprim	1.38e-05	MCF7	0.478253	0	181	0	Mic	High
4083	DB00726	trimipramine	9.8e-06	PC3	0.422078	0	478	0	Mic	High
7408	DB00427	triprolidine	1.28e-05	MCF7	1.03678	0	63	0	Mic	Low
6949	DB00197	troglitazone	1e-05	MCF7	1.14636	0	41	0	Mic	High
6191	DB00197	troglitazone	1e-05	HL60	0.570986	0	11	0	Mic	Inter
504	DB00197	troglitazone	1e-05	SKMEL5	0.491293	0	1252	0	Mic	High
4456	DB00197	troglitazone	1e-05	PC3	0.433048	0	583	0	Mic	High
4280	DB00809	tropicamide	1.4e-05	PC3	0.450142	0	640	0	Mic	High
5672	DB06439	tyloxapol	4e-06	MCF7	0.509286	0	461	0	Mic	High
6929	DB00313	valproic acid	0.001	MCF7	1.06412	0	35	0	Mic	High
5211	DB00313	valproic acid	2e-04	MCF7	0.444632	0.02	2472	0.0493528	Mic	High
4446	DB00313	valproic acid	5e-05	PC3	0.413167	0.02	2536	0.0481073	Mic	High
3240	DB03701	vanoxerine	7.6e-06	MCF7	0.504829	0.01	1651	0.0369473	Mic	High
6817	DB00460	verteporfin	2.8e-06	MCF7	0.459645	0.01	1744	0.0349771	Mic	High
7556	DB00570	vinblastine	1e-07	PC3	0.832392	0	20	0	Mic	Inter
1557	DB12131	vinpocetine	1.14e-05	HL60	0.640115	0	1301	0	Mic	High
5859	DB12131	vinpocetine	1.14e-05	PC3	0.470326	0	507	0	Mic	High
7213	DB12131	vinpocetine	1.14e-05	MCF7	0.449786	0	188	0	Mic	High
4147	DB11477	xylazine	1.82e-05	MCF7	1.03624	0	138	0	Mic	High
2926	DB02918	zardaverine	1.5e-05	HL60	0.377003	0	724	0	Mic	High
4479	DB04828	zomepirac	1.28e-05	PC3	0.525643	0	574	0	Mic	High
7356	DB01624	zuclopenthixol	9.2e-06	MCF7	0.835724	0	59	0	Mic	Low
6589	DB03444	6-bromoindirubin-3'-oxime	5e-07	MCF7	1.23907	0	62	0	Oli	High
5510	DB04711	adipiodone	3.6e-06	MCF7	1.48027	0	16	0	Oli	Inter
1842	DB11100	allantoin	2.52e-05	HL60	1	0	18	0	Oli	Inter
4099	DB00770	alprostadil	1.12e-05	PC3	1.10768	0	15	0	Oli	High
6467	DB00488	altretamine	1.9e-05	MCF7	1.1638	0	56	0	Oli	High
1051	DB12442	alvespimycin	1e-07	MCF7	1.50595	0	6	0	Oli	High
5573	DB12442	alvespimycin	1e-07	MCF7	1.31503	0	73	0	Oli	High
3036	DB01223	aminophylline	9.6e-06	HL60	1.63585	0	55	0	Oli	Inter
6353	DB00321	amitriptyline	1.28e-05	PC3	1.38149	0	57	0	Oli	High
3257	DB07352	apigenin	1.48e-05	MCF7	1.1706	0	9	0	Oli	Inter
6262	DB01061	azlocillin	8.2e-06	MCF7	0.92991	0	34	0	Oli	High
3051	DB13740	bemegride	2.58e-05	HL60	1.15223	0	78	0	Oli	Inter
5669	DB00195	betaxolol	1.16e-05	MCF7	1.26145	0	27	0	Oli	Inter
3321	DB00810	biperiden	1.14e-05	MCF7	1.3887	0	20	0	Oli	High
5515	DB13346	bufexamac	1.8e-05	MCF7	1.5434	0	5	0	Oli	Inter
7413	DB13346	bufexamac	1.8e-05	MCF7	1.38812	0	65	0	Oli	High
5090	DB13346	bufexamac	1.8e-05	PC3	1.09008	0	52	0	Oli	Inter
4258	DB13510	buflomedil	1.16e-05	PC3	1.23739	0	11	0	Oli	Inter
1683	DB00564	carbamazepine	1.7e-05	MCF7	1	0	53	0	Oli	Inter
2725	DB00748	carbinoxamine	9.8e-06	HL60	1.1916	0	19	0	Oli	High
6323	DB01329	cefoperazone	5.8e-06	PC3	1.50025	0	47	0	Oli	High
5473	DB00438	ceftazidime	6.2e-06	MCF7	1.52582	0	54	0	Oli	Inter
1969	DB00527	cinchocaine	1.16e-05	HL60	1.47886	0	24	0	Oli	High
5783	DB00827	cinoxacin	1.52e-05	PC3	1.51716	0	37	0	Oli	Inter
416	DB00363	clozapine	1e-05	MCF7	1.53484	0	44	0	Oli	Inter
7055	DB02587	colforsin	5e-07	MCF7	1.3341	0	37	0	Oli	High
4064	DB04652	corticosterone	1.16e-05	PC3	1.24047	0	42	0	Oli	High
5533	DB02527	cyclic adenosine monophosphate	1.22e-05	MCF7	1.47459	0	39	0	Oli	Inter
5108	DB02527	cyclic adenosine monophosphate	1.22e-05	PC3	1.36141	0	54	0	Oli	High
3555	DB00979	cyclopentolate	1.22e-05	MCF7	1.36948	0	30	0	Oli	Inter
3867	DB01219	dantrolene	1.18e-05	MCF7	1.58331	0	68	0	Oli	Inter
3978	DB01219	dantrolene	1.18e-05	MCF7	1.30761	0	2	0	Oli	High
4343	DB01219	dantrolene	1.18e-05	PC3	1.21515	0	25	0	Oli	High
3867	DB01219	dantrolene	1.18e-05	MCF7	1.16973	0	52	0	Oli	High
6688	DB04840	debrisoquine	9e-06	PC3	1.31103	0	23	0	Oli	High
5681	DB11622	dehydrocholic acid	9.6e-06	MCF7	1.39071	0	71	0	Oli	Inter
4728	DB00618	demeclocycline	8e-06	MCF7	1.09151	0	30	0	Oli	High
5118	DB13466	deptropine	7.6e-06	PC3	1.13112	0	41	0	Oli	High
1276	DB04209	dequalinium chloride	7.6e-06	HL60	1.09728	0	66	0	Oli	Inter
6471	DB09213	dexibuprofen	1.94e-05	MCF7	1.56464	0	43	0	Oli	Inter
3027	DB01144	diclofenamide	1.32e-05	HL60	1.2864	0	44	0	Oli	High
3027	DB01144	diclofenamide	1.32e-05	HL60	1.09374	0	69	0	Oli	Inter
4581	DB00804	dicycloverine	1.16e-05	PC3	1.29671	0	21	0	Oli	High
1483	DB00804	dicycloverine	1.16e-05	MCF7	1.20216	0	15	0	Oli	High
2374	DB01231	difenidol	1.16e-05	HL60	1.04354	0	62	0	Oli	Inter
4794	DB00861	diflunisal	1.6e-05	MCF7	1.43868	0	10	0	Oli	High
6228	DB11512	dihydrostreptomycin	2.8e-06	MCF7	1.26371	0	14	0	Oli	High
3101	DB11221	dioxybenzone	1.64e-05	HL60	1.39964	0	13	0	Oli	Inter
2737	DB00254	doxycycline	8.4e-06	HL60	1.32339	0	42	0	Oli	Inter
5601	DB00783	estradiol	1e-08	MCF7	1.33391	0	32	0	Oli	Inter
3176	DB13790	fipexide	9.4e-06	MCF7	1.351	0	23	0	Oli	Inter
2328	DB00687	fludrocortisone	9.4e-06	MCF7	1.31514	0	1	0	Oli	High
5844	DB00158	folic acid	9e-06	PC3	1.2199	0	16	0	Oli	High
523	DB00947	fulvestrant	1e-06	ssMCF7	1.32034	0	57	0	Oli	Inter
4804	DB12831	gabexate	9.6e-06	MCF7	1.26801	0	18	0	Oli	High
864	DB02424	geldanamycin	1e-06	MCF7	1.55467	0	7	0	Oli	High
5588	DB02424	geldanamycin	1e-06	MCF7	1.38081	0	45	0	Oli	High
382	DB01645	genistein	1e-05	MCF7	1.2383	0	23	0	Oli	High
3427	DB00986	glycopyrronium bromide	1e-05	MCF7	1.22335	0	38	0	Oli	High
1703	DB13574	heptaminol	2.2e-05	MCF7	1.48991	0	17	0	Oli	High
1487	DB00999	hydrochlorothiazide	1.34e-05	MCF7	1.24264	0	63	0	Oli	High
6465	DB12551	idazoxan	1.66e-05	MCF7	1.38626	0	2	0	Oli	Inter
5347	DB12551	idazoxan	1.66e-05	MCF7	1.28496	0	16	0	Oli	High
6747	DB12551	idazoxan	1.66e-05	PC3	1.24457	0	24	0	Oli	High
488	DB01088	iloprost	1e-06	MCF7	1.3081	0	60	0	Oli	High
5049	DB00328	indometacin	1.12e-05	PC3	1.22005	0	75	0	Oli	Inter
3026	DB09134	ioversol	5e-06	HL60	1.20928	0	61	0	Oli	Inter
3026	DB09134	ioversol	5e-06	HL60	1.20168	0	6	0	Oli	High
5842	DB00920	ketotifen	9.4e-06	PC3	1.3066	0	31	0	Oli	High
3509	DB01106	levocabastine	8.8e-06	MCF7	1.26644	0	10	0	Oli	High
3041	DB15584	luteolin	1.4e-05	HL60	1.44385	0	58	0	Oli	Inter
1216	DB02656	LY-294002	1e-07	PC3	1.44066	0	49	0	Oli	High
6195	DB02656	LY-294002	1e-05	HL60	1.2618	0	33	0	Oli	High
4729	DB13758	meclofenoxate	1.36e-05	MCF7	1.19532	0	32	0	Oli	High
7223	DB06691	mepyramine	1e-05	MCF7	1.37559	0	2	0	Oli	High
4722	DB13392	merbromin	5e-06	MCF7	1.30834	0	27	0	Oli	High
6162	DB00244	mesalazine	2.62e-05	HL60	1.39513	0	80	0	Oli	Inter
7368	DB00610	metaraminol	8.6e-06	PC3	1.07067	0	45	0	Oli	Inter
4156	DB01578	metrizamide	5e-06	MCF7	1.3335	0	25	0	Oli	Inter
5786	DB06148	mianserin	1.32e-05	PC3	1.24631	0	59	0	Oli	High
2026	DB13456	midecamycin	5e-06	HL60	1.00509	0	35	0	Oli	High
3185	DB00834	mifepristone	9.4e-06	MCF7	1.39497	0	41	0	Oli	Inter
4800	DB00350	minoxidil	1.92e-05	MCF7	1.51202	0	14	0	Oli	High
6091	DB14128	nadide	6e-06	MCF7	1.13361	0	39	0	Oli	High
3043	DB00627	nicotinic acid	3.24e-05	HL60	1.10499	0	76	0	Oli	Inter
2341	DB00698	nitrofurantoin	1.68e-05	HL60	1.4282	0	72	0	Oli	High
5863	DB04821	nomifensine	1.12e-05	PC3	1.46083	0	8	0	Oli	Inter
7300	DB00540	nortriptyline	1.34e-05	PC3	1.45319	0	73	0	Oli	Inter
2467	DB00338	omeprazole	1.16e-05	HL60	1.3917	0	1	0	Oli	Inter
2318	DB01173	orphenadrine	1.3e-05	MCF7	1.27032	0	4	0	Oli	High
4652	DB00925	phenoxybenzamine	1.18e-05	PC3	1.16102	0	21	0	Oli	High
3033	DB13248	phthalylsulfathiazole	1e-05	HL60	1.28159	0	59	0	Oli	Inter
6893	DB01132	pioglitazone	1e-05	PC3	1.30782	0	22	0	Oli	Inter
4398	DB13744	piromidic acid	1.38e-05	MCF7	1.37731	0	79	0	Oli	Inter
6014	DB01605	pivmecillinam	8.4e-06	MCF7	1.31864	0	14	0	Oli	Inter
3189	DB01058	praziquantel	1.28e-05	MCF7	1.58582	0	36	0	Oli	Inter
2173	DB00420	promazine	1.24e-05	HL60	1.49303	0	40	0	Oli	Inter
3352	DB00782	propantheline bromide	9e-06	MCF7	1.3682	0	67	0	Oli	Inter
6338	DB00344	protriptyline	1.34e-05	PC3	1.3731	0	48	0	Oli	High
7316	DB00811	ribavirin	1.64e-05	PC3	1.50968	0	70	0	Oli	High
2635	DB00867	ritodrine	1.24e-05	MCF7	1.26068	0	11	0	Oli	High
4154	DB14038	sitosterol	9.6e-06	MCF7	1.22103	0	29	0	Oli	High
3818	DB12704	spiradoline	1e-06	PC3	1.3164	0	12	0	Oli	High
3035	DB06820	sulconazole	8.6e-06	HL60	1.3682	0	56	0	Oli	Inter
6634	DB09355	sulfabenzamide	1.44e-05	PC3	1.34979	0	48	0	Oli	Inter
2191	DB11461	sulfachlorpyridazine	1.4e-05	HL60	1.2137	0	5	0	Oli	High
4740	DB01581	sulfamerazine	1.52e-05	MCF7	1.44354	0	6	0	Oli	Inter
2882	DB00795	sulfasalazine	1e-05	MCF7	1.09137	0	47	0	Oli	Inter
7496	DB04786	suramin sodium	1e-05	MCF7	1.25414	0	5	0	Oli	High
2954	DB13814	talampicillin	7.8e-06	HL60	1.02212	0	49	0	Oli	Inter
1063	DB05134	tanespimycin	1e-06	MCF7	1.48322	0	71	0	Oli	High
6944	DB05134	tanespimycin	1e-06	MCF7	1.38205	0	28	0	Oli	High
1631	DB05134	tanespimycin	1e-06	MCF7	1.37846	0	69	0	Oli	High
5215	DB05134	tanespimycin	1e-06	MCF7	1.3587	0	1	0	Oli	High
5914	DB05134	tanespimycin	1e-06	MCF7	1.32617	0	12	0	Oli	High
2678	DB05134	tanespimycin	1e-06	HL60	1.22682	0	46	0	Oli	High
5566	DB05134	tanespimycin	1e-06	MCF7	1.1744	0	43	0	Oli	High
5694	DB13399	terguride	8.8e-06	MCF7	1.46721	0	26	0	Oli	Inter
2258	DB01041	thalidomide	1.54e-05	MCF7	1.60876	0	74	0	Oli	Inter
6613	DB01412	theobromine	2.22e-05	PC3	1.46122	0	17	0	Oli	Inter
3334	DB01412	theobromine	2.22e-05	MCF7	1.23717	0	18	0	Oli	High
1171	DB00679	thioridazine	1e-05	HL60	1.36678	0	36	0	Oli	High
422	DB00679	thioridazine	1e-06	MCF7	1.34274	0	22	0	Oli	High
4402	DB00730	tiabendazole	1.98e-05	MCF7	1.44712	0	20	0	Oli	Inter
7011	DB03604	tiratricol	6.4e-06	MCF7	1.49171	0	65	0	Oli	Inter
7011	DB03604	tiratricol	6.4e-06	MCF7	1.28032	0	25	0	Oli	High
2842	DB00839	tolazamide	1.28e-05	MCF7	1.5005	0	26	0	Oli	High
5762	DB00302	tranexamic acid	2.54e-05	PC3	1.30071	0	19	0	Oli	High
6515	DB09283	trapidil	1.94e-05	MCF7	1.21043	0	50	0	Oli	High
1211	DB00755	tretinoin	1e-06	PC3	1.33316	0	67	0	Oli	High
6341	DB00831	trifluoperazine	8.4e-06	PC3	1.32508	0	70	0	Oli	Inter
4456	DB00197	troglitazone	1e-05	PC3	1.27661	0	28	0	Oli	Inter
3619	DB00809	tropicamide	1.4e-05	MCF7	1.32963	0	8	0	Oli	High
3722	DB00809	tropicamide	1.4e-05	PC3	1.31215	0	26	0	Oli	High
2347	DB00809	tropicamide	1.4e-05	HL60	1.1545	0	13	0	Oli	High
5672	DB06439	tyloxapol	4e-06	MCF7	1.34921	0	19	0	Oli	Inter
2979	DB06827	viomycin	5.2e-06	HL60	1.34503	0	9	0	Oli	High
4793	DB02918	zardaverine	1.5e-05	MCF7	1.52704	0	9	0	Oli	High
4793	DB02918	zardaverine	1.5e-05	MCF7	1.36633	0	24	0	Oli	Inter
6760	DB00131	adenosine phosphate	1.1e-05	PC3	1.17081	0	21	0	OPC	High
1909	DB09088	amylocaine	1.48e-05	PC3	1.1589	0	2	0	OPC	High
7385	DB01327	cefazolin	8.4e-06	PC3	1	0	17	0	OPC	High
5305	DB00604	cisapride	8.6e-06	MCF7	1	0	3	0	OPC	High
913	DB02587	colforsin	5e-05	MCF7	1	0	8	0	OPC	High
4581	DB00804	dicycloverine	1.16e-05	PC3	1.18957	0	1	0	OPC	High
337	DB01023	felodipine	1e-05	MCF7	1	0	9	0	OPC	High
1662	DB00623	fluphenazine	1e-05	MCF7	1	0	13	0	OPC	High
6623	DB13875	harmaline	1.4e-05	PC3	1.07032	0	15	0	OPC	High
1440	DB13836	metampicillin	1.04e-05	HL60	1.12729	0	14	0	OPC	High
5094	DB13627	oxolinic acid	1.54e-05	PC3	1.07695	0	7	0	OPC	High
7449	DB00734	risperidone	9.8e-06	MCF7	1	0	19	0	OPC	High
2681	DB00877	sirolimus	1e-07	HL60	1.22334	0	22	0	OPC	High
2050	DB00675	tamoxifen	7e-06	PC3	1.3617	0	20	0	OPC	High
5762	DB00302	tranexamic acid	2.54e-05	PC3	1.18474	0	18	0	OPC	High
390	DB00755	tretinoin	1e-06	HL60	1.06946	0	10	0	OPC	High

## Sheet: Table_S9_legend
Supplemental Table S9: Supplemental_Table_S9.xlsx Summary of stage-specific drug enrichment identified by GSEA, using gene sets corresponding to Low, Intermediate, and High AD stages. The table reports drug IDs, instances, doses, enrichment scores (ES), p-values, ranks, FDR, associated cell types, and disease stages.
